# Supplementary material for: LASSO regression and WGCNA-based telomerase-associated lncRNA signaling predicts clear cell renal cell carcinoma prognosis and immunotherapy response
Source: publisher site journal article supplement (doi:10.18632/aging.205871), 2024-05-30
Supplement: Supplementary file [file aging-v16i11-205871-supplementary-material-SD1.pdf]

## SUPPLEMENTARY FIGURE

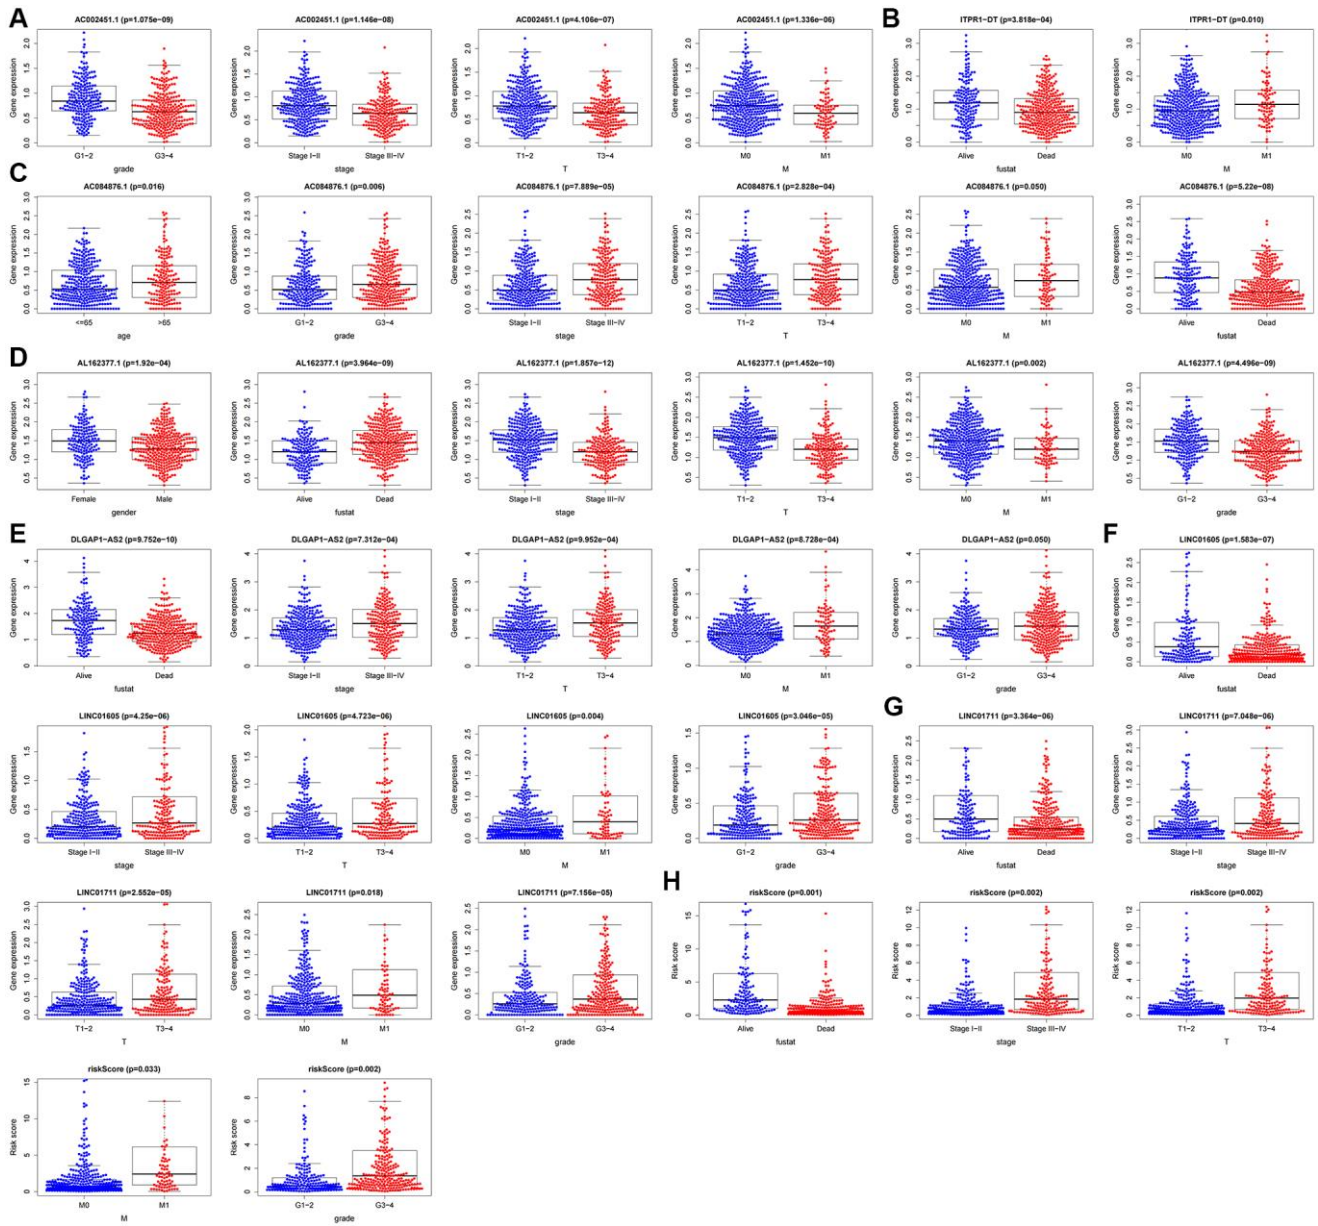

**Supplementary Figure 1. Correlation analysis between the model and clinical characteristics.** (A) Correlation between AC069200.1 expression level and grade, stage, and T stage. (B) Relationship between ITPR1-DT expression level and Survival status, and M stage. (C) Relationship between AC084876.1 expression level and age, gender, stage, Survival status, and grade. (D) Relationship between AL162377.1 expression level and gender, Survival status, tumor grade, T stage, M stage, and stage. (E) Correlation between DLGAP1-AS2 expression level and Survival status, T stage, M stage, grade and stage. (F) Relationship between LINC00460 expression level and Survival status, T stage, M stage, grade and stage. (G) Relationship between LINC01605 expression level and Survival status, T stage, M stage, grade and stage. (H) Relationship between riskScore expression level and Survival status, T stage, M stage, grade and stage.
