# Supplementary material for: LASSO regression and WGCNA-based telomerase-associated lncRNA signaling predicts clear cell renal cell carcinoma prognosis and immunotherapy response
Source: publisher site journal article supplement (doi:10.18632/aging.205871), 2024-05-30
Supplement: Supplementary file [file aging-v16i11-205871-supplementary-material-SD2.pdf]

## SUPPLEMENTARY TABLES

**Supplementary Table 1. Sequences of upstream and downstream primers of prognostic model genes.**

| Primer Name  | Primer sequences (5'-3')  | Fragment length (bp) | Annealing temperature (°C) | GC%   | Number of bases | nmol/OD |
|--------------|---------------------------|----------------------|----------------------------|-------|-----------------|---------|
| AC069200.1-S | CAAGGGCAAAGAAGGCACA       | 83                   | 59.3                       | 52.6  | 19              | 4.20    |
| AC069200.1-A | AAGTCAGCCTCATTCCATACCC    |                      | 59.9                       | 50    | 22              | 4.43    |
| AC002451.1-S | GTGGGAAGAAGCAGGGAAGAGG    | 208                  | 60.1                       | 57.1  | 21              | 3.73    |
| AC002451.1-A | CAATGAGCAGGAATAGTAAGGGGAG |                      | 59.6                       | 45.8  | 24              | 3.33    |
| ITPR1-DT-S   | CAGTGTTCGCGTCAAGGATT      | 210                  | 60.1                       | 47.6  | 21              | 4.40    |
| ITPR1-DT-A   | TATGGCAGATGCGGCAGTTT      |                      | 61.5                       | 50    | 20              | 4.58    |
| DLGAP1-AS2-S | GACACAGACAAGACCCTTTCAATAA | 181                  | 59.24                      | 40    | 25              | 3.43    |
| DLGAP1-AS2-A | GACAGCATCGGGTCAAAGGA      |                      | 60.04                      | 55    | 20              | 4.22    |
| AL162377.1-S | GTCTCCAGCAAGCGCAGTCA      | 113                  | 62                         | 60    | 20              | 4.69    |
| AL162377.1-A | GTCGCAGAACCAGTGGCAAA      |                      | 61.7                       | 55    | 20              | 4.30    |
| AC084876.1-S | ATGGTGCTGGATGGATTAGAGTT   | 294                  | 59.6                       | 43.5  | 23              | 3.84    |
| AC084876.1-A | CATTGAATGGGTTTGCTACTGA    |                      | 58                         | 40.9  | 22              | 4.17    |
| LINC01711-S  | AGTTCGGGCAGCCATAGAGG      | 107                  | 61.69                      | 60    | 20              | 4.42    |
| LINC01711-A  | AGTGTTTCCAGCCATCAGGTT     |                      | 59.85                      | 47.62 | 21              | 4.58    |
| LINC01605-S  | CCGTTACAAACAGCCGACCTT     | 268                  | 61.14                      | 52.38 | 21              | 4.52    |
| LINC01605-A  | TGCAGGCTCCATTTCCAGAC      |                      | 60.32                      | 55    | 20              | 4.91    |
| H-GAPDH-S    | GGAAGCTTGTCATCAATGGAATC   | 168                  | 62.4                       | 57.1  | 24              | 3.63    |
| H-GAPDH-A    | TGATGACCCTTTTGGCTCCC      |                      | 62                         | 55    | 20              | 5.25    |

**Supplementary Table 2. Grey module gene.**

| Gene      | Module |
|-----------|--------|
| H19       | grey   |
| MBD3      | grey   |
| COL1A2    | grey   |
| FOS       | grey   |
| BANF1     | grey   |
| SPP1      | grey   |
| H3C6      | grey   |
| SIRT6     | grey   |
| BCL7C     | grey   |
| COL1A1    | grey   |
| H1-2      | grey   |
| ASF1B     | grey   |
| HMG20B    | grey   |
| TNFRSF11B | grey   |
| MXRA8     | grey   |
| RUVBL2    | grey   |
| MMP9      | grey   |

|         |      |
|---------|------|
| H2AX    | grey |
| CDT1    | grey |
| VDR     | grey |
| MMP1    | grey |
| ZNHIT1  | grey |
| KAT2A   | grey |
| JUN     | grey |
| TIMP1   | grey |
| SIRT7   | grey |
| INO80C  | grey |
| ACP5    | grey |
| INO80E  | grey |
| H4C8    | grey |
| H4C9    | grey |
| SMARCD3 | grey |
| H2BC21  | grey |
| H3C10   | grey |
| H2BC12  | grey |

**Supplementary Table 4. 99 lncRNAs associated with the prognosis of ccRCC patients by univariate Cox regression analysis.**

| Gene       | KM       | B            | SE          | HR          | HR.95L      | HR.95H      | p-value  |
|------------|----------|--------------|-------------|-------------|-------------|-------------|----------|
| AL162458.1 | 1.56E-05 | 0.210649329  | 0.042290881 | 1.234479383 | 1.136281086 | 1.341164052 | 6.33E-07 |
| AC124319.1 | 8.17E-06 | 0.178505579  | 0.039318739 | 1.195429552 | 1.106766019 | 1.291195963 | 5.63E-06 |
| AC011462.4 | 7.40E-05 | 0.062837187  | 0.012284678 | 1.064853453 | 1.039520617 | 1.090803645 | 3.14E-07 |
| AC004034.1 | 8.17E-05 | 0.29921675   | 0.06189628  | 1.348801944 | 1.194708558 | 1.52277028  | 1.34E-06 |
| AC005785.1 | 7.93E-06 | 0.382610412  | 0.067190457 | 1.466106742 | 1.285206669 | 1.672469518 | 1.24E-08 |
| AC016773.1 | 1.44E-06 | 0.589056386  | 0.071679545 | 1.802286949 | 1.566066495 | 2.074138138 | 2.07E-16 |
| AC069200.1 | 1.12E-06 | 0.277641851  | 0.053350219 | 1.320013351 | 1.18895806  | 1.465514474 | 1.95E-07 |
| AC005387.1 | 4.02E-07 | 0.213552338  | 0.040016348 | 1.238068295 | 1.144676126 | 1.339080171 | 9.47E-08 |
| U52111.1   | 5.32E-06 | 0.314652283  | 0.062475652 | 1.369782931 | 1.211915608 | 1.548214467 | 4.74E-07 |
| AL354760.1 | 3.58E-05 | 0.406129335  | 0.060619349 | 1.500996671 | 1.33284745  | 1.690359242 | 2.09E-11 |
| TMEM92-AS1 | 2.29E-07 | 0.154742427  | 0.025593047 | 1.167357243 | 1.110245295 | 1.227407078 | 1.48E-09 |
| AC002451.1 | 7.34E-05 | -1.074856004 | 0.215923    | 0.341346904 | 0.223564055 | 0.521182661 | 6.43E-07 |
| EMX2OS     | 3.10E-08 | -0.028691561 | 0.004703093 | 0.971716133 | 0.962800115 | 0.980714719 | 1.06E-09 |
| AP002807.1 | 1.12E-05 | 0.124064217  | 0.020185807 | 1.132088568 | 1.088173673 | 1.177775715 | 7.94E-10 |
| AC009093.6 | 7.94E-05 | 0.273437337  | 0.061192657 | 1.314474987 | 1.165910041 | 1.481970677 | 7.88E-06 |
| AC008537.4 | 6.35E-06 | 0.285509542  | 0.061348181 | 1.33043977  | 1.179710793 | 1.500427049 | 3.26E-06 |
| AC006272.1 | 8.67E-06 | 0.375439593  | 0.090152948 | 1.45563116  | 1.219868496 | 1.736959418 | 3.12E-05 |
| RNF139-AS1 | 3.49E-05 | 0.553654627  | 0.101568316 | 1.739599    | 1.425588035 | 2.122776431 | 5.01E-08 |
| ZNF436-AS1 | 2.38E-05 | 0.138254947  | 0.031974331 | 1.148268261 | 1.078516419 | 1.222531224 | 1.53E-05 |
| VPS9D1-AS1 | 3.03E-05 | 0.163556805  | 0.026836948 | 1.177692252 | 1.117347254 | 1.241296325 | 1.10E-09 |
| AL158151.4 | 9.18E-07 | 0.221576207  | 0.035349238 | 1.248042354 | 1.164501355 | 1.337576561 | 3.65E-10 |
| AC008105.3 | 1.05E-05 | 0.053898891  | 0.010549385 | 1.055377889 | 1.033780506 | 1.077426477 | 3.24E-07 |
| AC010491.1 | 6.18E-06 | 0.527467098  | 0.088078403 | 1.694634525 | 1.425947636 | 2.013949251 | 2.12E-09 |
| AC018648.1 | 2.58E-08 | 0.277642344  | 0.043255186 | 1.320014002 | 1.212717534 | 1.436803638 | 1.37E-10 |
| AL117379.1 | 4.60E-06 | 0.084364776  | 0.016167744 | 1.088025707 | 1.054088676 | 1.123055361 | 1.81E-07 |
| Z98200.1   | 2.36E-05 | 0.536254533  | 0.098985861 | 1.709591637 | 1.408106384 | 2.075626954 | 6.04E-08 |
| AC020907.4 | 1.06E-05 | 0.095496896  | 0.01839181  | 1.100205407 | 1.061252284 | 1.140588299 | 2.08E-07 |

|             |          |              |             |             |             |             |          |
|-------------|----------|--------------|-------------|-------------|-------------|-------------|----------|
| AC013731.1  | 8.54E-05 | 0.424310293  | 0.079343374 | 1.528535814 | 1.308393617 | 1.785717772 | 8.90E-08 |
| AC068722.2  | 2.94E-05 | 0.264053036  | 0.063322827 | 1.302197258 | 1.150207748 | 1.474270802 | 3.05E-05 |
| AL645940.1  | 1.03E-05 | 0.312454051  | 0.060635026 | 1.366775138 | 1.2136248   | 1.5392519   | 2.56E-07 |
| AC026401.3  | 2.49E-06 | 0.062432673  | 0.008074599 | 1.064422793 | 1.047709917 | 1.081402269 | 1.06E-14 |
| LINC01711   | 1.32E-06 | 0.060821859  | 0.007177486 | 1.062709585 | 1.047864459 | 1.077765023 | 2.37E-17 |
| LINC02352   | 3.10E-07 | 0.435087474  | 0.081576094 | 1.54509821  | 1.316795677 | 1.812983228 | 9.63E-08 |
| LINC02195   | 8.69E-06 | 0.193828964  | 0.034754691 | 1.213888646 | 1.133954433 | 1.299457547 | 2.45E-08 |
| AC023043.1  | 1.57E-07 | 0.171950091  | 0.037149885 | 1.187618559 | 1.104218289 | 1.277317949 | 3.68E-06 |
| ITPR1-DT    | 6.67E-05 | 0.092693182  | 0.023472447 | 1.097125066 | 1.047795078 | 1.1487775   | 7.85E-05 |
| MELTF-AS1   | 1.65E-07 | 0.075243743  | 0.009801118 | 1.078146909 | 1.057633542 | 1.099058144 | 1.63E-14 |
| AC048341.2  | 2.13E-06 | 0.035494384  | 0.006701962 | 1.036131829 | 1.022610611 | 1.049831828 | 1.18E-07 |
| AL139349.1  | 7.02E-05 | 0.030691141  | 0.006712181 | 1.031166969 | 1.017690157 | 1.044822249 | 4.82E-06 |
| LINC01004   | 7.57E-05 | 0.088421251  | 0.015737115 | 1.09244822  | 1.059266908 | 1.12666893  | 1.92E-08 |
| AC002398.1  | 6.04E-06 | 0.332912859  | 0.059003555 | 1.395025729 | 1.242677115 | 1.566051841 | 1.68E-08 |
| LINC00460   | 3.31E-06 | 0.092150886  | 0.012070184 | 1.096530261 | 1.070893943 | 1.122780291 | 2.27E-14 |
| AC002553.1  | 7.15E-05 | 0.098473252  | 0.024899793 | 1.103484888 | 1.050924816 | 1.158673654 | 7.66E-05 |
| IGBP1-AS1   | 7.00E-06 | 0.281076845  | 0.059635824 | 1.324555385 | 1.17844147  | 1.488785834 | 2.44E-06 |
| LINC01507   | 1.20E-08 | -0.079784334 | 0.013819329 | 0.923315453 | 0.89864274  | 0.948665568 | 7.77E-09 |
| AC010864.1  | 1.14E-05 | 0.472209268  | 0.082001733 | 1.603532916 | 1.365456527 | 1.883119501 | 8.49E-09 |
| AC018809.1  | 2.32E-05 | 0.368251985  | 0.082955851 | 1.445206164 | 1.228337349 | 1.700364202 | 9.03E-06 |
| AL589669.1  | 2.09E-05 | -0.020751385 | 0.004680204 | 0.979462443 | 0.970518886 | 0.988488418 | 9.26E-06 |
| AP006545.2  | 3.98E-05 | 0.546884916  | 0.084930784 | 1.72786219  | 1.462904201 | 2.040808787 | 1.20E-10 |
| AL035413.1  | 1.75E-07 | -0.066156467 | 0.013003994 | 0.935984402 | 0.912430075 | 0.960146782 | 3.63E-07 |
| AC103706.1  | 3.41E-08 | 0.202888225  | 0.022953853 | 1.224935543 | 1.171048498 | 1.281302259 | 9.66E-19 |
| ASB16-AS1   | 5.46E-05 | 0.12168514   | 0.030855102 | 1.129398444 | 1.063122413 | 1.199806183 | 8.02E-05 |
| AL021707.6  | 7.77E-05 | 0.038771777  | 0.009458693 | 1.039533211 | 1.020439156 | 1.058984546 | 4.15E-05 |
| AC116407.2  | 7.24E-05 | 0.068924137  | 0.014139443 | 1.07135493  | 1.042072311 | 1.101460401 | 1.09E-06 |
| AC012645.4  | 6.58E-06 | 0.315272933  | 0.080400704 | 1.370633351 | 1.170803714 | 1.604569374 | 8.81E-05 |
| AC027796.4  | 9.20E-05 | 0.098299658  | 0.018795261 | 1.103293347 | 1.063389688 | 1.144694389 | 1.69E-07 |
| MHENCN      | 3.51E-05 | 0.019830846  | 0.004129878 | 1.020028783 | 1.011805575 | 1.028318824 | 1.57E-06 |
| SNHG3       | 6.69E-05 | 0.056756351  | 0.008006512 | 1.058397902 | 1.041918657 | 1.075137786 | 1.35E-12 |
| AC092757.3  | 2.78E-06 | 0.224063843  | 0.044451374 | 1.251150894 | 1.146760203 | 1.365044371 | 4.64E-07 |
| AL021392.1  | 6.09E-05 | 0.199257227  | 0.044761861 | 1.220495869 | 1.117982354 | 1.332409373 | 8.53E-06 |
| AL358472.3  | 4.42E-05 | 0.115429547  | 0.026660183 | 1.122355438 | 1.065214884 | 1.182561142 | 1.49E-05 |
| AC010973.2  | 6.67E-07 | 0.387708924  | 0.06563578  | 1.473600792 | 1.295718229 | 1.675903948 | 3.48E-09 |
| HOTAIRM1    | 7.06E-07 | 0.092726452  | 0.017803251 | 1.097161568 | 1.059537743 | 1.136121403 | 1.90E-07 |
| AC064836.3  | 1.57E-05 | 0.141773142  | 0.026058663 | 1.152315207 | 1.094939489 | 1.212697459 | 5.31E-08 |
| AL121782.1  | 5.31E-06 | 0.401472324  | 0.068288757 | 1.494022764 | 1.306861968 | 1.707987587 | 4.13E-09 |
| AC027373.1  | 1.55E-07 | 0.326770721  | 0.067972603 | 1.386483549 | 1.213546261 | 1.584065391 | 1.53E-06 |
| SNHG17      | 3.94E-07 | 0.132553085  | 0.021821792 | 1.141739623 | 1.093937047 | 1.191631065 | 1.24E-09 |
| AL035071.1  | 3.21E-06 | 0.048296868  | 0.010327677 | 1.049482167 | 1.028452241 | 1.070942116 | 2.92E-06 |
| AC005586.1  | 7.35E-06 | 0.077086034  | 0.014336941 | 1.080135001 | 1.050205801 | 1.110917135 | 7.58E-08 |
| AC156455.1  | 9.80E-05 | 0.048241692  | 0.008564606 | 1.049424262 | 1.03195532  | 1.067188918 | 1.77E-08 |
| AC025171.4  | 7.85E-07 | 0.083842226  | 0.01724214  | 1.087457308 | 1.051321824 | 1.124834821 | 1.16E-06 |
| AC008870.2  | 3.59E-06 | 0.226716622  | 0.041953878 | 1.254474327 | 1.155448444 | 1.361987068 | 6.52E-08 |
| DLGAP1-AS2  | 3.97E-09 | 0.182129981  | 0.019116793 | 1.199770132 | 1.155648612 | 1.245576167 | 1.62E-21 |
| EPB41L4A-DT | 6.83E-10 | -0.160609112 | 0.0243253   | 0.851624896 | 0.811974922 | 0.893211039 | 4.04E-11 |
| AC002070.1  | 1.31E-06 | -0.198186226 | 0.035681387 | 0.820217093 | 0.764815646 | 0.879631691 | 2.79E-08 |
| AP000525.1  | 4.35E-05 | 0.142501009  | 0.023924273 | 1.153154245 | 1.100330177 | 1.208514263 | 2.58E-09 |
| NALT1       | 9.12E-05 | 0.133207099  | 0.028140911 | 1.142486582 | 1.081178801 | 1.207270795 | 2.21E-06 |
| AC063919.1  | 3.78E-06 | -0.349475019 | 0.082976973 | 0.705058135 | 0.599231728 | 0.829573853 | 2.53E-05 |
| Z84485.1    | 2.40E-05 | 0.216111139  | 0.039012497 | 1.241240322 | 1.149869031 | 1.33987219  | 3.03E-08 |
| AL162377.1  | 5.59E-06 | -0.577522832 | 0.107536573 | 0.561287048 | 0.454621242 | 0.692979389 | 7.85E-08 |
| LINC01132   | 8.60E-05 | -0.529654656 | 0.112342805 | 0.588808276 | 0.472440953 | 0.733838132 | 2.42E-06 |
| MCCC1-AS1   | 3.89E-05 | 0.18202817   | 0.040714941 | 1.199647988 | 1.107636374 | 1.299303029 | 7.79E-06 |
| AC080129.2  | 3.13E-06 | 0.581579037  | 0.094039263 | 1.788860879 | 1.487750829 | 2.150913433 | 6.23E-10 |

|            |          |              |             |             |             |             |          |
|------------|----------|--------------|-------------|-------------|-------------|-------------|----------|
| SNHG4      | 8.25E-07 | 0.261468229  | 0.035446618 | 1.298835676 | 1.211663411 | 1.392279488 | 1.63E-13 |
| U91328.1   | 5.96E-05 | -0.174572934 | 0.039619747 | 0.839815601 | 0.777068937 | 0.907628924 | 1.05E-05 |
| ZKSCAN2-DT | 8.11E-05 | 0.145592751  | 0.030783279 | 1.156725017 | 1.088998681 | 1.228663347 | 2.25E-06 |
| CAHM       | 9.09E-05 | 0.195207797  | 0.03690409  | 1.215563551 | 1.130745455 | 1.306743918 | 1.23E-07 |
| AC087741.1 | 7.40E-05 | 0.159159837  | 0.037678445 | 1.172525345 | 1.089056192 | 1.262391871 | 2.40E-05 |
| AC007938.3 | 1.14E-07 | 0.352583554  | 0.067640889 | 1.422738526 | 1.246089001 | 1.624430447 | 1.86E-07 |
| AC015912.3 | 9.13E-09 | 0.152307839  | 0.022819704 | 1.164518665 | 1.113582217 | 1.217785001 | 2.48E-11 |
| AC011005.4 | 5.54E-05 | 0.155041758  | 0.037665168 | 1.167706721 | 1.084608816 | 1.257171217 | 3.85E-05 |
| U47924.3   | 1.22E-07 | 0.261372731  | 0.038892188 | 1.298711646 | 1.203393454 | 1.401579785 | 1.81E-11 |
| LINC01605  | 2.42E-06 | 0.138603255  | 0.018177388 | 1.148668282 | 1.10846506  | 1.190329645 | 2.44E-14 |
| AC020558.2 | 9.84E-05 | 0.163766989  | 0.03807404  | 1.17793981  | 1.093237242 | 1.269205021 | 1.70E-05 |
| CAPN10-DT  | 3.08E-05 | 0.231670537  | 0.049782649 | 1.260704305 | 1.143505265 | 1.389915197 | 3.26E-06 |
| AC108673.3 | 2.24E-05 | 0.066307305  | 0.011707291 | 1.068555039 | 1.04431528  | 1.093357431 | 1.48E-08 |
| AC084876.1 | 1.57E-07 | 0.512354035  | 0.074423507 | 1.669215966 | 1.442657129 | 1.931354226 | 5.81E-12 |
| AL355388.1 | 1.09E-07 | 0.365463538  | 0.053138466 | 1.441181896 | 1.298635449 | 1.599375142 | 6.09E-12 |
| AC092143.3 | 3.15E-05 | 0.392664019  | 0.074844243 | 1.480920744 | 1.278863762 | 1.714902177 | 1.55E-07 |

**Supplementary Table 5. Comparison of gene models published based on time-dependent ROC.**

| <b>Models</b>            | <b>1 years</b> | <b>3 years</b> | <b>5 years</b> | <b>P-value</b> | <b>PMID</b> |
|--------------------------|----------------|----------------|----------------|----------------|-------------|
| Our model                | 0.791          | 0.783          | 0.797          | $P < 0.001$    | –           |
| Yufu Wang et al. [15]    | 0.715          | 0.693          | 0.732          | $P < 0.001$    | 9286942     |
| Ding Wu et al. [16]      | 0.695          | 0.678          | 0.674          | $P < 0.001$    | 9448526     |
| Qianwei Xing et al. [17] | 0.724          | 0.716          | 0.714          | $P < 0.001$    | 9162755     |
| Yijun Le et al. [18]     | 0.745          | 0.762          | 0.737          | $P < 0.001$    | 10126632    |
| Lei Zhang et al. [19]    | 0.773          | 0.698          | 0.747          | $P < 0.001$    | 10433381    |
| Jiyue Wu et al. [20]     | 0.734          | 0.720          | 0.757          | $P < 0.001$    | 8237220     |
