# Supplementary material for: LASSO regression and WGCNA-based telomerase-associated lncRNA signaling predicts clear cell renal cell carcinoma prognosis and immunotherapy response
Source: Aging (Albany NY). 2024 May 30;16(11):9386–409. doi: 10.18632/aging.205871 (PMC11210217; doi:10.18632/aging.205871)
Supplement: Supplementary Table 3 [file aging-16-205871-s003.xlsx]

## Sheet: lncRNAexp
Supplementary Table 3. 1892 lncRNAs associated with differentially expressed TR.
ID	TCGA-CJ-4639-01A-02R-1325-07	TCGA-BP-4964-01A-01R-1334-07	TCGA-A3-A8OW-01A-11R-A37O-07	TCGA-BP-4983-01A-01R-1334-07	TCGA-B0-5698-01A-11R-1672-07	TCGA-BP-5186-01A-01R-1426-07	TCGA-BP-5001-01A-01R-1334-07	TCGA-CZ-5461-01A-01R-1503-07	TCGA-CZ-5456-01A-01R-1503-07	TCGA-B0-4706-01A-01R-1503-07	TCGA-A3-3328-01A-01R-0864-07	TCGA-A3-3383-01A-02R-1325-07	TCGA-B2-3924-01A-02R-1325-07	TCGA-B0-4844-01A-01R-1277-07	TCGA-B0-4718-01A-01R-1277-07	TCGA-CZ-5467-01A-01R-1503-07	TCGA-AK-3429-01A-02R-1325-07	TCGA-CJ-5672-01A-11R-1541-07	TCGA-B0-4819-01A-01R-1277-07	TCGA-BP-5187-01A-01R-1426-07	TCGA-AK-3460-01A-02R-1277-07	TCGA-DV-A4W0-01A-11R-A266-07	TCGA-B8-5550-01A-01R-1541-07	TCGA-CJ-4876-01A-01R-1305-07	TCGA-A3-3352-01A-01R-0864-07	TCGA-BP-5182-01A-01R-1426-07	TCGA-CJ-5678-01A-11R-1541-07	TCGA-B2-5639-01A-01R-1541-07	TCGA-CJ-4884-01A-01R-1305-07	TCGA-B0-4688-01A-01R-1277-07	TCGA-AK-3426-01A-02R-1325-07	TCGA-BP-4784-01A-01R-1305-07	TCGA-CW-6097-01A-11R-1672-07	TCGA-B0-4690-01A-01R-1277-07	TCGA-BP-4325-01A-02R-1289-07	TCGA-CJ-4893-01A-01R-1305-07	TCGA-BP-4799-01A-01R-1305-07	TCGA-B0-5711-01A-11R-1672-07	TCGA-BP-4797-01A-01R-1305-07	TCGA-T7-A92I-01A-11R-A37O-07	TCGA-CJ-4641-01A-02R-1325-07	TCGA-CJ-5686-01A-11R-1672-07	TCGA-B0-4834-01A-01R-1305-07	TCGA-A3-3325-01A-01R-0864-07	TCGA-B0-5702-01A-11R-1541-07	TCGA-AK-3431-01A-02R-1277-07	TCGA-BP-4758-01A-01R-1289-07	TCGA-B0-4848-01A-01R-1277-07	TCGA-CJ-4888-01A-01R-1305-07
AC034231.1	0	2.7969	6.3702	1.3929	1.1314	4.3207	1.2164	3.4486	1.6781	2.2926	6.4826	1.1773	2.9771	0.3689	1.7875	1.5108	1.6039	2.81	0.7453	5.4537	1.3139	3.4161	4.7001	2.1048	5.4452	2.5707	1.0765	1.4018	1.5591	8.3695	2.0442	2.4556	1.5308	6.0414	3.8237	1.4425	1.5228	4.4904	0.6723	6.2602	1.2154	2.9283	0.0713	0.2127	3.3615	1.227	0.1214	1.0775	0.8349
CIRBP-AS1	1.8725	1.3632	3.9719	1.2503	2.5849	2.1498	3.117	1.6988	1.2875	3.0936	2.5672	2.5903	1.6593	2.7272	2.4775	1.1112	0.741	1.2646	1.2986	1.8811	1.6187	2.0813	1.2837	3.9593	1.9839	1.2556	1.0232	1.0409	1.5436	3.6158	2.6085	1.9961	1.3778	1.2849	3.0683	1.1068	0.2513	0.9976	0.8875	3.3326	2.5511	1.4496	0.9041	3.7628	3.1378	0.3471	2.163	1.524	1.1445
PCAT7	0.5913	0.6066	1.0602	0.3885	0.0079	0.3426	0.9307	0.1301	0.3816	0.726	0.0206	0.0119	0.1304	1.5324	0.3252	0.2748	0	1.2082	0.4271	0.256	0.3187	1.3623	2.506	0.134	0.1057	0.4365	0.7931	0.6216	0.896	0.4268	0.2789	0.0235	0.405	0.0611	0.0915	1.0496	0.0058	0.9165	1.2501	0.8214	0.2985	0.8573	0	0.0064	0.1092	0.0957	0.3146	0.014	0.5725
AC136475.1	3.5882	1.6531	7.097	0.4228	2.0557	1.3242	2.2806	1.8671	0.6268	4.8569	0.1931	5.6214	2.4162	4.6895	3.7424	2.8868	0.4945	0.3271	2.2057	4.2055	2.2018	0.9721	0.6457	1.9167	2.562	1.6826	1.9913	1.2466	0.6655	1.8766	1.5513	2.2804	2.495	4.1708	3.2071	1.2828	0.5778	0.748	0.2763	6.3959	1.6949	0.9115	0.2842	2.482	1.2983	1.0975	0.9499	1.1827	0.7676
AC114488.1	1.952	1.6106	3.2229	0.4293	0.6323	1.244	1.5597	0.2778	0.1385	3.6455	0.3983	1.9874	0.5098	0.9747	1.6866	0.7128	0.1766	0.2531	0.9353	0.8134	2.6999	3.6449	0.3212	0.4171	1.2468	0.4528	0.1422	0.8102	1.4043	0.0838	1.0502	0.939	0.5515	0.6651	2.5256	0.655	0	0.5787	0.6907	1.7624	1.1239	0.7253	0.5655	1.9671	0	0.6947	0.2806	0.1017	0.2969
AC074032.1	1.8943	1.3446	3.5838	0.8928	3.2217	2.3435	2.924	2.4262	1.8151	3.5923	3.0803	4.2137	1.5903	1.8918	2.8849	1.8677	1.4779	3.6229	3.3679	1.3532	1.9651	4.6742	1.4804	2.4285	2.6527	1.689	2.1737	2.6114	3.4071	1.4631	3.1667	3.2931	0.9367	1.3984	1.6447	1.8204	1.1592	2.3694	1.1851	1.5295	3.6813	1.6278	1.5777	3.7498	25.7412	1.3484	3.1509	1.702	1.1732
AL442125.2	2.531	0.9213	2.2636	2.3858	0.559	1.4233	0.6435	0.2161	0.1347	0.6545	0.6779	0	0.425	0.316	0.164	0.6932	0.1717	0.1641	0.2872	1.3561	0.7502	1.1815	0.2082	0.676	1.5856	0.4403	0.6915	0.6753	1.0926	4.2357	1.6049	0.3321	1.0727	2.5871	0.6463	0.8107	0.2445	0.4221	0.4798	0.3955	0.9369	0.4702	0.6416	0.6377	0.3085	0.2252	0.3898	0	0.7426
AC060780.1	9.1526	5.072	7.531	2.9686	2.7983	5.5667	6.6439	1.5013	2.0387	7.5312	6.6028	2.9427	3.4779	4.6606	8.4912	2.6716	1.6912	1.5225	3.6399	3.0649	4.6224	5.8789	1.4662	5.3265	8.5741	3.0485	1.5332	1.4888	3.8945	4.7672	4.5054	3.4761	2.4499	5.2795	8.9494	2.5019	0.5973	3.3273	1.1826	6.7437	4.7178	2.9591	2.7431	7.0953	2.7739	2.1002	4.4738	1.6372	1.9393
AC124068.2	0.5724	0.6598	1.1157	1.1241	0.3371	0.912	0.7623	0.6517	0.6602	0.8223	0.511	1.837	2.0289	1.846	1.9165	0.1045	1.1002	0.9896	0.5774	1.0222	0.5655	0.4453	0.6278	1.6817	1.125	0.3319	0.7298	0.5091	0.3089	1.4737	0.3849	0.6258	1.8194	2.9796	1.0232	1.266	0.1843	0.8485	0.5787	0.3975	1.0594	0.8862	0.0691	1.6481	0.1163	0.7639	0.6171	2.087	0.4043
AC009090.6	2.0715	1.5955	1.9827	2.0234	0.6366	1.4012	1.363	0.1025	0.4795	1.5009	1.1487	0.0997	1.3106	1.0494	0.9728	0.6742	0.2851	0.3698	1.0902	0.6434	0.8453	2.3025	0.3211	1.3631	1.6263	0.9401	0.1148	0.267	1.4795	1.8551	1.1422	0.5121	0.721	3.3074	2.668	1.0578	0.2127	0.4339	0.535	2.033	2.593	1.0877	1.4024	1.9125	0	0.4808	0.4069	0.5629	1.6833
LINC02289	3.3981	1.502	4.8425	0.1287	1.0722	1.672	1.8402	1.8523	0.3876	2.3145	0.4527	3.1226	1.2226	0.5303	2.0645	4.0052	1.626	0.6098	0.7575	2.7093	3.5296	1.7401	1.4976	1.2479	3.2424	0.673	0.5305	0.4318	0.8076	1.8943	0.4897	2.687	0.8573	0.7064	0.7438	2.5824	1.2703	2.783	0.6212	1.3118	0.8236	1.7193	0.7801	2.3587	0.8135	4.6971	1.3738	0.9482	1.1671
AL161669.1	11.2375	1.6961	12.2562	1.6794	2.1794	6.4733	2.7873	2.1063	2.1886	6.1426	0.1049	0.728	2.9146	2.2241	2.842	2.1018	0	3.3762	0.7258	1.4685	5.4835	3.2901	0.4509	1.9033	5.5552	1.3113	1.3479	0.2438	3.2536	0	0.474	0.1798	0.5808	2.6459	8.9591	1.1288	0.5296	5.1804	0.7274	0.5711	5.7491	0.1273	0	12.3307	0	0.7316	2.5328	1.499	0.7148
AC078922.1	1.2189	0.4437	1.0062	0	0.6461	2.3304	0.9739	0.1041	0	2.1013	0.2798	0.1619	0.2729	0.1522	0.6319	0	0	0.158	1.0144	1.9591	1.6257	2.7637	0.2005	0.9115	1.8865	0.5301	0.2664	0.8672	0.7892	0.1569	0.281	0	0	0	2.4901	0.5578	0	0.1355	0.5546	0.3809	2.707	1.5852	0.5297	0.5264	0	0	0	0	0.0795
AL138976.2	3.0489	3.607	2.3072	1.5089	2.357	3.1718	4.0418	1.4969	1.3796	3.8107	1.8081	5.7697	2.4743	4.4723	5.236	2.5051	1.3444	1.8778	2.1337	3.6755	5.0831	1.83	2.6336	1.9544	5.674	1.8565	1.3328	4.2031	1.2064	8.5367	4.0423	3.3002	2.369	5.7135	1.7908	1.5347	1.2765	3.1356	0.5202	4.2087	2.2571	0.8497	0.3312	10.5892	1.8579	4.0691	2.4418	3.0968	1.8387
AC025171.1	7.4605	3.8949	5.3013	3.3543	1.6262	3.4639	1.8628	6.5275	1.9466	2.9615	4.9108	6.9906	3.1728	1.5472	2.8945	3.7236	2.2642	3.0071	2.9614	3.3967	3.1095	4.5335	2.6245	1.5338	3.6537	2.9567	1.8237	6.2424	2.3482	10.931	1.9522	3.574	3.7617	3.4004	2.9205	3.5487	0.8457	5.7844	1.5911	3.4388	3.5731	3.2829	1.7596	2.9766	2.7217	3.4281	2.5173	7.4396	2.9439
AC006064.3	5.7667	4.1176	9.6129	2.2998	1.3717	3.617	5.0749	0.8522	2.0072	4.684	0.9335	1.3254	1.9861	5.6762	4.7433	3.2802	0.6019	1.0066	2.1814	0.9903	4.9304	2.5146	1.6421	4.7391	5.231	2.7976	0.2424	1.9726	2.4733	4.4256	4.4748	1.746	0.7833	6.8013	8.1562	1.9284	0.0714	1.7262	1.0932	0.6932	4.926	3.7088	0.0803	5.0291	0	0	0.8198	1.5596	1.7352
AL050341.2	13.7309	7.0226	21.6319	6.2452	5.2164	12.1611	10.2233	6.4777	3.6913	15.6824	12.4247	8.6158	8.0691	9.7278	7.9196	10.4545	11.9232	7.7002	10.4663	8.4602	10.8357	21.1529	9.8272	7.1513	13.2319	7.1665	4.6892	5.8618	7.4336	34.9546	15.1178	12.3405	5.189	13.0606	12.3428	9.0479	3.6263	9.9612	4.243	20.8137	14.9937	11.0017	3.9779	12.5277	4.2672	9.4682	4.5891	6.2223	4.5879
AC004817.3	0.3479	0.2352	0.4102	0.3747	0.1756	0.1956	0.1263	0.4031	0.2381	0.1928	0	0.33	0.1669	3.443	0.2576	0.1633	0	0.2255	0.6767	0.5325	0.6996	0.0994	0.0409	0.1327	0.7874	0.0865	0.0272	0.442	0.2145	177.424	0.2292	0.0978	0.1053	0.8184	0.1015	0.0455	0.4001	0.0829	0.0565	0.0259	0.3679	0.0462	0	0.7154	0	0.3979	0.0612	0.1941	0.3402
AL162458.1	2.7509	1.1908	2.8131	4.0648	0.3011	0.864	2.4257	0.1693	0.4552	2.0935	2.3184	1.1354	0.7975	1.9646	2.1762	0.414	0.2102	0.4981	2.0953	0.4758	1.1569	0.7107	0.5097	1.1981	2.5389	0.7006	0.562	0.3086	1.1589	4.5622	2.8	0.4064	0.744	3.1243	2.329	0.7995	0.1796	0.4409	0.3242	5.0927	2.3239	0.5756	0.8167	2.8141	0.4077	0.2536	0.6069	0.8423	1.4703
AC026992.2	3.2053	1.8811	2.8501	0.0308	0.9247	1.3733	1.6472	0.4655	0.1161	1.5694	5.7982	1.8532	1.3668	1.5924	2.7272	0.7166	0.5621	1.2864	0.1402	1.7524	2.3266	0.7562	0.1794	1.7355	3.7766	0.9104	0.9889	0.64	1.0824	0.1263	0.2262	0.3719	0.2156	0.1857	4.811	1.1774	0.0913	2.3637	0.4795	8.5186	0.834	1.4989	4.9114	2.4799	1.0364	0.2134	0.4702	0.3578	0.7321
Z93930.2	2.9508	2.1483	2.8717	1.3568	2.3527	1.6593	3.1628	1.8436	1.341	2.5745	3.0841	4.0142	3.3433	2.7403	7.5558	1.7346	2.9783	4.0127	3.3487	1.928	2.6664	2.1599	1.3025	5.2285	4.4292	1.2521	2.5562	1.8563	1.9158	3.9839	3.6508	2.5495	1.1184	3.147	2.7936	3.7215	0.8808	1.6004	1.0369	3.1116	2.664	2.3066	1.8244	3.186	10.6132	2.3693	2.1282	1.6869	1.9942
AL158196.1	0	0.6212	0.1677	0.6894	1.2922	0.4112	1.328	0	0	2.9418	1.6788	0.9712	0.955	1.0651	0.9479	0.1335	0	0.4741	0.4611	0	0.5419	2.7637	0	1.5626	1.8865	0.3181	0	0	0.6138	0.3138	1.2647	0	0	0.5537	1.8676	0	0.0785	0.271	0.1849	0.5079	0.7519	0.1132	0.6179	1.0528	0.8913	0.6507	1.652	0.3809	0.3179
LINC00885	0.18	0.0328	0.031	0.0424	0.0398	0.0506	0.7682	0	0	0.1552	8.1956	0.1494	0.0756	0.0281	0.2916	0	0.1221	0.0583	0.1873	0.3215	0.0333	0	0.037	0.0962	0.0166	0.0979	0.0246	0.04	0.1133	0.1159	0.2853	1.417	0.0636	0.0256	0.3218	0.2677	0	0	0.0512	0.0469	0.1943	0.0418	0.3259	0.0162	0.3291	0.1602	0.0693	0.0703	0.0147
AP000355.1	11.0205	10.5907	18.0442	0.3117	1.3631	8.1803	8.5655	0.1882	1.5253	6.3646	0	0.7318	3.5774	9.0801	2.2854	1.0866	1.1962	1.1432	0.8338	1.5745	5.5529	12.3472	1.4505	5.0627	18.519	2.9718	0.4817	0.196	9.3557	0	0.2541	0	0.3114	0.2503	9.5686	3.1267	0.213	4.1659	3.7606	0.3444	4.3513	5.5284	0.3991	5.3149	0	0.3922	2.3084	2.5831	1.5807
AC002401.4	0.9073	0.4624	0.6242	0.2566	8.6577	0.7143	0.5273	0.0775	0.1932	1.1732	0.2777	0.964	0.3047	2.9451	0.1176	0.0994	2.216	5.1766	7.2766	1.2964	0.2689	1.5733	0.7464	2.4234	0.3344	2.3678	1.5865	1.614	1.175	3.2705	4.0797	1.0714	5.6401	0.5153	0.5561	0.3322	0.0584	0.4035	2.5458	0.6617	21.1593	1.6015	0.1971	0.5878	4.8655	0.1615	1.3416	1.2761	1.1831
LINC02185	1.2041	0.4761	1.3425	0.4403	0.8071	0.2919	0.4222	0.4343	0.1437	0.4832	22.392	0.3308	0.5112	0.5961	0.5516	0.7164	0.2113	0.4845	0.534	0.5376	0.523	0.4569	0.5807	0.7208	0.9716	0.3702	0.2496	0.24	0.5825	0.5479	0.6103	0.7899	0.6159	0.4126	0.3393	1.121	0.3143	1.7081	0.1968	0.3352	0.6404	0.5304	1.2254	0.3362	0.1771	1.5886	0.6715	0.6326	0.4399
LINC00467	5.1359	2.8237	4.4349	1.7526	2.8814	3.9508	1.9317	1.3599	1.4603	3.514	5.7435	3.5519	4.4098	4.8705	1.8568	2.4042	3.0706	2.6578	1.7583	2.2455	3.1281	5.6611	4.4507	3.4761	4.4761	1.9156	3.3809	2.5076	3.0919	4.9538	2.0381	2.4794	2.0346	6.6292	3.2225	3.3544	0.8295	3.3804	2.7794	4.9378	3.695	3.8792	1.0707	2.8851	5.4234	2.2238	2.1641	4.2747	1.9325
AC092117.1	4.1016	1.102	3.0233	0.8285	0.4602	2.1417	1.1232	0.4169	0.3293	2.3851	1.7312	0.7998	1.4393	0.8534	1.0548	1.2838	0.1546	2.216	0.7512	0.5232	1.2543	3.213	0.6695	2.0345	1.7874	0.4531	0.9427	0.7528	0.2576	1.2362	1.6325	1.5803	0.5749	3.6047	1.2137	1.3854	0.0419	0.4343	0.1234	7.1389	1.6669	0.8165	0.165	1.3825	3.6499	1.0717	1.9954	0.7376	0.3502
AC092171.4	1.5066	0.914	3.9156	2.1303	0.2958	0.4707	4.0127	0.2859	0.1782	4.1846	2.8822	3.5569	0.3748	1.6718	3.6885	0.6419	0	0.7597	0.8232	0.1495	1.7366	1.3397	0.1377	1.4307	4.3799	0.2184	1.0062	0.4467	1.9872	3.1247	2.5089	0.4393	0.2365	4.658	3.8474	0.5362	0.0539	0.1861	0.3173	1.5696	1.9622	0.5443	0.4243	2.3497	0	0.2979	1.186	0.5232	0.8731
AC025171.5	0.92	1.4651	1.5822	1.3008	0.3556	0.9053	2.0883	0.8346	0.2449	1.2886	0.44	8.0939	0.901	1.0049	2.3102	1.4488	0.8581	0.5964	1.8706	0.8215	0.9373	1.1504	0.8514	0.9214	1.3561	0.5502	2.2621	2.4546	1.1996	8.8823	2.1212	0.2263	0.4874	0.9142	1.2334	1.2103	0.2593	1.3425	0.5232	0.3594	1.7027	1.3888	0.1666	1.0761	0	1.4324	1.0273	1.3477	1.3495
LINC02019	1.5407	0.9161	1.2719	1.4766	0.9529	0.953	1.7534	0.6139	0.3554	1.6158	0.6091	2.3871	0.6036	0.4809	1.6308	0.6752	0.6271	0.6659	1.8456	1.3758	0.8753	3.288	0.3802	1.9752	1.6466	0.7148	0.9261	0.4111	1.3671	0.8595	2.25	0.5054	0.4353	1.3999	1.705	0.611	0.9428	0.6281	0.3894	2.0332	2.4397	1.0258	0.2604	2.0702	0.1878	1.5536	0.5853	0.5618	0.5859
IGFL2-AS1	0.0951	0.1154	0	0.4634	0.014	0	0.1152	0.0406	0.1013	2.515	0.0121	0.0842	0.0177	0.1584	0.1439	0.0695	0	0.3495	0.3599	0.4814	0.1175	1.0575	0.0261	0.0339	0	0.1241	0	0	0.0114	0.0817	0.2194	0.0624	0.0224	0.072	0.0648	0.0145	0	0.0176	0.012	0	0.0587	0	0.0115	0.2739	0	0	0	0.0248	0.0103
TP53TG1	2.3066	1.6465	1.9339	1.3759	3.2956	2.0469	2.8208	2.685	2.638	2.6484	2.9165	4.846	3.3484	2.6208	2.6509	1.4609	5.4645	5.3273	1.7519	2.4942	2.0563	1.8988	4.6845	3.7734	2.3309	1.3873	5.4353	6.6352	2.3531	4.1524	3.2617	2.9199	2.9022	3.203	3.9116	2.6965	2.2518	2.4142	1.8174	2.5344	2.1345	2.7956	1.0637	2.5035	31.8224	2.6134	2.1648	3.1397	1.9855
AC008735.2	11.8809	8.3751	14.1415	25.332	3.4156	5.6206	26.7122	1.3687	2.9114	13.8173	10.3181	2.1287	3.9052	8.4754	17.2322	1.5495	0.8956	1.5894	9.6307	3.0312	6.0088	19.2424	0.6206	17.8306	14.9417	0.9843	0.3091	0.5032	8.5476	11.2889	10.3273	1.3609	3.7299	7.8177	16.3742	3.8834	1.7614	2.5161	1.9306	6.68	12.7979	4.0294	3.6195	25.8599	0	0.3356	4.4149	1.7681	7.6229
AF129075.1	2.6649	1.8431	2.6583	1.3816	1.8247	2.098	1.839	1.0809	0.2128	1.7802	1.0706	0.8847	1.1932	1.9129	2.0724	0.8758	0.9039	0.8638	1.4113	1.1898	1.3823	4.7096	0.6577	2.3488	2.2587	0.8113	1.0921	0.711	1.9172	2.1441	0.9985	1.3986	0.4706	1.9673	2.586	2.256	0.1717	1.4074	0.7073	1.3882	2.9593	0.6189	0.579	2.7335	0	0.3557	1.3955	1.3534	1.998
AC096677.1	2.0936	1.0669	1.6323	2.8616	0.7091	1.4912	0.9125	0.5959	1.5975	1.2332	2.3764	1.8999	1.0546	3.3977	1.8543	0.5734	0.5681	2.0812	2.7719	1.0594	1.2411	2.0478	3.2723	2.5349	1.9288	1.1231	1.2965	1.3034	1.5062	7.0074	4.3849	2.4722	2.5634	5.7463	0.7485	1.3093	0.5844	1.319	2.9635	2.0357	5.5109	5.0892	3.7908	1.2056	5.018	0.3726	0.7309	3.1624	2.9801
AC136475.9	0.4257	1.8597	2.7825	0.2007	0.3761	0.2394	1.1597	0.1818	2.1531	3.3028	0.3258	8.6221	1.6679	0.5315	0.2759	1.749	0.4332	0.414	0.9663	0.5703	2.8392	1.8455	0	0.6823	2.0396	0.0926	0	0.7573	0.3829	1.6442	1.8406	0.2793	0.7518	0.8462	1.957	0.2922	1.0284	0.4733	0.2421	0.3327	0.394	0.3955	0	2.4516	0	3.0304	0.5246	0.6653	0.6939
AL451165.2	3.247	3.6936	5.2121	2.3593	3.7651	4.4886	7.1739	4.9096	2.7368	7.1719	13.3549	10.8697	3.6345	3.1245	4.9098	4.4464	5.0479	8.5956	4.1966	7.611	4.8119	3.3383	2.3372	6.2151	6.0326	3.7071	5.1008	8.3025	2.3847	8.0115	5.3811	4.2601	2.198	5.6852	4.8369	4.9527	3.8344	2.8579	2.6161	6.2016	5.926	4.2103	2.4496	7.2064	8.244	7.8243	6.001	4.968	3.4399
ELN-AS1	0.5966	0.9411	1.6417	0.1875	0.9663	1.6774	0.5056	1.1037	0.8469	0.8571	4.9457	3.3012	0.6678	2.7309	0.2578	1.3072	0.5396	3.0943	2.0311	1.0655	1.3262	1.5915	0.6544	0.7436	1.6855	1.5569	2.1733	0.1769	1.7169	10.4962	2.522	2.6092	1.5452	2.2586	2.4377	2.093	0.1281	0.995	0.754	11.8093	1.4722	3.3253	0.7201	1.6462	1.4542	2.6541	0.3063	1.0876	0.3241
AC090825.1	1.8922	1.5223	2.6412	1.3442	0.8056	0.8019	0.8167	1.0186	1.3576	1.7847	0.0367	1.1927	2.9314	0.4108	1.2085	0.9163	1.1069	0.4978	0.6691	2.2406	2.0015	1.0516	0.282	2.1899	1.8796	0.2147	0.6893	0.6707	0.8138	0.6619	1.1144	1.9968	0.5133	1.3314	2.1709	0.8094	0.1943	3.2394	0.759	2.4641	2.0809	0.7515	1.5343	1.6088	0.2674	2.1593	0.5617	0.707	1.0235
AC068987.2	0.8841	0.8224	1.7233	0.2778	0.4122	1.2429	1.213	0.3145	0.2353	0.4022	0.0188	0	0.3024	0.6745	0.3183	0.4574	0.0666	0.2547	0.3159	0.7895	0.5459	0.7206	0.3232	1.3381	0.9774	0.6195	0.1074	0.3058	0.9717	1.2646	0.8494	0.0967	0.3816	0.7531	1.455	0.4945	0.0158	0.2457	0.6518	1.2537	0.6666	0.3878	0.0178	0.9899	0	0.2622	0.2723	0.3454	0.3682
AC079414.3	3.0089	2.6852	6.4103	2.9735	1.1148	2.9474	5.6403	1.699	2.5318	6.3585	3.4537	4.3825	1.7383	2.7263	6.9191	1.7013	2.3046	0.9439	2.2397	1.4734	2.3015	5.0489	0.7186	3.733	5.1149	2.9973	2.0684	1.0359	3.4217	2.0617	4.3082	2.1649	1.6455	3.9134	5.0069	2.6649	0.719	1.1871	0.8832	1.3651	2.9341	1.8935	0.9842	3.0741	2.839	2.3317	3.9465	4.7776	3.3855
TMCC1-AS1	2.5687	2.3801	1.8805	0.9711	0.9284	2.0933	1.1025	0.9383	0.9506	3.4988	0.1051	1.9063	2.2141	1.8177	2.0919	1.1136	1.2207	1.0597	0.7483	0.9935	1.1705	2.3818	1.5255	1.5335	4.7684	0.7946	1.4486	1.124	1.6108	1.7595	1.1719	0.9372	2.8332	3.2294	2.8975	1.2257	0.3849	2.5275	1.1822	1.1949	1.8813	2.0991	0.2288	1.7501	0.5022	1.6622	0.3258	0.9981	0.7702
AC108860.2	0	0.0176	0.0333	0.0228	0.0214	0.0818	0.1056	0.0414	0	0.188	6.6754	0.0322	0	0.0303	0	0	0.0329	0.1257	0.2017	0.0433	0.1077	0.0323	0.1196	0	0.0179	0.0632	0.0265	0.1724	0.0872	0.0936	0.1117	0.8584	0	0.0826	0	0.3105	0.0624	0.0269	0.2021	0	0.0299	0.0225	0.0176	0	1.1813	0.0431	0.0448	0.2272	0.0158
OSMR-AS1	1.0658	0.9264	1.1223	0.9637	1.4989	0.636	0.2686	0.8172	0.4979	2.0343	0.3495	0.7221	0.8521	0.6924	1.0431	1.251	0.2951	0.3384	0.6171	1.7286	1.1765	3.9165	0.5189	0.6042	1.0661	0.4919	0.2139	0.7351	0.4303	1.33	0.7272	0.4851	0.3841	0.9511	0.7554	0.4678	0.9177	0.8706	0.2392	0.4079	1.5968	0.8689	0.3702	1.2056	0.1856	1.1031	0.1139	0.5268	0.312
TMPO-AS1	2.3952	1.629	1.8862	3.4758	0.7796	0.9924	0.9729	1.7895	2.7682	2.6486	6.0531	2.6995	1.6933	1.377	1.0825	0.8113	1.0904	1.1646	1.0372	1.5197	1.261	1.24	1.7889	1.5825	2.0789	1.0692	2.1698	1.7098	1.2584	11.3191	1.8712	1.3025	1.8254	5.5479	2.511	1.0239	0.5583	1.2964	1.0157	1.1984	2.5276	1.2296	1.3124	2.7449	0.9986	0.9534	0.8446	2.3146	1.654
FOXCUT	0.1812	0.1484	0.3117	0.0854	0.04	0.2038	0.0165	0.1934	0.1206	0.2929	0.0347	0.0301	0.1268	0.0283	0.0881	0.0993	0.3074	0.4406	1.0627	0.2023	0.0671	0.6043	0.41	0.0726	0.1002	0.335	0.2971	0.403	0.2119	1.7207	0.6268	0.327	0.096	0.8748	0.1157	0.3732	0.0438	0.0504	0.1203	0.5664	0.2795	1.8099	0.0164	0.0978	3.1475	0.3225	0.321	1.1328	0.576
C9orf139	0.6148	0.3473	0.6709	2.3383	0.2341	0.4769	1.001	0.2806	0.2032	0.996	0.1298	1.0277	0.3916	0.397	0.5084	0.151	0.2445	0.4536	1.203	0.2461	0.487	0.198	0.157	0.3171	1.0157	0.3689	0.1969	0.264	0.8466	1.0235	1.5399	0.1808	0.3744	1.1077	1.137	0.4366	0.0341	0.165	0.1367	0.5743	1.5434	0.3053	0.0614	1.404	0.9819	0.1509	0.3069	0.3313	0.546
SEMA3F-AS1	1.148	0.7444	1.3081	1.0653	0.4596	0.6052	1.759	0.1685	0.0764	0.8813	1.4138	1.1911	0.7831	0.3807	1.0695	0.452	0.2921	0.4884	0.8957	0.4165	0.638	0.4785	0.4132	0.7857	1.6526	0.4993	0.3332	0.1914	0.9292	1.3624	0.9513	0.8002	0.4561	0.9779	1.4475	1.0671	0.2426	0.5584	0.272	1.1399	1.2394	0.4166	0.8704	2.35	0	0.1596	0.5083	0.5045	0.959
AC017048.3	3.7738	5.637	3.1333	5.704	2.2994	4.0979	2.5522	3.2223	4.9877	15.9843	0	6.6533	2.3306	5.4422	9.5295	1.8533	0.8828	4.1339	1.1814	1.8592	3.7606	3.211	0.8564	5.8391	5.5628	0.1698	4.1241	1.2731	0.3745	5.1094	2.2504	3.1586	0.2758	12.3409	3.4561	2.4415	4.694	2.2426	0.6414	0.0678	0.1606	1.8133	0.0942	8.1962	0	3.5893	1.2025	2.0335	0.3818
AC124319.1	0.8101	1.2975	0.3344	2.0618	0.1431	0.1822	3.8836	0.0692	0.0862	1.3965	0.9918	0.4303	0.272	0.809	2.6249	0.355	0.1099	0.4202	3.4934	0.434	0.4802	0.4322	0	1.4713	2.7464	0.2819	0.2656	0.2882	2.7975	1.2514	1.3075	0.4251	0.1144	1.4721	1.324	0.9638	0.3131	0.3603	0.7371	0.2532	2.9986	0.4515	0.352	2.3324	0	0.2883	1.597	0.8861	1.0035
AC006017.1	3.144	1.3734	0.4326	2.7414	0.2778	0.5304	0.7993	0.1342	0.1674	1.0163	0.7819	0.9394	0.3519	1.1775	2.3431	0.5166	0.6399	0.8153	2.7949	0.1404	1.7473	0.629	0.5173	1.9314	1.3324	0.4102	0.2577	0.1398	2.375	0.5059	0.5437	0.1031	1.9988	1.7854	4.7371	0.8632	0.2025	0.0874	0.4172	0.4913	3.7823	0.8032	0.7401	1.1316	0	0.9791	0.7748	0.8598	0.8199
AL136295.6	4.502	3.3361	5.42	3.4102	2.0598	2.3508	6.9491	0.961	0.3424	5.6823	5.6596	5.6583	2.5197	5.018	11.4617	2.9063	1.418	2.5017	3.9534	1.4358	3.9316	4.1819	1.1904	3.6932	6.4584	2.3077	2.8992	0.858	1.8508	13.2469	5.0976	1.6876	0.4543	3.5609	5.2557	2.2808	0.8803	1.4301	0.5487	7.2866	2.7774	1.1202	3.6682	4.6873	22.5345	1.4306	3.8631	2.3868	3.0923
H19	9.8237	14.2641	6.0297	2.0483	25.5376	12.0957	12.7861	7.0629	2.469	16.2903	6.9025	94.4003	6.7244	42.718	1.7277	4.5609	2.3536	9.3757	5.5121	13.9247	23.0553	21.9435	14.12	4.9745	4.3334	16.6779	4.1705	5.6191	17.3274	3.1733	8.5258	2062.52	27.4987	53.5046	10.1653	2.3229	76.3805	16.7689	7.7124	30.0375	12.3915	8.4983	6.4933	19.8206	0.4896	146.933	9.3481	6.5911	5.4404
AC006001.2	2.9629	2.3872	1.8481	3.724	3.5078	1.1774	3.1853	0.8771	1.346	1.4132	3.809	1.9411	4.2894	2.4906	3.021	2.3587	1.8224	0.8708	1.7485	0.4939	2.9273	2.3185	0.6825	1.4772	2.0527	1.1684	1.5111	2.3893	0.6537	1.424	2.1179	0.7257	5.1347	5.2047	7.9297	0.8677	0.738	1.713	0.9287	3.1691	2.2423	1.2845	2.5179	2.9006	3.0332	0.3867	0.5841	1.7285	1.3393
ATP6V0E2-AS1	0.9323	1.4628	1.2827	0.697	0.4828	0.6689	0.5721	1.0568	0.4963	0.8452	11.5987	0.5977	1.7272	0.7023	0.8333	0.3698	1.5484	0.7711	1.435	0.2871	1.0481	1.5865	7.4841	0.9616	1.2202	0.6292	0.6324	0.5432	0.4741	3.4763	1.7975	0.6748	1.4987	1.2961	1.3956	0.9562	0.3831	0.6255	1.5114	4.7223	1.5866	1.0154	4.6682	0.5438	1.2929	0.6293	0.6437	0.7535	1.7815
AC004076.2	1.4964	0.4752	1.6427	0.5102	0.5063	0.8773	1.0985	0.4214	0.4068	1.1389	0.7309	0.296	0.2673	1.1328	1.0935	0.1395	0.3888	0.3303	0.9153	0.3412	0.9672	0.9342	0.5762	1.0884	0.8799	0.2631	0.2783	0.1416	0.7444	0.9017	0.5322	0.6683	0.6522	1.1209	0.9594	0.7576	0.1743	0.7964	0.4829	1.2936	1.3356	0.5472	0.3113	0.9282	0.1164	0.3399	0.6375	0.4229	0.6227
AC009120.2	6.4434	3.1185	6.425	2.8663	1.226	4.0983	5.7847	0.34	0.9378	5.9389	4.4135	1.346	2.1205	5.227	7.8509	1.2558	0.7203	1.6741	4.1445	1.8748	3.63	5.665	1.0323	8.5596	7.9149	1.4485	0.4483	0.9015	5.0436	4.6289	5.8009	0.7757	1.3467	4.5223	7.1734	2.7718	0.6062	1.6233	1.162	7.0144	7.5036	3.0041	3.8452	6.6965	0.3823	0.6441	1.6057	1.5461	4.366
INE1	7.6129	6.1537	5.6224	6.8068	2.4233	4.281	7.4409	1.3861	1.6687	6.7551	8.7811	0.892	1.7544	4.8917	7.8357	2.085	1.2911	1.4516	6.3526	1.9994	3.2353	4.853	1.2894	5.9803	6.8073	2.4347	0.5506	1.2944	7.5712	17.799	2.3878	2.7174	2.1352	4.4503	8.4054	2.8177	1.0456	1.6181	2.4195	6.24	8.0119	2.4441	3.5677	7.8572	0.1364	0.7969	2.0691	2.0118	3.6495
AC008443.3	0.232	0.4223	1.5961	0.5468	0.205	0.6523	0.1685	0.0991	0.1235	0.4	2.308	0.9243	0.1299	0	0.4511	0.5083	0	0.1504	0.3511	0.2072	0.6877	0.3095	0	0.1239	2.736	0.2018	0.3803	0	0.0835	0	0	0.1522	0	0.2635	0.474	0.2123	0	0.129	0	0.3626	0	0	0	0.668	0	0	0.5003	0	0
AC005674.1	2.5017	1.6129	4.5204	2.0457	0.972	2.1187	8.09	0.3217	0.2246	2.8839	2.9754	2.0414	1.8219	1.3734	3.0472	0.6274	0.6543	0.3713	3.147	0.5383	1.8537	2.6936	0.4711	4.0091	3.1768	1.1668	0.5929	0.2681	2.6998	3.0071	2.8495	1.0084	0.7878	1.4207	2.5555	0.8965	0.2524	0.5697	0.7085	1.6643	3.3099	0.784	0.6658	8.2121	0.2204	0.295	0.947	0.4239	1.1889
LINC01126	2.3782	4.5858	2.3436	1.7571	0.3691	1.4458	0.9338	2.4697	0.7185	9.0031	0.8607	2.262	1.1871	0.5617	4.1237	1.5139	0.5669	0.375	1.5561	0.7461	1.8098	1.9289	0.4759	3.8797	5.8268	0.6709	0.7375	1.0861	1.1329	0.8688	1.8525	0.4638	0.3178	2.336	5.5151	0.5588	0.207	0.9647	0.3899	1.1049	2.8947	0.7762	0.256	5.7602	0.705	0.8578	0.396	1.2555	0.9428
AL022328.3	3.7395	1.9851	4.5021	4.2594	1.7896	2.2781	3.452	0.6652	0.4147	3.2905	1.6096	2.1726	1.2209	2.2369	2.4234	3.0725	0.6342	0.303	5.7762	0.8348	1.3854	3.1173	1.41	3.4125	3.0432	0.8132	1.1068	0.2772	1.9057	5.4157	4.7603	2.2487	0.5503	4.2471	4.2973	1.3547	0.7025	1.4725	0.6498	2.6784	3.6528	1.5922	0.7899	4.5423	7.7856	1.2477	1.7278	1.0956	2.3364
AC011462.4	11.5457	6.1756	5.3493	6.1081	0.8327	1.59	14.2915	0.503	0.7526	11.577	5.5895	10.7954	2.6375	4.7065	18.782	1.5488	0.9591	1.0693	7.9329	0.8416	3.6665	4.2428	0.7753	9.5658	9.6383	0.8199	3.7338	0.4191	3.4752	7.2799	14.3975	1.2366	1.6644	7.4931	10.1089	1.9408	0.8348	0.6549	0.9827	4.0504	4.0702	3.1739	2.7305	13.3143	6.6048	2.3061	1.3065	1.2887	2.4579
AC021321.1	1.5209	0.6228	1.5041	1.4336	0.3359	0.4811	0.9321	0.487	0.253	1.3519	3.3823	0.3787	0.4256	1.1273	0.4928	0.2603	0.5159	0.2465	0.827	0.4244	0.493	0.4437	0.4692	0.8632	0.7006	0.4961	0.831	0.4227	0.8548	3.671	1.0411	1.2471	0.7386	1.9432	1.1166	0.696	0.1225	0.4756	0.2883	1.8816	1.4074	0.5298	1.0671	2.1211	0.6951	0.2537	0.3806	0.5199	0.7127
AC004817.2	0.1625	0.1183	0.559	0.5362	0.1436	0.8225	0.2951	0	0	0.1401	0	0.1079	0	0.1014	0.316	0	0	0	0.0615	0.4354	0	0.1084	0	0	0.1198	0.2827	0	0	0.1169	146.551	0.1874	0.1066	0.1148	0	0.166	0	0.8374	0.0903	0	0.254	0	0	0	0.2925	0	0	0.2002	0.6349	0.106
AC095057.3	1.7374	1.4979	4.3406	1.8532	1.4138	1.4398	3.9853	0.6246	0.1947	4.5321	0.9096	1.5786	1.5353	1.7123	5.3925	1.4024	0.6824	0.6521	5.7074	2.0413	2.5747	3.354	1.0531	4.5426	2.7295	0.4375	2.3483	0.7319	2.467	2.7663	5.6927	1.1997	0.5167	1.5059	2.4752	1.0042	0.1178	1.6775	0.7627	1.7147	2.3129	1.7414	0.5298	2.8961	1.8945	2.1153	1.2393	0.643	1.4904
AC004034.1	1.2447	0.9062	0.5708	0.9777	0.1833	0.4666	0.8288	0.0886	0.2209	1.1623	0.8731	1.7906	0	0.1295	1.7477	0.7954	0.1407	0.269	1.6479	0.5557	0.7686	0.6917	0	0.9973	1.5289	0.4511	0	0	1.7163	0.4006	0.9566	0.1361	0.1465	0.4712	1.2714	1.0442	0.0668	0.1153	0.0787	0.6484	0.7679	0.4818	1.0517	1.3439	0	0.3691	0.3195	0.3242	0.4057
LINC01058	2.5977	1.6333	1.4622	2.7826	0.7302	1.328	0.6004	0.7058	1.2571	0.7125	0.1807	0.1568	1.586	1.3266	1.8365	2.4577	0.4806	0.1531	0.1787	1.687	1.3999	0.315	0.7771	0.7569	3.9161	1.5407	0.129	1.6803	0.1699	1.064	0.6806	1.2394	0.6672	2.548	2.7741	2.1613	0	1.3128	0.3582	2.3373	1.894	0.7678	0.2566	2.0398	0	0.6303	0.2182	0.738	0.6158
LINC00622	4.5823	5.6418	5.563	1.2069	3.0066	6.404	9.5449	1.8125	0.574	7.3769	0.4383	2.9979	1.4332	2.019	1.6158	2.067	1.0057	1.5291	1.6314	3.2494	2.3468	6.0219	3.3261	4.2115	9.2875	1.4948	5.1549	4.3152	2.3513	2.1253	1.0876	2.3871	0.8092	0.9949	3.0975	4.8104	1.2588	5.207	5.6976	11.2677	3.4921	2.7544	0.7565	4.3655	0	1.6188	3.7986	1.8427	1.1642
AL512770.1	1.391	1.1047	1.0439	1.4105	0.3724	0.877	2.036	0.144	0.0224	1.199	0.6451	0.4198	0.5898	1.1839	1.0653	0.3001	0.143	0.2733	1.3553	0.6022	1.0307	0.8152	0.1734	0.9907	1.3514	0.6233	0.1843	0.075	1.0159	3.0929	0.5588	0.4424	0.3573	1.6037	1.8514	0.5786	0.2579	0.1406	0.6233	0.8124	1.7682	0.6265	0.7632	1.7142	0	0.45	0.5972	0.1976	1.1816
LINC00487	0.4324	0.2099	1.3221	0.1585	0.2122	0.2161	0.4537	0.1231	0.179	1.2631	0.0919	0.638	0.1882	0.2699	1.2455	0.8948	0.2933	0.1557	0.7088	0.6865	0.356	1.7623	0.5929	0.6416	1.3456	0.0627	0.2363	0.2137	0.3629	0.1546	0.3047	0.2206	0.1358	0.4093	0.1472	0.5716	0.2476	0.1603	0.1457	0.2753	0.2371	0.424	0.2958	0.4323	0.7612	1.0687	0.3256	0.2252	0.3759
AL035661.1	0.9248	0.202	0.3817	0.4795	0.1226	0.104	0.2687	0.0395	0.1477	5.0619	164.215	0.1228	1.8633	0.4041	1.4983	0.0507	1.192	0.2998	2.4139	0.4129	1.6446	0.0617	0.0761	0.8892	0.1022	0.2011	0.2527	1.974	0.2661	0.2976	1.0662	57.5129	0.7186	2.3632	0.3306	1.1003	0.1787	0.3085	0.526	0.289	0.6276	0.1289	0.8372	0.1997	26.148	1.9748	0.6837	0.7948	0.5426
AC092807.2	3.0476	1.1094	2.3962	0.4104	3.0772	2.2034	2.8463	0.5576	0.9271	1.8764	0.3332	3.18	0	1.6306	2.8215	3.1002	0.2954	0.2823	0.3294	1.9439	0.9678	1.4518	0	0.6977	1.6044	0.7574	0.4758	0.3872	0.3132	1.1209	1.2548	1.9993	0	0.4945	1.3342	1.3946	0.5609	2.1783	0.3301	0.9072	0.8058	0.8089	0	2.8205	0	0.7747	2.414	0	0
AL049838.1	0.8628	0.9422	2.2258	1.2707	0.524	2.0619	1.2142	1.4734	0.5741	1.255	4.9103	0.5013	0.3622	0.4712	2.7956	0.7089	0.8779	1.9577	4.6508	2.8891	0.5594	3.0207	2.839	4.2054	0.9141	2.486	0.9429	1.9183	1.0862	4.3038	0.4973	5.2354	1.5236	2.2047	0.2203	0.9377	0.1389	1.259	1.7174	1.1797	3.3932	4.1076	8.7481	1.3973	3.023	3.4544	2.6244	2.1908	1.2304
LINC01137	6.7985	7.1053	9.3541	3.2703	9.4741	6.9957	4.9256	7.0169	8.8052	14.4389	1.314	14.8455	11.7874	7.3278	6.2453	10.0968	10.1513	9.1332	4.8518	6.0708	7.037	6.0997	3.6324	3.4444	9.1819	5.2432	4.1935	10.5346	3.6305	8.6842	8.4237	5.8852	2.9704	7.1442	8.3406	5.9013	2.7426	7.3248	4.3315	2.6469	5.1887	4.4437	0.7995	4.6414	22.0376	12.2848	8.0635	8.8437	4.1467
PRKCQ-AS1	3.8989	1.2806	1.6343	4.5556	1.0574	2.3659	0.876	4.8234	3.2823	1.61	0.4857	2.3119	2.5577	2.9091	1.7746	0.7251	2.9526	1.5519	3.6152	6.2021	1.5319	0.5926	0.4177	2.1699	2.2387	1.0806	3.379	1.0322	0.8546	9.8633	3.4287	5.2939	2.69	2.7084	3.1306	1.8173	0.6658	1.3005	1.6983	0.6518	2.4613	2.6702	2.062	2.565	4.5086	2.4203	1.4468	4.7748	2.737
PAXBP1-AS1	1.4704	1.4111	2.1222	0.8675	0.804	1.4976	0.9187	0.6365	0.4653	1.201	0.5508	0.6623	1.4502	1.2259	1.3927	0.6646	0.6976	0.4066	0.7585	0.8998	1.1276	1.8378	0.6936	0.8404	2.2091	0.6977	0.2809	0.6127	1.0172	1.1185	1.1084	0.6003	0.7626	1.5182	1.9116	0.8846	0.3146	0.9832	0.5731	1.6015	1.8079	0.5445	0.3314	2.313	0.2757	0.7959	0.4909	0.6266	0.8581
AC015726.1	9.8521	6.7864	13.9727	6.2152	4.8209	10.4837	17.6158	3.5591	3.3082	10.9094	4.9294	9.4604	5.2595	7.2849	8.3492	3.9021	4.6272	4.2254	7.0524	10.5571	6.6264	5.3574	4.9876	9.9587	11.0036	4.4169	6.2944	2.9657	5.4523	5.561	7.6014	8.2529	3.1049	2.1518	6.735	3.7454	1.3669	9.0158	3.5056	11.4483	10.3795	7.3923	2.7444	13.4743	2.9556	3.9109	7.7037	3.4343	3.7057
AP005233.2	0.8532	1.1388	1.1739	6.3	1.5076	0.6397	0.2066	0	1.2112	0.7354	0	1.133	14.1663	54.1435	1.4745	0.6231	0.1929	2.9501	23.3456	0.7619	5.9006	0.9483	0	5.3172	0.9432	0.6185	0.4662	0.2529	0.2046	12.0818	25.4107	18.8435	1.4062	26.6478	1.3073	0.7809	1.5571	2.2134	2.3723	0	6.1409	0.9247	0.206	0.6141	28.075	0	0.438	0	5.6552
NDUFA6-DT	2.3777	0.8655	2.4047	1.0344	0.7002	1.2799	1.8673	0.8763	0.9087	1.6291	1.1274	0.6072	1.1601	1.4334	1.7911	0.8237	0.841	0.5797	0.7149	0.7985	1.1745	1.0571	0.5851	1.0313	2.052	0.8574	0.4331	0.4157	0.8334	1.3735	0.4686	0.7466	0.5598	0.8424	1.4427	1.1159	0.1702	0.6326	1.0094	2.9958	1.2913	0.5758	0.6697	1.536	0.1734	0.8498	0.6072	0.9209	0.5565
AC093157.1	2.3587	1.0069	1.9029	1.0359	0.8004	1.2058	1.6121	1.0253	0.7305	1.6219	1.005	1.0251	1.0021	0.8499	1.6744	0.7693	1.3455	0.7576	1.2289	0.9286	1.3187	1.2155	1.1201	0.9335	1.2682	0.5176	0.8143	1.211	1.3768	3.3607	1.2175	1.062	1.136	2.6545	2.5243	1.2363	0.5594	0.9596	0.7642	0.5976	1.4551	1.9272	0.6134	1.6245	0.8754	1.221	0.8917	1.0303	0.6605
AC120114.1	5.6441	3.3659	2.8502	1.9527	1.3527	2.9713	0.3489	1.897	5.306	2.769	3.3081	0.6379	3.1253	1.1618	1.1284	2.7298	0.5703	1.2067	0.5224	2.0911	1.7796	2.4426	1.5806	0.6094	5.4874	0.8357	0.1312	1.7089	0.5616	3.0918	0.623	1.2211	2.3751	4.9781	6.6547	1.4837	0.058	3.5048	0.5008	2.1268	1.3335	2.9284	0.7175	4.6894	0.3659	0.8548	0.3144	1.8296	0.5872
AL157700.1	0.7388	1.4254	1.474	0.1741	0.3916	1.4956	1.288	0.347	0.1573	2.1334	0.7067	0.883	0.4135	1.1529	1.6279	0.8498	0.3508	0.7185	0.6148	1.5833	0.8759	1.1332	0.8509	1.8549	1.8241	0.4499	0.6863	0.3285	0.4252	0.0951	1.2776	1.6479	0.1044	0.4615	0.7169	0.8114	0.3093	1.0268	0.2801	2.463	0.5925	1.304	0.9096	1.9677	0	1.7091	0.6145	0.635	0.9393
LINC01003	5.4578	3.5368	9.2423	3.6183	5.4048	5.6997	5.2932	2.8934	4.1506	5.1698	16.7514	5.9735	5.1022	3.3318	4.1199	6.3733	5.0452	6.3379	3.5166	2.9991	6.6661	8.1195	9.0783	4.9978	6.3874	4.6172	4.4569	3.7873	3.193	11.1565	3.5264	10.4657	3.8552	11.3754	6.1264	4.6107	2.4338	5.3345	4.5252	23.8997	6.5121	4.6522	4.7564	7.9867	0.8771	9.0183	1.829	5.2482	3.7928
AC005785.1	0.7751	1.0278	0.9141	0.7045	0.0734	0.5292	4.1823	0.0473	0.0884	1.5748	0.9956	1.5439	0.2169	1.4859	1.758	0.2729	0.2253	0.3589	2.2618	0.2966	1.3537	1.0338	0.1366	1.4195	1.2649	0.2649	0.5143	0.0985	1.2745	1.7817	1.5956	0.1816	0.2346	1.6348	1.3572	0.5827	0.1426	0.1231	0.2309	0.6344	1.6053	0.36	0.4611	2.2516	0.1349	0.0493	0.9038	0.2163	1.155
AL135905.1	4.898	6.0346	3.0067	1.3851	2.2968	4.1103	3.0105	3.6032	3.169	1.7862	8.9664	3.4024	2.0243	1.2699	2.3928	1.4446	1.0735	4.7387	1.0547	5.1139	1.5634	5.1258	4.4632	4.468	4.7762	4.7195	6.7114	8.1093	4.4725	0.3395	0.695	2.8671	4.8437	1.4121	6.5427	2.931	1.0678	2.262	3.1427	12.6784	4.1374	5.2151	2.6196	8.4887	0.7347	2.0784	2.4372	6.0641	4.9373
AL158071.2	1.6232	0.8272	2.2582	2.1761	0.4462	0.9533	1.952	0.1078	0.1344	1.85	0.6072	1.0538	1.5141	0.743	1.7298	0.3161	0.9544	0.9354	2.6199	1.1596	1.1493	0.433	0.1187	1.3102	0.7843	0.502	0.8081	0.2567	0.8564	0.3715	1.9753	1.9877	0.1274	1.1266	1.8607	0.9574	0.1394	0.5013	0.3829	0.451	1.1349	0.6367	0.3527	0.4933	0.4836	0.353	1.2667	0.5918	1.752
AC055855.1	2.5391	1.4634	2.6202	2.5929	0.1869	0.8329	3.9193	0.0903	0.2253	2.827	1.1334	0.843	0.7105	1.4528	3.7024	0.1159	0	0.6859	1.841	0.5668	1.2543	1.1289	0.1741	1.8084	2.8851	0.8283	0.3469	0.5646	2.2834	2.0429	3.6591	0.5552	0.5979	2.0427	4.1066	1.0651	0.2044	0.7058	0.4011	1.984	2.4802	0.4914	0.1532	4.3408	0	0.1883	0.9777	1.1572	2.0003
URB1-AS1	12.9859	8.4809	18.568	4.0803	6.5239	12.8866	10.3575	11.8492	3.5242	11.6874	8.3783	13.6101	5.7715	27.0984	9.9832	11.9249	24.9605	24.0187	7.4167	8.4127	6.6035	19.2732	14.3484	14.6215	7.835	9.5242	9.3218	13.7009	4.3965	58.018	11.3018	13.0289	7.1044	44.6794	8.9082	9.5544	5.6174	7.0066	6.3717	36.4084	8.1685	7.9241	2.7662	13.2881	8.5337	12.1205	8.5884	11.837	11.8693
AC124016.1	0.9342	0.3826	2.169	0.9356	0.4127	0.197	1.3572	0.0997	0.4351	1.6105	0.8042	1.7834	0.3921	1.0933	0.8324	0.2559	0.3961	0.4542	0.7951	0.4171	0.8653	1.4796	0	0.6862	1.0328	0.1524	0.7657	0.8309	0.7561	0.451	1.2789	0.4596	0.0825	0.9284	1.4314	0.3206	0.3009	0.2597	0	0.7299	0.9365	0.1627	0.2537	0.8406	2.5617	0.1039	0.6475	0	0.4187
AC016773.1	0.526	0.3009	0.5169	1.027	0.0664	0.2535	0.9279	0.1604	0.04	1.3278	0.7187	1.397	0.2523	0.7035	1.8504	0.1235	0.1529	0.1461	1.9613	0	0.7238	0.4009	0.1236	0.5619	0.7753	0.098	0.3695	0.0668	1.2433	1.9829	2.8154	0.0493	0.1062	0.5547	1.5735	0.1032	0.0968	0.0835	0.0855	0.8611	1.8079	0.3141	0.1361	1.0817	0.5494	0	0.4398	0.4697	0.9798
AC009318.1	0.9092	0.7619	2.1834	2.9027	0.5987	0.7332	1.7321	0.1245	0.1735	0.8281	0.1969	0.205	0.8641	0.4819	1.0562	0.5638	0.3026	0.4226	1.0383	0.5055	0.6229	0.8809	0.1835	1.2646	0.6448	0.2313	0.2531	0.0915	1.1787	0.8503	1.0285	0.4614	0.3272	0.8475	0.7623	0.5417	0.0166	0.9251	0.2146	0.6434	0.9419	0.5259	0.2982	2.0375	0.5436	0.2442	0.5971	0.4423	0.1678
AL022328.2	6.9429	2.768	12.8508	3.5061	1.5335	3.7183	9.5461	0.8469	0.088	4.916	2.7197	3.5124	2.7756	2.9923	5.8921	1.4488	0.3364	1.7147	3.3142	0.5905	4.1646	7.6068	1.0879	6.4461	3.3505	1.5818	0.7226	0.7351	3.0921	2.3408	4.6692	0.4338	0.3503	2.5346	5.4879	2.1937	0	1.0108	1.3162	3.3583	4.5892	0.7678	0.3592	4.8786	0	0.8825	3.7172	0.5166	2.4249
LINC01023	18.1989	6.6247	18.8635	6.4046	3.7517	11.0526	12.0738	9.7381	4.0044	15.478	18.1968	33.1908	9.3707	9.5421	9.9069	12.8927	9.0538	18.4059	15.421	3.2502	14.7437	9.7095	6.5874	13.3507	14.665	5.8046	20.6839	11.6539	3.8406	32.643	13.5679	14.0081	5.1421	9.7834	10.7822	12.2142	1.2504	6.205	3.9561	26.291	5.3892	6.988	1.7574	10.0433	267.928	8.2041	10.3896	10.6169	4.4296
LINC02076	0.6785	0.8439	0.1167	1.9189	0.025	0.1908	0.8009	0.6277	1.7158	1.1454	0.0433	0.6007	0.0949	0.7059	1.8689	0.8363	0.2685	0.11	1.4118	0.2525	0.3352	0.1508	0.1396	0.6041	2.2713	0.2459	0.5562	0.1006	0.2644	1.4922	2.5098	0.0742	0.2796	1.734	0.4332	0.3881	0.0546	0.1257	0.2144	0.3829	0.7326	0.394	0	1.2618	0.8959	0.2516	0.1568	0.7952	0.1659
AC017074.1	2.0744	1.7849	6.7464	1.2444	2.4992	4.454	2.3288	1.2077	2.309	1.2192	0.2886	1.3774	1.8998	1.8834	1.0999	1.4462	1.4073	2.6898	2.2115	2.1892	2.3756	2.0123	2.3271	3.1229	2.9188	2.2146	1.1335	1.0064	1.696	0.8497	0.8697	1.732	0.9325	1.2851	3.0822	6.1271	0.7288	2.6209	4.3616	1.9647	1.8615	2.8907	8.5365	2.172	0	1.0068	1.4523	2.3575	0.7377
TMEM202-AS1	1.5208	0.7949	1.4755	0.6984	0.8269	0.8114	0.609	0.3996	0.5605	0.8067	1.3279	0.6214	1.0258	0.9006	0.9351	0.7263	0.6614	0.7837	0.4425	1.2188	0.6935	1.8204	1.1549	1.8123	1.0203	0.6276	0.7671	0.763	0.5611	1.8574	0.3372	0.9465	1.818	1.3951	1.2946	1.0707	0.3893	0.5636	0.4731	1.9298	1.0585	0.6883	0.7626	0.8	0.3802	0.5898	0.5766	0.9445	0.6992
AC009120.3	7.2181	5.1799	7.3776	4.6656	1.5487	5.1027	4.9435	0.5283	0.5489	3.1109	3.9453	0.2739	2.3085	4.6342	5.8806	1.2426	0.9793	1.8718	2.0284	2.394	3.5147	2.7507	1.5269	4.5167	7.7519	2.1528	1.803	0.1834	6.6025	4.7788	5.7063	0.4059	2.3308	4.5674	7.3732	3.2086	0.1993	2.6368	1.4075	10.4204	7.3794	3.2569	2.6886	6.6802	0	1.2844	0.7623	0.9668	3.8992
AC005041.3	3.5863	1.6615	2.1308	5.3014	0.8641	1.5584	2.013	0.9744	2.5166	2.2482	0.1247	2.0566	0.8211	2.0351	3.9088	1.2501	0.5529	1.691	0.925	0	0.9663	2.7178	2.1457	1.8286	2.7634	2.127	0.8907	1.8848	1.9938	7.3449	1.6914	1.1763	0.5757	4.3508	1.2489	2.1633	0.21	0.9968	0.1854	3.4815	3.6205	0.1514	0.059	1.6428	9.9335	0.5802	0.8034	1.1463	1.3816
AC087379.2	10.5339	5.2794	8.4021	0	1.1465	18.5433	1.3862	3.3893	0.1625	0.9212	0	32.5394	0.5127	0.2859	0.9894	28.5991	0.3107	2.0785	0	0.2726	0.6787	0.9163	0	0.0815	31.5612	0.2656	0.0834	2.9871	0.0549	0	0	0.5007	0.4314	0.0867	9.8245	0.1397	0.1475	0	0.0579	0	0.2826	0.0709	0	8.6814	174.334	9.7799	0.2351	0.2386	0
LINC00323	0.1647	0.9291	0.3682	0.0388	0.3455	0.0231	0.0449	0.9666	0.3068	1.4016	24.2557	0.9294	0.4147	0.1285	1.0671	1.4206	0.0279	0.2135	0.1713	0.3676	0.183	2.1963	0.5418	0.066	0.7585	0.4476	0.045	0.4394	0.1333	0.212	1.2577	0.7021	0.6688	0.187	0	0.0188	0.6099	0.2746	0.1561	0.193	0.3302	0.0956	8.2438	3.2892	2.1071	5.2743	0.0888	0.8041	0.3892
AC008608.2	12.7159	6.4803	25.0192	4.9145	5.842	12.442	10.8993	5.1031	2.9785	12.605	5.4491	21.4461	10.9599	8.8896	9.7239	12.2588	13.4573	21.2694	6.9267	7.7213	15.8294	9.4978	7.9501	15.6228	7.4976	5.0882	9.1716	10.1785	4.8486	16.697	11.1416	9.3428	2.6946	6.4989	10.1315	9.892	1.3924	7.7758	4.7248	8.4785	11.4535	10.7496	1.0131	9.2447	43.0823	10.1825	9.7923	9.9351	2.4042
DUBR	2.4443	1.4478	2.7314	0.4849	0.9883	2.155	0.7348	1.0907	1.4666	1.6487	0.8956	1.0499	0.6029	0.9827	1.8391	0.8586	1.0399	1.0609	0.7496	1.264	1.8061	0.6447	1.7609	1.527	1.7812	1.1712	0.8678	0.6018	0.8942	2.2667	0.9632	1.2593	1.6729	1.9409	1.5623	2.0917	0.1801	2.6178	0.9975	3.5572	1.0692	1.7447	0.8201	1.6725	0.6311	1.4069	0.687	1.0682	0.8058
AC018638.7	1.8994	1.5557	4.2468	1.0743	1.0069	1.3885	6.8985	0.4055	0.2528	3.4791	4.6147	1.072	0.9036	2.2526	1.8464	0.9364	0.1933	0.431	3.4489	0.848	4.0815	2.1534	0.7031	3.5511	4.6547	0.3718	0.6227	0.3379	3.6554	2.0172	3.0657	0.7476	0.6708	1.0247	3.5894	0.565	0.1223	0.9503	0.5761	2.2756	3.1053	0.9705	3.3016	4.4093	0	0.338	2.1355	0.5936	1.2383
AC105105.1	0.7459	0.6034	1.2829	0.0391	0.5858	1.1186	0.6171	0.1592	0.0882	0.4822	0	0.1926	0.1392	0.5173	0.4297	0.7718	0.1406	0.3761	0.8308	0.222	0.8291	2.1833	0.1705	0.9519	0.3818	0.018	0.0906	0.0737	0.9391	0.1067	1.4333	0	0.6733	0.5648	1.9049	0.4741	0.0534	0.7833	0.2828	0.0216	1.0993	0.3465	0	0.8054	0	0.4425	0.1276	0.3238	0.2296
SLC25A25-AS1	4.3868	2.1633	7.6302	3.7607	1.894	2.2248	5.7778	0.4382	0.2996	4.1452	37.7489	2.1874	2.1958	5.4351	8.5716	1.0518	1.0893	1.2664	4.4148	0.9313	4.4526	3.0249	1.1984	6.4021	5.167	3.3624	1.1216	0.692	4.7639	4.8907	4.0555	1.0099	1.2629	3.826	3.7708	2.1059	0.8744	1.1871	1.2239	5.0359	6.9344	1.1764	2.9733	4.6531	1.7552	0.6628	1.3258	0.9571	3.0597
AC253536.6	3.1914	1.3941	4.2814	4.9639	0.4229	0.8076	0.7534	0.1363	0.1699	3.1636	6.5938	0.4238	1.2503	2.0917	5.1706	1.6607	0.433	1.138	4.7687	0.855	3.9019	4.3632	1.7065	1.1934	4.1163	0.8329	0.5232	1.2773	1.7794	4.622	3.2195	0.314	1.1272	3.2622	6.031	1.1683	0.1542	1.1532	0.3025	2.743	4.8238	1.7047	3.9872	3.4459	0	0	0.4424	0.6234	2.0287
AC098484.4	1.9149	1.4173	2.1517	1.5343	0.3948	1.1665	0.8114	0.1363	0.3058	1.8431	0.7449	0.5298	0.9824	1.1355	0.8273	0.6468	0.1083	0.1035	1.159	0.684	1.0642	1.2983	0.2363	0.5626	1.9994	0.4442	0.0872	0.3122	1.5154	3.184	0.9014	0.3978	0.6538	1.9573	2.7384	0.7302	0.1028	0.4613	0.3267	0.8478	1.5161	0.6078	0.3467	2.8831	0	0.2556	0.4326	0.4738	0.6658
AL135960.1	1.0485	0.7443	3.8952	0.0247	0.0695	1.3119	1.5138	0.1007	0.0558	0.8247	0.1304	0.6092	0.6455	0.1309	0.8834	0.3015	0.0533	0.034	0.6644	0.2575	0.5633	0.8566	0.0431	0.3221	0.6569	0.2622	0.0143	0	0.2735	0.0506	0.2267	0.3783	0.037	0.1786	0.897	0.3239	0.0422	0.102	0.1193	0.1229	0.4366	0.1339	0.2848	1.5189	0	0.0233	0.4118	0.1434	0.2051
AC069200.1	3.2754	1.9077	1.352	2.1613	0.2894	1.4735	1.0707	1.9578	0.8718	4.3762	0.2506	5.6547	0.55	1.2267	2.5472	2.153	0.2222	0.6371	0.7434	0.2925	2.1843	3.0581	0.8084	1.2248	0.8449	0.8548	1.9687	1.4566	1.7674	3.1624	3.021	2.5785	1.3882	2.232	1.3383	0.7494	0.211	1.4567	0.9935	0.3412	1.8186	1.6735	0.5931	2.1219	3.5927	1.7486	1.4125	3.3269	1.7084
AC145124.1	5.1305	1.4431	1.0161	0.2565	0.8241	2.0982	0.367	3.0864	2.8553	1.0051	2.1414	0.6194	1.2617	0.4852	0.403	4.4283	2.3731	0.6048	0.3823	4.5813	0.864	0.6739	0.7674	1.3288	1.3177	0.6086	0.3398	2.005	0.4474	0.5003	0.0448	0	0.8236	2.8251	1.3896	5.229	0.2754	1.7285	0.2653	4.2922	0.6714	1.7331	0.197	0.6155	0	0.1383	0.2155	0.9718	0.5575
AC010976.1	1.2289	0.5731	0.6869	1.6833	0.4326	0.4211	0.6695	0.1148	0.1942	0.9848	0.2939	0.2295	0.3546	0.5393	1.3688	0.2209	0.3126	0.2116	1.2784	0.4629	0.498	0.922	0.1106	1.2616	0.7076	0.1503	0.0944	0.1708	0.739	1.2112	0.6088	0.0378	0.3119	1.1449	1.2847	0.659	0.303	0.2455	0.1674	0.5201	1.1016	0.3211	0.4241	0.6358	0	0.1708	0.4554	0.165	0.5696
MAPKAPK5-AS1	14.6612	10.318	17.7147	13.4072	6.6255	9.3627	8.6544	14.8067	14.7124	14.4679	20.6713	20.4547	11.865	8.8358	9.7852	15.4892	10.5635	7.8444	10.8754	10.4134	15.0094	13.5536	10.2587	8.9659	13.6872	9.4698	11.989	6.7146	9.7598	22.0845	11.1519	18.9042	9.3801	15.6369	11.6539	9.9633	4.9281	11.9537	6.2744	14.0979	13.0996	12.9467	6.0781	18.7293	45.6762	20.9615	8.5132	11.1916	9.4596
TOLLIP-AS1	2.028	2.7479	7.2086	0.7966	1.9411	3.6748	3.5601	2.7899	0.7197	5.0987	2.8883	5.6109	5.1077	5.2042	5.1841	4.1967	2.6752	5.9167	1.4065	3.622	5.5936	3.1558	3.4294	3.912	5.8959	1.7152	1.7854	3.3068	2.0265	2.7558	3.5072	3.0304	1.5917	4.4787	4.6036	1.4436	0.5443	1.6285	0.5553	8.5101	1.6682	3.8203	1.1016	5.8799	2.6089	2.4059	3.0541	2.6409	1.3222
CCDC183-AS1	7.0058	1.3558	5.8873	3.0303	3.5649	4.3884	5.5237	1.2494	8.3795	1.9875	1.2554	2.3554	2.432	1.1624	1.2069	1.5544	3.7601	5.6631	1.9625	2.4549	3.1213	1.9221	14.2258	5.4714	2.2713	2.6614	2.762	6.7042	4.4023	1.5983	0.7668	1.6871	5.4811	4.2302	5.6616	6.8784	0.2142	2.9086	3.2279	6.6289	10.7505	5.602	1.2846	2.3938	3.1883	0.2762	2.1717	1.2472	1.3442
AL589843.1	0.6624	0.2182	1.7143	0.1784	0.8779	1.3481	1.0082	0.5117	0.2015	1.5226	0.2293	1.4661	0.8651	0.1575	1.3492	0.622	0.107	0.409	0.704	2.8167	0.7713	0.4838	0.3114	0.3201	1.081	0.3567	0.1896	0.533	0.3291	0.2233	0.4909	1.2209	0.3788	0.9315	0.58	0.6207	0.1625	0.8066	0.2153	0.1314	0.5254	1.1135	0.514	0.7833	4.5362	0.449	0.7482	1.6266	0.2159
AC005387.1	1.2022	1.4223	1.0339	2.9748	0	0.507	4.1481	0.7699	0	3.6271	1.265	2.794	0.1682	2.0637	1.9478	0	0.2039	1.1691	2.1602	0	1.7817	1.2026	0.4945	0.9633	1.3291	0.2614	0.6569	0.2673	1.7299	2.128	1.2128	1.5774	0.6369	1.3654	2.6096	1.1003	0	0.1671	0.2279	0.6262	1.6688	0.2792	0	2.5962	0	0.5348	1.0184	0	1.1757
AC118754.1	4.289	1.7695	5.9013	1.3477	2.9052	1.1255	6.5426	0	0.4566	2.9577	0.1094	3.7972	0.16	6.0683	1.853	2.1927	0.9699	2.5953	2.3796	1.0213	2.9662	0.9535	1.6466	6.1096	4.1095	1.8655	2.1874	1.7802	2.9829	0	1.3186	1.1255	2.0198	0.9742	4.3812	1.9627	0.1842	0.6358	0.7589	7.4473	2.9989	2.6563	0.1035	5.9689	8.015	0.2544	0.9689	1.3404	1.1185
AL021328.1	5.2382	7.5116	7.0981	0.0374	7.3627	6.0252	4.2662	4.3711	5.0278	8.2096	0.0607	19.815	15.8579	5.0036	7.2008	6.0864	4.4689	9.9308	2.522	6.662	4.7636	10.3213	9.4672	9.4543	7.0195	8.9752	8.1531	3.5294	2.0556	0.1022	2.1503	3.8008	3.3077	2.1634	0.527	7.8085	1.1758	6.4416	8.1249	0.0413	17.3823	6.3408	0.0575	6.3129	4.1593	7.4853	1.4913	16.3087	1.5523
AC073896.4	1.0501	0.3822	2.3478	0.8661	0.116	0.1476	0.6674	0	0.2795	1.0183	2.6115	0.1743	0.2939	0.6555	0.8506	0.2876	0.1781	0.1702	0.4965	0	0.389	0.1751	0.216	0.2805	1.6446	0.3425	0	0.2335	0.3777	0.169	0.7566	0	0.1854	1.6399	1.609	0.6007	0	0.2919	0	2.188	1.4576	0.1219	0	1.2283	0	0.2336	0.1617	0.2051	0.3423
AL441992.1	11.0853	6.7254	11.1048	8.2496	11.2544	6.5617	7.134	3.7363	3.7271	11.3155	4.7622	9.4267	9.3607	4.4915	5.4194	6.9243	13.8531	9.7084	7.1361	5.3836	4.4673	9.3382	9.4392	4.3632	11.0369	8.4586	9.3514	6.9187	13.7818	19.5279	8.7443	11.2271	6.0445	5.5219	10.6281	7.3865	4.1966	6.5948	9.2171	5.977	14.2776	11.7433	3.3805	4.4797	25.5977	6.7484	6.5897	4.1026	6.2128
LINC00909	10.5972	6.4269	11.6351	4.6169	4.1977	7.6854	4.4666	7.0536	2.4564	6.6319	7.2863	7.7116	7.3536	1.8306	4.0547	8.6321	4.2313	3.9929	4.1789	8.1186	7.8669	8.7233	2.9113	7.1439	10.3395	3.8098	6.2606	4.7647	4.3958	4.2411	4.3505	7.2341	5.3034	7.4501	9.5767	4.9925	1.398	9.5975	2.8318	13.6374	9.0829	7.1291	3.0658	9.9996	3.622	5.4625	4.3062	4.7051	3.2441
AC021678.2	0	0.0868	0	0.0562	0	0	0.0433	2.2915	0.3175	0	0.502	0	0.1335	0.0745	0	0	0	0.1547	0.0902	0	0	0.5568	10.1064	0	0.6154	0	0.1955	1.3791	0.2145	0	0	0.0782	0	0.1355	0	0	0	0	10.2656	0.0621	0	0	0.3023	0.0859	0.2907	0.6367	0	0.466	0.0389
U52111.1	0.1947	0.5669	0.8705	1.8808	0.129	0.2189	0.8484	0.2078	0.4145	0.2517	0.1117	0.1293	0.3813	0.6075	0.6938	0.1599	0.066	0.0631	0.4418	0.3476	0.2164	0.8438	0.2402	0.7799	0.8608	0.2117	0.0532	0.0866	0.5952	10.0235	0.6172	0.1915	0.6188	1.2159	0.8948	0.4454	0	0.0541	0.3321	0.6591	0.5404	0.0904	0.0705	0.7006	0	0.0866	0.2398	0.7604	0.6345
AC010719.1	1.6995	1.3404	2.3384	2.3363	0.1877	0.5575	4.2694	0.6651	0.6786	1.7091	3.2513	2.6331	0.5549	2.5637	5.6906	0	0.0961	1.3773	2.143	0.3794	1.9939	0.9445	0.9321	2.4209	6.1587	0.1232	4.1016	0.5039	4.8399	4.2846	1.143	0.1858	0.2001	3.6192	2.7488	2.0739	0.0912	0.3149	0.1611	1.9919	1.0485	0.5263	0.5642	4.2308	0.863	0	0.5671	0.4426	2.9086
AL133410.1	1.473	1.0159	0.7111	1.9975	0.3653	0.5086	1.2295	0.1103	0.0825	1.537	2.0665	0.8065	0.405	1.5001	2.0096	0.3256	0.2279	0.2681	1.1828	0.5307	1.1872	1.0685	0.2126	2.1258	1.6665	0.2698	0.3106	0.2988	1.5896	0.4158	0.8491	0.3051	0.2008	0.7631	1.2143	0.6267	0.0666	0.3735	0.1568	1.4807	1.5464	0.7802	0.496	0.8929	0.1575	0.2069	0.4935	0.4442	0.5223
AL096799.1	13.051	9.6026	13.7543	0	7.6053	13.4289	7.7656	24.3031	36.5119	3.71	0	4.7939	25.6429	16.8127	3.0592	2.1294	9.7957	8.6412	3.5714	16.3654	12.7569	3.8889	0.2284	4.4499	38.7828	16.5461	3.338	21.4862	18.3793	0	6.8829	2.3681	13.9264	0.4731	9.0767	11.5632	0	15.7452	26.9525	0.1446	33.0629	15.2196	0	37.5775	0	5.4354	3.0793	18.6581	1.2673
AC010883.1	3.1898	2.2255	3.2917	4.0092	1.1743	2.2422	4.441	0.9079	1.1321	10.1964	1.9324	11.6493	2.6779	4.314	9.1301	2.0385	1.4427	3.102	5.8322	1.8989	2.9545	4.9637	0	6.3898	7.4448	1.3874	4.2122	1.6549	1.6256	2.7376	3.3711	0.5231	0.1878	4.5285	8.689	3.2843	0.2568	1.0344	0.4031	1.5231	5.0838	1.6051	0.4813	7.7494	6.4792	0.2365	1.8833	2.2846	1.9063
KMT2E-AS1	18.1119	13.5	37.3805	29.8778	9.5249	10.1041	35.3443	5.7074	4.4383	37.7292	18.5344	40.0875	10.6195	16.8682	33.3495	17.0073	8.5815	19.7568	25.6657	3.5941	19.0658	16.4885	5.0848	21.1159	28.446	6.0645	14.3737	4.0911	9.1006	34.8814	34.6359	6.6952	6.5999	26.0395	24.4478	11.3139	1.25	6.3128	2.6161	26.8811	16.406	7.4112	4.2164	13.8651	31.1831	9.848	17.2243	5.8401	7.0755
AL158063.1	1.3817	0.4311	1.4937	0.9303	0.0872	0.444	0.8603	0.1685	0	5.5295	1.1328	2.097	0.1105	1.232	1.1512	0	0	0.3839	1.4933	0.5288	0.7313	1.7112	0.1624	0.5272	2.6186	0.2575	0.3236	0	1.136	3.1762	3.1858	0.259	0.1394	0.1121	1.3105	0.3613	0.0636	0.1097	0.2993	1.2338	1.4613	0.0917	0.0715	2.1312	0	0	0.8512	0	0.7078
SNHG25	3.0445	2.7706	3.6653	7.5334	1.1768	0.214	3.7319	0.4874	1.4181	4.2645	0.728	7.8335	1.4909	3.3256	1.4798	1.2507	0.2582	8.8821	4.4628	0.6797	2.5379	2.538	0.3131	1.8296	1.9634	0.4966	1.4556	2.3693	1.0952	6.6138	4.8262	2.7462	1.6129	2.5933	1.555	2.0898	0	0.4231	0.5772	1.1894	1.1739	1.0606	0.2756	1.3697	46.8439	0.6772	1.7584	2.676	1.1165
AC079174.2	1.6694	0.5127	1.3638	1.2048	0.2535	0.4107	1.6673	0.0668	0.2777	1.1467	4.9301	0.6581	0.146	0.7815	1.3185	0.5715	0.4247	0.575	2.447	0.6522	0.3092	0.4523	0.7725	1.7277	2.1147	0.3857	0.7696	0.4176	0.638	3.0221	1.4134	0.2396	0.4422	2.0737	1.0125	0.7639	0.1512	0.464	0.1978	3.4783	1.6414	0.9208	0.7745	1.3143	0.5086	0.1392	0.5946	0.5299	0.8163
HOXA-AS2	5.2791	3.2903	3.8194	1.0191	2.2202	5.9482	5.4266	5.015	4.7806	7.3379	0.0373	3.8804	3.4779	3.6478	3.1939	4.1081	2.207	3.2457	2.7192	2.992	1.9053	5.4693	3.4134	5.5359	4.8887	2.4232	2.8101	2.6855	3.1884	0.4514	3.4361	1.1629	2.9722	15.0667	9.1434	3.2804	0.7842	2.5557	1.1596	11.4157	3.0766	3.0764	0.8465	5.4476	4.7482	3.0332	3.1623	7.6861	1.6129
AC018730.1	1.9791	1.6158	2.2368	0.2665	0.8243	2.2258	1.4889	1.0019	0.1957	1.3769	0.2488	0.7885	1.3608	0.5824	1.136	1.8429	0.5754	0.6965	0.1176	1.4643	1.8645	3.1111	0.7443	0.7853	3.2924	1.119	0.8033	1.1316	0.1932	0.2002	0.2771	2.6152	0.679	0.6422	2.9747	0.5175	0.2185	0.5501	0.2894	1.296	1.2558	1.3264	0.9931	2.1165	0.8614	0.805	0.749	0.4639	0.4147
AC007406.4	18.5895	15.1252	14.7633	10.4133	8.2709	16.8908	6.1697	14.4482	14.6041	13.2333	10.241	6.1828	8.9845	7.0829	8.1972	14.4603	7.7206	9.6285	6.2872	14.9309	7.5426	8.6803	12.4921	13.0321	17.7473	11.961	11.8536	9.3798	9.6404	9.6239	5.5407	13.9464	12.7539	10.1394	12.3751	12.4774	2.6979	19.4621	8.4275	7.3886	16.1835	15.1299	11.6144	14.5102	1.8303	13.2141	6.7028	14.5763	8.4314
LAMC1-AS1	3.7548	2.9748	1.9753	1.8738	1.4635	1.6146	1.5241	0.5658	0.2352	2.951	0.5915	0.2933	1.2362	0.8272	3.8647	0.3629	0	0.2864	2.1723	0.7889	2.1276	4.1243	0.1817	1.7697	1.2209	1.1528	0	0.5893	1.8274	2.2747	0.8912	1.5938	2.3402	1.7559	3.0458	0.9096	1.1382	1.4734	0.9212	1.2656	1.6351	0.4104	0.7998	1.9078	0	0.7861	1.1566	0.6903	0.864
AC009404.1	1.3607	1.6827	1.6657	2.1692	0.5746	1.3616	3.0961	0.9825	0.5752	3.3376	0.5359	12.4234	0.7952	1.4989	2.0879	0.7453	0.3937	3.5806	1.6578	1.8762	1.8238	2.4288	2.5351	2.2982	2.6178	2.2455	5.2156	2.6874	1.6052	2.3184	1.7303	0.9452	1.0177	1.2045	1.6046	1.0164	0.4834	1.0234	0.8877	1.2821	1.395	0.632	0.6304	2.7872	2.6339	1.0505	0.6595	0.5785	0.8741
AC005696.1	4.7764	3.5643	3.4502	1.4633	0.7385	3.3574	2.3419	1.2235	1.6527	4.4259	13.432	2.6958	2.0049	1.7888	3.4049	2.8779	1.6201	2.1676	1.4455	2.7723	1.5926	4.4595	2.9469	1.786	5.6325	2.0774	1.6964	1.2744	2.835	2.4595	2.478	1.0967	1.6869	2.4411	4.1471	1.9671	0.4615	3.0535	1.3582	6.9665	3.536	3.2169	6.3997	3.7819	0	1.9124	1.0299	0.7464	1.1677
LINC01426	0.745	6.195	0.3102	5.6739	0.2945	1.4333	0.3347	19.1773	22.8369	4.1659	0.0525	0.2474	0.1756	36.0415	4.4853	12.1035	0.3724	9.813	3.0261	10.3822	3.879	4.4064	4.8387	3.2362	2.3627	10.1649	4.371	9.6083	1.34	6.6002	6.5665	12.2833	1.5927	22.4905	0.1903	0.6908	8.4174	0.7848	23.4611	0.0511	13.1603	12.3035	0.0213	11.9538	1.3859	8.2339	0.7127	31.3727	4.5698
AL118558.3	8.7265	5.9249	13.0861	1.294	1.9924	7.223	9.7219	1.6326	1.3049	11.3254	19.5078	10.1564	3.6767	4.2842	5.5282	5.693	2.4611	3.8776	2.4851	2.364	5.8123	8.3699	3.9524	2.8283	9.4307	5.4587	5.7327	2.3546	2.2573	13.6321	5.539	4.7599	2.2163	4.6214	11.8686	3.3651	0.4737	3.3249	1.5986	34.3735	4.6578	3.4157	6.3202	5.4698	10.3962	4.6237	4.3794	3.524	3.8355
LINC02473	8.607	0.7113	1.7284	0	1.1715	2.1976	0.7266	0.0199	0.0495	0.5213	0	0.0309	1.4061	0.3775	4.2512	0.051	0.0631	0.7842	0.4224	0.1662	0.1724	4.2197	0.1148	0.8201	1.9202	0.2428	1.144	0.1241	0.7364	0.0299	0.0268	0.0305	0.1972	0.0528	0.2376	0.2342	0	0.1552	0.0882	0.1939	0.1722	0.7563	0	0.1507	0	0.1656	1.2038	0	0.1365
TNKS2-AS1	0.6367	0.7339	1.095	0.2501	0.0469	1.2531	1.0406	0.2265	1.2428	1.1891	0.1218	2.1843	1.9599	0.5299	0.8252	0.465	0.7199	0.8256	1.0838	0.379	1.5726	0.4246	0.4365	0.6235	1.7597	0.2769	0.6378	1.0382	0.4581	2.254	0.7952	1.6011	0.2998	0.7834	1.1381	0.5827	0.2392	0.7079	0.7644	0.4422	0.7201	0.2957	0.0384	1.1076	1.6812	0.9442	0.3596	0.6633	1.2107
AL390066.1	2.3439	0.8699	1.8338	1.5596	1.076	1.8866	3.0212	0.412	0.685	1.8421	0.1583	2.1361	0.9003	1.922	2.2933	0.3021	0.4677	0.7449	1.7559	0.3694	1.3962	0.9195	0.5293	2.5532	1.2702	0.3998	0.9794	0.9401	2.2649	1.4791	4.0004	0.7236	1.4609	1.0961	2.9341	1.367	0.2368	0.7154	0.7841	0.3112	3.4591	1.3235	0.2164	1.2075	0.5601	0.4907	1.2316	0.8259	1.2884
AL031600.1	5.7538	1.2162	7.5337	6.8235	0.8199	0.5219	2.1572	0.1585	0.1976	3.0398	0	0	1.0388	1.5061	6.6156	0.4067	0	0.722	3.7213	0.9944	1.3753	3.4659	0.1527	3.0736	2.5992	0.3229	0.2028	0.1651	3.3384	3.3451	4.7077	0.487	0.9178	5.1646	5.3087	0.7644	0	1.0318	0.0704	9.2817	5.2673	0.4311	2.4197	3.6073	0	0.6606	0.6861	0.7251	4.7798
LINC01943	2.5104	1.3838	2.0725	5.8823	0.8555	1.1294	0.8076	3.736	1.4128	1.6384	0.1372	2.1432	7.0251	1.4327	2.5566	2.7502	2.5789	3.1621	4.4769	2.3698	1.0098	0.9088	3.0093	2.4521	0.6079	1.9654	5.2126	0.5103	0.9289	7.7562	11.6183	3.0114	2.1279	4.0324	0.7693	1.9365	3.1186	1.3956	1.2238	0.2989	4.3365	1.4992	0.2078	1.7296	7.2554	5.3607	2.6734	1.6812	3.6007
AL121658.1	0.8915	0.595	1.7378	1.2606	0.1969	0.752	1.2412	0.1903	0.0791	1.1527	0.6254	0.888	0.4158	0.5565	0.0963	0.1628	0.4032	0.4817	0.9556	0.2654	1.6515	0	0	0.7937	0.9309	0.1939	0.5683	0.1322	0.5345	3.2518	0.9422	0.4874	0.6298	1.0969	0.9866	0.68	0	0.413	0.2817	1.7028	1.3751	0.6212	0.1614	0.3209	0.1811	0.2644	0.4119	0.3483	0.4844
AC145285.6	0.6874	0.7507	2.4592	1.9764	0.6377	0.5412	1.4481	0.4109	0.6221	1.6888	0.6575	0.4565	0.731	0.4291	2.2275	0.3765	0.1399	0.6685	0.8061	0.4911	1.2225	1.2378	0.7917	1.2118	0.9627	0.3289	0.4883	0.3057	1.2117	1.3717	0.9907	0.3157	0.2914	1.054	1.2991	0.4404	0.1107	0.2293	0.2867	2.1485	1.5268	0.4151	0.2987	1.1629	3.1836	0.2447	0.3176	0.0537	0.5378
SNHG5	64.3055	55.4849	36.7785	24.9914	17.2533	20.2637	13.4779	35.2738	24.8891	33.5865	6.9723	53.2493	29.0093	11.2542	30.7126	50.7093	25.4426	14.1217	11.7961	47.0715	47.5498	26.6122	22.9252	33.5344	30.2119	26.819	31.8628	8.6077	17.0297	5.9323	5.6805	42.4385	54.3944	10.0528	19.2405	6.8256	19.5104	37.0311	6.3174	9.6368	21.1333	29.0737	11.9519	14.8786	83.4857	39.6572	17.6777	19.0647	13.35
AC018761.3	1.3634	0.6948	1.1255	0.7711	0.2409	0.7667	0.3961	0	0	0.7051	1.1476	0.1811	0	0.5106	2.1205	0.8961	0	0	0.1031	0.2435	0	0.7274	0	3.6414	0.9043	0	0	0.2425	0.5885	0.351	0.1572	0	0	0.1548	0.9749	0.1248	0.0878	0.3032	0.3102	0.142	0.5047	0.1267	0.0987	0.3925	0	0	0.084	0	0.2667
SATB2-AS1	3.4384	1.8229	0.7036	1.1386	0.8958	5.3345	1.7739	1.7164	0.9199	1.8619	0.1147	1.9787	1.6185	0.8255	1.7141	1.3329	3.0742	4.0125	0.4936	1.3541	1.8553	1.4934	1.7116	3.2119	2.5342	1.4802	2.1389	2.274	0.5899	2.3948	1.0063	0.5205	0.5356	1.2617	3.7824	3.6068	0.3975	1.7448	0.468	7.2194	0.9246	4.0296	0.0702	1.1614	0.2794	1.2551	1.1352	1.0332	0.9484
LINC01600	0.3744	0.4585	1.4519	0.2086	0.391	1.3399	0.2596	0.3052	0.5436	0.8656	1.2112	0.5651	0.6287	0.2975	0.9265	0.1492	0.8775	0.3972	0.0901	0.5775	0.3027	0.6583	0.476	1.2365	1.6182	0.2813	0.4464	0.2422	0.2204	0.5039	0.157	0.5806	0.1443	0.5219	0.5737	0.81	0.0329	1.2678	0.1936	0.1419	0.42	0.506	0.1972	0.7718	0	0.1514	0.1678	1.5957	0.3107
DNAJC3-DT	5.0969	2.8742	4.8441	0.8748	1.5227	3.1478	2.1507	3.371	1.2547	4.3172	14.823	2.0736	3.1989	2.3355	7.3507	3.6633	4.2772	4.0875	1.538	2.1573	3.3182	2.9275	3.2962	7.1764	5.6999	2.6012	2.4308	2.3845	2.6813	10.2592	1.3077	2.6092	1.7273	3.4464	4.7549	4.1658	0.9678	2.4567	1.2176	19.5824	4.6166	2.9559	6.0599	6.8074	0.4309	3.3815	1.8513	4.2354	2.5066
AC127024.4	7.5569	3.5011	4.0173	5.3426	0.9104	3.4769	6.7368	0.44	0.1829	3.9972	2.1028	2.737	2.4992	3.8593	6.0103	0.9408	0.6991	0.4454	3.2485	1.8404	1.5271	1.1454	0.5651	4.2202	3.4177	1.7928	0	0.3055	3.5833	3.5375	5.9402	1.1267	0.7279	4.0963	6.3157	1.729	0.2213	0.7638	0.9117	2.6839	4.2383	2.2337	2.3634	5.1923	0	0.9169	1.5871	2.147	3.4711
POLH-AS1	2.9922	1.9839	0.7352	3.0221	0.8025	1.5023	0.7374	0.5475	0.7396	0.6909	1.5946	1.703	0.957	0.8005	1.3851	1.4634	0.58	0.8314	0.7681	0.668	1.7421	1.7817	1.1429	2.7401	1.3783	0.6507	1.5766	0.5703	1.2301	1.0318	0.9856	2.033	1.8872	1.6992	1.7466	1.5649	0.6884	1.0693	0.8104	0.835	1.2526	1.5884	0.4644	3.2308	1.3024	0.7607	1.4484	1.5864	0.9057
AC090589.3	4.9765	4.6965	4.1844	4.5173	2.0355	4.0422	5.69	0.7082	0.0981	3.813	4.5133	1.591	1.8568	5.1771	5.7334	1.0096	0.7502	1.0754	2.9981	1.6459	4.2338	4.0563	0.9098	2.2645	5.9092	1.6033	0.3021	0.3279	4.84	5.8132	5.8436	0.7255	0.9114	3.768	7.7192	1.9399	0.2968	1.6394	0.8386	2.5923	3.9798	2.654	2.4696	4.9752	0	2.1319	2.1007	1.8721	2.944
KTN1-AS1	1.291	0.5696	1.3188	0.7068	0.4781	0.7773	0.4499	0.824	0.5068	0.9779	1.4868	0.3896	1.2188	0.6593	0.8789	0.3357	0.345	0.3551	0.3058	1.3857	1.0532	0.5218	0.472	0.2508	0.6103	0.4481	0.4133	0.4059	0.2768	4.5829	0.3909	0.4448	0.4421	1.3181	1.0723	0.3342	0.4074	0.6814	0.2373	1.508	0.3298	0.9994	0.7461	0.5773	0.6834	0.5569	0.2932	0.5298	0.3826
AL031709.1	5.1074	1.7706	3.3464	1.8341	0.2149	1.9147	3.0033	0	0.5179	2.0964	1.8611	0.323	2.1779	0.7591	0.7881	0.2664	0.495	0.1577	2.0241	0	1.9824	4.2171	0.2001	1.559	4.1228	1.0578	0	0	2.0122	1.2524	1.1216	0.3191	0.5154	1.243	3.8507	1.1129	0.235	0.8112	0.3689	1.9003	1.5004	1.5816	1.0569	7.0902	0	0	0.8241	0.7601	1.1892
GUSBP11	4.0335	1.4782	7.0777	1.2395	0.9089	2.1915	6.0131	0.2269	0.2829	2.6839	0.9593	0.4795	1.2736	1.2248	2.296	0.4777	0.1849	0.4594	1.5155	0.6449	1.5852	4.0803	0.3811	2.4821	5.8451	0.7764	0.0819	0.2909	2.1519	1.0087	1.084	0.1609	0.2503	1.7179	2.9926	0.7233	0.0658	0.6515	1.3071	4.415	2.8078	1.4874	0.8241	2.5895	0.0166	0.3516	0.722	0.2342	0.7063
AC012360.3	3.5582	1.4739	3.9673	1.6915	1.3822	2.1907	3.4314	0.6941	1.4533	3.2787	0.9272	1.0388	1.2533	1.5317	2.0674	1.8482	1.644	2.1279	1.8566	0.7943	2.0911	2.5571	0.7823	5.0959	2.7243	1.0807	0.4023	0.2728	2.3172	5.2914	2.7407	0.9659	0.78	5.0864	3.0864	2.4284	0.1778	1.1937	0.9304	2.4607	2.8575	1.3108	0.6443	2.6275	0.3365	0.9279	1.0016	1.2462	1.2699
AL162741.1	0.6791	0.4449	0.4672	4.4487	0.33	0.3055	1.8004	0.2319	0.4338	1.2877	0.1819	0.8116	0.19	3.2637	0.6161	0.2604	0.2764	0.1321	0.8734	0.1819	0.4025	0.7246	0.0559	2.1401	0.3503	0.0886	0.2226	0.0604	0.6351	0.4808	0.9394	0.0445	0.0959	2.3522	0.5549	0.3729	0.0656	0.151	0.2575	0.1415	1.7595	0.2839	0.0984	0.611	2.4	0.1208	0.3347	0.2122	0.1107
LINC02328	1.1865	0.3739	0.6335	1.3438	0.4303	0.4282	0.5596	1.5197	0.6599	0.5267	0.0203	0.294	1.0506	0.5417	1.0673	0.2328	0.2763	0.5626	1.7485	0.3953	0.4199	1.8188	0.1165	0.4541	0.3198	0.3312	1.7128	0.315	0.4077	0.285	0.8575	0.5925	0.7881	0.8246	0.8321	0.4457	0.6103	0.2363	0.4297	0.2122	1.1909	0.4113	0.0577	0.9688	0.8202	0.4412	0.2728	0.9271	1.2354
IBA57-DT	3.1359	0.9613	3.1793	0.6223	0	0.3713	2.9972	0	0.4393	1.2804	0.3157	1.3151	0.0924	0.7212	0.9626	0.5424	0.2239	0.321	0.6244	0.1474	1.1007	0	0.5431	0.9698	2.4937	0.2154	0.5411	0.1468	0.475	1.5935	1.2368	1.4076	0.4663	1.031	0.7587	0.3776	0.1063	0.1835	0.0626	0.9457	0.9164	0.0767	0.1195	2.0791	0	0.4406	0.3559	0	0.3766
AC078906.1	2.9167	1.3995	2.4626	0.9373	0.5271	0.3728	4.0928	0.0566	0.4235	2.457	0	0.6162	0.8904	2.3171	3.3508	0.7262	0.5396	0.2579	0.652	0.9471	2.063	0.9726	0.1091	0.6374	1.3191	0.2883	0.5795	0	1.0015	1.1094	0.4585	0.4349	0.5619	1.054	1.422	0.6067	0.7686	0.4422	0.2011	0	1.4722	0.9237	0.048	2.0995	1.2926	0.118	0.3267	0	0.4322
AC004918.3	21.3881	6.5782	11.4093	3.2883	7.1746	10.9982	2.4924	4.3459	3.775	5.1759	2.7132	4.0251	5.6331	2.6415	6.5968	4.824	5.1211	3.1885	2.3364	6.5365	4.5765	14.1874	6.1158	4.8877	7.9239	5.4223	2.9373	8.3414	5.5954	6.2576	1.3186	7.4281	7.1904	14.0941	15.4802	6.1236	4.0888	4.26	6.9384	5.8387	6.9856	8.872	2.5679	5.0632	1.3939	4.1723	2.3605	4.8255	5.8162
AC120036.4	0.3398	0.3401	0.8473	2.302	0.0938	0.9076	0.1388	0.7434	0.2487	1.0068	0.7475	0.3948	0.0238	0.1591	0.2752	0.442	0.1153	0.2753	0.6105	1.1757	0.1574	0.1983	0.7337	0	0.2191	1.1453	0.4177	0.0378	0.1681	0.3554	0.2448	1.0309	1.35	0.9647	0.2169	0.136	0.0958	0.4486	0.5314	0.3319	0.7337	0.9864	0.9997	1.5286	0.1553	1.5116	0.1439	1.6924	1.3291
AC032044.1	0.7655	0.6131	0.5267	1.2268	0.4734	0.861	1.3902	0.1307	0.163	0.4619	0.4101	0	0.2571	0.5734	0.5953	0	0.2077	0.2978	0.7529	0.1367	0	0.5105	0.2519	1.4721	1.5798	0.7991	0	0	0.5508	1.6753	0.7943	0	0.3244	0.4347	0.8602	0.3503	0.0986	0	0.3483	0.7178	0.8501	0.3556	0.6099	1.6531	0	0.4087	0.1415	0.3589	0.7486
LINCR-0001	1.2583	0.663	1.9819	0.2029	0.7021	1.0428	3.3554	0.1414	0.1939	0.4995	0.19	0.0879	0.4818	1.0334	0.7082	0.1451	0.0899	0.2576	0.3257	0.6209	0.7116	0.8392	0.2724	0.7606	1.6107	0.1872	0.1267	0.2062	0.9648	0.1918	0.3436	0.1738	0.1403	0.3197	1.8434	0.9546	0	0.6995	0.1004	0.8279	1.1644	0.9075	0.1439	0.5482	0.8475	0.1178	0.5406	0.1811	0.2806
AL831711.1	5.3921	4.5348	3.3258	1.0516	3.4497	3.7641	1.148	2.3815	1.8806	5.1287	0.0711	4.568	3.7463	1.5088	3.9764	4.8886	1.6398	1.5671	5.4159	5.3131	3.5821	1.116	0.9177	6.9525	3.9741	1.6983	2.4383	2.6459	1.6052	0.2394	2.4652	0.9758	1.4447	4.5402	4.2734	1.6166	0.539	3.721	1.0575	0.9685	3.2118	0.6045	0.7407	2.2753	0	2.4815	1.4318	5.0845	1.8789
AC009336.1	0.8856	0.9423	0.4218	0.1926	0.1505	0.5363	0.4701	0.0582	0.3264	1.4387	0	0.1809	0.2669	0.5953	1.0596	1.0821	0.0924	0.5742	0.2062	0.1825	0.7067	0.9086	0.1681	0.655	0.7531	0.4148	0.1117	0.1818	0.5146	0.3508	0.5498	1.4301	0	0.5803	0.6611	1.5587	0.0219	0.3408	0.2066	0.0355	0.5043	0.2848	0.296	0.4168	0.7472	0	0.2518	0.3194	0.2221
MIR600HG	1.4851	1.3451	3.4543	1.1749	1.4449	3.1715	1.5796	0.3774	0.4235	1.4554	5.0869	0.3287	1.415	1.3353	1.2718	1.5011	2.051	1.0201	0.9765	1.2314	1.5197	1.7922	3.4034	1.1239	1.2705	1.9686	0.3478	2.4216	2.0479	3.0384	0.3873	3.0619	0.9991	0.8132	1.6344	2.0145	0.131	1.0516	1.8501	6.548	2.3996	2.8742	2.7146	1.1199	0.0431	1.0854	0.757	0.5802	0.8645
AC004585.1	8.181	2.0528	1.5846	8.5727	2.2456	1.2059	2.4809	0.7121	1.353	1.8485	0.0608	4.1137	6.8014	1.9831	0.978	0.6961	3.3408	2.5232	7.2411	2.9079	0.9417	0.4238	1.1761	2.1638	1.3171	3.6619	5.208	1.4128	2.3143	4.7034	3.9833	0.3647	2.5808	5.0065	3.8944	1.781	1.3558	2.7375	1.1444	0.4551	7.4971	3.1728	0	1.8009	1.3552	0.636	3.621	1.8617	6.3175
CEBPA-DT	0.6739	0.7709	1.0927	2.8585	0.6166	0.7037	0.2273	0.5343	3.0235	0.5601	0.0368	0.9588	1.32	1.8627	0.6551	0.2373	0.5225	2.0596	1.4202	0.4298	0.7846	0.4173	1.2275	0.4371	0.9224	2.3447	1.9989	1.1559	1.212	3.5009	1.748	0.4105	1.428	2.788	1.1308	1.2555	0.2635	0.4816	1.4052	11.7591	1.5144	0.9166	0.0523	1.6977	4.8102	0.5139	0.5338	1.4291	1.3807
AC006504.7	3.9986	3.0324	3.324	2.9055	3.0912	2.6233	2.6625	3.6277	1.5965	3.4467	6.8846	3.5401	2.6109	6.4477	3.1312	2.9204	4.069	1.2962	4.8529	2.2316	3.9505	2.5555	6.0306	5.6959	3.3155	2.6087	8.4665	2.0745	3.536	17.0512	4.8981	4.2626	2.0007	5.2037	2.723	4.0408	0.4829	4.3531	2.2109	7.9844	3.1864	5.7267	4.163	4.6172	0.2031	4.0025	2.2068	4.2957	2.3897
THAP9-AS1	23.3392	13.5934	22.7437	10.9096	21.8319	21.4186	27.335	6.6258	10.0805	19.2469	14.7664	15.7528	20.24	17.9474	36.1912	10.9391	12.4871	14.6008	19.5509	15.2119	20.4497	32.8306	37.7466	13.7525	17.4144	14.5465	9.8605	7.7895	22.7028	14.4806	17.8782	16.4315	6.9004	27.696	23.4351	31.2806	9.9268	18.9534	16.7312	10.4906	33.117	16.887	9.7413	18.2029	3.5482	12.2241	11.1989	12.6518	14.4397
INSYN1-AS1	0	0.0939	0	0	0.0285	0	0.0937	0.0275	0.103	0.139	12.736	0.0857	0	0	0.2508	0.0707	0	0	0.0244	0.0576	0	0.086	0	0	0.1426	0	0	0.3442	0	0.0415	0.1487	0.0846	0	0	0.0329	0.0295	0.0208	0	0	0.5041	0.0398	0	1.098	0.0232	0	0	0	0	0
AC018521.6	2.5265	1.9543	6.5179	1.6373	1.9531	4.2622	1.147	1.8876	2.1855	2.8583	4.3499	0.8388	3.8885	1.9713	4.2979	3.6327	0.6427	1.0237	2.2699	4.5121	2.3401	1.4743	3.897	1.3496	3.9569	3.1592	0	2.5279	1.9313	5.0819	1.2743	3.522	5.1308	4.3041	2.4195	3.3239	0.2034	3.8624	1.3171	2.9611	3.1173	3.2272	1.4867	6.7061	0	2.2479	0.9728	2.9609	2.6766
AC093297.2	28.8345	22.1094	19.8657	14.2044	11.0294	24.6056	11.9685	12.472	9.1293	21.4671	8.3627	12.4756	13.5267	15.6107	15.4721	14.6892	20.816	11.3362	7.9979	16.8527	17.7841	23.2942	20.5048	29.7949	23.2964	13.7296	20.395	10.1684	13.2301	8.1977	7.9473	17.0959	11.9654	10.0966	18.0545	16.6762	4.4403	18.5295	15.6818	15.1952	17.011	13.0809	8.3565	18.9554	2.1003	10.7333	9.7883	13.5303	8.2074
AC006273.1	2.2118	1.1182	1.4371	0.1158	1.0313	4.8368	0.8479	0.5771	0.9812	4.2367	0.094	2.6925	0.5502	0.4602	2.3889	2.2211	0.7502	2.2306	0.6972	1.5361	1.4568	0.8195	0.6065	3.4131	0.8151	1.0154	1.5443	0.4371	0.2652	0.9491	0	1.854	0.3472	0.8373	0.7531	0.8434	0.7519	2.1175	0.1864	2.1122	0.2274	1.0844	0.178	1.2825	6.8886	1.3119	4.1256	0.576	0.2804
LINC02365	0.1669	0.3645	3.6162	0.236	0.1843	0.0938	3.3637	0.0712	0.0888	1.0428	0.3192	0	0	2.3957	0.4866	0.5027	0.0566	0.0541	0.0631	0.298	0	0.8346	0.1373	0	0.0922	0.254	0.7294	0.2226	1.7408	0.0537	0.2886	0.2189	0.4126	0.2369	0.0426	0.1145	0.1612	0.0928	0.0949	394.375	0.7721	0.0388	0.0302	0.2102	0.1017	0.0742	0.4626	0.4563	0.4352
AC117386.2	0.205	0.3359	0.0705	0	0.2717	0.0576	0.4096	0.3064	0.764	0	36.4779	0	0	0.3199	0.0664	0.0562	0	1.7945	0.1551	0.9154	0.6077	0.0684	0.253	0	0.3022	0.0446	0.112	1.55	1.0326	2.5734	0	0.4035	0.1448	0.0582	0.4189	0.4222	0.066	0.2849	0.0777	0.0534	0.1897	0.2857	1.9304	0.1845	0.9995	0.9121	0.5368	0	0.3342
AC144652.1	1.2378	0.7114	1.3445	1.5045	0.8921	0.9891	0.4495	1.4185	0.6589	1.2635	8.1256	0.9516	0.9844	0.5693	0.7599	1.6771	0.8397	1.6049	1.1829	0.8144	0.8206	0.9992	1.0718	0.696	1.5365	1.0767	0.9611	0.8691	0.6093	1.4676	0.9013	1.4958	1.4265	10.9133	0.9316	1.0434	0.5245	0.8692	0.3458	1.0859	0.844	0.938	1.2975	1.1958	1.1115	0.9274	0.6823	1.3743	1.168
AC005264.1	0.9581	0.6975	1.381	0.1505	0.2015	0.4874	2.0546	0.0974	0.0729	0.7275	0.1047	0.6361	0.3319	0.4556	1.5078	1.1745	0.0619	0.1775	0.8456	0.6926	0.7099	0.6085	0.4128	0.9261	0.3531	0.0992	0.0499	0	0.4923	1.0865	0.1578	0.1197	0.1289	0.3627	0.3961	0.501	0.0441	0.279	0.1211	0.0951	0.6192	0.3814	0.2148	1.8226	0.6116	0.2841	0.1827	0.2495	0.342
AC005332.5	3.172	3.2246	5.2425	3.5005	1.8797	4.2635	4.7205	2.1304	2.3475	5.5017	1.7464	3.9041	2.2949	3.7667	5.0387	1.8434	2.0206	1.8307	3.029	0.829	3.8695	3.431	4.5187	6.5089	4.3905	2.4227	2.4096	3.7844	3.2143	3.7597	5.084	2.2331	1.6394	4.3933	3.7735	4.2837	1.2085	2.2364	1.32	7.2137	3.341	1.8686	0.8405	4.0792	2.6872	1.4455	3.6461	4.1405	3.0767
ANKRD10-IT1	40.5994	27.2951	38.939	32.0377	14.6633	31.6057	17.8674	6.9446	4.8576	41.4365	15.4831	4.8296	12.7305	27.4055	37.6234	14.2704	5.2932	5.9158	27.2644	12.2815	27.0457	51.9464	7.0714	30.3056	26.8526	15.2425	4.5524	8.3509	35.5359	34.985	21.345	14.8351	11.8636	32.142	32.7585	16.2788	11.8832	11.248	10.9307	18.1863	33.7768	15.5409	8.2849	28.6531	26.5932	14.8258	5.2549	13.3289	24.6153
CERS3-AS1	1.5592	0.6937	0.7151	0	0.4847	0.0974	0.797	0.715	0.7071	3.4596	0.0221	1.9556	0.808	1.4419	2.1706	1.3602	0.3526	0.2246	0.1092	0.8251	2.2251	1.1939	0.19	0	2.043	0.1256	0.5995	0.4623	0	0	3.1625	0.3031	0.4079	1.6397	0.7079	0.37	0.2046	0.931	0.1971	0.0301	0.57	0.6438	0.2091	1.5173	0	0.4111	0.1067	1.4438	0.3012
LINC01802	0	0.2209	0.1392	0.1907	0	0	0	0	0.1077	0.0872	115.786	0.1343	0	0	0	0	0	0	0.153	0.7225	0	0	0	0	0	0	0.1105	0	0	0.1302	0.1166	0.1327	0	0	0	0	0	0	0.0767	0	0.2496	0	20.8774	0	0.4931	0.18	0	0	0
AP000345.2	3.3275	1.7457	10.3687	0.2768	0.8647	3.5222	46.2445	0.3761	0.1042	1.392	0.3745	2.2745	0.9312	1.1607	4.5666	0.4825	0.1328	1.0787	1.4068	0.6118	1.958	4.9604	0.2415	1.8821	6.6362	0.8939	1.6578	0.9575	1.7251	0.315	0.9027	0.3852	0	0.2223	2.8492	0.7166	0.1576	0.4897	1.0019	2.9569	2.6567	2.0457	0.2481	6.1994	0	0	2.6228	0.1529	0.1914
AL121603.2	1.4992	2.0375	2.441	1.6488	3.8192	3.007	1.3613	3.0724	1.9687	2.0892	1.587	6.0061	2.9648	2.9634	3.4006	3.4765	1.3561	1.4904	1.9661	3.6593	2.481	5.9657	2.0967	2.7496	3.5359	1.8041	2.8672	1.8668	1.4022	5.4362	1.0371	4.098	3.0359	2.469	2.5269	1.5093	2.2533	1.3613	1.9895	1.614	1.5724	2.2748	0.6153	4.9463	6.0296	4.2241	1.447	3.0456	1.5639
GABPB1-IT1	9.9619	5.2445	12.9944	4.0558	3.7698	8.162	5.6476	4.9543	6.5387	9.2949	5.8334	6.1524	6.2549	5.1595	8.5153	8.7034	6.6371	4.9191	7.6517	6.871	6.5482	6.4531	5.8747	10.824	6.9146	5.7228	5.0336	3.5409	5.9404	10.3651	6.5143	10.646	5.41	8.1511	6.939	5.539	2.2137	7.7511	4.4743	20.4965	11.4656	6.6257	2.03	10.5377	10.6831	9.6101	5.3343	5.5376	6.2387
SNHG11	4.7696	4.0597	8.4605	6.2702	3.0572	4.2993	5.2988	4.0427	9.2103	6.2375	11.0299	6.9395	4.5014	6.3483	3.4395	3.8548	4.0288	3.4712	4.3515	3.7372	4.4524	5.317	5.7317	4.4212	6.2121	2.9389	4.8036	3.2023	4.1548	3.5516	4.4206	3.0829	4.4591	6.9041	6.0304	3.199	1.1596	4.2761	3.2622	9.9381	5.8418	4.9413	2.4469	7.8595	5.7843	4.0357	2.2686	5.736	5.0226
AC009902.2	1.2074	0.6043	0.4153	0.5691	0.1333	0.3395	0.1096	0.0644	0.3214	0.6505	0	0.1002	0.4223	0.3768	0.2934	0.5787	0.3072	0.1957	0.2284	0.9434	0.5592	0.9058	0.6208	0.0806	0.9455	0.5908	0.1649	0	0.38	1.7486	0	0.396	1.1727	1.5427	0.4625	0.4834	0.5347	0.4195	0.2289	0.0786	0.3724	0.1402	0	0.9234	0.9197	0.4028	0.2789	0.3538	0.1476
AL157400.4	1.7448	1.1548	2.728	0.9719	0.3503	0.7136	0.5185	0.2709	0.5066	1.2989	1.7599	0	0.1775	0.396	0.7195	0.4344	0	0.2057	0.36	0.8498	0.7052	0.6347	0	1.1015	1.6367	0.207	0.0867	0.4232	0.9129	0.6126	1.0058	0.3122	0.8963	1.3511	2.0253	0.4355	0.0511	0.7936	0.7818	1.983	1.1743	0.442	0.919	0.7421	0	0	0.2932	1.1153	0.7756
AC109322.1	1.5066	0.7312	2.5336	1.6569	0.7395	0.8943	1.5808	0.6432	0.8466	1.948	1.7293	2.1119	0.5153	1.4629	1.8442	0.2751	0.3407	8.5194	1.2032	0.8222	0.7442	0.7256	1.1705	0.8048	0.7711	0.5097	1.1891	1.2655	0.5721	6.5188	2.3642	0.9883	0.6504	1.521	1.3252	0.9958	0.4044	0.6049	0.5078	4.796	1.9622	1.3218	0.5759	1.5665	1.7341	0.9681	1.0571	2.2234	1.0368
AC007216.1	4.2248	0.4486	1.6954	0.083	0.1555	0.297	7.8	0.1503	0.0937	2.3519	0	0.2338	0.0985	0.1099	4.9054	0.7714	0	0.4565	2.2641	0.4716	1.0435	0.9392	2.317	4.7017	3.7625	0.2297	0.0962	0.3131	1.4564	1.9262	0.6088	0	0.2487	0.2999	0.8092	0.4028	0	0.5872	0.1335	4.4932	2.4978	0.1635	1.0837	1.1404	0	0	0.7591	0.1375	0.4591
AC127502.2	8.5951	4.2427	4.0865	12.8531	1.8289	5.5419	9.0545	1.1143	8.2887	4.6548	4.4938	5.7669	4.1053	12.7243	11.7818	2.9826	2.9613	3.0342	10.2989	3.7371	9.1698	9.6335	2.4063	5.9134	8.3912	1.3897	2.213	2.1613	6.7503	10.1089	4.332	1.1808	2.384	11.3206	13.7213	3.2948	1.7102	5.3785	2.0304	3.8443	6.4964	10.8064	2.1674	4.0166	0.0548	1.2012	2.8971	3.1643	11.0606
ZDHHC20-IT1	0.9618	1.7505	0.3308	2.0399	0.4249	0.9465	1.0479	0.5133	0.512	1.969	0.276	0.7983	0.8074	0.6003	1.2466	0.6585	0	0.3118	1.0005	0.2147	0.3563	0	0.3956	0.7706	1.0633	0.4183	0.7883	0.4277	0.7784	0.9286	0.4158	0.1577	0.3397	2.7308	0.614	0.7702	0.3098	0.2673	0.1823	1.1272	0.2967	0.4467	0.0871	0.6923	0	0	0.2963	3.5694	0.8622
AC005899.6	4.2746	4.0197	3.1858	2.5184	0.6294	3.4053	10.4794	0.1521	0.3793	7.0622	3.6799	6.1497	1.5949	2.6682	6.4638	0.7805	0.4833	0.6928	4.312	0.3181	3.9593	3.3258	0.293	2.664	5.2508	1.2395	2.3357	0	3.5879	1.8343	4.9281	3.2716	0.2516	1.8206	6.9135	1.304	0.3442	1.1881	0.9454	2.5978	5.0545	1.9855	3.8699	8.718	1.3024	0	3.7307	0.8349	1.7418
AC017083.1	1.4049	0.2754	1.4869	0.4584	0.0955	0.3646	1.256	0.0923	0.0575	1.211	0.0827	1.0763	0.1814	0.4047	1.3306	0.296	0.0733	0.4204	0.9811	0.193	0.2402	0.2883	0	1.1545	1.354	0.141	0.5314	0	0.4276	1.3216	0.9967	0.2127	0.229	0.7978	1.0487	0.3956	0.1392	0.1802	0	0.7881	0.8667	0.3012	0.1957	0.35	0.1317	0	0.5992	0.1689	0.5284
TRAM2-AS1	7.0957	4.7362	5.8883	2.4692	4.2373	6.2169	1.7687	4.846	5.8984	3.7048	4.5499	4.2379	6.3114	1.9881	2.1916	5.234	5.648	2.4795	1.5212	9.2024	4.8022	3.5839	5.0684	6.2341	4.1602	3.359	3.9915	5.8625	2.1543	2.4538	1.3044	4.7517	3.3009	5.6217	5.6842	5.6612	2.6457	7.0004	4.6813	7.4308	4.3321	7.5228	2.3068	4.5323	1.9184	7.0465	2.0759	7.1101	2.4373
NIFK-AS1	5.0084	3.5257	7.2185	1.7558	2.1393	4.1198	2.5331	3.225	2.6662	4.2993	2.7239	4.741	3.359	2.4157	3.5274	4.8859	3.5521	3.9984	2.2469	4.2505	4.0178	4.8445	4.8692	4.5768	5.3997	3.4835	2.8497	3.1659	2.7396	4.6491	2.7081	5.6072	3.26	3.6903	3.6361	5.4455	1.3531	4.8321	1.9695	4.6141	4.1623	3.8548	1.9186	4.3798	4.2121	4.2536	2.3332	3.428	2.0644
AC007743.1	9.6619	3.3584	6.547	0.3652	3.5407	2.3694	2.2691	2.2331	0.5285	1.9308	0.7597	0.5628	2.6699	1.0278	2.3068	3.9262	1.692	0.7065	0.5496	2.6381	5.8853	6.3304	2.0717	0.3493	4.6938	1.4008	0.4896	0.2369	2.6394	1.2625	0.5444	2.7482	1.796	1.2926	4.9347	2.4157	0.4367	4.0519	1.4231	5.3735	0.6872	1.7659	0.9909	1.8215	0.2066	4.0721	1.3426	1.8541	0.8052
MIF-AS1	2.7238	1.8525	0.1972	0	1.2349	2.7812	2.4992	1.7443	0.1145	2.3169	5.1832	1.7134	2.2064	0	0	2.5128	0.6321	1.5335	0	1.0241	1.3278	3.2983	1.1793	1.1487	2.0603	1.4341	0.3917	1.5937	1.2634	2.5836	1.4461	1.4577	0.5569	0.5291	0.2929	0.8528	0.3232	2.4705	0.2446	2.2029	1.9015	2.7301	1.2978	1.8832	4.8919	4.1454	0.8169	1.5121	0.9113
AC022400.1	1.902	0.7789	2.1263	1.4567	0.3151	1.3369	1.5543	0.7105	0.5062	1.6395	0.1819	0.7893	1.3306	0.4452	0.7704	0.5209	0.3226	1.0789	0.5396	0.2123	1.057	0.9513	1.5646	1.016	1.4894	0.7238	0.2598	0.8458	1.1118	1.0712	0.5482	0.6239	0.6717	2.4301	1.9428	0.7615	0	1.0573	0.5408	1.1146	1.4667	0.6626	0.8609	1.7113	0	2.3269	0.4394	2.0433	0.775
AL118516.1	7.2636	9.6566	27.5924	10.8659	2.2322	9.5011	10.323	6	5.4639	17.8986	12.204	18.5582	8.0422	10.4477	20.9779	6.4005	7.2844	13.6155	7.5861	10.4343	15.5617	19.6923	2.2083	8.7723	13.0346	1.5109	10.699	6.1794	6.5322	78.4645	12.8343	4.765	3.3462	23.9418	14.6781	10.0438	2.136	5.0035	2.5145	21.6327	12.2745	10.635	3.5453	7.3313	9.6221	13.347	11.7222	8.0192	8.5446
AC006378.1	0.5127	0.6066	0.4115	1.8125	0.5663	0.4085	0.8691	0.3831	0.1365	3.2596	0.3433	0.9646	0.8131	0.3467	1.7722	0.2575	0.1739	0.4155	0.9052	0.4197	0.285	1.5103	0.1758	0.8217	0.6456	0.1673	0.4903	0.228	0.4304	0.5501	1.0591	0.4485	0.1509	0.825	1.0257	0.352	0.3991	0.3801	0.2106	0.3784	0.8435	0.3969	0.0774	1.1534	0	0.5703	0.3949	0.6009	0.4318
TPT1-AS1	2.6781	2.9087	4.7592	3.9828	1.7117	2.5196	3.6681	1.9814	1.4451	5.485	2.5603	2.3258	1.7358	2.1773	5.6418	1.8387	0.9059	1.2111	2.0013	2.3589	2.8226	5.1342	1.4768	2.2258	4.101	2.0091	1.5272	2.2132	2.2024	9.7416	1.4092	2.001	1.0103	2.4988	2.5978	1.5995	0.9236	2.0405	0.7138	1.6839	3.534	2.1795	1.7414	3.8293	4.8647	2.0582	1.6993	2.0582	1.3963
AC114284.1	1.8044	0.726	0.588	0.6714	0.5454	0.6943	0.1725	1.2569	0.455	0.6958	0.0727	0.1261	0.6378	0.1186	0.7386	0.4682	0.6443	0.6773	0.1796	1.5265	0.7037	0.4433	0.625	0.4058	0.63	0.3718	0.1038	0	0.3758	1.0392	0.3285	1.3706	1.2746	1.7258	0.6306	0.8257	0.7035	1.3727	0.3241	0	0.4687	0.3529	0.3439	0.376	0	2.7885	0.5851	0.4452	0.8049
AC114956.1	1.2398	0.3761	0.9951	0.7791	0.1826	0.6972	0.5253	0.2647	0	1.2468	0.1581	0.1372	0.3469	1.9347	2.2765	0.2264	0.2804	0	0.8598	0	0.4593	0.1378	0.34	0.9934	0.9899	0.2696	0	0	0.9663	1.33	1.7867	0	0.4379	0.8214	0.5277	0.3782	0	0.4595	0.0783	0.4305	0.3824	0.2879	0.1497	0.5206	0.5037	0	0.3819	0.1614	0.3368
PRR34-AS1	2.1295	2.6778	7.2583	2.6004	6.7559	3.3747	5.9061	1.1984	2.4218	3.8797	9.1475	4.6918	2.5462	5.196	2.4464	1.9617	2.2326	4.33	3.4785	3.7167	4.0882	2.8403	4.4591	6.2046	4.2447	1.7682	7.4575	4.5627	4.9443	12.9591	3.4036	3.5559	1.5042	3.5179	3.3123	4.5179	1.247	3.928	4.3673	9.2774	3.8218	5.4401	2.5588	2.1251	61.9321	0.9473	3.5481	3.1763	3.8495
AL355916.1	0.9984	0.3231	1.2465	0.2789	0.3594	0.5615	0.3492	0.2842	0.5315	0.255	0.7357	0.2946	0.4553	0.2308	0.2876	0.5672	0.2509	0.5035	0.4896	0.9906	0.3836	0.4932	0.2129	0.237	0.6541	0.3538	0.3637	0.2631	0.2394	11.663	0.2345	0.5094	0.4702	1.008	0.3588	0.5076	0.6312	0.4934	0.2243	0.9439	0.5703	0.5325	0.1339	0.5723	0	1.2503	0.4215	0.809	0.3857
AL365181.4	0.5802	0.1408	1.3306	0	0.1709	1.3051	0.281	0.0826	0	1.3337	0	0.3853	0.3247	0	1.0027	1.2713	0	0.3762	0.8048	1.3817	1.0032	1.1609	0.1591	0.2066	0.4277	0.4206	0.4227	0	0.0696	0	0.1115	0.2538	0.1366	0.2197	0.2964	0.177	0.8721	0.6451	0.1467	0	0.358	0.2695	0.07	0.7657	3.0643	0.8604	0.1787	0.4533	0.1261
AC025766.1	3.8801	1.3182	3.737	4.9986	0.3428	0.4364	0.5637	0.8835	0.1377	2.0067	0.9897	0	2.0268	2.9063	2.0116	1.4169	0.351	1.1739	2.4463	0.462	1.725	0.1725	0.8512	1.2436	3.0504	0.225	0.1413	0.2301	2.7915	1.4985	2.3857	0	0.9136	3.3785	3.0386	1.1837	0	0.8628	0.9808	2.0211	3.83	1.2015	0.4684	1.2103	0	0	0.7171	1.0105	1.9394
AL009178.2	0.3891	0.3824	0.9637	0.4035	0.0688	0.2626	0.3533	0.1827	0.0829	0.1677	4.6746	0.3875	0.5662	0.0729	0	0.8312	0.2112	0.3279	0.2944	0.3822	0.3171	0.3633	0.9603	0.1247	1.2045	0.8969	0.2977	0.173	0.2519	0.1002	0.2692	0.6381	0.8795	0.8175	0.1987	0.1602	0.2005	0.3461	0.0443	3.4659	0.3841	0.3615	0.7468	1.2464	0.2371	1.8695	0.3236	0.4256	1.1035
AP000757.1	2.3125	1.894	1.2429	0.545	0.3512	1.5849	1.5223	0.2777	0.0385	2.4605	93.7314	0.5278	0.8089	0.4962	1.5455	1.3854	0.1961	0.2343	0.9568	0.5162	0.3213	2.2169	4.4587	0.7334	3.5153	2.0116	0.7897	0.8998	0.8838	0.093	1.1247	1.517	0.7657	0.9849	1.7716	1.0251	0.2793	0.241	1.2878	3.7643	1.2483	0.6042	10.8079	1.6906	0.4404	0.643	0.3339	0.2258	0.2827
ZNF503-AS2	3.8868	2.6917	3.4783	0.7447	1.1865	2.2212	2.6971	1.9022	1.0093	4.3309	11.3045	2.7067	2.812	1.2032	0.9215	2.1636	2.3795	2.6633	0.8248	1.8624	2.2947	0.9062	2.0017	4.2031	1.9913	1.6218	3.0044	3.2039	1.0458	1.3831	1.2751	5.0581	1.808	1.633	3.6636	2.3281	0.5089	2.512	0.9465	11.2261	1.6376	2.0402	7.5525	2.013	3.8897	1.6588	1.5379	2.7899	1.5451
FLJ20021	19.2844	15.2096	17.0442	7.3218	9.9387	15.2121	17.4126	10.9776	10.6937	27.8778	26.1318	23.5644	11.9173	12.0372	24.8212	27.7284	12.9917	14.4993	10.8412	14.1111	14.5871	11.6104	10.1355	11.0166	12.8313	15.6102	15.806	10.8388	4.5283	21.636	18.4501	20.1183	9.0813	10.3426	14.4321	12.9918	4.615	13.1027	5.9408	13.324	7.0226	14.1825	7.9533	9.9772	66.7534	27.8821	23.926	10.7772	5.7624
AC097641.2	1.14	1.079	0.6274	2.0419	0.3022	0.6411	0.7453	0.292	0.3641	1.2775	1.3086	0.6056	0.3828	1.7079	0.4433	0	0.3094	0.1478	1.1213	0.4072	0.8448	0.7603	0.1876	0.4872	1.0923	0.4959	0.3738	0	0.4921	2.2014	0.7886	0.2992	0.1611	1.1653	0.9316	0.313	0	0.2535	0.3458	0.7126	1.1253	0.8473	0.3303	1.6413	0	0	0.7023	0.1781	1.0406
AC020779.2	1.6152	1.5679	2.9632	0	0.7135	1.3624	0.88	0.5747	0.8598	0.9282	1.545	1.7875	1.808	1.0082	0.5234	0.7373	0	1.0472	0.2037	1.6827	1.1968	0.8977	0.4429	0.2876	2.5793	0.3513	0	0.2394	0.9684	0.1733	0	0.3532	0	0	4.1248	1.2319	0.0867	0.449	0.1021	5.3287	1.1626	1.3755	0.2925	1.5502	0	0.2395	0.0829	0.4207	0.5265
AC138466.1	1.0823	0.2955	0.5584	0.5101	0.1195	0.6086	0.7862	0.9242	0.144	0.6997	1.3458	1.617	0.4543	0.1689	0	0.4446	1.652	1.2279	0.7165	0.2416	1.0025	0	0	0.1445	2.6922	0.4707	0.2957	0.2407	0.0973	0.3483	0.3119	0.71	0.1911	0.1537	1.7966	1.4858	0	0	0.513	1.2685	1.5024	0.2514	0.3919	0.4869	0	0.963	0.5001	0.2114	0.3528
AP001363.2	1.6235	1.9699	2.606	0	0.5976	1.978	2.0637	2.1949	0.7202	4.0816	0.6212	8.6239	0.7572	1.0134	4.2084	3.1124	0.5507	2.6313	1.74	0.7249	1.8045	0.7218	0.6678	0.2891	1.6951	2.0007	1.4785	3.1285	0.876	3.1349	3.1195	3.1951	0.3823	1.5365	1.382	1.1144	0.5229	1.0529	0.7181	1.8323	0.6677	0.377	0.196	1.4608	35.6143	1.926	2.2504	0.6342	0.0882
LINC02009	0.0359	0.0914	0.3946	0.1014	0.0158	0.4234	0.3385	0.0306	0	0.17	2.5514	0.2142	0.2207	1.0741	0.0465	0.2749	0	0.6508	0.2848	0.064	0.2657	0.1913	0.9733	0.0192	0.0925	0.1403	0	0	0.0129	0.0231	0.124	1.6933	0.2786	0.3461	0.2197	0.0492	0.0462	0.0199	0.734	0.056	0.5087	6.561	3.5053	0.3355	0.1748	0.0638	0.1104	0.3641	0.1519
AL137785.1	0	0.2358	0.1485	0	0.2861	0	0.1568	0.0922	0.2299	0.0931	1.2391	0	0.1208	0.1348	0	0	0	0	0	0.1928	0	1.2959	1.0657	0	0.3183	0.0939	0	0	0	5.281	0.4978	0	0	0.2452	0.1103	0	0.0695	0	0.0819	0	0.1332	0.1003	1.0946	0.2331	0	0.5763	0	0	0.2111
AL445423.1	0.3948	0.7185	0.9505	0.4652	1.2207	0.9989	0.5735	2.4438	1.1558	2.2969	0.0755	1.8348	1.1047	1.4784	3.1979	2.2705	0.2678	0.128	1.8667	3.5251	0.8775	0.5265	1.299	0.2109	0.4364	0.5151	1.1864	0	0.923	2.4139	0.4551	2.4602	0.5577	3.1384	0.4032	0.7226	1.2078	0.5486	0.2993	1.0282	1.7048	0.4584	0.143	1.0656	4.8111	2.8099	0.7904	1.3879	2.1876
AL354760.1	1.1518	0.7187	1.4715	1.0081	1.0176	0.2776	1.5537	0.562	0.3504	4.4675	0.2518	1.9665	0.1842	1.2324	1.9193	0.3605	0.2232	0.96	2.6141	0.5877	1.3411	1.5362	0.1354	1.6699	1.6977	0.2147	0.2697	0.7317	0.8286	1.165	3.1299	0.6476	0.5811	0.3737	0.5042	1.0541	0.4239	0.6403	0.7486	0.7714	2.2332	0.8407	0.1192	0.8883	0	0	1.7739	0.7713	0.8582
LINC02343	0	0.0144	0	0.0559	0	0.1556	0.0718	0	0.021	0.2045	1.8606	0	0.0221	0	0	0	0	0	0	0.2471	0	0	0	0.0211	0.0146	0	0	0.0352	0	0.0509	0.0228	1.3487	0	0	0	0.0181	0	0	0	0	0.0976	0	0	0.0569	0.1927	0	0	0.0309	0.0516
YTHDF3-AS1	2.5049	1.2337	3.852	2.1529	0.7811	2.8172	1.4449	1.5098	1.0982	2.2227	3.439	5.8704	2.2266	4.0469	1.3369	3.2285	1.3995	2.0061	1.9509	0.921	2.5112	1.9653	3.6365	1.1019	2.172	1.2818	3.4621	3.0142	1.6431	10.5276	2.718	2.6099	1.249	7.5307	2.0319	1.7531	0.4271	0.9829	1.1173	6.6777	1.7272	2.6692	0.4269	2.5986	13.2888	1.8354	1.7701	2.763	1.1528
AC012360.2	6.7645	1.7729	2.2338	1.9129	1.5539	1.8259	1.8672	1.2707	1.2964	3.1487	3.7269	2.695	2.7259	1.3511	1.7535	1.4821	2.7534	4.7364	3.2754	2.4162	2.0049	0.7218	2.8937	2.4571	1.6951	2.3537	1.922	0.9626	1.168	8.0115	4.2113	3.1951	2.1024	1.8438	2.9021	1.9811	1.6558	1.3538	1.4363	6.4835	1.1685	3.2677	4.3113	1.5581	16.1583	0.963	1.3336	2.3255	4.6748
AP001527.2	0.503	0.061	0.9228	0.3951	0.0741	0.5657	0.9134	0.4295	0.5355	1.4452	0.8981	0.4453	0.3754	0.4186	1.1952	0.3674	0.6825	1.5218	0.444	0.2994	0.1242	1.0063	1.3793	1.0747	0.3089	0.0729	0.0916	0	0.5428	6.1514	3.9626	0.33	0.5922	1.2378	0.1713	0.3069	0	0.0932	0.5721	2.7948	1.1378	0.5451	0.2429	0.6638	2.0434	0.4475	0.2066	0.655	0.2186
AL139287.1	35.0828	16.0631	41.6712	14.4683	10.5337	16.0292	27.9723	4.5636	3.064	41.699	8.1796	6.1877	12.5787	15.2262	24.8671	7.0562	2.975	6.0416	15.6559	5.874	28.839	31.8048	3.3821	17.4227	27.069	5.6029	2.8455	2.1939	19.6202	26.1099	18.4853	5.9335	5.6145	19.1442	33.3167	10.0337	2.2951	7.7706	6.2352	5.8536	21.8128	10.9485	3.9701	26.6343	11.3571	4.6334	10.6378	8.1375	8.0411
AL121987.2	0.6034	0.7078	1.7988	0.316	1.3624	0.9425	1.3636	0.2862	0.1428	0.8091	0.2052	0.8013	0.1501	0.4185	1.5207	0.5141	0.2729	0.2608	0.4058	0.2993	0.5465	1.7438	0.1655	0.8595	0.7659	0.3499	0.1099	0.2981	0.3618	1.0789	0.2705	0.2199	0.2842	0.4188	1.7121	0.5829	0.0432	0.2609	0.3305	0.7334	0.6618	0.3737	0.17	1.5443	0	0.179	0.475	0.6286	0.3934
AC141002.1	3.4128	1.3803	5.4783	1.966	0.335	2.5588	2.479	0.8095	0.6056	1.4709	1.4508	0	1.4856	1.4202	2.7032	0.4154	0	0.7375	1.0041	1.0158	0.8429	1.2644	0	1.6205	0.559	0.9896	0	0.3373	0.4092	1.9526	0.4372	1.2438	0.5357	2.7994	3.8735	1.3882	0.8549	0.2108	0.7189	2.7654	1.1697	1.9375	0.6866	2.1836	1.3864	0	1.2849	0.8888	0.8653
AL021368.2	2.5896	1.3888	2.3119	1.118	0.227	0.8226	0.5887	0.6836	0.6209	1.5591	0.7412	0.5513	0.863	0.5799	1.3195	0.6605	0.2682	0.3717	0.7328	1.3415	0.8349	1.6083	0.3578	0.7075	1.3914	0.705	0.2808	0.1582	1.0026	0.6616	0.3874	0.7651	0.5865	1.8073	2.201	0.597	0.191	1.044	0.2998	1.0709	1.3171	0.9182	0.451	1.4585	0	0.3694	0.2679	0.5251	0.5864
AC010503.4	94.8786	71.7055	104.837	1.8844	86.3387	106.966	139.233	76.681	91.1105	125.856	75.9564	182.054	30.9829	110.766	56.1053	39.9254	94.2012	73.1755	36.7635	61.3798	69.8476	93.9371	42.125	117.135	82.6783	63.8726	119.735	115.157	103.44	0.198	43.4346	53.1625	13.9035	16.1548	94.9534	87.8889	12.0347	123.61	52.0067	77.9389	63.7513	53.9266	11.527	90.4886	114.132	41.0458	96.3928	63.9172	22.8078
AL021707.4	1.5482	0.9393	2.8403	0.8513	0.228	1.5962	1.4995	0.2203	0.1374	1.4458	1.8758	0.1713	0.7221	2.0939	2.8428	0	0.1751	0.1673	0.4881	0.2304	1.5296	1.0325	0.8491	1.1027	2.7576	0.8979	0	0.2295	1.021	1.4948	1.9337	0.3386	0.9114	0.7327	2.8994	0.4723	0.0831	0.2869	0.4892	2.285	1.1144	0.3596	1.3082	2.6004	0	0	0.3179	0.4032	0.6729
AC087521.1	1.5003	0.9416	0.6762	0.1707	0.7085	2.1237	1.3528	0.7731	0.2754	0.6466	0.1584	0.2405	0.1737	0.1615	0.4694	1.842	0.2808	0.3689	1.5852	0.9701	1.1884	2.1391	0.4256	0.1934	0.305	1.4851	0.1413	0.138	0.4466	0.0666	0.1789	1.1878	0.7674	0.8226	1.0305	0.6629	0.3999	0.4602	0.6473	0.2425	0.2234	0.3124	0.637	1.4896	0.1891	1.565	1.0358	0.7276	0.3373
ZBED5-AS1	6.8553	4.4968	6.5994	3.2961	5.5384	7.6323	6.0156	4.9991	3.9433	7.3665	16.9783	12.9224	8.137	6.8062	4.8749	5.7207	4.4945	5.3243	3.768	7.087	4.5171	5.2621	5.3934	5.2225	9.2827	5.7431	7.8436	11.703	6.4049	15.3252	4.8534	6.957	5.5898	6.8191	8.4124	6.4003	3.949	7.6346	6.1142	5.8956	6.1026	9.4029	3.9403	9.1819	4.8782	5.8743	7.2136	5.9852	3.6894
ZNF582-AS1	2.4544	1.061	5.0656	0.3856	0.4066	1.8978	2.0429	0.7859	0.1905	0.8595	5.2824	1.0186	1.7744	0.766	0.729	1.7646	0.3469	0.7293	1.5088	1.3698	1.1367	0.9889	0.5889	1.0106	1.451	1.6458	0.447	0.5912	0.4599	3.8179	0.7369	2.4823	0.8308	0.6098	1.2014	1.5677	0.6093	2.9847	0.6398	5.194	1.7035	0.9263	2.4998	1.5459	1.8696	2.7753	1.8114	0.4794	0.8501
SNHG7	37.5079	15.4724	37.9615	30.1468	14.83	10.9474	7.0627	16.4106	7.4963	45.6811	14.6322	34.5569	25.8953	6.1703	12.6583	33.7681	15.3934	9.7184	5.0159	15.7616	31.4792	12.2906	15.6236	10.561	18.5571	11.5908	26.9956	8.5034	9.0027	7.6159	4.813	44.7414	7.4105	7.5298	14.2295	8.0572	1.8322	16.1613	5.5359	3.5606	9.0878	12.9308	12.2745	15.1888	11.6784	18.1104	15.6714	5.7968	5.6692
AP002840.2	9.5878	2.8884	11.7135	2.1036	5.5499	5.7634	3.4222	2.9642	1.32	8.5495	3.4786	6.2565	7.7716	5.8815	3.7495	3.1692	2.4672	3.4295	2.939	1.4761	5.757	4.7404	3.5357	4.8567	5.2389	2.8759	4.3357	6.322	2.0813	4.7881	2.5728	2.2773	4.3204	1.2203	5.91	4.7656	1.2778	11.2112	2.6951	5.6832	6.017	12.2085	1.3768	3.9862	8.8644	1.0296	2.6988	5.6829	2.9099
AC011479.2	0.4898	1.0698	0.337	1.9622	0.4327	0.6886	0.8895	0.6273	0.3911	0.9499	0.5622	0.1626	0.4112	2.7516	2.2219	0	0	0	0.7411	0	0.5444	2.4498	0	0.1308	0.9927	0.1065	0	0.2178	1.5857	2.2069	0.2823	0.3213	0.173	0.5563	3.8775	1.3448	0.3155	0.2723	0.65	0.5103	0.9065	0.1138	0.3547	0.9696	0	0	0.2263	0	0.1597
AC009486.1	0.6507	0.9948	1.6114	0	0.6323	2.6344	0.2836	0.8334	0	1.1217	0.1494	0	0.5827	0.2437	1.265	0.499	0.2648	0.5906	0.2461	0.9296	0.3857	0.6075	0.2141	0.4866	0.8632	0.4528	0	0	0.4213	0.2513	0.4501	1.1098	0.1838	0.5173	2.3927	1.4292	0	1.3021	0.2467	0.3389	0.3211	0.4836	0.1414	0.8899	0	1.7367	0.1603	0.1017	0.2545
AL117336.1	6.632	4.4834	4.5625	5.0608	3.9063	3.7294	4.8174	2.1573	1.345	4.6278	4.7124	2.7261	2.121	2.7598	10.4378	3.6327	2.7852	0.6142	17.0836	3.1021	1.6381	12.2156	1.299	3.7114	4.1897	2.3351	1.8982	1.4044	3.5217	8.9441	2.9127	4.5579	2.677	8.7876	5.3228	3.4684	4.5771	1.7556	1.5566	2.7966	3.1173	4.4007	4.2315	11.3663	0	2.2479	1.9456	5.6752	3.3973
AC010531.3	2.0623	0.8258	0.5675	1.458	0.2733	0.116	1.1984	0.2641	0.7685	0.7111	1.2625	0	0	0	0.9355	0.5648	0.1399	0	1.0922	0.9208	3.3619	2.7507	0.1697	0.7711	0.912	0.8073	0	0.9171	0.2967	0.531	0.2378	0.8117	0.437	1.4053	3.1599	0.6606	0.5314	0	0.2346	1.0743	0.6362	0.3832	0.5228	1.1876	0	0.734	0.8258	0	0.4034
AL031705.1	0.6205	0.7906	0.4269	0.4387	0.2056	0.5234	1.1268	0.0662	0.2477	0.8692	0.2968	0.515	0.2605	0.3873	1.1058	0.085	0.2105	0.1006	0.6455	0.277	0.4598	1.0345	0.1276	1.1601	0.9147	0.1349	0.0848	0	0.7812	0.2995	0.8942	0.2035	0.2192	0.7047	0.8715	0.4259	0.05	0.0862	0.0588	0.2424	0.8613	0.2162	0.1685	1.1166	1.1343	0	0.3345	0.1212	0.5562
AC023669.2	0	0.3223	0	0	0.9777	0.2489	0.3215	0	0.2356	0	0	0	2.4775	5.5261	1.1475	0.7274	0	0	0.1675	3.5576	8.8562	1.7713	0	1.4188	0.4894	4.6208	0	3.937	0	0.2849	1.2759	79.5675	0	0	0.2261	0	0	1.2304	2.3497	0	0	1.8505	0	1.9118	0	3.5447	0.1364	0	0.1443
AC005224.3	0.4483	0.5828	0.1762	2.0223	0.4526	0.3961	0.1163	0.2461	0.3409	0.276	0.2695	0.5953	0.4301	0.1599	0.2075	0.456	0.1303	0.2906	0.6541	0.1716	0.3322	0.1708	0.2634	0.0684	0.1888	0.8356	0.2799	0.2278	0.5759	4.1633	1.1444	0.5462	1.1309	1.091	0.2617	0.1758	0	0.178	0.2671	0.2335	0.8297	0.2082	0.116	0.461	0	0.3419	0.0789	0.3002	2.0876
ZNF32-AS1	1.9502	1.1536	1.3416	1.1489	0.7538	2.0562	2.0363	1.353	0.2595	2.2063	0.4663	1.2949	1.5008	1.5216	2.3697	1.6023	0.3307	0.7902	3.4119	0.8707	1.445	0.8128	0.4011	4.0367	2.156	0.9542	0.666	1.5177	0.8769	1.5691	2.5294	1.2793	0.5166	1.6612	1.8676	0.4462	0.2355	1.4907	0.0924	2.0317	1.5039	1.1323	0.1766	2.1056	0.2971	0.8676	0.5256	1.5237	1.5893
LINC02182	0.4906	0.2976	1.7999	0	1.6614	0.4598	0.7721	0	0.2611	0.2819	0.0626	2.4972	0.6406	1.2248	2.6492	0.8957	0	0.8481	0.2474	0.8761	0.9693	1.6358	0.269	1.3102	3.3142	0.2845	0.8041	0.1454	0.0588	0	0.1885	1.0727	0.1155	0	0.0835	0.3741	0	1.3635	0.434	12.4359	0.9079	0.6836	0	4.5316	4.7828	0.8729	0.9066	2.1719	1.8656
AC025754.2	0.2449	0.624	0.6739	0.3463	0.6491	0.4131	0.8895	0.3137	0.1304	0.9499	0.7496	2.2766	0.5483	0.9172	2.0632	1.0732	0.9968	2.8579	0.9264	0.8747	2.1776	1.4699	1.2088	0.7849	1.1732	1.2782	2.8102	0.6534	0.7048	0.3153	0.9882	2.2492	1.3839	1.1126	1.3759	0.7845	1.1042	2.0421	0.2786	1.6584	0.6043	0.91	0.3547	0.9696	6.2678	2.8327	1.6596	1.3394	0.6387
AC087623.2	0.6745	0.6313	2.32	0.9537	0.7662	0.3793	0.7349	0.9461	1.4362	0.8306	0.7742	0.8317	0.5932	1.1427	0.6869	0.7917	0.9151	0.5622	0.6925	0.4302	0.9282	0.8996	1.3475	1.1838	0.6036	0.3353	1.1056	0.857	0.4159	2.1087	0.8331	0.8849	1.3612	0.7113	0.5905	1.1905	0.1862	0.2678	0.8037	3.5134	0.8917	0.6713	0.663	0.9363	5.2843	0.6001	0.5342	1.4304	0.6596
AL109917.1	3.3864	1.6153	1.3657	1.2108	0.3611	0.985	1.5692	0.2493	0.0622	1.4092	1.6978	4.187	0.5882	0.5102	0.6054	0.9595	0.3961	0.9085	1.2369	1.0427	1.2114	0	0.0961	0.0624	1.9795	1.0666	0.4466	0.5193	0.294	3.8333	0.6058	0.6128	0.9073	1.4589	1.7892	0.9618	0.677	0.3246	0	0.4866	0.2882	1.0848	0.5497	0.6304	3.1309	1.5585	1.4748	0.0912	0.2284
AL596202.1	1.2676	1.0975	1.9327	0.4844	0.5297	1.8495	1.1572	0.2779	0.1641	1.388	1.6254	0.5687	0.6711	1.2617	1.7096	0.3941	0.7205	0.6886	0.8165	0.7954	0.9393	0.5712	0.5355	1.1896	0.8838	0.596	0.6178	1.036	0.6778	1.3231	1.0072	0.5169	0.4598	1.109	0.6124	0.7525	0.1214	1.1808	0.5456	1.6419	1.543	1.3845	0.9429	1.0234	0.1253	0.7621	0.7071	0.6692	0.9046
HCP5B	0.5601	1.4475	0.9247	0.0528	0	1.4802	0.9154	0.0717	0.2087	0.7724	0.0429	1.2272	0.8463	0.5244	1.1252	0.2761	0.266	0.7262	0.9534	0.5501	2.1995	0.3362	0.1382	0.7479	0.7224	0.4141	0.3978	0.3487	0.3223	0	0.0646	0	0.1187	0.5725	1.1728	0.4101	0.3247	0.2491	0.2761	0.1459	1.4166	0.1561	0.0811	2.056	0	0.0997	1.6044	0.3938	0.639
SLFNL1-AS1	1.3225	0.7141	1.8044	0.8207	0.7497	0.7437	1.3529	0.1317	0.1525	0.9974	0.2193	0.2049	0.4318	0.7292	0.7999	0.2173	0.0748	0.1286	0.542	0.5314	1.7475	3.7336	0.3989	0.5416	0.9178	0.393	0.0602	0.0784	0.9276	1.1208	0.6734	0.1301	0.3892	0.8511	2.2289	0.5346	0.1065	0.3308	0.5181	0.2296	0.6391	0.389	0.2315	0.8409	0	0.3334	0.3395	0.3616	0.3377
AC079305.1	0.424	0.2315	1.021	0.2998	0.281	0.3577	0.77	0.5431	0.5643	0.9138	1.0546	1.8301	0.4746	1.8528	1.7862	0.9291	0.2877	2.3367	0.6416	0.568	0.3142	0.707	1.5697	0.2265	0.3907	1.4754	1.1585	1.32	0.4576	0.6823	0.7333	0.6954	0.2995	3.4915	0.9746	0.5821	0.2049	0.5893	0.2412	3.6445	1.1772	0.7878	0.3071	0.5341	0	0.1886	0.4572	0.3313	0.5529
ZMIZ1-AS1	0.3725	0.7308	0.6834	1.19	0.4663	0.3259	0.3382	0.4506	0.5068	0.4995	0.4909	0.6046	0.2896	0.4392	0.2548	1.0429	0.1966	0.2818	0.7672	0.6283	0.5367	0.5383	0.2724	0.7517	0.3966	0.6841	0.2714	0.4234	0.4095	0.2797	1.3242	0.7196	0.3655	1.3985	0.2854	0.2083	0.4599	0.5983	0.306	0.5606	0.5618	0.7883	0.3747	0.365	0.2774	0.313	0.0892	0.6953	2.7525
AC024270.4	0.7697	0.1245	0.559	0.1411	0.2267	0.1683	0.2174	0.0913	0.1138	0.3686	0.2127	0.2272	0.3829	0.0801	0.194	0.2342	0.058	0.1109	0.55	0.2291	0.3486	0.2567	0.1759	0.1142	0.1733	0.5022	0.1636	0.1521	0.2615	0.6331	0.9614	0.2525	0.3323	0.4857	0.3495	0.1761	0.124	0.2615	0.227	0.3341	0.2374	0.2384	0.1703	0.2924	0	0.3044	0.2898	0.3007	0.3067
CTC-338M12.4	2.0028	0.6943	3.7179	1.7231	0.5477	1.019	0.5196	0.7329	0.7954	1.6715	1.7758	0.5277	1.0853	0.754	0.7005	0.6791	0.4098	1.0305	0.8177	0.511	1.4605	2.0777	0.6799	1.7321	1.5229	0.4701	0.469	0.4241	0.7433	0.7571	0.6047	0.6465	0.4042	1.0109	1.1528	0.611	0.1843	1.0957	0.2893	2.1693	1.4317	1.0189	0.6792	1.1213	0.1162	0.7071	0.4309	0.5961	0.3627
LINC01569	5.9595	4.3828	4.2528	5.9509	3.0342	3.8738	6.5227	1.8802	6.6246	5.1457	1.6927	7.2435	4.1042	5.6492	4.1239	2.9435	1.3431	2.5932	3.4007	2.4534	3.8471	10.1448	1.3627	2.7302	8.7772	2.3196	2.8811	4.5278	2.3763	3.4848	4.1224	1.0867	2.7256	6.4358	11.7417	1.3589	1.6461	2.2461	1.2179	4.083	3.0659	2.1207	0.6657	7.8088	1.428	1.6536	2.0846	2.3834	1.5607
AC073389.1	3.46	1.647	3.5705	0.8781	0.5291	1.0477	1.4983	0.909	0.6376	1.7207	1.5275	3.7112	1.3406	1.4952	0.6037	2.4784	0.632	2.502	0.6041	0.9507	0.5916	1.2425	0.5474	2.488	2.0107	1.1576	1.4543	0.9469	0.8138	2.0558	1.1507	1.2222	1.034	2.4938	1.9711	0.8526	0.2572	1.4056	0.7064	5.1991	1.5599	1.7926	0.6747	2.0116	1.784	0.3552	1.0658	0.8318	0.911
NCK1-DT	2.4925	1.6557	2.4282	1.2434	0.9002	1.7393	0.8524	1.1108	1.017	1.286	0.898	1.1839	1.8329	1.147	1.6035	0.8172	1.1972	1.2503	1.1081	0.9098	1.1594	1.0799	1.1674	1.2926	2.2662	1.0129	1.8889	1.424	1.4595	1.6746	1.699	0.8235	2.0434	2.0353	2.351	1.7067	0.6504	1.8003	0.9519	1.6111	1.7959	1.6479	0.5403	2.2853	0.2661	1.1655	0.8126	1.4073	1.3404
TMEM92-AS1	0.7053	1.6432	0.3882	11.0366	0.1869	0	0.4099	0.4818	5.2565	1.3375	0.1619	0.843	0.0789	5.5471	2.8339	0.6954	0	1.006	2.0811	1.0077	0	0.4704	1.0444	0.2261	0.3119	0.6749	0.3083	0.2509	0.7104	4.5398	3.3339	0.9254	0.7971	7.3696	0.1441	0.0646	0.9995	0.3137	0.4814	0.0735	2.2627	0.5242	0	0.66	4.6417	1.1296	0	1.1021	0.4138
AL023803.1	1.6973	0.4119	1.9461	0.5333	1.7495	1.5907	1.6438	0.7246	0.9035	0.4877	1.0823	4.5079	0.9499	0.7063	1.8332	0.9297	1.1514	5.135	1.9261	0	0.8384	1.1319	0.4654	0.6044	1.4594	0.7382	1.8548	1.0064	0.6105	6.5548	0.6523	1.1134	0.7993	1.2851	2.0227	0.7767	0.1822	0.629	0.429	3.8312	0.349	0.7884	0.2049	0.4072	59.9866	0	1.2199	0.442	0.5533
AC093227.1	2.9561	1.1893	0.7492	0.7333	0.3436	1.2249	0.9889	0.3985	0.5798	0.8047	1.131	0.2583	0.9143	1.311	1.0587	0.4687	0.4222	0.4035	0.5297	0.5557	1.7869	1.0376	0.512	1.0389	1.6914	0.7782	0.5101	0.4843	0.9794	1.0014	0.8968	0.3062	1.044	0.8835	1.4701	0.7476	0.1503	1.8163	0.6489	1.3372	1.1998	0.8672	0.9296	1.7359	0	0.6921	0.6709	0.547	0.3297
AC079906.1	0.6491	1.0868	1.3396	0.3671	0.5734	0.73	1.273	0.3879	0.2073	3.4687	0.9933	3.534	0.5812	0.4051	1.5143	0.1422	0.1761	0.505	0.9821	0.9273	0.7695	1.2986	0.2136	0.3467	4.5445	0.2258	1.4896	1.27	0.7938	0.1671	0.2245	0.5109	0.0917	0.4423	2.1216	0.6534	0.0418	0.7216	0.1969	1.0143	0.7208	0.7235	0.188	2.7565	0	0.3465	1.3595	0.3043	0.4655
AC000403.1	0.7968	0.5693	0.8527	0.5842	0.4823	0.6472	0.1393	1.0079	1.5396	0.2289	0.7452	0.1176	0.3799	0.4974	0.2486	1.0022	0.1401	0.7653	0.4019	1.2649	0.4811	0.2755	1.4323	0.1734	0.3915	1.1809	0.3064	0.5774	0.4671	0.114	0.4593	1.5488	1.5009	1.106	0.1658	0.6617	0.2946	0.8367	1.186	0.4151	1.2562	1.0281	0.3527	0.6798	0.2518	1.4179	0.4	1.7293	0.6542
EBLN3P	48.9253	28.0468	29.9263	25.0461	16.851	27.9433	16.6597	17.6075	20.0974	23.2549	40.0967	8.7576	27.8	16.1065	19.1924	28.8539	27.1711	10.0152	10.2608	21.8353	27.8621	26.4347	19.0374	21.2708	32.0387	19.2665	15.0252	12.708	24.5457	42.8107	6.7775	28.9866	23.7186	24.9201	40.6651	22.5729	11.6426	35.6006	17.9422	32.6289	28.025	27.2168	25.6191	18.5015	1.9048	34.7656	8.433	19.8298	11.452
AC116348.1	5.41	0.2188	0.9649	1.0388	0.3541	6.5352	2.0377	0.2566	0.2133	6.3042	0	1.5966	0.4486	0.1251	0.2597	0.878	0.1359	0.1299	4.5478	0.1789	2.2271	2.0044	0.1648	0.2141	0.443	0.61	0.6569	0	0.5045	0.6449	0.1155	0	1.6984	0.1138	5.4239	0.0917	0.1291	0.1114	0.076	11.69	0.6181	0.0931	0.0726	11.3222	0	0	5.4932	0.1566	0.1306
AC245060.2	5.0475	1.3964	4.7226	1.7129	0.1784	2.0437	0	0.7758	2.0421	2.5235	3.3217	0	0.113	1.2603	2.2243	0.9953	0.8218	1.1781	0.4583	0.9015	0.1496	3.3662	0.8305	1.7256	1.9345	0.4391	0	0.7183	1.5252	2.0793	0.5819	0	1.7114	5.3887	1.9593	1.2011	0.2601	1.7958	0.5359	5.4689	2.1175	2.5321	1.3892	0.5813	0	0.5389	0.4353	0.4732	1.2505
AL356481.3	1.472	0.4688	1.0126	1.0406	0.6502	0.8277	0.7351	0.0786	0.0979	1.3481	0.5632	1.0995	0.3089	0.8039	2.1463	0.4031	0.1248	0.3579	1.74	0.1643	1.3634	0.3681	0.1514	0.4914	0.4068	0.2401	0.3016	0.3273	0.7281	0.9474	0.6364	0.2414	0.2599	0.8359	1.5036	0.0842	0	0.9206	0.4186	0.7667	1.2486	0.4273	0.3998	0.7947	0	0	0.3967	0.4313	0.2399
LINC01144	5.1352	2.8152	4.5968	1.633	0.9839	2.5746	3.2582	1.4	1.1527	4.9064	2.4145	4.4778	2.1469	3.3598	3.0472	3.2195	1.8048	2.6072	1.8489	1.1049	2.5673	1.0728	1.8832	1.5533	5.4263	1.6415	0.7437	1.4857	0.7789	4.3407	2.6748	2.0294	0.7429	3.7593	3.2863	1.6987	0.3387	1.5133	0.4222	4.2219	2.2901	2.3852	0.4481	3.2956	0.377	1.5413	2.5919	1.3052	0.8672
AC010463.3	1.058	1.1553	0.7278	0.9973	0.3739	1.1899	1.4601	0.0903	0.2253	0.9119	0.6477	0.562	1.0658	1.849	0.9599	0	0.5742	0.9603	0.7204	0.3779	0.6271	0.5644	0.5222	0.7912	1.0916	0.4602	0.2312	0.1882	0.4567	2.0429	2.4394	1.1105	0	1.2016	2.4856	0.3873	0.2726	0.3529	0.8825	1.2124	1.4359	0.1966	0.2299	1.2946	0	0.3765	0.5214	0.1653	2.0003
AC012645.1	1.4106	1.0036	2.1614	0.6649	1.3029	1.5865	0.7452	1.1771	0.6144	1.4646	3.7289	2.8099	1.579	1.4408	1.7452	1.8263	0.957	1.0392	0.4123	1.4887	0.6176	1.5394	1.0549	0.8563	2.0793	0.5856	1.1912	1.0835	0.2537	4.5811	1.1458	1.0095	0.3623	2.4031	1.5064	0.5868	0.8054	1.2119	0.2431	2.672	0.8703	1.3998	0.9056	2.8154	6.0171	1.7115	0.79	0.7014	0.8988
AC135050.6	35.4054	30.4629	49.0035	30.6704	50.0121	44.2263	64.3458	24.735	30.6929	51.2667	75.3889	41.0712	38.7696	55.2059	58.1327	65.9229	23.7342	51.8958	40.8681	29.9913	57.447	86.0477	34.9974	77.5944	52.9115	24.0423	44.1213	34.601	47.7226	24.951	48.8854	33.6002	28.568	40.6087	48.0308	32.8515	8.2029	33.9187	24.9909	82.2275	51.1103	48.7511	31.4198	63.5123	9.2098	24.529	35.6494	36.3003	30.4273
AC080038.1	0.6417	0.2002	0.7568	5.9197	0.1215	1.0311	0.9989	0.3523	0.488	1.9361	0.0351	0.3652	0.1539	0.1144	0.7724	0.452	0.1244	0.2972	2.4623	0.0819	0.4076	0.4891	0.9804	0.9794	0.2703	0.5184	0.3507	0.1631	0.4947	15.3426	0.687	0.9623	0.3238	1.9783	0.2341	0.4615	0.0591	0.3058	0.3128	0.7641	1.9796	0.4684	0.1328	0.9239	0	0.4894	0.3954	0.1433	0.269
AL645933.2	19.7218	10.4016	26.5927	1.1567	0.7357	17.005	3.852	2.395	1.2132	15.602	10.1951	8.5555	15.9926	5.9636	18.234	5.7135	5.8274	10.3992	17.7724	6.0268	5.5856	14.0292	3.2448	7.0233	9.2058	6.5954	4.3584	10.8361	10.0267	12.4685	7.4779	5.1751	2.1051	8.2627	9.8937	5.7357	0.6775	14.7642	3.988	6.9858	17.142	11.4405	5.2056	12.398	1.9228	10.8404	6.696	6.0266	7.8575
AC023908.3	0.868	0.316	1.1943	1.0146	0.2608	0.4296	0.7819	0.1482	0.2218	1.0924	1.1026	0.415	0.3498	1.2354	0.9676	0.1712	0.0707	0.3827	0.7487	0.248	0.6689	0.2547	0.2571	1.2056	1.4459	0.151	0.3415	0.247	1.0741	1.0281	1.5412	0.1367	0.1717	1.0056	1.596	0.2383	0.0335	0.2895	0.1053	1.4288	1.3067	0.4838	0.264	0.9747	0	0.1854	0.2995	0.2442	1.0753
AC002451.1	1.1298	0.5769	2.4074	0.355	0.6655	0.7765	0.929	0.4355	0.2506	0.6763	0.5524	0.6148	1.4579	0.715	0.4169	0.6876	0.3513	0.3866	0.2909	1.6955	1.2674	1.0674	0.6455	0.4359	1.4688	0.157	0.2144	0.3768	0.2766	0.0202	0.7779	0.2882	0.5321	0.6505	1.3945	0.2657	0.2426	0.663	0.3808	0.7193	0.455	0.8163	0.1534	0.5761	0.9371	0.4049	0.6622	0.3065	0.2251
GABPB1-AS1	8.8436	1.576	5.1349	1.5239	1.2433	1.8285	1.9034	0.7073	1.1933	5.7279	3.1598	1.6643	3.1882	2.5409	3.2327	1.12	0.9776	0.7346	4.0186	1.3803	2.5326	8.2429	0.9221	4.2667	3.4337	0.8464	0.9759	0.3779	4.2955	11.7651	2.6057	1.7817	3.1234	6.7181	4.4979	1.054	0.1944	1.9411	1.1488	4.5553	6.4817	2.174	0.5732	11.2465	0.4954	1.1452	1.5537	1.2895	2.7262
AC131009.3	4.7922	3.4889	6.0864	7.1234	4.2339	3.1094	2.8116	2.6755	4.7097	5.4018	3.1029	6.1192	3.7136	2.9912	3.8223	1.6154	1.0003	1.4339	2.51	0.6583	2.4583	3.6876	1.213	3.3475	6.9281	1.2826	6.0427	3.6064	6.0998	7.5927	0.6375	1.6928	1.8227	8.792	4.5186	2.0242	0.8311	1.4345	2.376	2.6883	6.8226	2.2259	1.4684	8.0931	29.651	0.656	1.4761	3.1681	2.7638
AC007773.1	0.5442	0.7924	0.7488	0.7182	0.577	1.0405	0.5534	0.2323	0.7532	1.6419	0.6663	1.0841	0.4264	0.7473	0.7759	0.1192	0.0738	0.7057	0.3706	1.1663	0.9678	0.3629	0.4477	0.8721	0.6819	0.3314	1.1895	1.5489	0.6656	6.0251	1.5058	0.9996	0.3844	0.8035	0.7227	0.2988	0.2454	1.0286	0.9492	0.4536	1.9473	1.7189	0.2759	0.2742	3.1836	0	0.3353	1.2756	0.4967
AL035252.3	0.418	0.7608	0.9673	0.5552	0.554	1.154	1.0627	0.7625	0.3439	1.3922	3.097	0.2776	0.7231	0.7116	1.0343	0.5412	0.5414	0.1971	0.6613	0.6108	0.5913	1.1404	0.4689	1.2992	1.3584	0.3636	0.2699	0.3042	0.7108	0.905	1.0296	0.4487	0.2147	0.7769	1.6692	0.313	1.3218	0.3591	0.5043	2.4744	0.9612	0.5648	0.3991	1.6413	0.2779	0.1691	0.3746	0.6829	0.6194
AC026979.4	2.5371	1.125	2.3008	0.4674	1.0902	2.3735	1.4911	1.0438	0.7244	1.7297	1.0148	1.1486	1.123	1.742	1.136	0.8591	0.7198	0.5084	0.4537	1.1534	0.8887	1.9381	1.2523	1.2074	2.2524	0.6922	1.1469	1.3949	0.9292	0.5938	0.5185	0.5296	1.0916	0.6811	1.2016	1.4565	0.0966	1.8976	1.2068	1.0332	1.8213	1.1356	0.8352	1.0874	0.0562	0.472	0.817	0.919	0.6015
AL139099.2	1.8468	0.9604	1.6335	0.6217	0.3496	0.2967	0.6708	0.1126	0.2809	0.2274	0.8076	0	0.5906	0.6587	1.3678	0.1445	0	0.171	0.6986	0.2356	0.5865	1.4076	0.217	1.1275	1.0695	0	0	0.2347	0.8542	1.0189	0.1521	0	0.5591	0.5993	1.8865	0.2415	0	0.1467	0.1	0.962	1.1394	0.1225	0.0955	1.7092	0	0.939	0.2438	0.4123	0.516
AC107959.3	5.524	4.4151	4.2133	0.2264	2.5463	4.2543	2.1371	3.5889	8.2466	5.7449	0.6432	7.1764	3.3605	7.7206	1.5565	1.7102	1.8737	1.0121	0.3634	2.8953	0.2669	1.9221	8.4958	2.4376	18.1882	0.3656	3.4777	5.0198	0.3888	0.3092	0.2769	0.2363	3.2234	6.342	8.0347	2.9125	0.2321	3.6716	0.7285	10.1963	2.8152	7.6975	0.087	5.1	0	1.6027	0.9987	7.6936	1.879
PRKCZ-AS1	2.9896	2.1543	5.1208	2.6169	1.2129	4.5632	4.9859	0.9117	0.5846	5.3644	2.2644	1.8231	1.9123	2.2089	1.5816	1.8047	0.9934	1.1471	2.7465	2.2883	2.5317	5.2082	1.9073	2.1185	2.9679	2.1495	0.3667	1.3024	2.4142	2.16	2.4971	2.4816	1.8532	3.6726	3.9264	1.8985	0.4127	1.0854	1.388	1.462	2.1832	1.8137	0.4419	2.9206	1.2641	2.0086	1.5599	1.2394	1.1138
AC009974.1	3.7203	1.9467	2.7194	0.9863	0.5136	3.5304	5.9959	1.2905	0.2476	5.0107	0.2669	4.0142	1.1712	0.5805	1.3562	0.2547	2.2084	0.7537	2.8147	1.2458	1.5506	0.3101	0.1913	0.4968	2.4849	1.0113	1.5246	1.4476	0.7528	0.2993	1.6084	0.3051	0.8212	0.5282	4.394	0.6384	0.2247	2.973	0.3526	0.3634	0.7172	1.728	0.2526	2.5106	0	1.6551	3.2947	0.545	0.4548
COL4A2-AS1	1.7633	2.4961	4.8522	0.6464	0.6058	2.9746	2.0635	0.3346	0.2086	3.1243	2.6986	0	0.7676	1.1006	3.3011	0.8585	0.2658	0.254	2.0011	0.6998	1.4517	3.5278	0.6447	1.8838	1.6606	1.4486	0.1071	0.1742	0.9162	0.6305	0.3388	1.1567	0.1384	2.2251	3.102	1.7931	0.1262	0.5446	0.9657	1.1226	1.6922	1.001	0.7095	3.5257	0	0.3486	1.0863	0.3061	0.8303
AC008764.8	1.9469	0.9497	2.8663	2.6428	0.5504	0.7445	1.7961	0.4156	0.5182	2.2656	0.9237	0.9308	1.0461	2.5034	3.0786	0.3413	0.4227	0.5554	1.3993	0.2782	1.1541	1.0387	0.2242	2.5168	2.5255	0.4742	0.2979	0.1039	1.947	1.3785	2.1997	0.2299	0.7151	1.5478	3.5201	0.4633	0.0627	0.5195	0.3396	1.5821	3.243	0.8139	0.3384	1.8499	0	0.1732	0.7556	0.2434	1.4089
OSGEPL1-AS1	1.5992	0.5374	1.5234	0.8697	0.2717	0.6226	1.4744	0.5252	0.4584	0.6893	0.4707	0.8985	0.3443	0.8447	1.2756	0.5391	0.4173	0.638	1.4892	0.3296	0.4558	0.4102	0.8096	1.6428	1.5414	0.428	0.2689	0.7659	0.8408	0.7126	0.7091	0.4842	0.3476	0.4192	1.2566	0.2252	0.1981	0.8206	0.3731	1.538	0.9107	0.4571	0.3564	1.1069	4.7976	0.8756	0.4168	1.1534	0.3609
EMX2OS	56.2318	26.5107	83.0829	0.4753	35.526	65.3436	32.0736	22.3005	10.7929	25.8919	7.7934	31.7765	28.9951	15.2616	14.5996	48.6649	15.3476	20.3584	4.6806	37.7022	30.8721	38.5293	5.4261	34.2074	53.4011	5.6655	16.2575	29.216	9.3073	5.5819	4.9237	33.1688	2.1369	2.1221	49.5873	23.8698	1.9448	47.127	9.6931	104.732	22.6883	51.6428	26.5666	29.0937	14.5448	10.798	12.5634	15.1083	8.4768
AC073655.2	2.0856	1.1388	1.0435	0.6255	0.9213	0.4265	1.8937	0.5262	0.3533	1.144	0.1814	1.0071	0.7959	1.4793	0.6758	0.6751	0.0643	0.799	1.3627	0.5926	1.4049	1.3909	0.156	0.8102	1.083	0.4948	0.3626	0.1686	1.1594	1.7696	0.7104	0.3731	0.4018	1.4535	1.6946	0.7375	0.1221	0.7378	0.3954	0.5432	0.5264	0.6165	0.206	1.1259	0	0.3374	0.7008	0.6666	0.649
POLR2J4	5.2824	3.3312	9.8785	4.5937	4.8971	5.9828	6.9715	3.4623	3.2477	5.1946	13.4929	8.8922	6.2876	3.3901	2.8447	4.8089	12.4668	2.0259	4.5875	1.1959	3.3629	2.9274	11.1392	13.0355	6.1415	4.5303	6.911	4.3673	4.3089	7.1833	3.3452	6.9794	2.47	4.3094	7.8278	5.7537	0.6949	5.5422	5.0776	16.471	5.5997	3.7668	2.3709	6.8014	2.9922	4.6338	5.4544	5.7548	3.4681
AC008750.4	2.2367	0.5699	1.6926	2.4247	0.5928	1.2578	1.2998	0.6685	0.3572	1.2532	0.3423	0.297	0.3756	0.9773	0	0.245	0.1517	0.145	0.6769	0.1997	0.6629	0.7458	0.184	0.4779	2.0606	0.1946	0.2444	0	0.8851	0.5759	0.3868	0.1467	0.474	0.7621	3.4271	0.8188	0	0.1243	0.3392	0.466	1.5179	0.1039	0.324	1.61	0	0	1.0335	0	0.5833
AP002807.1	3.4128	1.752	2.9499	7.3827	0.5798	0.935	3.6549	0.3736	0.3261	3.6206	5.5579	1.0459	1.5672	1.2563	1.8147	0.4314	0.1187	0.5673	5.1309	0.3907	1.6859	0.8754	0.4319	2.1502	2.9668	0.8373	0.0478	0.1557	2.0146	10.0259	4.0354	0.4018	0.4945	5.168	2.7263	0.921	0.1127	0.681	0.2654	2.5527	4.9127	0.1626	0.4753	2.6456	0	0.2336	1.1052	0.7521	1.9112
LINC00924	2.3407	4.2697	0.7786	3.2127	0.25	9.8504	1.3266	3.9974	2.4511	3.0043	0.0984	1.076	1.382	2.5689	2.9839	2.1416	1.1692	0.9172	8.3584	9.693	5.8704	3.7739	10.3686	0.7145	1.1564	12.0715	0.3092	1.0524	0.731	0.149	7.3841	12.6219	23.6932	14.8845	2.9691	2.8485	4.1008	3.7178	6.2905	1.5543	7.1252	1.2545	1.2575	11.7203	7.3042	11.6263	1.7352	7.8781	2.1382
LINC01772	2.9017	1.4954	2.3102	1.8901	0.5041	2.0717	2.2617	0.4037	0.3471	2.74	0.7859	0.8226	1.0583	1.0175	2.4087	0.8036	0.3981	0.7609	1.0977	0.7278	1.2321	1.1741	0.6437	2.0899	3.3521	1.0635	0.4276	0.406	1.6419	1.1752	2.2552	0.9197	0.737	1.0368	2.7475	1.9395	0.4935	0.9606	0.8035	0.5265	2.1723	1.5598	0.2834	1.9479	0.5563	0.7252	0.9541	1.2736	0.8715
BX470102.1	2.7894	2.8285	0.9595	1.5025	3.4326	0.5602	1.2302	0.1701	2.1213	3.7783	0.6861	4.8949	1.8957	0.3731	8.1345	0.4365	0	0.5167	5.2758	1.7791	2.5098	7.7066	0	3.9379	1.1013	0.9532	1.3064	1.0632	0.5017	6.9252	5.9722	2.4834	1.5481	0.792	0.5088	0.3647	1.9892	1.9937	1.6619	2.0757	1.475	0.2776	0.1443	2.1513	1.4569	0	0.982	0.1557	1.9484
AC018809.2	3.7359	1.9644	2.494	1.8	1.0636	2.4899	1.6986	1.9731	1.6794	1.7175	2.4353	1.5619	2.0754	2.0728	1.7755	2.2131	1.7647	1.1124	1.005	1.804	1.702	1.1258	1.844	1.7296	3.1206	2.1906	0.7258	0.9845	1.324	2.5116	1.6112	2.5234	1.3684	1.9958	2.6572	2.5327	0.6774	2.723	1.2381	4.9445	2.3048	2.0052	1.2427	2.6394	4.7892	1.0834	1.6452	1.4919	1.2539
AC112484.3	1.0436	0.3324	2.5129	1.5371	0.5186	0.3668	2.0847	0.0557	0.1389	1.6867	0.0998	1.1261	0.219	0.8957	0.8454	0.1429	0.885	0.4229	2.27	0.3495	3.4799	0.348	0.1073	0.4878	2.7882	0.0567	0.5702	0	0.2816	1.2595	2.4815	0	0.4607	0.0741	0.7329	0.1791	0.042	0.5076	0.1978	0.7475	0.8853	0.6059	0.1417	1.4555	0	0.4643	0.7233	0.3058	0.5103
AC092306.1	1.0238	0	0	0.1609	0.603	0	0.2479	0	0.1817	0.2942	2.0892	1.133	0.191	0	1.327	0	0	0.885	1.5492	0.6095	0.5058	0.6828	1.4038	1.2761	0.6288	0.2969	0	0.3035	0.8594	0	0.7869	1.3433	0	0.3876	1.2201	0	0.2198	0	0.2588	0.1778	0.8422	0	0.2472	0.6141	24.9555	0	0	0	0.1112
AL592424.1	1.5842	1.1032	1.0899	0.5519	0.8215	0.6585	0.7755	0.4705	0.77	1.3359	0.1845	1.2348	0.1927	0.6879	1.7408	0.4527	0.2804	0.2233	0.9119	0.492	0.5614	0.8728	0.9633	3.5321	1.0661	0.6291	1.5431	0.5513	0.3469	0.8424	0.0794	0.6326	0.3892	0.5476	0.8795	0.5043	0.1331	1.2253	0.6268	0.3947	1.4873	1.0238	0.0748	1.1899	0	1.287	0.6577	0.861	0.3592
AL021368.3	0.9152	0.1333	0.3778	0.0863	0.0809	1.3381	1.8614	0.1563	0	2.7611	1.1905	2.1877	0.7171	0.1143	1.0676	0.2005	0.4967	0.2373	1.1771	0.9807	1.4919	0.1221	0.3012	0	0.0675	0.0796	0.4001	0.1628	0.3951	0	1.0551	0.2402	0.1293	0.1039	1.4958	0.2513	0	0.3053	0.1388	0.8581	0.9034	1.5303	0.3977	0.5929	0	0.1629	0.6766	0	0.179
AC104667.2	0.4472	0.2791	1.0109	0.0602	0.7056	0.3593	3.3181	1.5274	0.8162	0.7985	1.3933	1.7392	0.8224	1.4356	0.2898	0.8749	0.26	3.2721	0.5317	0.2282	0.6154	6.0926	1.2088	0.7508	0.8005	0.8892	1.1171	0.6818	0.6435	1.0692	0.6629	3.2271	0.2708	0.1088	1.5989	1.1402	0.0823	0.5682	2.3012	1.5308	1.3401	0.4451	0.3008	0.8048	15.0271	0.2842	0.492	2.1963	0.1041
AL513477.2	3.3527	3.0511	2.8191	1.4046	0.9051	3.5612	8.7943	0.8747	0.4958	5.4588	1.1402	4.8234	0.6255	2.9066	5.3111	0.9182	1.39	1.2076	4.8617	0.6653	3.5884	1.118	0.1532	1.5919	3.432	0.7291	2.748	1.6566	3.2831	3.5967	4.1874	1.8328	0.1316	2.1154	3.9955	1.7899	0.4799	1.139	1.1299	0.7762	2.528	2.2494	1.2141	2.7485	0	0.9943	3.4425	0.5821	1.5786
AC103809.1	0.8126	0.7099	4.8075	0	0.2154	1.3708	0.4722	0.5551	0	0.1401	0	0.1079	0.2729	0	0.316	0.178	0.2205	0.2107	0.1844	1.4512	0.9634	0.4335	0.1337	0.3472	0.2994	0.3534	0.0888	0.1445	0.2338	0	0.0937	0.3198	0.1148	0.1846	0.415	1.1155	0.0523	0.4517	0	0.0847	0.6016	0.5284	0.1177	2.2226	0	0	0.6007	0.2539	0.4768
AL033384.2	1.6241	1.0979	1.9153	0.4374	0.41	0.2609	2.0223	0.2972	0	1.3999	0.6214	0.7703	0.3896	0.8689	1.2028	0.3813	0.1574	0.7521	1.141	1.0359	2.7506	0.4642	1.1452	2.3547	1.1115	0.3027	0.7606	1.0317	2.0865	1.4934	1.2037	0.9132	0.4917	0.1318	0.3555	1.0617	0.8967	0	0.7917	0.846	1.2882	0.3233	0.5041	1.169	1.9793	1.6514	0.9291	0.5438	0.9076
AC015849.3	9.539	7.4182	9.5453	8.8897	2.3942	5.9737	7.7164	1.2033	1.1541	5.139	2.9861	1.0077	3.5187	2.8418	4.2149	2.85	1.0295	0.8433	4.4286	2.5167	4.0161	8.2411	1.6051	3.8216	6.711	4.3375	0.9477	0.9641	6.6288	7.3958	3.8741	2.7022	3.8285	6.5249	9.6332	5.1587	2.2343	1.2052	2.8769	5.4206	7.0887	4.3301	3.2973	7.1785	0.7926	0.7716	2.2705	1.0163	5.0176
MZF1-AS1	1.6264	0.9834	2.7498	2.4685	0.7306	1.1316	1.732	0.5414	0.7484	1.3187	2.4469	1.2812	0.5554	1.5658	1.8221	0.755	0.5236	0.965	1.147	0.4431	0.9192	1.5074	0.8164	1.7081	1.5847	0.8153	0.738	0.9807	1.3386	4.6132	1.9386	0.9765	1.0515	1.4245	1.4783	0.8704	0.1332	0.5823	0.3135	2.9149	1.5646	0.7682	0.6588	2.52	3.6954	0.4905	0.934	0.883	1.0603
AC104695.3	13.9394	2.472	1.9671	9.0968	0.4737	0.804	2.9857	0.3052	2.2832	27.1119	1.641	10.205	0.2	8.2547	63.003	3.1325	0.7274	1.1586	39.7507	3.83	3.443	3.8138	0.8821	19.0925	16.9911	0.9327	1.953	0.3179	2.4429	9.6625	8.4473	0	9.3414	21.5146	20.4456	23.3886	8.6335	3.9739	1.0841	1.8618	9.7022	4.4825	3.1064	1.0291	3.0492	10.1764	1.9818	4.4681	2.4467
AL132780.2	3.9077	3.7669	2.9372	0.5116	1.0549	3.1334	4.1526	1.2976	1.1557	4.0857	0.3046	3.9881	1.8225	1.2647	4.2675	2.6161	0.3927	1.0321	0.876	2.3909	2.0376	3.4264	0.7739	2.5512	3.2534	1.3534	1.4235	1.2228	0.6508	11.1322	0.4171	1.8039	0.869	3.0409	3.9916	1.0265	0.2331	1.3275	0.3567	2.4879	0.4911	0.7731	0.1834	6.7716	5.4679	1.0302	2.6526	0.6219	0.5661
AC012676.3	1.3252	0.9648	1.2156	0.7287	0.1951	0.2484	1.0428	0.2829	0.3527	0.2856	1.5211	0.8799	0.3708	0.6893	1.1451	0.8469	0	0.1432	0.8355	0	1.1456	0.4419	0	0.3539	1.0581	0.0961	0.3621	0	0.4767	0.7108	1.2732	1.0143	0.312	1.6305	1.2409	0.6064	0.0711	0.3683	0.5025	1.8408	0.8176	0.7181	0.4799	1.1129	0	0	0.2721	0.1726	0.936
AC067838.1	4.0338	4.5386	7.5684	1.9877	1.62	4.6398	6.1266	1.7222	1.9522	7.5073	2.0345	8.5224	3.0786	6.7525	4.3965	3.6156	4.9756	2.0208	3.3987	1.801	2.3097	5.5026	3.3184	3.428	5.4731	3.19	5.9111	4.5661	2.4404	2.1244	5.2847	9.3821	1.2952	2.4989	1.6857	4.363	1.8897	4.383	2.5027	4.5845	4.9772	2.8105	1.328	6.1372	5.81	4.4048	6.2693	5.4438	2.6299
NDUFV2-AS1	3.694	2.6625	3.9644	1.4625	2.5457	2.3681	3.6224	1.2932	0.7079	4.0439	4.2401	2.3056	2.8531	2.0291	3.2557	2.8733	1.1026	1.9159	2.9625	1.5833	2.7372	4.188	1.641	3.2756	4.1111	2.2172	2.4625	0.9856	2.1793	5.2785	3.3644	3.3926	2.0875	2.4753	3.9243	2.3327	0.7852	1.5196	1.2885	2.4245	4.877	2.1962	1.0969	3.8822	0	0.986	1.7068	1.4431	2.2879
AL731563.3	1.866	1.1662	1.8166	1.0786	0.7621	0.8513	1.6495	0.3157	0.3748	2.1699	0.4176	1.052	0.7882	1.3845	1.1408	0.5978	0.2388	0.3196	0.879	0.5345	1.4087	1.667	0.2317	0.6582	1.5958	0.5819	0.5964	0.3131	1.4184	0.4306	1.0553	0.3464	0.5471	1.0396	1.2947	0.4672	0.3628	0.5284	0.3204	1.082	1.6725	0.8831	0.2677	1.4192	0.5578	0.5012	0.7049	0.5226	0.6886
AC005479.1	0.8981	0.7846	0.865	0.5926	1.3489	1.0101	0	0.4601	0.765	0.7741	0.5498	0.4771	0.1005	0.5606	0.4656	0.6887	0.3656	0.4658	0.2718	0.3208	0.6655	2.0364	0	0.0959	1.4562	0.4687	0.0981	0.7988	0.6461	1.2718	0	0	3.0451	2.448	1.1926	0.7398	1.5619	0.699	0.4767	1.3099	0.4433	1.4183	0.6505	0.9697	0.6567	0	0.2766	0.421	1.1125
AL354733.3	0.8138	1.58	2.2395	2.8128	1.0785	1.3729	1.9705	0.1158	0.2888	1.0522	1.2455	0	0.6073	1.5239	1.0548	0.4458	0.184	0.3517	1.2314	1.2112	1.6081	0.9046	0.2232	0.8694	1.9994	0.236	0	0	0.8782	1.5715	0	0	0.7665	1.5405	3.6023	0.4965	0.7863	0.4524	0.1029	0.5652	1.3389	0.126	0.5894	1.5621	0	0.2414	0.4178	0.4239	0.1769
TRAF3IP2-AS1	4.2591	3.2686	3.655	1.8004	1.2511	2.679	1.6346	2.4088	1.2973	3.2928	2.3267	1.4432	2.2117	1.0689	3.2296	3.0304	1.0277	1.3094	1.4617	3.2347	4.0344	2.1669	2.3478	2.0523	2.4837	1.5087	1.3436	1.0349	1.4768	2.1338	0.9998	3.2837	2.0315	2.3438	2.1529	1.5069	1.1172	2.1846	1.0322	2.8476	2.8578	1.7437	1.6457	2.4416	1.4716	2.4808	1.0211	1.4408	1.5959
MIR100HG	0.4948	0.9652	1.4201	0.7275	0.9755	0.6998	0.3809	1.8636	1.4665	1.5391	0.8266	0.7503	0.9652	3.5014	1.3019	0.3661	0.0977	0.4238	1.7755	1.3685	0.8236	1.4456	1.6344	0.3926	0.7471	1.8599	0.4419	0.4237	0.1846	18.8754	0.6407	1.3784	2.0894	1.3715	0.2942	0.3768	1.4272	1.088	0.4256	0.5328	0.9067	0.4871	0.0736	1.345	0.387	2.438	0.273	1.183	0.6151
AL096865.1	0.5706	1.1632	0.6281	5.3791	0.3529	0.1284	0.6632	1.2181	0.6076	5.8534	1.179	2.7281	0.2555	1.211	1.3313	0.9377	0.7742	0.7399	2.7631	0.3057	0.5074	0.3044	0.2817	0.9754	0.7991	0.4467	0.3742	0.203	0.6158	6.9787	5.2631	0.8984	0.4837	4.9255	0.8161	0.0522	1.0659	0.571	0	0.2378	1.4786	0.4241	0.124	1.5609	0.8345	1.5232	0.3516	0.8025	1.4509
AP002360.1	6.5121	6.7468	10.5453	3.5887	8.1876	6.1408	7.5685	5.4322	3.2	12.6083	35.2272	12.6394	8.9154	6.5037	6.1031	7.8475	3.8741	9.0284	6.5944	10.1988	9.428	8.7526	6.2637	7.4924	8.5285	5.3597	11.8245	6.5938	4.2886	80.8012	12.0701	6.9667	3.5384	6.0306	7.4707	5.639	1.6133	5.0682	3.4947	18.5265	9.2712	8.609	6.4579	8.5818	53.2353	5.7941	5.987	11.4283	5.8785
AC120053.1	10.0622	7.3779	15.4269	7.317	5.207	9.3766	14.8269	2.7003	3.2139	22.1171	5.4998	16.3213	5.6316	11.7539	6.8935	5.4329	5.1684	4.9392	8.2108	6.9314	6.7103	11.3119	6.3856	10.5196	14.3554	7.7525	11.9388	7.2872	7.2909	6.5692	10.2748	7.1667	5.1784	8.3261	13.5087	5.7885	3.4259	7.9909	4.5781	5.6158	8.7794	8.2792	6.6109	11.537	4.2045	4.988	9.9626	4.3801	4.4515
AC007731.1	1.988	1.5604	2.0942	1.9032	0.8507	1.7816	0.8123	0.2652	0.6614	2.3294	2.6621	0.0412	0.8692	2.7532	1.9727	0.5104	0.3793	0.7652	0.6345	0.7766	0.6905	2.8587	0.3066	1.261	2.0375	0.6215	0.0679	0.2763	2.4582	8.0773	0.7878	0.163	0.6582	1.7286	2.3797	1.1655	0.06	0.967	0.5653	1.974	3.411	0.8945	1.0348	2.2135	0	0.5527	0.2296	0.8251	1.4783
STARD4-AS1	10.1422	6.0202	7.4803	5.76	1.0999	5.3051	2.3105	1.1849	1.4653	2.1462	0.6336	0.2123	1.8793	2.9657	2.4204	2.4837	0.5501	0.696	1.2054	1.9378	2.7251	4.037	1.9637	2.9407	3.405	1.6443	0.2184	1.1174	2.687	6.0944	1.4484	1.4086	2.38	5.9151	5.1217	1.9338	0.8056	2.5778	2.5463	2.8974	2.2477	3.061	0.6411	4.0655	0.0139	1.1686	1.0132	1.3029	1.668
AL357507.1	0	0	0	0.1491	0	0	0	0.0675	0	0.2726	0.0605	0	0.2655	0.4936	0	0	0	0.1025	0.0598	0.4236	0.2344	0.3164	0.1301	0	0	0.1376	0	0.1406	0.0569	0.1018	0	0.1037	0.1117	0.2694	0	0	0.1019	0	0.06	0	0.0976	0	0.0573	0	0	0.5628	0.0974	0.3707	0.0516
AC011444.3	1.3021	0.3555	1.7916	0	0.2876	0.3661	2.1281	0.4169	0.1733	1.5433	0.3736	0.8646	0.3644	1.6255	2.9534	0.1783	0.6625	0.211	0.1231	0.5814	0.4824	0.6513	0	0.3478	0.5998	0.5663	0.1779	0.8686	0.1171	1.2572	0	0.4271	0	0.3697	0.665	0.149	0.3145	0.3619	0.1234	0	0	0.1512	0.3536	0.3515	0	0.2896	1.0027	1.0174	0.1061
AC004832.6	0.9017	0.3829	0.2068	1.4166	0.2655	0.507	2.6744	0.2566	0.64	0.7772	0	1.4968	0.3364	1.9699	1.3635	0.1646	0.1019	0.0974	0.8527	0.671	1.0022	0.7015	0.1236	0.883	1.0522	0.0654	0.4927	0.2673	0.5406	0.5804	0.6064	0.1972	0.1062	1.1094	0.614	0.2751	0.0968	0.2506	0.1709	0.3131	0.2781	0.349	0.0544	2.2716	0.9157	0.1337	0.1852	0.4697	0.3429
AC006449.6	3.0873	2.3147	3.6772	2.3672	1.6895	2.5134	2.2425	2.0853	1.8397	3.0584	7.5457	3.9775	2.8368	2.7611	3.4938	3.054	1.9381	3.6446	2.6146	2.2631	2.3559	2.3355	1.4404	3.0029	3.515	1.8839	3.0717	1.8442	1.4089	4.8641	5.1264	3.3553	1.6925	2.4335	1.9298	2.214	1.0091	1.5882	1.2579	7.6568	3.6671	2.4613	1.1347	2.952	4.6049	2.5419	2.4555	3.2401	2.5385
SLC12A9-AS1	2.2937	2.1917	1.9724	3.3783	1.1399	1.7735	2.1868	2.9378	3.0526	5.1899	0	6.2824	4.814	3.0424	4.2735	3.7692	4.8626	0.5576	1.193	0	1.912	0.956	2.3586	0.4595	4.8602	1.1223	1.0966	0.51	0.4125	2.3991	0.9916	7.7115	2.4303	0.9769	4.1002	1.1808	1.0157	1.5939	1.5219	0.5974	1.2382	0.3995	0.2077	1.651	12.2298	1.7857	1.5897	0.896	0.2804
HOXB-AS4	0.7907	1.0362	0	11.8511	0.1397	0	0.1149	0.135	3.1149	0.2045	5.264	0	0	0.0987	1.1273	0.693	0.3218	1.0253	1.5554	2.2594	0	0	0	3.379	0.2914	0	2.1603	0.1406	0	6.8199	3.5552	9.5443	0.2234	53.9719	0	0.2895	2.5975	0	1.0193	0	0.7805	0.4407	1.9471	0.0569	6.7456	1.1256	1.9485	1.2356	10.8256
AC139887.1	4.0691	1.6159	3.3083	1.5692	0.8171	0.8321	4.4336	0.7897	1.1815	1.5943	2.4061	0.4912	1.6563	0.6927	1.1986	0.4053	0.251	0	0.9795	0.3303	1.9187	2.467	0.3043	2.5688	1.4995	1.6089	0.4043	1.316	1.8629	1.1905	0.2132	0	1.0452	1.8906	4.1565	1.862	0.1191	0.8226	0.1403	1.7342	2.5104	0.3436	0.6698	1.8639	0	0	1.7092	0.8671	1.0853
SCGB1B2P	2.2327	3.376	3.6628	1.7809	1.5933	2.5111	4.6783	1.3199	3.3829	7.9943	2.1685	5.1318	2.0186	3.9665	9.1268	1.8815	0.8156	1.8929	5.8472	2.4538	2.6725	5.7269	1.2716	2.1101	4.1139	1.1205	1.8769	1.5275	1.2356	2.3215	6.1382	2.8167	1.9411	2.0481	2.193	2.2006	0.7744	1.3367	0.5209	1.7893	2.9668	2.6326	0.4976	7.2322	2.9304	1.0697	1.6929	0.5368	1.2877
AL121820.1	0.918	0.6683	0.9473	1.7306	0.4055	0.6453	0.1667	0.4899	0.4887	0.5935	0.1756	0.1524	0.1284	0.573	0.4462	1.1314	0	0.4464	0.6077	0.8197	0.3401	0.4591	0.3776	0	0.8457	0.8983	0.1254	0.2041	0	2.8066	0	1.2044	1.1348	1.0426	0.8205	0.5251	0.1478	0.5103	0.4351	2.5104	1.2742	0.6396	0.3324	0.6608	0	1.021	0.2121	0.3586	0.2992
AC004967.2	1.5509	1.3308	1.1051	1.5403	0.416	0.4984	0.7041	0.0709	0.2359	0.9549	0.2543	0.2207	0.837	0.5878	0.8615	0.4248	0.3382	0.3232	0.9639	0.5441	0.985	0.591	0.4101	0.2663	1.633	0.4096	0.0605	0.0493	1.076	0.8913	0.7982	0.2544	0.7434	1.7615	2.0935	0.7097	0.3568	0.3079	0.315	0.8079	1.196	0.7204	0.5416	1.1164	0	0.1479	0.3583	0.5193	0.6861
AC138207.4	7.1975	6.0747	4.3819	6.6045	1.4631	3.9399	5.3207	1.5772	1.5597	6.561	1.974	3.2143	3.6361	4.3336	3.8801	2.3027	1.2531	2.3951	3.7106	1.9907	2.9262	3.0159	1.4671	2.3477	6.5722	3.6845	1.7402	1.5862	5.4302	7.0926	5.6543	2.2146	2.6995	5.9681	7.1244	3.964	1.4975	2.4432	1.6905	7.0007	7.5054	2.8994	1.3839	7.7713	0.0776	2.3802	2.3544	4.1305	4.8585
LINC00677	1.2681	0.2638	0.7478	1.7931	0.08	0.6112	0.5264	0.1547	0.1929	0.4685	0	0	0.3042	0.5654	0.2348	0.1985	0.2458	0.4698	0.5482	0.1618	0.1342	0.7249	0.149	0	1.1349	0.1576	0.099	0	0.5865	0.3498	0.4177	0	0	1.1316	0.6477	0.3316	0	0.1007	0.0687	0.3775	1.6764	0.0841	0	0.8476	0	0	0.1116	0	0.2362
AC036108.3	2.2132	0.9063	1.6313	0.6892	0.5412	1.0001	0.9186	0.3712	0.1052	1.1071	0.4083	0.3149	0.3318	0.8881	0.9732	0.5628	0.1609	0.4612	0.6129	0.9528	0.3514	1.8449	0.3901	0.7389	1.6166	0.6188	0.5399	0.4921	0.9241	1.4754	0.2962	0.4926	0.335	0.763	0.4239	0.7596	0.2546	0.6152	0.5544	0.3911	1.6823	1.1748	0.6011	0.7965	0.0482	0.5626	0.6452	0.4632	0.7214
AC007342.5	0	0.0719	0.068	0.0466	0.0873	0.0278	0.0897	0.0633	0.1578	0.0213	2.5323	0	0.1106	0.0617	0.2561	0.0812	0.134	0.1281	0.2242	0.1323	0.2562	0.1318	0.1625	0.1583	0.1274	0.4941	0.054	0.0439	0.0355	0	0.0285	0.6156	0.5582	0.1122	0.1009	0.113	0	0.0275	0.5244	0.0515	0.5485	0.0688	0.1431	0.0711	0	0	0.0609	0.193	0.0483
AC009093.6	0.7653	0.3482	0.2632	0.9919	0.3381	0.6455	0.6254	0.0817	0.2037	0.1649	1.098	0.8892	0.8566	0.4777	1.9837	0	0.2596	0.124	3.6909	0.6833	0.7088	0.6379	0	0.2044	1.0575	0.4993	0.1045	0.1702	0.8258	1.6008	2.8673	0.251	0.1351	0.4346	0.9771	0.3502	0.4313	0.1064	0.4352	2.1924	1.7704	0.2666	1.1085	0.6197	1.1658	0.6809	0.3536	0	0.7484
AP000692.1	5.5028	1.8093	3.2972	2.7609	0.941	1.6969	1.9341	0.3031	0.567	1.6831	1.1546	0	1.1922	1.7728	3.106	0.5834	0.843	0.6905	1.5444	1.1096	0.5261	4.4985	0.146	2.2757	1.7008	0.3088	0.388	0.4736	1.3409	1.9424	2.0465	0.2329	1.3793	2.9233	2.4479	1.787	0.9147	0.8881	0.3365	1.387	2.0807	0.4123	0.7071	2.0444	2.1634	2.0532	0.7655	0.6935	1.6202
U73166.1	0.8061	0.6749	0.4991	1.1967	0.0356	0.272	1.4931	0.086	0.3647	0.8164	4.4565	0.2676	0.0902	0.4025	1.4365	0.0221	0.1094	0.0523	0.4574	0.2519	0.3285	0.2419	0.0995	0.4521	0.7129	0.1402	0.1762	0.1075	0.3914	3.0611	1.0222	0.423	0.2562	1.0986	0.6587	0.1475	0.1817	0.2016	0.2139	1.0287	0.7211	0.131	0.7881	1.262	0.9333	0.4303	0.2483	0.1889	0.3679
OIP5-AS1	49.3628	34.5003	27.9118	24.5288	25.7926	37.5792	11.8309	42.6841	35.4283	23.6963	36.2593	17.3723	39.6023	15.2731	25.1894	33.1709	23.4408	20.323	18.6005	37.1763	27.7745	36.4162	42.1533	24.5445	39.332	31.1427	19.8794	39.5149	31.9581	35.4592	23.9891	35.9752	46.8038	35.4555	41.1752	35.9171	12.5803	48.3063	37.3243	28.8574	47.7429	35.8719	38.1093	30.7039	12.504	34.8138	18.8338	42.3963	22.2169
AC026254.2	1.0741	0.6256	0.3695	0.81	0.5694	0.1812	0.4291	0.6878	0.8005	0.8795	1.1096	0.4279	0.3607	0.3352	0.4176	0.4118	0.2915	0.6267	0.4063	0.3836	0.1592	0.2865	0.4418	0.5164	0.5541	0.327	0.3521	0.1911	0.0773	1.2444	0.9906	0.0705	0.1517	2.3178	0.6034	0.3932	0.2076	0.5971	0.0814	2.0701	0.3976	0.5987	0.1556	0.8505	1.5708	0.2867	0.1985	0.6713	0.5252
FLNB-AS1	2.1393	1.2148	2.5314	1.9091	0.441	0.5614	0.7666	0.3897	0.167	1.0081	1.5716	0.1136	0.6865	3.2226	0.4991	0.2031	0.1161	0.1294	0.7769	0.433	0.6764	1.5218	0.0704	0.259	3.7526	0.4466	0.0623	0.4566	1.652	1.0282	0.1973	1.3847	0.4433	1.96	1.2529	0.4438	0.5512	0.3013	0.4434	1.1887	0.6511	0.8214	1.2189	2.6179	0.0348	0.533	0.2284	0.4012	0.6695
AC132872.1	11.9519	12.472	16.8711	15.8564	2.8159	9.8076	13.2476	4.4223	2.545	15.6061	8.6038	18.3998	3.3694	7.405	30.8673	16.2941	2.943	6.0267	15.6065	5.534	10.365	7.6755	5.3167	11.5392	11.9735	6.3535	3.87	2.2835	4.8726	24.7886	14.7999	10.0476	4.4401	12.3174	9.7217	6.8061	2.8514	5.7583	1.9469	17.0172	10.2137	5.1403	2.7251	19.3094	29.9953	8.271	9.4358	4.2195	8.7156
AC244453.3	0.2305	0.2517	0.6343	0.2173	0.2036	0.5185	0	0.0984	0.1227	1.1921	3.0866	0	1.419	0.2877	0.2987	0.1263	0.1564	0.1494	0.3488	0	0.5124	0.1537	0.5688	0.7387	1.444	0.1003	0.1259	0.615	0.5804	5.1926	0	0.3024	0.8141	0.2618	0.9418	0.2109	0	0.2563	0.0874	1.3207	0	0.2141	0.8347	2.3228	0	0.8203	0	0.5403	0
AC005962.1	1.4604	0.8269	1.3396	0.4589	0.5018	1.0037	1.2376	0.5542	0.691	1.2588	1.1175	0.7542	0.0908	1.418	0.6309	0.3555	0.2202	0.526	0.4911	0.7245	0.9619	0.4329	0.5339	0.4334	1.4351	0.3529	0.798	0.5773	0.8755	0.2089	1.1224	1.0645	0.2292	1.8429	0.8288	0.297	0.1568	0.7216	0.1846	1.0143	1.1012	0.4522	0.0588	1.5768	0	0	1.3995	1.5213	0.4232
LINC00996	1.3158	0.5144	1.0393	4.5937	0.3229	0.3562	0.708	0.7282	0.1297	0.168	0.2424	1.1649	0.8728	0.3042	0.2842	0.1602	0.3306	0.2843	2.8573	0.3916	0.2889	0.52	0.7617	0.1302	1.4367	1.3353	0.1598	0.7802	0.5434	0.6273	0.9551	0.1279	2.8915	0.5811	0.5725	0.2899	0.1883	0.3793	0.3695	0.3808	5.6821	0.2943	0.0882	3.1044	0.1188	0.1734	0.2252	0.3427	0.6354
AC084117.1	8.2286	8.2729	4.0435	23.824	3.2888	2.8645	11.385	1.0037	0.4172	5.2352	1.4992	3.1222	1.0965	25.4366	6.6023	1.7171	0.2658	1.7782	9.0418	4.5487	3.7745	12.8045	0.6447	3.5583	7.9419	1.3634	0.4282	1.0455	4.6514	4.2876	20.1027	1.2853	4.4285	5.3403	26.0167	2.1517	9.3387	1.307	4.7541	0.8164	7.9773	6.9162	0.4257	7.6154	0	0.3486	4.4659	2.7553	6.3865
LINC01252	1.3533	0.2593	1.4047	1.175	0.2307	0.3872	1.1641	0.1318	0.4929	1.013	2.1711	0.6464	0.4651	0.1334	0.4924	0.1301	0.145	0.1847	2.0029	0.424	0.8445	0.7917	0.4492	0.7102	0.7699	0.4234	0.2335	0	0.5295	1.6505	0.6296	0.0623	0.2516	0.2427	0.5942	0.2825	0.0535	0.0924	0.108	0.4081	0.3369	0.1213	0.4385	1.5467	0.1447	0.3591	0.0585	0.1484	0.1935
AL050343.2	1.2796	0.4658	1.2004	0.7401	0.8993	0.9812	0.7605	0.2235	0.3715	0.9526	0.3338	0.1931	0.5859	1.0528	0.7162	0.5097	0.1184	0.0754	0.7261	0.779	1.0343	1.5127	0.8134	0.4971	1.3289	0.5059	0.1907	0.4138	0.8787	0.861	0.7711	0.2289	0.5752	1.2551	1.5447	0.6121	0.0937	1.2286	0.441	0.8483	1.4353	0.9455	0.1685	0.5861	0	0.621	0.2867	0.7725	0.3034
AC131159.1	2.4835	1.4464	0.6834	0.4682	0.4388	1.1172	1.0824	0.4241	0.2644	1.4985	0.5701	0	0.556	0.9301	0.6438	0	0.6739	0	0.7516	1.3306	0.7361	0.9937	0.8172	0.5306	1.2813	0.6481	0	0	1.2507	0.9591	0.2863	0.3258	0.3509	1.4103	1.5221	0.9092	0.16	1.1045	0.565	0.7762	1.2257	0	0.1799	1.2514	0	0	0.153	0.7761	0.4857
AC012615.1	1.5474	0.8598	3.3618	1.0364	0.6476	1.0992	1.7156	0.9041	0.5636	2.7379	2.3994	1.9468	1.2763	1.4234	1.6362	0.803	1.3813	0.7392	1.9102	0.8	2.1726	1.3579	0.536	1.0441	1.8908	0.3542	0.9346	0.3622	0.9375	6.6577	2.676	0.8549	0.8054	1.3412	1.9967	0.7454	0.2098	0.5433	0.247	2.1637	2.0601	0.7944	0.3539	3.6348	0	0.7246	1.1039	0.5727	1.3009
RGMB-AS1	0.4935	0.294	0.3087	0.5075	0.3171	0.1766	0.3096	0.2299	0.6449	0.3674	0.9442	0.2681	0.4269	0.6161	0.378	0.0983	0.7914	0.32	0.1358	0.6811	0.266	0.2095	0.6644	0.2397	0.8102	0.3903	0.2697	0.1197	0.1775	3.0612	0.75	0.6475	0.4437	0.3822	0.3666	0.1232	0.1012	0.1995	0.3572	0.3739	0.1938	0.4168	0.065	0.4844	0.0547	0.3194	0.4284	0.1402	0.234
AC073912.2	0	0.243	2.7552	0.1573	0.4423	0.3754	0.3636	0.1425	0.1777	0.5754	0	0	0.5604	1.0416	0.4326	0	0.2264	0	0	0.8941	0.2473	2.0031	0	0	0.6149	0.1452	0	0.5937	1.4407	0.6445	0.3848	0.2189	0.2357	0.9476	0.1705	0.7636	0.3225	0.1855	0.1265	0.5215	0.8236	0.155	0.6043	1.0811	0	0.5939	1.028	0	0.1088
PHKA2-AS1	1.3747	2.3219	3.7829	0.8293	0.9716	1.4842	5.6119	2.3007	1.61	2.5595	0.1473	2.2272	1.3233	3.6039	1.4967	1.4759	1.8279	0.7486	0.7072	0.491	0.9371	2.1636	1.5832	2.5261	5.4509	1.2676	0.9915	0.9781	1.9385	0.177	0.6339	0.3968	0.6215	1.0305	2.7523	2.8937	0.0177	1.4673	1.105	0.2578	0.882	0.7662	0.0597	4.5716	0	0.4893	1.8971	1.2459	0.717
FAM13A-AS1	3.2558	2.8428	4.1969	3.9918	1.3713	2.062	2.0467	0.3417	0.4088	4.2329	1.0181	0.9696	1.1442	2.3428	4.9068	0.6221	0.5137	0.6241	1.9149	1.188	2.8854	3.2389	0.3114	1.9414	2.3278	1.1103	0.2955	0.5387	2.9571	0.6405	2.9056	0.816	0.3591	2.1253	4.6682	1.2325	0.2648	0.9621	0.8735	0.5578	2.7293	1.6831	0.4975	2.0243	0.0132	0.6544	0.5797	1.1324	1.2588
SUCLA2-AS1	0.9583	0.2093	0.5274	1.4453	0.3387	0.8622	0.7657	0.6546	1.1223	0.2478	2.7132	0.509	1.609	0.7178	0.621	0.315	1.0402	0.9941	0.58	0.3423	1.7042	1.406	0.6307	0.4095	1.1301	0.5002	0.3142	0.8523	0.7584	1.6037	0.4419	1.0059	0.4061	1.5237	0.7831	0.5262	0.6173	1.3851	0.654	1.7971	2.1283	0.9793	0.1388	1.1727	12.847	0	1.1808	2.3959	0.7497
MIR4458HG	0.6598	1.7025	5.9005	1.6515	0.4016	2.0282	2.3802	4.269	0.1951	2.9509	0.0505	6.6685	2.913	1.629	3.5915	0.9075	3.7597	4.8572	2.9727	5.0928	6.6269	2.8453	3.8234	2.3182	2.3233	3.3414	3.3166	2.7253	2.2995	3.4351	2.7805	4.5878	1.6881	2.3229	5.9381	0.2281	0.4769	1.8338	1.462	3.7957	0.4613	4.9713	5.4208	4.691	17.493	2.896	1.6981	2.2796	1.0992
AC025162.2	1.5114	0.3439	1.0398	0.5343	0.0835	0.5312	0.892	0.0807	0	1.3842	0.506	1.8817	0.5287	1.0613	1.7141	0.3105	0	0.245	0.4288	0.3374	0.42	0.378	0	0.2018	1.8798	0.1643	0.4129	0.168	0.3398	0.8512	0.4356	0.2479	0.1334	0.4291	1.4474	0.6052	0.1825	0.105	0.0716	1.3777	0.9324	0.1755	0.2737	1.1559	7.1376	0.1681	0.9311	0.2952	0.6158
FAM3D-AS1	0.2335	0.1913	0.3213	0.0275	0.3353	0.0657	0.2545	0.3241	0.0311	0.1007	0.0447	0.6978	0.8496	2.0409	0.5297	0.1279	0.0792	0.1893	0.0663	0.1564	0	0.8956	0.7205	0.2807	6.8637	0.1016	2.8075	1.8694	0.9031	0	0.2019	0.1149	0.165	0.0332	0.0298	0.1603	0.0376	0.1623	0.155	1.8552	0.6484	1.6543	0.0846	3.005	0.4269	0.2597	0.1079	0.9124	0.8945
PSPC1-AS2	2.8137	1.1267	4.065	3.7133	1.4916	1.7405	1.9417	1.9221	1.0485	5.2146	1.9378	2.4288	1.4173	2.1076	5.1057	1.3871	0.1909	1.4594	5.4284	1.2563	0.834	2.0641	1.1574	4.6594	1.9701	1.2238	1.0762	1.7518	2.5304	1.8111	2.5951	2.215	1.9875	1.2783	3.8802	0.9013	0.725	1.2513	0.1067	1.4657	1.7359	1.0456	1.5284	2.1267	1.3717	1.0014	1.9068	1.9786	2.7516
AC003965.1	0.2489	0.6796	0.0856	0.9973	0.1649	0.42	0.0904	0.4783	0.3976	1.2338	1.5715	0.9917	0	1.2431	1.2906	1.2272	0.4222	0.7262	0.4238	0.3334	0.0922	0.498	0.6144	1.1303	0.6421	0.2165	0.3401	0.1107	0.403	5.7682	2.4394	0.4083	0.0879	1.2723	0.5086	0.4556	0.3207	0.2768	0.5191	0.5835	0.3839	0.7516	0.3155	2.195	6.2193	0.2215	0.3067	0.6807	0.8115
MALINC1	3.4456	1.6723	3.0288	3.2202	0.9497	1.5898	1.3049	1.6219	3.3314	1.8087	2.862	1.0853	1.6482	1.6911	1.8035	2.0809	1.5583	0.8114	0.8244	1.5384	1.6912	1.5614	1.7685	2.3675	3.0224	0.9863	1.4161	1.087	1.3772	1.2131	0.8827	1.5552	0.9881	1.5887	1.7598	2.1157	0.4742	1.8254	1.3845	1.8562	1.5988	1.5799	0.7039	2.0562	0.0179	1.4411	0.7756	1.5876	0.6912
AL358072.1	0.92	0.134	0.5063	1.3875	0.1626	0.5173	1.9379	0.3142	0.4897	0.7137	0.2112	0.6109	0.4119	1.1485	1.7886	0.4031	0.1248	0.3579	2.0185	0.3286	0.5453	0.6135	0	0.688	1.6951	0.1601	0.2011	0	0.8604	2.0133	0.6364	0	0.13	1.2538	1.5975	0	0.237	0.1023	0.0698	1.0543	1.7027	0.3419	0.1333	1.8542	0	0.1637	0.5101	0	0.3599
AL159169.2	1.4173	1.2443	1.3765	1.8468	0.6997	1.5002	5.0567	0.2136	0.2663	2.7308	1.7225	1.0518	0.8399	1.1449	2.3232	0.5937	0.3959	0.4865	2.6491	0.8934	1.0502	0.6672	0.2058	0.4008	1.3825	0.7615	0.4555	0.0741	1.5295	2.3075	1.3937	1.9142	0.53	1.9884	2.129	0.6867	0.2954	0.0927	0.3793	1.1726	1.8002	0.1549	0.5434	1.7403	2.4385	0.5192	0.5393	0.7165	1.1686
AC097504.2	0.6991	0.2545	1.1222	0.1098	0.3088	0.7863	0.931	0	0.1241	0.703	2.3182	0.4642	0	1.4546	0.6041	0.2553	0.7904	1.5108	0.1763	0.4162	0.1727	0.1554	0.1917	0.1245	0.1718	0	0.1273	0	0.8383	0	2.1493	0.1529	0	0.9263	0.5951	0.7465	0.1501	0.1295	0.8835	4.2486	0.7188	1.0824	0.1688	0.5032	0	0	0.1436	0.1821	1.6712
AC009242.1	4.098	1.8202	5.3023	0.3012	0.2989	0.8457	6.9093	0.1605	0.1601	1.9444	0.4315	1.4229	1.6202	0.8683	1.2182	0.2471	0.051	0.195	0.2276	0.3357	1.3093	0.9026	0.1856	0.5422	13.9241	0.2126	0.0822	0.1338	0.3111	0.0968	0.0867	0.1726	0.2656	0.3416	7.7192	0.2925	0.0727	0.2299	0.114	0.9596	0.2088	0.1222	0.0408	4.9254	0	0.1004	0.4169	0.0294	0.2206
AL136531.1	3.747	2.4872	2.5777	1.4544	1.1684	1.8592	3.3621	0.6587	0.8213	3.6098	5.1442	2.927	0.8635	1.7885	3.2853	1.4488	1.3457	2.4292	1.5842	1.9682	1.3066	0.8819	1.4505	4.1208	3.98	0.6711	2.0474	1.5682	1.4271	5.6748	2.287	1.1567	1.4012	4.3807	3.6023	2.0172	1.1358	1.2253	1.2535	6.4295	1.9037	1.638	2.7936	2.0625	0.5372	0.9805	1.29	1.5499	0.934
SEMA3B-AS1	0	0.4558	0.4307	2.2129	0	0.352	0.7958	0.1336	1.1664	1.349	16.6466	0.2078	0.1752	1.3676	1.4199	0.1715	0	1.4205	3.197	0.2795	0	1.0437	3.0899	2.1736	1.0381	0.5446	0.3421	1.9487	0.4504	8.4618	3.6086	6.7761	1.7688	4.6214	0	0.8594	0.4032	0.348	1.7802	12.3916	1.1586	1.1631	4.5339	3.6049	48.8281	2.5065	0.2892	0.9782	0.6122
AC010504.1	2.7127	1.58	2.6127	0.5967	0.719	2.7458	0.9196	1.081	1.7329	1.403	2.837	1.6812	1.5183	2.0319	1.758	2.7737	3.0672	1.2897	1.7787	0.4845	0.804	1.5679	1.6365	2.0287	2.1326	1.2585	0.7905	1.7693	0.8457	2.4445	0.5212	2.966	1.6607	1.7459	1.8473	2.2344	0.4077	1.1059	1.9885	1.6015	2.6777	1.764	0.7204	1.8225	0.2204	3.2182	1.0584	1.413	1.238
EIF3J-DT	17.9545	10.0489	15.9141	5.2276	6.605	11.5092	5.3302	7.8093	6.9319	10.8678	21.2065	10.2738	10.4945	8.6443	9.5705	15.2555	7.9193	6.1975	5.401	13.2694	14.4164	14.0988	8.973	9.7709	14.6669	9.5548	8.2536	6.9215	6.9656	8.6182	4.0975	10.6327	7.3152	8.8387	16.9005	11.2725	1.9144	13.8474	4.8326	17.0613	11.9651	14.3026	8.0108	13.6848	4.8543	11.1497	4.2187	7.4928	5.3933
AP001458.1	0	2.093	3.1645	2.71	0	0	1.6706	0	0.6122	1.4869	0.44	0	1.9308	0.7178	0.7452	0	0	0	1.74	0	0.8521	1.5338	0	0	2.5427	0.5002	0	0	2.0683	1.4804	3.3144	0	0	1.3061	1.1747	1.0525	0	1.2785	0.436	0.599	4.2567	1.0683	0	1.2416	0	0	0.3542	0	1.1246
AL356299.2	1.4443	0.9201	1.3662	1.872	0.7178	0.5076	0.7869	0.2312	0.0961	0.8559	0.3454	0.8391	0.3031	0.4508	1.755	0.1978	0.4899	0.117	1.9123	0.3224	0.9364	0.7224	0	0.7715	1.9959	0.2356	0.0986	0.1606	1.4937	0.9297	0.5204	0.1184	0.6376	0.6151	1.4754	0.4131	0	0.4015	0.2054	0.6583	1.8935	0.2516	0.3269	0.5848	0.22	0	0.5561	0.5642	1.9421
AC116025.1	0	1.6584	2.9601	0.7158	0.6708	1.7079	2.482	0.1081	0	1.0908	0	4.2015	0.7083	1.7378	0.4921	0.5546	0	0.3282	0	0.904	1.8754	2.8695	0	0.4056	4.7568	0.4403	0.5532	2.026	0.7284	0.1629	0	0	0	0.1437	7.4976	0.4633	0	1.1256	0.1919	0.1318	0.6246	1.0581	0.0917	2.7328	0	0.4504	1.2474	0	0.2475
AC024267.3	1.6943	1.302	1.9426	1.5083	0.5821	1.1645	1.9828	0.2411	0.3006	0.9736	1.0804	0.5	0.6322	0.94	1.098	1.0312	0	0.3661	1.4954	1.0086	2.0923	2.1342	0.3097	0.4022	1.5956	1.3919	0.2057	0.1674	0.8803	1.0905	0.217	0.6175	0.6649	1.1759	2.8844	1.1199	0.1819	0.5232	0.7851	0.8825	1.1614	0.6121	0.2727	1.0163	0.9177	0.335	0.8698	0.4412	0.9205
AC025287.3	2.534	1.8449	3.0508	2.7868	1.3993	1.9	1.4572	0.5409	1.7986	2.1843	1.6967	0.1402	1.5364	1.3181	1.5054	1.2724	0.1433	0.8214	1.8373	1.32	2.5036	2.6758	0.1737	2.3688	3.0349	0.6429	0.1154	0.9391	1.7471	2.8544	1.8259	0.5541	0.7458	2.9979	4.2063	0.8697	0.3401	0.4696	0.2402	3.63	2.4753	1.4713	1.1471	1.9761	0	0.1879	0.5854	0.66	1.4456
AC008537.4	1.151	0.4539	0.9238	1.311	0.4661	0.3776	2.0902	0.1229	0	1.1575	0.2202	0.828	0.3758	1.2573	1.6162	0.1576	0.0651	0.2487	2.5399	0.3426	0.4264	0.4478	0.1578	1.0247	1.0251	0.4589	0.4193	0.3412	0.7246	0.8643	2.4328	0.2517	0.2033	0.7081	1.4207	0.3511	0.1545	0.0533	0.4	0.5996	1.1835	0.2673	0.2431	1.0011	0	0.256	1.0932	0.4496	0.6879
AC018904.1	11.3214	8.0292	8.46	13.8	7.5881	9.6594	10.1378	3.0834	10.2872	11.7779	4.5557	19.5711	5.0254	16.2047	10.4994	10.799	9.7992	7.5929	12.4789	12.027	7.0872	4.1656	7.3866	17.3087	8.9916	10.1878	12.9057	9.2012	17.4839	9.9256	15.9778	20.1041	11.582	13.5232	6.6796	9.0216	6.5381	13.0213	7.7709	7.6259	21.5557	8.976	4.0291	9.7652	0.2379	11.8099	11.6646	16.0134	10.6898
LINC00893	1.0861	0.9617	1.2117	0.8025	0.1686	0.4292	2.9639	0.0752	0.1406	1.9357	2.5159	2.2805	0.3286	0.7879	2.5112	0.2251	0.0797	0.1142	1.6324	0.2359	0.7178	1.0572	0.0724	1.1761	1.9472	0.1532	0.2085	0.0783	1.0665	1.2282	1.2014	0.0578	0.1244	0.3167	1.8291	0.4702	0	0.1469	0.089	0.7187	1.2134	0.4227	0.202	1.8912	0	0.0522	0.2803	0.1376	0.2966
AC135803.1	9.1753	5.7256	31.1744	7.2369	4.1359	11.4774	31.9638	5.756	8.9713	10.4107	1.5762	16.039	4.5064	11.688	6.6742	6.9746	3.0487	2.9135	7.5084	6.6883	19.1474	19.6057	2.7727	14.4035	8.3495	2.2804	5.7297	9.6593	17.5804	0.4821	20.4005	3.808	1.8518	3.19	18.0753	2.2278	0.4222	8.2234	2.0589	2.6336	10.3969	8.5236	1.1527	12.9395	8.2154	6.331	5.5372	7.6076	0.4883
AC090510.2	2.1866	1.5307	1.5043	1.427	0.2229	1.0404	2.4435	0.0718	0.2686	2.4647	0.7722	0.8935	0.5648	1.5748	1.417	0.4607	0.5705	0.2181	1.3362	0.6008	0.9971	0.7852	0.2767	1.6172	2.7273	0.0732	0.1838	0	1.0286	2.49	0.2909	0.5517	0.3564	1.3372	2.749	0.7697	0	0.748	0.1275	0.5257	0.8301	0.7031	0.6091	1.6345	0.205	0.8979	1.3989	0.2628	1.1514
AC006369.1	1.4568	0.3535	0.5428	0.9441	0.1877	0.2731	0.97	0.6219	0.4201	1.0987	0	0.7658	0.6455	0.2652	0.1573	0.1995	0.9471	0.7083	2.1813	0.542	0.2249	0.3238	0.4993	1.07	0.4921	0.7656	0.995	0.2699	0.5895	0.7423	1.8544	0.1593	1.3291	0.7583	0.31	0.6388	0.215	0.5399	0.3912	0.6007	2.5838	0.8458	0	0.6772	0.074	0.5941	0.3926	0.9011	1.108
AL355075.2	3.7626	2.0948	3.0453	1.5648	1.2711	1.3691	1.4469	0.567	0.2356	5.4373	1.609	0.2939	0.8671	1.9341	2.7253	1.2124	0.4505	0.287	2.0932	0.3953	2.46	1.7713	0.1821	0.9458	5.7095	0.7701	0.1209	0	1.4331	4.7013	0.2552	0.2904	0.469	2.1367	4.4087	0.9115	0	0.3691	0.5035	5.0729	3.8233	1.4393	1.042	3.9033	0	1.3785	0.6136	0.6917	2.4531
AC009097.2	0.2275	0.3313	2.8174	0.9651	0	0.6397	2.9748	0.2914	0.3634	0.1961	0.3482	1.9639	0.1273	0.9941	1.0321	0	0	1.475	1.9795	0.2032	1.5173	1.0621	0	2.9168	4.3599	0.1979	0.373	0.2024	0.9821	0.1464	0.5246	0	0.4821	0.1292	2.0917	0	0	0	0.1725	0	1.9651	0.317	0	1.0645	0	0.2024	0.6308	0.1778	1.0383
AC010776.2	0.2936	0	0	0	0	0	0.0711	0	0	0.0422	3.2578	0	0	0	0	0	0	0	0	0.2622	0	0	0.161	0	0	0	0	0	0	0.441	0.3385	0	0	0	0	0	0	0	0	0	0.4226	0	19.28	0	0.1193	0	0.0301	0	0.1276
AC087752.4	0.687	1.5838	2.8357	1.4031	1.8209	1.5453	3.0773	0.7821	0.9752	1.283	0.9638	0.7603	0.769	1.1435	1.484	1.0035	2.4856	0.7423	1.0395	1.6359	0.6787	1.2217	0.5651	2.2018	0.6751	0.5976	1.3764	1.6293	2.3889	1.7688	2.7721	1.352	0.1618	1.5605	1.1696	1.4671	0.2213	2.0368	0.6946	1.9086	2.2604	1.2764	0.5805	2.7198	0	2.445	1.2697	1.6103	1.3437
AP000553.2	0.9842	0.3582	0.6771	0.116	0.4348	0.2767	1.6085	0.105	0	1.9087	0	2.4505	0.6885	0.3072	0.4783	0	0.5007	0.7976	2.606	0	0.1823	0.4922	0.2024	2.1028	3.8987	0.107	0.5378	0.2188	0.354	1.2669	1.1346	0.1614	0	0.978	1.131	0.4504	0.0792	0	0.0933	0.5127	0.4554	0.1143	0	0.8855	0.2999	0	0.6063	0	0.2406
AL513165.1	13.5449	19.9887	20.3994	24.3282	21.6698	28.4084	12.232	8.4397	9.7439	28.3997	9.8045	14.3414	13.1127	26.5064	15.1833	21.2553	17.881	10.9174	5.9547	12.7489	6.7814	31.4936	19.5749	26.5948	23.4734	18.3105	15.4024	15.6282	9.4814	32.9884	5.4866	22.0939	9.3091	12.4731	8.7876	14.7416	2.5938	22.5891	13.1859	9.5346	10.163	17.3439	5.4352	18.4457	223.966	13.3543	14.2083	10.0107	5.728
AC207130.1	0.0904	0.2469	0	6.265	0.0399	0.0254	0.0821	0	1.2516	1.0133	0	0	0.0253	0	0.3223	0.0248	0.0307	0.1466	0.3934	1.6149	0	0.0603	0.186	0.0242	0.0333	0.0787	0.2223	0	0.0163	0.0582	2.3195	0.0593	0.4152	3.7228	0.3002	0	0	0.0251	0.2228	0.0942	0.1952	0.021	0.0327	0.1139	0	0	0.0557	0.0706	0.5158
AC092118.2	0.6345	0.8083	0.6547	0.5233	0.0701	0.446	1.2674	0.0677	0	2.3927	0.1821	0.6319	0.1775	0.7921	2.6726	0.6082	0.1076	0.5142	1.26	0.2833	0.1175	0.7405	0.1305	1.2709	0.7599	0.138	0.26	0.1411	1.2553	0.8168	0.3657	0.5203	0.112	0.9007	2.2683	0.3629	0.1022	0.4409	0.1804	0.4957	0.9785	0.1473	0.0574	1.5414	0	0	0.342	0	0.3619
AC012313.5	3.1525	1.4077	3.9616	1.0104	2.451	4.0655	1.3739	0.7896	0.6937	1.1956	2.6696	0.8094	2.1878	4.2241	1.4165	2.2563	1.5398	0.9265	1.2402	2.1394	2.2425	1.0372	0.8645	1.0553	1.0688	2.4132	0.5512	1.3832	0.7258	7.2507	0.9934	2.5368	1.3658	1.2651	3.7783	1.9427	0.3114	3.1778	1.6574	6.1306	1.6855	3.7876	2.9986	1.9515	0.7172	0.7106	1.1653	1.7406	1.4387
GTSE1-DT	1.0454	0.5835	0.7671	0.7555	0.3387	1.4893	1.2656	0.4166	0.4081	0.7209	6.4798	1.2032	0.4291	0.8701	0.6323	0.9162	0.7565	1.22	0.5273	0.5601	0.8263	0.6972	0.5733	0.6701	1.541	0.8184	0.4951	0.4959	0.4011	5.8318	1.2454	1.3716	1.1323	1.1082	1.5662	1.18	0.1571	0.6586	0.5021	5.0826	1.1179	0.518	1.06	0.6773	1.0193	1.4882	0.6655	0.8168	0.5453
AC006272.1	0.7666	0.2093	0.923	1.897	0.8467	0.7544	0.4873	0.1637	0.4081	0.7434	0	0.6363	0.4291	1.316	0.621	0.21	0.3901	0.8698	3.4801	0.3423	0.142	0.1278	0.473	0.819	1.342	0.5002	0.3142	0.1705	0.5516	2.2206	2.983	0.1257	0.6769	0.9795	1.0768	0.2631	0.5555	0.2131	0.436	0.3993	2.4831	0.4451	0.1388	1.3106	0	0	0.4133	0.1497	1.1246
AC068051.1	1.7263	2.4837	2.3752	0.0387	1.3799	1.849	0.8061	1.088	0.1313	2.4092	0	0.5458	2.6224	0.4105	1.2785	1.3508	2.1749	1.2791	0.0311	2.5692	4.3247	0.7127	0.8115	0.7904	0.3029	0.286	0.539	0.1462	0.2366	0	0	0.1618	0.1742	0.0467	2.4771	1.2414	0.2383	2.9247	0.4052	0.3854	0.5579	0.3436	0.0893	0.7396	0	4.681	0.2279	0.578	0.2144
BX537318.1	8.9406	6.6047	9.2863	2.1069	2.5943	5.9641	7.131	5.1642	7.6524	7.8955	4.3933	11.291	5.985	8.3162	7.2709	8.3061	4.1624	8.7513	3.5479	4.6962	5.7155	7.1315	7.9318	5.1972	10.4656	6.9004	7.0405	4.9893	2.8377	5.9804	9.0948	6.1526	3.9007	8.6111	10.3861	5.9764	0.8751	5.9447	4.0545	12.1452	4.3801	6.1477	0.857	7.1927	10.2551	3.1975	5.319	6.6429	3.1716
AC010173.1	1.6019	1.1132	1.1521	0.858	0.6111	0.6961	1.428	0.7772	0.8915	1.8201	1.1143	2.2723	0.652	1.0908	2.784	1.3162	0.8891	0.5193	0.8539	1.3654	1.4567	1.5053	0.7188	0.9724	1.0196	0.7917	0.6366	1.1657	0.7334	4.7335	0.8814	0.9076	0.2572	3.0184	0.9297	0.7997	0.3049	0.9714	0.5521	1.2896	1.3925	1.2852	0.29	0.8124	2.3959	1.49	0.6953	1.1947	1.1393
AL359091.3	4.9852	1.8819	4.0647	1.5664	1.5497	2.4919	3.6882	0.8671	1.3761	5.6499	7.3469	5.7621	2.8934	0.8067	7.1793	1.1125	2.0041	1.9152	1.3271	1.1541	2.5994	3.2015	1.5189	2.9588	3.1299	0.4818	2.2195	1.6421	1.594	3.4465	1.3836	0.8479	1.4346	0.8388	2.2632	1.9433	0.773	2.6687	0.63	1.9236	2.506	2.0583	2.4739	2.06	0.225	1.9713	2.3318	1.0098	1.3241
AC099791.2	0.4955	0	0.8523	0.8174	0.1095	0.1393	1.1698	0	0.1319	1.6018	0.6636	0.9871	0.2773	1.3919	0.3211	0.4071	0.1681	0.3213	1.3122	0.4425	0.3672	0.3305	0	0.5294	2.1	0	0.1354	0	0.3565	0.7974	2.2852	0.1625	0	0.8442	0.5062	0.2268	0	0	0.1879	0.3872	0.6114	0.3453	0	0.3567	7.247	0	0.229	0	0.4846
AP001062.1	1.3121	0.7518	3.8281	0.5955	3.3383	1.9266	2.7005	0.4668	0.3234	1.131	0.5392	1.2907	0.7888	1.001	1.37	0.8119	0.6264	0.4253	1.2133	0.933	1.8365	2.4631	2.1788	2.6089	1.4685	0.8243	0.9692	1.2967	0.8566	1.7048	1.2466	0.8289	0.6522	0.7175	0.5709	1.2009	0.1174	0.8645	0.9305	1.5695	1.7839	0.316	0.6775	1.338	0.1777	0.2162	1.1302	0.7594	1.6871
AC004816.1	0.3079	0.538	0.5507	2.1188	0.2176	0.3117	1.5209	0.3418	0.459	0.2123	6.8564	0.368	0.3102	0.3844	0.439	0.2024	0.3342	0.9981	0.7221	0.6049	0.2738	0.0821	0.3546	1.3816	0.6354	0.1339	0.3028	0.1643	0.1329	73.2503	0.497	1.0503	0.348	1.4687	0.4718	0.3382	0.3768	0.1027	0.2568	10.1366	0.152	0.5721	2.2523	0.6871	0.6755	0	0.3035	0.3849	0.7829
AC017104.1	1.6562	1.7122	0.9571	0.8118	0.7024	2.0862	5.1249	2.9415	1.7633	4.1115	0.1521	3.431	1.2606	3.3081	3.177	2.9393	1.6179	2.9205	3.0323	2.1888	1.129	0.972	1.4169	2.1233	2.7342	1.0085	1.1945	1.4141	1.4775	2.5158	5.4608	0.8692	1.3571	2.1819	1.8609	2.2736	0.8321	1.8782	0.427	1.0007	1.8391	2.6771	0.6477	3.7433	3.068	2.5935	1.8162	1.2422	1.2741
AP001469.3	1.0222	1.4545	1.2466	0.5256	0.5747	0.8361	1.3669	0.1984	0.0742	1.5419	0.64	1.4192	0.7021	1.0731	2.0174	0.6108	0.3152	0.2109	0.5097	0.8298	0.5853	1.9211	0.5733	0.968	1.6609	0.9498	0.6855	0.4132	0.7855	1.9439	0.4821	0.6706	2.3631	1.5567	0.7831	0.404	0.2394	0.9299	0.6166	0.6777	0.7453	0.41	0.4375	0.9197	1.9819	0.3307	0.3435	0.2904	0.1969
AC012313.1	7.0283	3.7418	8.0089	7.457	3.3236	7.7304	2.0241	2.6834	4.7634	5.3243	20.6007	2.9193	4.6441	6.2617	4.4143	3.1884	2.2685	3.1715	2.3073	3.5666	4.1066	5.9467	4.8139	5.2759	7.8157	4.3631	1.7426	4.2683	2.829	11.4392	3.3197	5.1185	4.221	3.7099	5.851	3.5137	0.5983	3.2358	2.9818	18.4345	5.6158	4.7027	5.6621	9.7839	3.9998	3.1405	2.4129	4.6446	2.9067
LINC01355	5.425	2.6601	4.7447	6.2673	1.0433	1.8958	4.1893	0.3945	0.3462	8.1945	1.0935	2.0568	1.4367	4.9565	4.0481	1.7717	0.4876	1.0429	5.5092	1.0239	3.297	4.4168	0.3801	3.1539	4.5281	0.8039	0.5143	0.4566	4.7525	6.5432	5.4652	0.7634	1.1001	2.9544	5.9786	1.8717	0.2535	0.9038	0.7138	1.248	4.4871	1.6614	0.8304	3.8558	0.4588	0.9441	1.7027	1.5243	1.7182
AC127070.1	0.9531	0.1388	1.5737	1.2578	0.421	0.3216	1.2462	0.3255	1.1163	0.4929	3.355	0.7594	0.9602	1.0709	0.6177	0.5221	0.1293	0.2472	1.6585	0.8511	0.4237	0.2543	0.1568	0.2037	0.562	0.1658	0.625	0.1695	0.8914	5.276	1.2087	0.2501	0	5.196	0.8762	0.6106	0.1228	0.2119	0.1446	6.2557	0.8232	0.1771	0.5522	0.6175	0	0	0.5872	0.1489	0.5593
AC002553.2	4.7944	3.8395	3.5182	3.6155	2.4003	2.6961	3.7148	0.6823	0.6806	7.1633	2.4458	0.4245	2.6833	2.1946	7.2498	1.2255	1.5178	1.865	2.9018	0.5708	3.0789	4.05	3.1553	2.7318	7.0672	1.1121	2.0958	0.5685	5.4039	4.5261	2.7637	1.2581	2.9351	1.8151	7.3461	1.6089	0.9265	1.4215	1.2119	1.1655	5.1269	2.5239	1.2732	7.3624	0	0.5688	0.8861	6.2432	2.0838
AC009301.1	11.6968	2.7747	9.403	0.4955	1.045	4.9516	12.4104	2.581	0.8396	3.8517	0	1.3962	3.8984	2.379	7.0691	4.1753	4.4579	1.6189	1.1435	2.3471	6.4273	0.5259	2.9191	4.9142	3.5839	0.8574	0.5027	2.104	2.6002	0.423	0.6061	1.3795	0.4642	0.2985	9.3302	4.2699	0.1693	2.6301	1.2457	1.643	1.9459	3.3575	0.1428	4.4936	0	1.1693	2.8338	1.1295	0.7711
AP001830.1	7.6443	5.9548	7.5728	0.7926	2.0261	5.5882	5.7193	4.8301	1.2208	11.2675	6.9609	10.9636	6.1608	5.6304	12.7811	9.5468	1.8669	3.37	1.5037	5.5974	7.5901	3.8744	4.402	7.2684	13.2399	3.5908	6.5996	6.1189	2.8048	13.8753	4.1421	10.9321	3.8878	6.3378	4.2166	3.2182	1.4772	3.9095	1.681	2.1502	3.5841	7.1723	0.8305	7.1532	1.4906	4.897	10.2664	2.2696	2.442
C1orf220	1.1437	0.3053	1.1016	0.8625	0.1179	0.2787	0.1385	0.293	0.1218	0.6901	0.8315	0.1013	0.5121	1.404	1.1365	0.0835	0.0517	0.346	0.5336	0.4085	0.3107	0.5594	0.1255	1.5885	1.714	0.1327	0.125	0.0339	0.3291	1.0307	0.8571	0	0.4578	0.6062	1.7914	0.2617	0.0123	0.4027	0.0578	1.0724	1.129	0.2479	0.3037	0.5077	0	0.1357	0.1879	0.3574	0.4225
AC009779.2	15.4699	10.2484	17.7545	12.8893	11.6596	13.7292	9.6128	9.9852	11.5528	9.8589	61.7139	17.9151	11.6946	7.1849	12.7336	12.8512	9.9974	11.2652	7.6825	6.3506	9.3985	18.5312	12.7262	24.1251	20.2908	9.5665	16.8259	15.063	11.9209	30.0138	10.9039	9.3789	11.8079	17.3616	13.6304	14.1581	1.6293	11.4529	9.0344	42.9269	11.715	15.2906	11.7617	14.9089	3.9315	8.1542	9.2143	14.8937	9.9662
AC006460.1	1.1015	0.0936	0.2905	1.9987	0.219	0.1136	0.3334	0.243	0.127	0.2136	0.0983	0.2804	0.7089	0.3323	0.4997	0.1106	1.2828	0.2499	3.1736	0.4918	0.1088	0.2081	0.2265	0.5492	0.115	0.2635	0.7022	0.0816	0.35	4.5138	0.582	0.2047	0.3761	1.0321	0.4407	0.6973	0.2483	0.3164	0.3063	0.7937	0.3624	0.2984	0.1064	0.1321	0.0224	0.2123	0.2771	0.2151	0.8558
UBAC2-AS1	1.3285	0.4982	0.7755	0.74	0.8358	0.9055	0.3948	0.4297	0.8572	0.6767	2.9111	0.9356	1.104	1.6836	0.9131	0.5513	1.0378	1.044	0.4416	0.5752	0.8949	1.2081	1.0929	0.6881	0.7714	0.893	0.5499	0.5729	0.4779	5.4416	0.6034	1.0828	0.7109	3.2463	0.5757	0.8106	0.4149	0.7609	0.7174	0.7759	0.5216	0.748	0.8018	0.5796	0.5888	0.7164	0.7068	1.0065	0.3937
AL162274.2	7.0106	3.944	9.646	4.656	2.5339	6.451	7.6386	1.0884	3.9017	7.4164	2.0727	3.8087	5.5288	4.1771	4.7498	5.4111	2.378	2.0659	4.8218	7.1139	3.778	11.4759	1.835	4.9365	5.4019	2.4948	3.1342	0.2834	2.9804	6.3585	5.5108	3.3448	2.476	4.343	10.2536	2.7706	0.7184	3.8973	1.5707	13.4455	5.5046	4.2924	2.4233	6.7667	4.6604	2.2682	2.7485	1.4939	4.8822
AC019257.1	10.3216	3.0285	5.0501	0.8807	0.8058	1.326	7.9661	1.7475	2.1079	3.2405	0.2724	2.5996	2.2161	4.8875	4.6419	0.4874	2.6258	2.4517	4.2411	1.1521	2.2417	0.5341	1.5738	6.0126	6.7056	0.4064	3.4277	2.295	2.2405	0.0573	4.129	0.0876	1.257	41.9893	7.0213	2.3616	0.3152	2.4979	1.2989	4.2178	2.3605	2.8931	0	4.7076	0.9218	1.0292	2.7546	2.7461	1.2907
AC004825.2	1.1626	1.4389	4.6389	0.7671	0.9244	1.3075	2.449	0.9927	0.2476	1.403	6.9392	2.1615	1.4315	1.4514	1.2055	0.3821	0.631	1.9597	1.6712	1.8687	1.7229	1.8608	2.2954	1.3663	1.371	1.8204	1.6517	0.6204	0.5855	101.323	3.0828	2.5931	0.3285	1.7165	2.0189	1.2768	0.7489	2.1974	0.6171	3.997	1.7214	1.512	1.5998	1.2553	0	1.6551	1.3609	1.8167	1.3643
LINC01474	1.0881	0.518	0.7486	0.3945	0.6655	0.3765	0.608	0.5718	0.8466	3.6074	2.0496	0.8336	0.4684	1.4629	0.2712	0.7794	0.1703	0.3256	2.153	1.2706	0.6822	0.8931	0.3443	0.0894	0.4627	0.8737	0.1372	0.7444	0.9635	0.0539	0.193	0.2745	0.4139	0.4278	1.368	0.7277	0.1078	0.1861	0.4443	2.0492	1.6007	1.4773	0.0606	0.3012	0.102	0.7447	0.1031	0.5232	0.573
AL359921.1	1.7133	0.7796	1.0313	1.4132	0.6622	0.4817	0.7778	0.2743	0.228	0.7384	0	0.1422	0.1199	0.5347	0.2776	0.1173	0	0.1388	0.6481	0.5737	0.6348	2.5708	0.1762	1.144	0.8681	0.1863	0	0.381	0.3082	0.6892	0.7407	0.1405	0.7564	1.3378	0.7657	0.882	0.2069	0.1191	0	1.4503	0.5285	0.5969	0.2327	0.4625	0	0	0.1979	0	0.4887
PPP3CB-AS1	3.0264	1.9029	2.2082	1.4524	2.1391	2.197	1.712	0.9005	0.9764	2	2.3439	1.023	2.1968	0.9961	1.0341	1.5472	1.1199	0.8562	1.7901	1.9491	1.6717	1.4679	0.9053	1.2345	1.7169	1.5158	0.6615	1.2561	1.0953	2.3022	1.8609	2.4426	1.8398	1.9373	2.2671	1.2254	0.4844	1.764	0.9597	2.9428	3.0779	2.1555	1.4413	2.0663	1.5648	1.4198	1.1187	0.8598	1.2496
AC024361.1	3.6254	2.3995	3.5145	0.3883	0.2912	1.4827	2.8729	0.2111	0.0877	2.2728	13.9973	2.2978	1.1068	1.6458	2.9902	0.4513	0.1118	0.2137	1.1844	1.7658	2.9306	1.099	0.1356	0.6162	4.5546	0.6451	0.4502	0.7328	2.549	0.7425	1.3299	0.4324	0.582	1.778	4.9658	0.8295	0.2654	0.5497	1.2496	3.777	3.1516	0.9185	5.2515	4.1517	1.0042	0	0.9645	1.1588	1.0744
AC079807.1	3.2134	1.3947	3.6562	1.9806	0.3822	0.834	3.5462	0.686	0.5921	3.3026	0.7566	2.1337	0.8301	1.7744	4.7257	1.1509	1.09	1.4423	2.665	0.8829	1.8316	1.8958	0.5084	3.8292	2.7783	0.6451	1.4857	0.3298	1.3338	3.3412	3.3485	1.2162	0.4365	2.5267	2.5881	1.1311	0.8757	1.0993	0.328	2.5752	2.5162	1.4352	0.8504	1.6903	2.2594	0.9897	1.1421	0.676	1.3698
AL513534.1	7.6348	7.1465	7.5034	10.7953	3.8545	4.9066	13.8645	0.4657	1.1612	6.111	5.425	0	4.273	5.4464	2.8273	2.9872	0.7399	3.5355	11.1399	1.9479	7.2736	9.4559	0	5.2436	6.8328	3.3207	0	2.9101	10.2009	4.9142	6.9159	1.431	3.0817	14.2454	11.6982	1.9964	1.0538	2.4253	2.8947	9.6584	10.7661	4.0529	8.2943	10.5988	0	2.9113	3.6956	4.2608	7.1108
OGFR-AS1	1.5838	0.8071	3.2687	2.3141	0.4897	0.8906	1.323	0.4057	0.8431	1.2969	1.0301	0.8413	0.7091	1.384	0.8211	0.6073	0.5372	0.4107	1.0784	0.5657	0.5868	2.0068	1.0423	0.5922	1.2257	0.2755	0.1731	0.1409	1.2534	0.5097	0.5478	0.3117	0.6712	1.2591	1.7796	1.0871	0.3061	0.088	0.1801	0.7425	1.8565	0.0736	0.2294	1.026	1.7372	0.7046	0.4391	0.6187	0.4646
RNF139-AS1	1.6138	0.3436	1.2883	1.6935	0.2825	0.5565	0.8018	0.2145	0.3566	1.0367	1.0835	0.6571	0.3408	1.0644	1.1544	0.3336	0.2376	0.2468	0.9272	0.4622	1.0379	0.5787	0.1252	0.675	1.6158	0.2781	0.4243	0.2031	0.8708	1.3131	1.018	0.4694	0.2904	1.366	1.3452	0.4319	0.0245	0.2962	0.2251	0.7375	1.4277	0.4809	0.3308	1.4028	0.334	0.1626	0.3517	0.2855	0.5906
AC004803.1	2.105	1.9418	1.3886	1.3862	0.7898	1.3783	0.5551	1.5881	2.763	1.1433	1.7763	1.1679	1.4202	1.3139	1.6444	1.4689	0.5869	0.7665	0.9817	2.0342	0.8547	1.3269	1.0912	0.7856	2.0721	1.1538	0.4884	0.6411	0.8091	13.6974	0.881	1.7214	2.159	3.3568	1.4727	1.1876	0.2879	0.9938	0.9402	0.8111	1.1029	1.5938	1.0338	1.9718	1.4057	2.7452	0.4263	2.2304	0.799
AP000593.3	1.0982	0.6663	0.8815	0.949	0.2426	0.2059	0.133	0.0781	0.0974	1.0255	0.9104	0.4861	0.3073	0.6855	1.8979	0.2005	0.1242	0	0.6232	0.1634	0.5425	0.6103	0.3012	0.5866	0.8094	0.0796	0	0	0.9218	2.1207	0.422	0.1201	0.5172	0.7276	1.0283	0.5026	0.7074	0.3053	0.2776	0.4767	0.5646	0.5101	0.1989	0.0659	2.0077	0	0.1128	0.8581	0.4177
DANCR	2.879	1.4037	3.2033	2.6355	2.9431	1.806	1.7666	1.7173	2.6171	2.7773	5.6151	3.9269	2.9143	1.7841	1.8321	2.1919	1.3961	1.6374	2.7011	3.796	3.3578	2.0032	1.4706	1.3547	1.5934	3.3814	2.5897	1.9875	1.518	29.9778	2.2767	7.957	1.3656	1.8238	1.4333	0.5089	1.7273	2.0685	1.9428	4.0822	3.6164	2.9883	2.8567	1.7843	3.8761	3.1072	2.1771	3.2889	2.558
AC100778.2	1.9714	2.0731	2.8631	2.6842	1.3547	1.4781	1.3524	0.2805	0.1166	2.0769	2.4304	0.4363	0.8581	1.2305	3.1229	0.12	0	0.284	1.4086	0.5868	2.2723	0.5843	0	1.6381	3.5516	0.1905	0.1197	0	1.1031	0.8459	2.2728	0.7185	0.4642	0.9951	3.3562	1.1026	0.0705	0.3653	0.4983	1.2551	1.8919	0.407	0.9518	3.2322	0	0	0.9446	0.8557	1.071
AC007114.1	4.6028	3.276	8.9325	2.2018	4.8557	3.3223	3.2686	1.9944	2.2309	4.5597	5.7038	5.2914	4.7677	5.5746	3.6507	1.9944	3.1226	4.0085	1.9751	2.5152	5.345	6.4141	3.617	2.3119	6.5063	4.9003	5.0677	8.3097	3.3115	2.2552	2.6929	2.4336	1.6499	4.9935	5.2982	2.3892	0.531	3.5899	1.2763	20.04	3.6873	3.2548	1.8907	6.577	6.5306	3.2396	3.7033	2.0397	1.7692
AC010326.3	13.244	9.8122	11.2551	10.4281	3.9233	9.5504	13.8079	3.3261	2.9031	14.7066	12.4	7.1387	5.8427	13.1297	11.1073	4.6088	3.0654	3.4345	14.7942	5.8437	9.0054	10.8067	3.3326	16.8959	12.8044	5.0827	6.2151	2.4944	11.3779	13.8401	15.8976	4.0886	6.1634	10.7947	8.2763	6.417	1.5055	7.2758	5.0215	9.1715	12.4002	7.961	9.2535	13.0662	5.5069	2.2181	4.7035	6.939	7.4155
AC074138.1	1.0555	0.8276	1.3965	1.4159	0.4663	0.7305	0.4423	0.1733	0.4755	0.9798	1.0873	0.1617	0.818	0.5068	0.9998	0.3558	0.1102	0.1579	0.9214	1.1601	0.9025	0.5415	0.2004	0.5205	1.4661	0.4238	0.1331	0.1444	1.2851	0.5749	0.0468	0.0533	0.2868	0.9683	1.4514	0.483	0.2354	0.5868	0.4002	1.6918	1.4527	0.7543	0.9115	1.841	0	0	0.1251	0.4441	0.397
AL035587.1	3.4082	2.4037	2.9309	5.4215	2.6975	2.9547	2.2694	3.6377	2.7215	2.1728	1.793	2.4516	3.656	2.0831	3.4511	3.2281	2.2158	2.5779	3.6261	2.2826	2.2624	0.8997	2.8622	2.8826	3.6109	2.4397	1.5907	2.2734	2.9373	5.0273	3.2744	3.2606	3.4106	5.5643	3.8078	3.1192	1.0291	3.1972	2.5845	4.8452	5.4756	4.0896	0.72	5.5966	14.2782	3.2851	1.9247	4.7155	2.8006
AC020612.3	1.4849	0.4729	1.1492	0.6998	0.246	0.5219	0.8763	0.3962	0.2964	0.72	0.8522	0	0.4155	0.3476	0.4811	0.5083	0.1259	0.361	0.8425	0.3315	0.5501	0.2476	0.4581	0.694	1.368	0.0807	0.5071	0	0.2003	0.5973	0.642	0.1218	0.3933	0.4216	0.8532	0.4247	0	0.4127	0.2815	1.0635	0.229	0.4311	0.1344	0.8684	0.6786	0.4954	0.1715	0.29	0.242
DBH-AS1	1.5333	2.1785	3.4027	6.6206	2.2286	4.2276	4.2395	0.9502	0.7899	8.3563	0.0189	4.9919	3.3218	7.5948	0.6731	0.596	1.2079	2.405	13.8081	2.2967	1.3194	2.4739	2.482	4.4387	1.768	0.9681	0.6216	1.1437	2.0995	3.0881	4.0771	1.0059	2.1661	8.8756	4.1934	1.7428	0.5098	0.8249	1.7253	1.7262	14.6772	1.746	0.197	7.4944	6.5101	1.1882	1.097	0.9661	7.7552
KCTD21-AS1	1.4871	0.2791	1.3108	0.6462	0.2361	0.5749	0.9621	0.1984	0.5072	0.3205	0.3023	0.4783	0.6893	0.8557	0.7831	0.4455	0.4099	0.8587	0.5889	0.3735	0.5338	0.9918	0.1338	0.571	0.9077	0.8287	0.419	0.2687	0.443	3.1558	1.4198	0.6097	0.1477	1.148	0.356	0.7124	0.1497	0.8913	0.5022	2.6508	0.6451	0.7447	1.0518	1.1625	2.4354	0.3721	0.1718	0.6899	0.1742
LINC01638	0.5827	8.6962	0.2863	0.2354	0.2574	0.1404	0.3023	2.1678	1.418	6.9598	0	0.6632	0.3261	3.7409	17.2079	21.5663	0.3388	0.3238	1.4799	3.0475	3.8857	0.111	2.1228	0	0.1534	1.2309	0.1364	2.221	0.2695	67.8831	2.8789	0.8191	1.2935	2.1744	0.6802	0	2.5736	0.2776	0.7574	0.0867	1.2325	2.1265	0.0904	0.1198	0.8116	11.7017	0	4.0322	1.0854
LINC00539	1.7874	0.8824	1.4317	2.2272	0.703	0.9225	0.7825	0.6795	0.6778	1.0764	0.5152	0.4715	1.4388	0.7183	0.7616	0.5499	0.9966	0.9048	1.5745	0.6996	0.889	0.4735	0.8661	1.4648	1.2722	0.5325	0.7492	0.4355	1.0129	0.7092	1.9759	0.7389	0.8475	2.3219	1.6382	0.9299	0.2366	0.9255	0.4177	1.9386	2.5226	1.1259	0.5675	1.0839	1.1637	1.1328	0.7316	0.8226	1.5643
AC009802.1	0.7233	0.7659	0.9047	0.8368	0.4647	1.0353	0.5493	0.5334	0.56	0.9635	0.0755	1.0478	0.6256	0.2052	1.1931	0.3602	0.8475	0.6821	0.8954	1.5853	0.877	0.0877	0.2705	2.2479	2.1565	0.0858	0.7186	0.6433	1.0407	0.127	1.5919	0.5176	0.3716	1.1202	0.6717	0.8124	0.1694	1.0966	0.5235	0.4453	1.6226	0.9468	0.1191	2.1535	0.9616	0.2925	0.2633	0.822	0.4715
AC048341.1	1.9838	1.7056	4.044	1.7266	0.6613	1.4577	3.324	0.8677	0.8422	3.1262	0.9127	1.8344	0.9468	1.694	2.7289	1.4733	0.3798	0.8127	4.0007	1.6845	2.4619	2.1346	0.9411	2.4639	3.9512	1.3022	0.4389	0.368	2.2196	1.5119	2.7711	1.1257	1.1778	3.7873	2.3993	1.047	0.3645	0.9404	0.8121	1.6356	2.4702	1.2663	0.617	4.7613	0.6823	0.8771	0.6523	0.8748	2.1741
CNNM3-DT	8.4127	7.4239	7.8922	1.6822	6.0813	16.9161	7.0368	3.374	1.7642	9.2293	1.9508	9.4793	6.8486	4.4555	9.417	7.1217	8.1284	5.1236	5.8826	14.114	7.9338	8.3306	4.1944	8.5792	10.8977	2.772	9.0544	2.9475	2.2926	1.3127	4.4086	2.3413	1.2605	2.8954	11.7184	8.6326	1.3958	5.6687	1.1599	10.358	8.4929	7.3416	1.2001	8.7165	5.9031	2.7219	7.8527	5.1787	3.0748
UCKL1-AS1	1.7036	0.4491	2.5258	0.6091	0.2984	0.8754	0.7147	0.1129	0.3127	0.519	1.371	0.039	0.411	0.1833	0.2855	0.0804	0.0399	0.1904	0.1667	0.1049	0.4353	0.8619	0.1208	0.5491	0.6386	0.1661	0.0321	0.1567	0.6445	0.6995	0.1862	0.1156	0.4357	0.5838	1.2001	0.2419	0.0284	0.1633	0.1559	0.7956	0.7611	0.2865	1.4784	0.8774	0.2148	0.1045	0.1538	0.1377	0.2106
AC037459.2	0.7694	0.5042	1.6674	0.5802	0.8327	1.2764	0.9641	0.5092	0.4915	0.9285	1.2659	0.1533	0.5598	0.7444	0.6732	0.6322	0.261	0.3991	0.6694	0.4466	0.6271	0.9749	0.4431	0.7193	0.9782	0.3849	0.0631	0.5475	0.4705	0.6934	0.6209	0.3786	0.7066	0.6336	1.0414	0.7042	0.0743	0.7058	0.3938	1.1824	1.5902	0.9828	0.6409	0.9	0	0.3081	0.2489	0.3908	0.3386
AL031963.3	0.6223	0.3172	3.3395	0.4693	0.8797	1.3298	1.4918	0.6377	0.0663	0.3755	0.762	0.8265	0.418	0.6215	0.6453	0.4772	0.3378	1.6946	0.8004	1.3337	1.4756	1.1621	0.512	1.4627	0.8715	0.4331	0.6121	0.8856	0.4925	3.6853	0.7892	1.3064	0.1758	1.3429	0.9536	0.3987	0.2405	0.5535	0.2831	1.6857	0.6143	0.1156	0.3155	0.9407	0	0.5537	0.6901	0.4862	0.568
LINC01436	3.1295	0.1102	0.4167	0.2379	1.0703	0.1703	0.2567	0.9482	8.4372	7.9621	0.0772	0.2681	1.0735	12.4765	1.5047	0.9953	0.2055	12.3042	2.1003	0.2704	0.0748	10.7045	0	1.5099	1.1905	0.3074	0.0552	10.9538	0.9442	177.326	0.0582	1.4569	0.7131	1.8345	0.2062	0.1386	1.5606	0.5051	0.1531	0.1578	0	1.0316	0.0366	0.218	0.3691	1.976	0.7774	1.3409	0.5923
AC139100.2	3.8355	2.7924	3.6282	4.2181	1.5531	2.5163	5.1658	0.3412	0.1702	3.2373	3.6076	3.8202	2.7728	1.7956	7.7676	0.6128	1.5178	1.7614	3.6877	0.7135	2.1315	2.7711	1.0518	4.0123	3.3569	0.9036	4.5409	0.8528	3.3343	2.4688	2.7637	0.7339	0.4516	0.9983	4.8158	1.6089	0.2574	0.6219	0.8483	2.3309	5.3241	1.4104	1.9098	8.2826	0	0.9954	3.0029	0.6243	1.615
AL445205.1	0.3078	0.3362	0.7765	0	1.2693	2.8852	0.2236	0.0438	0.1093	1.8133	0	2.998	1.3209	0.0641	0	0.8993	0	0.9979	0.427	0.2749	0.2281	7.5962	1.5195	0.1096	0.2647	3.1688	0	2.1904	0.8859	0	0.6507	0.3366	0.3624	0.2914	0.6813	0.0939	0	0.4564	2.2955	27.3679	0.823	1.6206	2.9728	0.9233	3.2516	0	0.158	0.0802	0.0335
AC087222.1	18.2625	2.7508	3.4659	2.2755	0.8346	2.0067	2.7446	0.4481	0.2235	1.538	1.7669	0.4181	0.4699	2.0964	3.5369	1.9547	0.5696	0.1361	1.0323	0.3749	0.7777	2.6598	0.3454	3.5882	2.7075	0.7304	0.2294	0.1867	2.7939	1.3511	0.968	0.5508	0.4448	2.0265	4.3957	1.1527	0.0676	0.5835	0.8755	1.9682	2.331	0.8775	1.3683	4.3819	0	1.8677	0.7759	1.3121	2.9424
SNHG16	13.7275	14.467	8.3584	22.8962	9.4186	9.5051	2.5717	15.3003	13.471	10.1667	6.0748	6.5874	13.5887	5.9586	8.1037	17.2534	7.3726	5.1148	5.1332	15.3756	8.4473	8.3919	13.2237	3.54	17.0515	15.2611	7.0052	6.8589	6.804	13.8505	2.4331	18.7613	21.9151	14.4036	9.6908	5.4424	7.2162	11.0412	9.8487	19.644	8.1891	10.3614	6.2925	17.3704	14.9272	12.7931	4.8786	17.9528	7.5546
AL731571.1	3.1185	2.242	4.8942	1.4147	1.059	2.0386	2.4352	0.5575	0.4254	2.9485	0.3356	0.2071	1.0363	1.4721	2.4504	1.7829	0.2512	0.5686	0.9659	0.644	2.8163	4.0425	1.1224	2.2801	2.6576	2.0176	0.1172	0.468	2.0052	2.4966	0.9999	1.4832	1.005	1.6381	3.1159	0.8652	0.3641	0.8343	0.6651	1.0661	2.429	0.5522	0.4023	1.5994	0.1663	1.1619	0.7685	0.5025	0.9213
AP001469.2	3.2553	1.0862	1.1197	1.1507	0.719	1.2204	0.9852	0	0.1444	0.7015	0.3114	0.1801	0.6073	2.3706	2.2854	0.5944	0.3681	0	1.5393	0.2422	0.402	1.6282	0.2232	0.5796	1.3995	1.0619	0	0	1.5613	2.6191	0.3127	0.3559	1.3413	1.8486	2.0783	0.9931	0.3495	0.754	0.2057	0.9892	1.3389	0	0.6876	0.9763	0	0	0.5014	0	0.619
AC008736.1	2.9802	1.8985	3.5879	3.5993	2.7153	1.6759	2.3677	1.829	1.7848	2.2478	13.3266	4.0813	1.8764	2.4415	1.6899	2.5507	3.4117	2.7774	4.7913	3.4928	1.1041	1.8633	4.5968	3.3829	3.0202	3.2405	2.8497	1.9879	3.8191	2.7575	6.2274	3.4213	5.1312	3.5963	1.5221	2.7275	0.8398	2.278	2.4717	10.5757	4.9412	5.2775	3.3725	2.0782	15.8901	1.823	2.1802	3.3471	5.2824
LINC02544	0.6297	0.2292	0.3249	0.8904	0.2782	0.2656	0.1144	0	0.8381	0.3393	0.0602	0.2091	0.0881	0.6879	0.3061	0.8624	0	0.3062	0.9529	1.1247	0.35	0.525	9.843	0.0841	0.116	1.7119	0	0.4201	0.2265	7.6002	2.9948	5.3705	2.669	2.9503	0.3216	0.2161	0.8113	0.2626	0.4775	0	1.4569	0.2925	0.114	0.2833	1.535	2.8015	0.3395	0.738	0.5132
AC010776.3	0	0	0	0	0	0	0	0	0	0	6.0145	0	0.1397	0	0	0	0	0	0.0944	0.2228	0	0	0	0	0.092	0	0	0	0	1.1242	0.4315	0	0	0.1417	0	0	0	0	0	0	1.0776	0	31.7157	0	0	0	0	0	0.0813
ZNF436-AS1	2.4926	3.3125	2.8035	4.0093	1.0137	1.2459	2.644	0.8446	1.685	6.1728	1.6198	3.7567	1.7493	2.5684	2.0256	1.452	0.9931	1.1286	4.52	1.2012	1.7297	3.7732	0.358	1.3315	4.0241	0.9637	0.6918	1.5131	2.5618	3.387	5.8158	0.5451	0.3913	2.067	2.5057	1.6657	0.5479	1.9355	0.69	3.0708	3.344	2.4258	0.2579	3.204	1.2537	0.8449	2.2303	1.6384	0.9802
AL590133.1	0.8625	0.4186	2.1756	1.4905	0.635	0.3233	0.4177	0.3682	0.3061	0.1239	0	0.1909	0.1609	0.5383	0.1863	0.1575	0	0.7455	0.6525	1.0269	0.6391	1.9173	0.7095	0.9214	0.8476	1.0003	0	0.5114	0.5171	0.185	0.8286	0	0.2031	0.8163	2.643	0.5262	0	0.1598	0.327	1.3478	1.951	0.5341	0	1.9659	0	0.7674	0.3542	0	0.2811
LINC01237	0.793	0.89	1.3638	1.1212	0.0876	0.5946	0.456	0.1693	0.387	0.5981	0.0253	0.4388	0.5178	1.1962	0.4711	0.3258	0.3586	0.1285	0.6499	0.7081	0.2448	1.3221	0.2718	0.706	0.7793	0.1437	0.0722	0.2351	0.7844	0.4253	0.3047	0.3902	0.5601	0.7505	0.945	0.4233	0.0638	0.551	0.1503	1.549	0.9784	0.5525	0.0239	0.8086	0	0.294	0.2646	0.2065	0.6247
AC010999.1	1.3061	1.3075	1.5725	1.3851	0	0.5509	0.7116	0.1394	0.5215	1.1259	0.3748	1.3009	0	1.2229	2.5393	0	0.2215	0.2117	0.8647	1.4579	0.7259	0.4355	0.2686	0.6977	1.083	0.284	0	0	0.2349	1.0509	0	1.071	0.2307	0.5563	0.8339	0.5977	0.1052	0.1815	0	1.0206	0	0.1517	0.1182	1.1752	0	1.1621	0.6035	0.5102	0.3193
AL035420.3	0	0.3599	0.4535	0	1.0192	1.112	0.9576	1.2664	1.0527	0.7102	0.3783	1.5319	0.1845	2.263	0.4272	0.1805	1.5651	4.2735	0.7481	0.8829	0.4884	0.2198	0.2711	1.7606	0.3644	0	0.5403	1.7588	0.2371	2.3336	1.3299	0.2162	0.2328	0.9358	0.6733	0.3016	0	0.3664	0	1.3735	0.2033	0.4593	0.1194	0.949	0	0	0.6091	2.0601	0.2149
AC011481.2	1.2417	0.9944	0.3417	0.1171	0.3291	0.9776	1.9844	0.6362	0.1322	1.1774	0.5701	0.6596	1.251	0.155	0.4828	0.5441	1.1794	0.161	0.2818	0	0.9201	0.4969	0	0.796	2.1965	0.216	0.1357	0.6626	0.8934	1.119	1.5747	0	0.5263	0.141	0.3805	0.4546	0.16	0.5522	0.4708	0.1294	0.7661	0.3461	0	1.3407	5.7507	1.1048	0.2295	0.9702	0.4048
ADORA2A-AS1	13.7265	9.1144	13.7586	0.8659	8.0115	11.261	13.6121	1.9161	5.938	16.3227	0.0402	8.8355	8.5784	13.1059	6.0551	2.2571	5.2525	4.2539	1.3205	6.6325	7.7402	7.0538	6.9091	9.3512	16.5003	4.1552	8.8484	2.1475	6.8071	0.2196	1.4675	0.1894	0.4079	0.2087	18.9678	2.414	0.2705	11.5992	4.1098	0.3828	5.3109	5.2786	0.2281	8.7376	1.7912	5.371	3.7755	5.4751	1.5742
AC009065.2	2.2966	0.3344	1.4746	2.1649	0.0676	0.3444	0.5561	0.3268	0.5705	2.1776	0.2343	0.2033	0.4285	1.5291	1.2899	0.1677	0.2077	0.1985	0.2317	0.1367	0.9076	0.919	0.2519	0.4907	1.1849	0.1332	0.1673	0.1362	0.8261	1.7739	0.7943	0.2009	0.2163	1.3911	2.6587	0.4204	0	0.2553	0.2322	0.4785	1.2279	0.64	0.3327	1.047	3.5453	0.2725	0.3301	0.1196	0.5989
AC022126.1	0.9699	0.4753	0.4876	4.2022	0.3131	0.5454	0.1626	0.5893	0.7546	0.4984	0.2284	0.2972	0.4385	0.5356	0.5802	0.5517	0.3796	0.4837	2.5401	0.8661	0.6081	1.0449	0.7672	0.2391	0.4537	0.6652	0.3873	0.4977	0.4563	0.3362	0.3871	0.416	1.0013	0.6567	0.4573	0.3414	0.1922	0.6014	0.3253	0.3498	3.4292	0.5718	0.1216	0.8324	0	0.697	0.5516	0.5829	2.1524
AC007785.1	0.3187	0.348	0	0.4506	0	0	0.4629	0	0.3393	0.5494	0	0.6348	0	0	0	0	0	0.2066	0.2411	0	0.4722	0.2125	0	0	0.1174	0	0	0	0	2.2562	0	0	0.2251	0	0.1628	0	0	0.1771	0	0	0	0	0	0.1147	0	0.8506	0	0	0
AC092910.3	2.2607	1.0257	3.1106	1.6987	0.4053	1.5292	1.9754	0.3637	0.5756	2.0193	2.1813	0.979	0.8435	0.859	1.8261	0.6999	0.6446	0.9559	1.3758	0.4389	0.8497	0.8959	0.7817	2.1177	2.3786	0.8835	0.734	0.7868	1.2022	2.1511	2.9464	0.7308	1.5738	2.3816	2.4599	0.6897	0.2322	0.6739	0.6708	4.0961	2.648	1.2479	0.6882	2.4764	0.3194	0.8163	0.6964	0.6656	0.801
PSMA3-AS1	22.9185	14.9233	26.3961	13.2652	9.5313	18.1394	33.0413	6.0598	2.9114	16.9797	21.373	17.1047	11.0688	12.6477	23.9953	7.2429	5.5798	4.0456	18.101	9.6016	16.9082	17.5317	4.8162	15.2173	28.6894	10.6203	6.6555	4.6863	10.1756	26.8106	10.3138	9.6111	7.6255	15.9745	28.1004	8.1548	3.4032	8.4223	4.9322	20.5295	18.0506	7.8331	9.3233	29.3815	3.4631	10.164	9.2062	7.3411	9.3235
AL121845.4	5.5318	2.8947	16.8876	2.2814	6.4147	10.6932	25.9931	1.3285	0.7362	5.5134	0.6614	5.5097	2.9025	5.1794	5.1534	1.7044	3.2837	4.9313	3.1389	2.7786	5.1237	4.842	1.7065	8.4955	6.2431	2.2556	10.2016	5.2275	3.2336	0.8902	1.3951	0.6804	0.9769	0.3927	6.7102	3.006	0.6681	3.4596	0.5244	0.5403	6.3989	1.7665	0.2504	4.2308	0.8427	0	10.5434	0.2701	0.7889
AP001628.1	1.4849	0.5405	0.7661	0.6998	0	1.2525	2.0223	0.1585	0	1.2799	0.5681	1.2324	1.0388	2.3171	3.368	0	1.0073	0	0.1404	0.663	0.8252	1.7329	0.9161	1.7846	1.368	0.4844	0	0.3302	0.6677	1.9115	1.7119	0	0.2622	1.054	1.5168	0.6795	0.1196	0.4127	0.4222	1.9337	0.9161	0.1724	0.1344	1.8705	0	0.3303	0.2287	0	0.9681
AC108010.1	4.0219	2.5807	7.1283	5.0764	2.1681	3.8333	1.634	1.7462	4.1369	1.9391	2.3995	0	2.9759	2.5955	3.1807	2.5391	0.6012	0.7955	2.5529	2.6784	3.5863	5.4553	1.9067	2.3305	3.9942	2.1347	0.149	1.1519	2.869	0.8775	1.4932	0.6708	5.6338	4.9549	4.352	1.3725	0.5928	2.8421	1.5766	1.9175	4.7101	2.3431	3.0857	3.0913	0	2.1835	0.6089	1.5445	1.9332
DM1-AS	1.6482	2.1375	1.7717	1.1167	1.2287	1.4482	5.2006	0.4398	0.9871	2.4863	3.7444	1.0944	1.0378	0.7716	2.4701	1.0157	0.6989	0.7346	2.0264	0.5519	0.916	1.9236	0.2542	3.6319	2.5435	1.2545	1.5198	1.5576	1.334	2.586	1.5439	1.4867	1.1643	1.9305	3.7882	1.0842	0.0995	0.859	0.703	2.2538	2.2244	1.1962	0.6342	4.2638	0.2511	1.1915	1.8722	0.9658	0.5709
AC061961.1	2.8416	2.7874	3.3027	0.0775	0.7201	1.1438	1.271	1.8581	0.8837	5.9945	0	1.7478	1.649	1.3069	5.6117	0.9912	0.7001	0.7466	0.2376	0.8013	0.9641	2.284	0.5413	1.4859	5.1366	0.2407	0.6211	1.0774	0.2313	0.0385	0.0948	0.1668	0.0951	0.603	4.4991	1.9778	0.0434	1.0974	0.2552	2.2826	0.2122	0.6738	0	3.4665	0.164	1.1843	0.5114	0.7362	0.3461
AL512598.1	2.3252	2.116	0	1.2786	0.1712	0.4358	0.8445	1.4891	0.8252	3.5075	0	3.3452	0.6507	0.4838	2.0091	1.9105	0.7887	0.7537	0.5864	3.4605	0.5743	0.5169	0	0.621	1.9994	0.3371	0.4235	1.7233	0.4182	17.2114	6.7017	2.7965	0.8212	2.6408	1.9793	0	0.7489	0.4309	0.2939	1.4131	1.1954	1.44	0.421	2.5106	12.752	4.8273	0.2387	1.5139	1.0106
AL355001.2	4.8856	3.9126	11.1833	4.0611	2.8253	6.244	3.4198	5.2715	4.8234	6.9678	19.4067	11.3247	6.7614	6.4319	5.1234	8.4664	7.7738	8.984	2.8899	4.6007	6.0556	8.1752	10.0113	7.0702	5.8596	8.6157	7.3778	5.9254	5.2405	2.7445	6.4007	11.8295	3.0746	8.8277	5.5804	5.5282	1.0013	4.7406	4.5468	21.0538	8.2203	6.3541	4.3748	8.3763	6.7121	8.2197	3.4477	6.9404	6.2546
VPS9D1-AS1	0.9053	1.1644	2.5327	2.9298	0.1066	0.5091	5.0853	0.0515	0.0964	1.3266	1.1546	0.6412	0.6418	3.2774	2.112	0.3636	0.0819	0.3521	2.7624	1.1317	1.6099	1.7709	0.2482	1.7409	1.9572	0.3937	0.2308	0.161	1.6065	16.2377	4.0704	0.0396	12.1497	6.1347	2.3735	0.5523	0.0389	0.1342	0.2975	3.3953	3.1648	0.1121	0.153	2.5414	0.0736	0.2685	0.9109	0.2358	1.8493
AC131953.1	2.218	0.5652	0.9155	0.6272	0	0.2494	0.1611	0.1894	0.1181	1.0515	0.594	0.1473	0.4965	0.6922	1.5811	0.243	0	0.2876	0.2517	0.3961	1.3148	0.7396	0	0.5924	0.3269	0.3859	0	0	0.2394	2.1414	0.7671	0.291	0.47	1.0076	0.2266	0.5075	0.1429	0.3699	0.0841	0	0.1368	0.3091	0.4819	0.3193	0	0	0.0683	0.5199	0.0723
FOXD2-AS1	10.2465	3.5918	5.1636	12.6797	2.2725	5.9991	2.8638	5.3647	2.9406	14.2843	0.5647	6.6357	2.1712	6.9485	10.0015	5.6357	3.4041	2.8431	4.1951	2.3345	5.874	7.7895	2.8791	4.7527	5.159	4.475	1.7741	3.5253	2.5634	18.836	7.8997	7.4964	4.0508	6.3934	2.4336	2.9136	3.7347	4.8991	1.7906	3.4046	5.489	1.4102	0.5955	5.2054	4.214	5.1774	4.3382	4.217	3.2577
MUC20-OT1	11.9749	8.5628	6.7121	9.5456	1.8217	4.3101	8.146	1.0908	1.8017	10.7134	16.7858	5.6002	5.7499	7.681	9.5564	7.8567	1.4355	3.4024	5.4236	1.3313	7.5903	7.2845	0.8605	6.949	18.8945	2.7166	3.8826	1.08	3.1529	2.8285	1.4624	0.9465	2.1444	13.7301	11.6028	6.9377	1.514	3.8866	3.1522	2.8152	8.8897	1.6	11.0675	8.6241	3.2676	2.1395	5.7626	1.4184	2.3829
LINC01410	0.5389	0.5978	0.5825	1.5843	0.3401	0.4473	0.6244	0.3287	0.4644	0.564	1.2076	0.4941	0.7181	0.3043	0.9811	0.4638	0.2785	0.5323	1.359	0.4583	0.1711	0.0685	0.2955	1.1925	0.6241	0.5022	0.3085	0.3423	0.6831	4.0135	1.3017	0.3872	0.9063	1.6174	0.8912	0.7045	0.2975	0.4422	0.2821	0.548	1.4881	0.4768	0.223	0.6742	0	0.8219	0.2608	0.842	1.1961
AL589765.4	0.8309	1.2098	2.0959	1.8275	0.367	0.9344	0.3018	0.473	1.7692	0.8356	0.3179	2.7585	1.395	1.5559	1.4359	0.7585	2.2546	2.3342	1.1524	0.2473	1.2313	0.5541	2.5062	3.9944	0.9186	1.2046	2.1186	0.739	0.8966	1.4261	1.2772	3.0887	1.1738	1.8873	1.6974	1.5208	0.1784	0.6158	0.42	2.8853	1.8795	1.5437	0.4012	0.299	1.0126	1.4785	1.5356	2.813	1.1737
AL356740.1	0.2447	0.2375	0.2806	0.0384	0.036	0.0917	0.1185	0.0348	0	0.3164	26.5905	0.1083	0.1826	0.1018	0.4229	0.4468	0	0.0529	0.1234	0.1457	0	0.0544	0.6039	0	0.3607	0.0355	0.0891	0.0725	0.2347	0.0525	0	0.9097	0.0576	0.1853	0.0417	0.0373	0.0263	0.2267	0	0	0.0503	0.1894	3.072	0.411	0.4971	0.8709	0.0754	0.1275	0.2659
LINC00623	4.5167	2.8884	3.7791	7.096	3.5231	2.2653	3.8425	5.2465	12.477	6.6116	3.4718	7.7003	3.7349	3.7844	3.2171	6.2631	4.2787	4.4319	5.6953	1.7441	1.6583	1.0312	3.2805	4.8037	3.4939	4.513	16.6756	6.4057	3.674	7.8574	4.1517	6.6467	4.4839	4.8525	2.099	4.3199	1.0746	4.0264	2.9468	1.6533	4.9203	3.3265	1.1051	3.0022	4.3144	2.6791	4.224	5.0232	2.7855
AL117335.1	11.6528	5.9912	2.7628	2.079	5.3221	2.0362	2.7736	7.9824	6.1682	10.2431	0.1008	6.2074	7.3324	7.5201	22.4843	6.3108	6.9673	4.4816	16.0632	4.4679	5.3661	1.0976	12.0232	6.1543	10.9174	0.4295	5.5039	7.202	10.9175	1.1441	1.6698	1.1229	2.3717	5.9443	7.9354	6.206	2.7564	2.6351	7.114	1.0288	8.7323	2.324	0	14.3352	4.4931	3.2803	2.8999	8.6929	1.8885
AL512306.2	2.1932	0.6248	1.4104	0.7865	0.7372	0.4558	4.5368	0.0814	0.0254	2.0549	0.8391	1.8995	1.2541	0.6547	1.8539	0.1306	0.1294	0.3091	2.8496	0.8089	1.4131	1.3036	0.1569	0.9933	2.3544	0.3525	0.2866	0.1696	0.6517	0.2148	1.2917	0.4379	0.3031	0.5144	1.6559	0.4363	0.0461	0.0795	0.2531	0.3974	1.9413	0.6644	0.5698	2.6254	0.4067	0.3818	0.8224	0.447	0.4041
BHLHE40-AS1	3.1737	2.1096	2.875	8.817	1.2017	1.3856	1.0023	0.9426	0.9025	0.6457	0.5053	0.6414	7.2374	1.6611	1.3669	0.8206	2.0862	1.8659	6.2116	1.0914	1.3	1.1569	1.4108	2.8747	1.2131	0.6945	1.9173	0.3857	1.0636	1.9159	3.2498	2.4958	2.9102	3.5261	2.0841	2.1469	1.3269	1.4246	1.1136	0.2978	7.2602	1.2178	0.3498	0.7024	0.5766	0.9822	2.3195	0.9395	1.9663
AL137244.1	0.4892	0.4897	0.4207	0.6341	0	0.3439	1.1994	0.1567	0.0651	1.3178	2.059	0.6497	0.0685	0.9925	0.6341	0.201	0.1659	0.3172	0.5089	0.2184	1.2688	0.4894	0.4025	1.372	0.4958	0.4256	0	0.2176	0.7479	0.5511	0.2115	0.4012	0.1728	0.5556	1.062	0.3358	0	0.068	0.6029	1.1468	0.5282	0.5113	0.1329	0.7924	0	0.1088	0.4521	0.4778	0.5183
AC005332.2	1.4498	0.8444	0.6234	0.5808	0.1441	0.5707	0.3686	0.4642	0.328	1.7339	0.1248	0.0963	0.5883	0.3167	1.0335	0.3971	0.2213	0.329	0.9872	0.4207	0.752	1.0877	0.2385	0.484	1.2021	0.4887	0.2971	0.1934	0.6258	0.1166	0.773	0.3329	0.8449	0.4322	1.1477	0.6468	0.2451	0.4836	0.1924	0.5098	1.6323	0.6229	0.2756	1.0044	0	0.1935	0.3461	0.7363	0.6026
LINC02416	0.3918	0.4279	0.1348	1.9392	0.0865	0	0.5693	0.3346	0	0.1689	0.2249	0.1301	3.0702	0.2446	0.2539	0	1.1962	1.9053	2.2234	0	0.871	0	0	0.7326	0.0722	0.0852	0.7494	0	0.4933	0.2522	1.807	0.1285	1.1071	5.1178	0.2001	0.1793	0	0.3267	0.4457	0	1.813	0.182	0	0.2115	0	0	0.181	0.1531	2.0437
AL354696.1	1.0644	1.4723	3.0753	1.9063	1.5986	2.5138	2.0874	1.6359	0.2266	3.3028	4.9682	3.3923	1.6679	1.3287	1.6554	1.5158	0.8665	1.7941	2.0131	1.7108	1.4196	2.2714	2.2765	2.6153	2.5887	1.3888	2.0937	1.8933	2.0675	1.3702	1.2271	0.9775	0.9022	0.7253	2.6093	1.3637	0.4799	1.775	0.565	2.2177	1.7072	2.2741	2.2355	2.0686	3.8915	0	0.918	0.9979	1.3878
AL033527.3	1.6379	1.1483	1.3772	1.4296	0.7503	0.6481	0.2644	0.777	3.1002	1.3596	0	3.1418	0.0679	4.2409	9.1993	4.5856	0.1235	0.7079	1.2162	0.7584	0.6743	4.3288	0.7985	0.9073	0.3353	0.8971	1.8231	0.4316	0.8947	2.538	2.9374	0.0796	0.4714	3.2726	0.9605	0.2776	0.0391	1.821	0.253	0	1.3847	1.1834	0	1.8558	0	0.9176	0.299	1.5167	1.0678
AC110285.6	1.4464	0.0752	1.3268	0.6493	0.426	1.007	0.4503	0.5587	0.5133	0.2672	0.4217	0.7318	0.7324	0.258	0.5356	1.5091	0.2804	0.8484	0.2866	0.5536	1.2249	0.9646	1.5299	1.5085	0.4061	1.3781	0.828	0.5513	1.0654	5.5861	0.3573	2.6659	0.3406	0.704	1.2313	1.4499	0.0444	0.4978	0.6529	0.4305	0.6374	0.6079	0.3741	0.6197	0.0839	1.5934	0.5941	0.6458	0.9879
AC012073.1	1.1458	1.1818	1.5765	3.0603	1.181	1.0739	1.5259	0.6522	0.9149	2.3869	0.6941	1.8386	0.5344	0.7152	0.6188	0.0523	0.2591	0.619	0.7585	0.8526	0.4245	1.2736	1.3353	1.5302	1.1612	0.8306	0.4174	1.2738	1.4426	6.7606	1.9815	1.0022	1.3489	1.6809	1.1704	1.2234	0.246	1.2739	1.5205	1.5916	1.3549	1.8184	0.6224	0.8591	1.0473	1.1044	0.7059	1.2682	0.996
AL035461.2	1.2114	0.6615	1.1112	1.3322	1.427	1.5895	1.8332	0.7758	0.7524	1.0442	1.236	3.3516	0.791	1.8904	0.7851	0.6636	0.6849	0.7854	1.833	0.7212	0.2992	0.5386	1.4948	2.2649	0.8184	0.4391	2.2064	0.5387	1.5252	5.978	2.9096	1.0596	0.4279	1.2612	1.0312	0.5543	0.2601	0.8979	0.689	1.5776	1.7438	1.4067	0.658	1.6713	17.7165	0.7186	1.9902	0.9465	2.0403
AC004232.2	2.0152	1.6872	1.9409	1.4247	1.7804	2.1531	1.0247	0.9464	2.3601	2.345	3.007	2.5423	0.5639	1.1321	2.7425	2.8699	0.6835	2.0903	1.4484	1.7995	2.2398	2.5534	0.8289	3.0141	1.3367	0.7012	1.2112	0.3585	1.0149	0.6485	1.7424	1.4542	0.9964	2.9753	2.3672	2.3976	0.1947	2.0164	0.5348	1.0497	2.8594	2.0592	0.3649	1.5956	4.4207	0.8965	1.3656	1.1021	1.5766
AC104564.3	4.5504	1.4908	5.9479	7.292	1.0051	1.4074	5.0406	0.68	1.3323	5.4913	2.0022	0.6043	1.2734	2.5563	2.8015	0.8724	0.6174	1.0325	3.2705	0.6095	2.866	3.0346	0	5.9552	6.959	0.6927	0.2486	0.2024	3.9285	4.2469	2.3607	0.597	0.3214	3.4884	7.6694	1.2494	0.1466	0.7589	0.1725	2.3703	4.4916	1.3738	0.3296	6.9603	0	0.2024	1.3316	0.1778	3.0408
Z69706.1	5.4155	2.605	3.8587	2.279	1.7088	5.0031	9.413	0.578	1.2355	4.9182	3.0341	6.2928	1.9485	3.3803	3.1335	1.6951	0.5248	1.2539	2.6339	1.0363	1.5765	1.4188	0.7955	3.4094	2.7085	1.1777	3.0648	1.0321	1.3915	1.1204	3.9022	2.2839	0.5465	0.659	3.1611	1.5046	0.3738	1.7203	0.5133	1.5112	3.2217	2.5154	1.0506	11.4858	14.143	2.065	2.9193	1.8134	2.2697
VIM-AS1	6.8494	4.7564	6.7781	6.3572	4.0964	4.7108	5.4345	3.869	2.4963	4.2009	0.0605	7.1368	3.1257	2.927	4.1998	6.3203	4.3249	3.9282	4.0858	4.5637	3.9431	3.338	1.647	5.3193	4.3492	2.4978	5.2684	3.7019	4.018	4.6461	4.1305	8.6409	4.2799	3.4707	5.0859	3.3754	2.0023	3.3976	2.2573	4.0619	8.0286	4.503	0.2862	3.6598	1.9906	4.0784	2.3695	3.4579	2.8682
AC005790.1	0	0.1712	0.1617	0.2216	0.1039	0.2644	0.6831	0.4015	0.8761	0.9119	0	1.8733	0.1316	1.0272	0	0.2576	0.1595	0.4573	0.6226	0.2099	0.3484	0.3136	0	2.7629	0.6931	0.2045	1.927	0.2091	0.2537	1.2106	0.5421	1.6965	0	0.534	0.4803	0.2152	0	1.0456	0	0.2449	0.145	0.4368	0.1703	0.2538	5.1575	0.2092	0.869	0.5511	0.2299
AC105020.6	1.3909	1.1392	2.751	0.7375	0.9217	1.6132	1.4208	0.4083	0.6479	1.2739	0.7983	1.6162	1.0704	1.4108	1.9718	0.6666	0.5308	1.0145	1.3154	0.7763	1.0951	0.6377	0.3576	1.0681	1.826	1.0209	0.475	0.6185	0.6567	1.231	2.3051	0.5703	0.6141	0.9873	1.5096	0.5171	0.084	1.2082	0.2966	1.2227	0.6972	1.171	0.3778	1.846	1.4833	0.4641	0.6962	0.8151	0.6801
POT1-AS1	8.4077	6.9399	13.0396	33.825	22.6348	7.434	2.2255	34.8667	29.5308	16.2083	0.1129	15.5237	3.2437	20.7733	4.4569	15.2098	17.0029	12.9656	5.2776	22.0184	16.9957	9.8656	10.1675	3.5522	27.0991	6.7977	29.7776	56.8811	18.4427	0.1741	1.9415	1.7216	40.4655	0.5759	24.3241	12.3774	2.8464	13.311	18.7398	0.0864	2.8741	5.581	0.1825	35.3631	0.7266	16.8917	6.7415	28.6481	3.4559
AC004112.1	1.4964	0.7626	1.4413	0.7758	1.6526	2.272	0.3261	1.3416	0.7169	0.3225	0.5725	0.2981	2.4288	0.467	0.7758	1.5574	1.3197	0.6791	0.5095	1.7371	0.3326	1.0977	1.231	0.9592	1.8198	0.5207	0	3.8596	1.3996	0.0963	0.9489	0.8835	2.2197	0.6798	2.0636	1.7804	0.2892	2.9115	1.7021	2.1826	3.9697	1.4596	0.4877	0.3231	0	0.932	0.3227	2.3383	0.7805
AC005005.3	0.6753	0.4097	0.8259	0.3536	0.464	0.5485	0.8993	0.2242	0.2796	0.4851	1.1483	0.7971	0.4199	0.6557	1.1184	0.3288	0.5599	0.8756	0.5393	0.268	0.1668	0.5004	0.3086	0.8016	0.9954	0.4569	0.533	0	0.1889	2.125	0.692	0.8368	0.265	0.6391	1.2646	0.618	0.0967	0.0834	0.0853	2.5405	0.6481	0.6622	0.1359	0.7561	2.5604	0.3338	0.8552	0.2931	0.5136
AC002470.1	1.0714	0.585	4.6065	1.3886	0.7099	0.7531	2.3347	0.4574	0.4277	1.0389	6.6611	2.6677	1.7988	2.1734	1.9093	1.9072	2.7255	2.431	1.1145	0	0.5954	0.3572	0.2203	0.7154	1.974	1.6309	0.8781	1.9057	0.8671	5.3444	2.0071	0.5271	0.7568	2.7378	1.368	2.0836	0.0863	0.5956	0.4062	9.3478	1.4871	1.7417	1.1639	2.3135	3.2642	0	2.5576	1.8834	1.4843
TRG-AS1	2.6107	1.3242	1.1483	6.3473	0.8445	0.9065	1.5285	1.0598	1.7087	1.531	0.1146	0.7673	1.7885	0.7925	1.47	0.6017	1.9259	1.4983	4.7436	1.0446	0.888	0.5994	0.6337	0.9297	1.4142	1.4581	1.6214	0.7867	1.8372	0.8172	3.717	0.4305	3.0836	3.6212	1.7924	1.6255	0.4135	1.4513	1.0493	0.5796	4.5326	1.5506	0.1498	1.7046	0.8867	1.6501	1.248	1.3598	3.8784
AL732292.2	0.4921	0.3582	1.0156	0.8117	1.0869	0.8301	1.0723	1.1555	0.262	1.6966	0.4707	2.2872	0.9639	0.4607	1.1161	1.4825	0.6676	0.638	0.3723	0.8788	0.3646	0.4922	0	0.3943	0.3627	0.7491	2.9577	0	0.8851	0.1584	0.9928	1.4526	0.5214	0.2794	0.1257	0.5629	0.1585	0.5471	0.653	1.1535	0.6072	1.1428	0.6237	0.9741	3.8981	2.1891	0.5305	0.3845	0.3208
AC118345.1	0	0.1052	0	0	0	0	0	0	0	0	72.4414	0	0	0	0	0	0	0	0	0.7744	0	0	0	0	0	0	0	0	0	0	0	0	0	0	0	0	0	0	0	0	0	0	17.8998	0	0	0	0	0	0
AL359644.1	1.5686	0.5076	0.7994	0.9858	0.5646	0.5881	0.2532	0.1984	0.2165	0.651	0.489	0.4243	0.8454	1.9583	1.4684	0.8274	0.5518	0.6027	0.6593	0.7263	0.5596	0.4262	0.4779	0.7138	0.8778	0.1769	0.5079	0.2584	0.3762	0.7479	0.8038	0.1525	0	1.2537	1.1869	0.4254	0.0374	0.3553	0.1983	1.0895	0.9677	0.7286	0.3156	0.2927	0	0.5686	0.2684	0.5901	0.1894
PLS3-AS1	0.4079	0.1856	0.3508	0.3605	0.045	0.1434	0.1111	0.6966	0.19	0.3076	1.5216	0.8802	0.5993	0.0637	0.1652	0.5586	0.2421	0.0661	0.27	0.5463	0.1511	0.374	0.2097	0.1362	0.7704	0.1109	0.1672	0.2267	0.2384	6.2026	0	0.3679	0.2881	0.5501	0.0521	0.1167	0.2135	0.4818	0.0387	4.037	0.0944	0.0474	0.24	0.6239	0.3107	0.4536	0.1099	0.239	0.0665
LINC02449	0.9915	0.9775	1.421	0.8762	0.1642	0.6272	0.8852	0.6173	1.0336	0.73	1.6596	0.2194	0.6243	0.4899	0.8299	0.4299	0.0561	0.1607	0.6251	0.7009	0.3979	1.0469	0.2039	0.8165	0.5937	0.3953	0.2257	0.2572	0.3418	3.4301	1.0478	0.5149	1.0505	3.2608	0.6541	0.189	0	0.2296	0.3602	1.9582	1.2488	0.6716	0.1945	0.8772	0	0.1103	0.1273	0.2582	0.5925
PSORS1C3	13.0239	145.734	53.6362	171.035	14.5015	18.3596	17.3008	8.1501	9.4975	203.611	1.0922	153.054	35.0478	36.8607	40.0042	28.3402	45.3872	6.1303	5.1292	13.0637	58.6959	39.7395	4.8433	8.863	227.942	29.5645	5.9466	20.6279	30.8694	1.378	15.4264	20.9499	14.7447	29.5834	52.4856	36.9831	9.3659	13.29	9.4701	2.9739	103.022	74.5818	5.1685	33.8392	9.7844	96.0366	16.4868	10.7332	55.2495
AC009113.1	8.5313	5.8012	10.4572	1.2451	1.6643	7.1109	3.4288	3.5499	3.7808	9.8735	10.6706	5.2047	6.4229	4.8656	6.3146	7.3061	3.4961	4.8291	3.8498	3.9057	7.2842	5.314	4.1326	4.5109	12.2085	5.1232	2.8632	2.8887	2.5236	8.5296	7.0896	6.9034	2.5084	6.3448	10.5283	4.5381	0.9066	5.4408	1.7569	13.1289	7.1868	5.2098	3.4344	10.0219	2.4278	3.8146	4.4955	2.6392	2.5834
AC010487.2	0	1.894	2.3863	1.6349	0	1.9506	1.8897	0.7405	1.8466	4.485	0	0	0	2.1652	1.124	0	0	0	0	0	6.4257	1.1566	0	1.8529	1.9174	0.7543	0	4.6276	3.1194	0	0	1.1378	1.2251	0	5.3149	0	0	1.9283	1.3152	0	4.2799	0	0	2.4969	0	0	0.5342	0	0.5654
AC020916.1	7.0368	2.8466	5.9682	4.793	5.3019	3.7322	10.9087	1.2923	3.2522	3.0998	1.3579	4.6687	1.5511	2.2118	16.7509	3.0483	1.0022	0.3133	9.0089	2.5938	3.9425	17.7861	0.3107	4.5599	3.5162	1.8697	1.4476	0.4791	2.5473	4.4006	2.049	1.778	1.3025	2.6146	7.2419	2.5796	5.3716	0.6731	0.8634	1.6606	2.8028	1.4859	1.1223	9.8346	17.5038	1.0526	12.3006	0.6726	1.6439
AC074117.1	4.0929	2.2913	4.245	6.9857	1.7259	3.2606	3.2996	2.0519	2.8061	4.3967	2.9185	1.853	2.5337	4.4128	4.6016	2.3608	1.6408	1.9298	3.0849	1.3844	2.2057	4.5906	2.5253	6.1781	4.3992	1.7128	0.6608	0.9101	3.0896	6.1471	2.9134	2.0951	3.2635	5.8987	5.2261	2.7952	0.8089	1.7754	1.1051	6.5738	5.0884	2.6212	1.3474	5.3344	0.3023	1.9864	1.7001	2.9071	2.6078
MAGI2-AS3	6.0921	2.4992	4.3466	0.8833	1.4717	5.7877	2.1305	3.4645	3.829	4.0718	8.5587	1.0863	1.7747	0.7241	2.5176	7.8537	1.9171	2.9043	3.9249	5.7322	6.1849	3.0114	3.4504	6.5784	2.5936	2.7946	1.9635	1.5556	1.5623	15.2064	2.8567	4.8161	5.4379	3.3176	1.3977	5.4231	1.3393	3.6479	1.9309	10.9148	2.3343	6.5326	5.1986	3.9248	1.1238	6.9714	2.496	2.3985	1.7473
HPN-AS1	3.2229	3.21	3.0641	0.0422	0.5042	1.095	2.4224	0.1433	0.5838	1.4083	2.0124	0.4458	1.0647	2.2492	2.0596	0.7478	0.4707	0.2322	0.7027	0.5396	1.9238	5.0599	0.4603	1.6857	4.4456	0.6327	0.2079	0.1792	3.3009	0.0432	0.3612	0.2056	0.9328	0.4067	3.6694	1.3724	0.1153	0.5101	1.1201	2.9613	1.9193	0.6861	0.3647	3.3107	0.1091	0.1394	0.3723	0.4197	0.9558
AC040160.1	2.806	2.2874	1.6041	1.6764	1.449	1.4445	1.8373	1.991	3.0506	3.6451	0.1361	1.8894	0.9732	2.8615	2.7917	1.4504	0.4558	0.6405	0.882	2.4703	0.9664	2.1348	1.0729	1.2878	3.0147	1.0313	0.8206	1.1599	0.8672	1.9587	1.9136	1.5296	0.7537	1.8852	1.2716	1.3744	0.6491	1.3182	1.0639	0.2265	0.8777	1.1014	0.2147	2.4038	0.5298	1.723	1.0226	1.5439	0.6828
AC004471.1	1.9996	0.397	1.1255	0.7711	0.6424	1.1244	0.8583	0.5433	0.1935	1.3319	0.2087	1.207	0.407	0.5673	1.5315	0.7966	0.37	0.7071	0.6189	0.487	1.0776	1.0911	0.4486	1.4565	0.7369	0.2372	0.7946	0	0.6539	4.0952	0.5239	1.0733	0.3852	1.2387	1.0213	0.915	0	0.2021	0.0689	0.4735	0.6729	0.4222	0.5266	0.2617	0	0	0.504	0.2841	0.3555
AC004918.1	4.6715	2.3507	5.5769	0.7123	2.3064	3.1678	2.0959	0.2346	0.2926	3.4938	0.5257	0.8211	1.0766	1.2864	2.137	0.6773	1.8642	1.2471	0.9875	0.9815	1.7308	4.0317	1.6954	1.0275	3.1392	0.8964	0.4505	1.4664	1.7299	1.3266	0.792	1.7126	0.4853	2.1847	3.7193	1.6976	0.5753	1.0693	0.8856	1.0736	3.3906	2.5528	0.5473	2.9176	0	0.3667	0.8888	0.7515	0.5823
AC114956.2	0.8025	0.426	0.8971	0.4728	0.2807	0.4889	0.2307	0.3854	0.2136	0.7494	0.8316	0.0888	0.4491	0.2922	0.2817	0.348	0.1361	0.2601	0.2024	0.6569	0.446	0.3791	0.3026	0.3036	0.5668	0.4072	0.0548	0.0595	0.4571	1.7649	0.559	0.1755	0.5432	0.7026	0.666	0.2907	0.0215	0.2231	0.1902	0.7838	0.557	0.3417	0.2301	0.361	0	0.238	0.206	0.2874	0.2725
AL590764.1	2.3787	1.1133	1.013	4.8049	1.251	0.8918	0.6582	1.886	1.8693	1.2693	0	4.0615	3.677	1.0606	2.349	0.3723	2.1516	3.4515	3.7279	1.3149	1.9305	0.6043	0.9318	1.4522	1.5445	1.8229	3.6517	2.1156	2.0781	1.6769	2.9383	0.4458	4.2407	2.7659	1.967	1.555	0.4013	1.5113	1.5891	0.8261	4.4025	3.0516	0.2051	1.9569	8.559	2.1165	2.1982	1.6815	2.917
AC008764.2	16.0383	13.1103	12.9693	9.5485	6.712	20.8858	6.9491	8.6492	8.9872	14.6736	28.5289	1.4946	9.9211	9.4841	6.1998	8.9392	3.4359	4.3781	5.0026	14.3217	7.2973	5.4418	9.0274	7.6654	17.4199	10.28	1.845	7.5076	8.7046	13.4021	5.0281	5.1684	7.9502	10.2261	13.9398	10.8156	0.725	15.6418	9.4948	11.1392	13.8871	19.3428	14.7745	18.9373	0	2.7539	3.2069	5.2762	5.9619
ALOX12-AS1	2.8439	1.5171	2.2601	2.1261	1.2346	1.4522	1.9708	0.8164	1.0441	2.7332	1.432	1.4434	1.5093	1.6629	2.4573	1.334	0.5987	1.1444	1.4406	1.0362	1.7561	3.6951	0.8336	1.4318	2.4996	1.0876	0.9288	0.9303	1.8696	3.6295	1.5263	0.7291	1.1545	1.5871	3.2139	1.1892	0.3474	1.3629	0.6445	2.7414	2.7326	0.9793	0.8701	2.5118	0.4382	0.8871	0.8357	1.0216	1.1242
AC007566.1	3.6257	1.9628	5.2956	2.4012	1.462	2.4362	6.2803	1.1987	0.5048	4.8162	0.377	1.7037	2.0709	3.1104	4.7114	0.9166	1.1352	1.3139	2.0819	2.0422	3.5546	5.8775	0.8719	2.7115	5.6323	0.6712	1.0566	0.8599	3.6118	2.0106	3.4191	0.9026	1.8125	2.608	4.6817	1.3699	0.521	1.4677	0.8389	1.7918	4.1295	1.3905	0.2424	5.2197	0.0453	1.6709	1.575	0.8426	0.9455
AL354892.3	2.077	1.4649	1.5628	0.9177	0.2007	1.168	1.7209	0.194	0.2419	2.0141	2.5579	0.2586	0.6902	0.9723	1.6404	0.4622	0.2202	0.2525	1.4486	0.9853	0.8657	1.3851	0.8009	0.7628	2.1288	0.8187	0.2128	0	1.3542	0.5431	0.9354	0.5535	0.5043	1.3269	1.1603	0.7128	0.1672	0.5773	0.3445	1.1833	1.8019	0.603	0.7991	2.2426	0.1582	0.5197	0.6798	0.5071	1.3753
AC129507.3	7.4162	5.3992	6.6167	0.4915	1.9964	7.7543	3.7457	1.9294	0.8019	3.7956	13.6555	4.6166	3.6967	6.0034	3.0038	1.0156	1.6508	0.8264	0.8329	3.2077	3.778	5.1777	0.8579	3.095	7.6438	1.26	2.2161	3.5041	0.9587	0.0746	2.6719	2.0525	0.2456	1.1187	7.0429	2.2801	0.6344	3.2209	0.703	10.865	3.217	4.0906	0.9651	4.7961	0.1412	2.062	2.6057	1.358	1.171
AL136368.1	4.749	2.497	3.4486	1.3678	0.5827	1.1869	1.5331	1.6896	2.809	1.7056	0.7066	0.3504	1.0336	0.494	1.1968	2.1677	0.179	0.6842	1.9961	1.8847	1.173	1.0557	1.0852	1.2684	3.889	1.2623	0.5766	0.4693	1.4236	0.5095	2.1292	0.6923	1.4909	2.9964	2.2907	0.7244	0	1.0267	0.7002	3.5732	3.9064	1.4706	0.3822	2.8487	3.8585	1.4085	0.4876	1.4429	3.4401
AC013468.1	1.7692	0.4508	1.0954	0.7505	0.4689	0.3979	1.2208	0.3021	0.2825	0.9912	0.1354	0.9398	0.8911	0.5522	1.7198	0.7753	0.3601	0.8029	0.87	0.316	0.6555	0.8259	0.2911	2.4571	0.9779	0.5386	0	0	0.891	0.1139	2.7535	0.5803	0.125	1.0047	0.8132	1.1334	0.114	0.1967	0.2012	1.198	0.764	0.3287	0.1281	0.8278	0	1.1019	0.545	0.1382	0.346
AC005332.3	20.163	19.6875	22.8467	14.8698	17.814	23.4771	19.3846	8.9121	12.6278	24.3322	16.609	28.1939	13.409	14.2143	22.2904	11.5642	9.8164	9.8424	15.6136	15.6748	16.1708	9.0172	15.0259	33.072	21.7665	14.6505	17.4982	19.1987	22.4418	8.245	16.9557	17.5844	9.5509	18.1852	17.4462	14.7626	7.9454	22.2857	12.0518	20.6353	17.7076	21.7058	7.6452	18.9532	15.033	12.4524	16.4406	21.8696	16.0838
AC004381.1	0.6028	0.4389	0.4147	0.8524	0.6658	0.5085	0.2189	0.6434	0.8023	1.0393	0.9226	0	0.6748	0.1881	0.1953	0.1651	0.2045	0.1954	0.3421	0	0.4467	2.4121	0.248	0	0.1111	0.2622	0.4941	0.2681	0.4337	0	0	0.1977	0.6387	0.5135	0.7697	0.5517	0	0.3351	0.1143	0.157	0.3719	0.7	0.2183	0.5424	0	0.2682	0.3714	0	0.393
AC013403.2	1.7633	1.043	1.8196	1.5583	1.85	3.5944	3.6824	0.941	0.4693	3.2298	1.3493	1.4635	2.4672	1.9261	2.5711	1.5695	0.8972	0.8574	1.7509	0.3936	0.3266	0.735	1.8132	4.1208	1.5433	1.2462	0.843	0.9802	1.5857	4.6817	2.414	2.1689	0.3114	1.7523	4.2777	1.7146	0.8518	1.3478	0.5014	2.2962	2.1756	1.8428	0.6385	3.7284	0.2686	0.5883	2.1047	0.3444	1.437
AC010271.1	0.7584	0.3451	0.6522	0.983	0.1675	0.7463	1.1706	0.2428	0.9084	0.2451	0.7254	0.3777	0.4245	0.355	0.983	0.1039	0.3859	0.3688	0.2869	0.5079	0.8429	1.3909	0.156	0.8102	0.2096	0.9896	0	0	0.8866	1.0983	0.5465	0.2488	0.1339	0.323	2.4209	0.347	0	0	0.5032	1.9753	0.5848	0.1761	0.0687	1.0918	0	0	0.9928	0.1481	0.7417
AL353751.1	0.4733	0.4855	0.7104	0.0203	0.2281	0.3387	0.8594	0.2021	0.0916	1.1311	0.3128	0.3142	0.1686	1.6919	0.7807	0.4478	0	0.2231	0.7487	0.3842	0.4782	1.0329	0.0708	0.2298	0.6342	0.6175	0.094	0.1913	0.3095	0.3877	0.8432	0.1693	0.3343	0.6841	0.4615	0.2953	0.1386	0.5979	0.2773	0.6948	0.4512	0.4796	0.5609	0.9291	0.2622	0.1531	0.159	0.5042	0.1543
AL121890.5	0.348	0.6334	0.2394	0.6561	0	0.5871	1.264	0	0.1853	1.7999	1.0652	0.6932	0.7791	0.2172	1.5787	0.5719	0.2361	0.4512	1.1848	1.5538	0.2579	0.4642	0.2863	1.3013	0.3847	0	0.1902	0.3095	0.5008	1.12	1.8055	0.4566	0.4917	0.9881	0.711	0.4778	0.5604	0.1935	0	0.1813	1.0735	0.1616	0.3781	1.1273	0	0.6193	0.536	0.2719	0
AC027801.1	1.7129	0.7886	1.2131	0.6649	0.3338	1.4732	2.7629	0.2151	0.5364	1.4548	3.6238	0.7694	0.4793	0.6289	0.8162	0.2208	0.6494	0.4573	1.334	0.9897	0.9706	0.9407	0.6631	1.3725	1.7452	0.3944	0.3028	0.1344	1.1961	0.908	0.4066	0.2974	0.605	1.6307	2.0327	0.7838	0.3407	0.2801	0.7067	1.076	1.3054	0.7488	0.6385	1.7044	0.614	0.2241	0.6983	0.5904	1.2317
AP006621.4	4.1762	0.4343	4.9252	1.1248	0	1.0065	3.828	0.1698	0.1059	1.7999	0.837	0.3961	0.5565	2.3585	0.9021	0.3268	0	0.7736	1.1284	0.3552	3.3892	2.7851	0.1636	3.1869	1.3191	0.2595	0	0	1.7884	0.256	1.9488	0.1305	0.2809	0.7905	5.4847	0.91	0	0.2211	0.4524	0.7251	5.3982	0.4619	0.072	2.1472	0	0	0.245	0.3108	1.1669
AC244153.1	3.8996	2.2835	2.3328	0.7192	1.423	2.6219	2.6786	3.4383	0.7221	6.9054	0.4217	3.2085	2.0402	0.635	3.9555	2.9254	1.2077	1.2091	2.1806	0.9841	1.8845	1.1307	1.7434	1.8113	1.7807	4.0558	1.6676	1.3571	1.0673	5.7293	2.5411	2.5025	1.7964	1.0591	1.0391	4.3059	0.9829	3.2988	0.9	0.4416	0.7845	1.4175	0.4912	2.929	8.7818	3.4696	2.7941	1.1922	0.4421
AL158151.4	1.878	0.9115	0	0.3934	0.1844	0.2347	0.7579	0	0.6665	1.5289	0.479	0.9699	0.4672	1.3025	6.8968	0.4572	0	0.1353	3.1575	0.1863	0.3092	1.2525	0.1717	0.7803	0.4614	0.0908	1.3683	0.5568	0.9008	1.3431	2.8869	0	0.2948	0.237	0.9592	0.2865	0.1344	0.232	0.0791	0.3261	0.1287	0.2908	0.2267	0.8261	0	0	0.1928	0.163	0.4762
AP001626.1	0.7785	2.0106	1.5046	0.0349	0.3766	0.8964	1.3463	0.3482	0	3.3711	0.7517	2.043	1.0166	0.3239	12.2758	0.6498	0.3521	0.2403	1.0377	0.2648	1.0163	3.4363	0.2135	1.6435	3.702	0.258	0.5672	0.1978	0.2	0.0477	0.6411	2.067	0.8117	0.2105	0.4733	0.5089	0	0.5976	0.1265	1.4289	0.5946	0.1033	0.3356	8.005	0.8132	0.7916	0.3197	0.6372	1.1359
PINK1-AS	4.048	2.271	7.814	2.6599	3.6185	4.7268	3.3728	4.7578	3.7521	2.1039	1.321	1.9448	2.8786	3.8347	2.0524	3.1956	2.0516	2.4392	1.3421	3.1257	3.0172	5.6692	2.5661	2.1624	4.9228	3.0967	1.2361	2.1814	2.9038	3.0807	2.6217	2.843	3.1117	2.8126	2.1283	3.1927	0.9663	4.1168	2.9161	1.7737	3.2759	5.0767	0.9054	3.0338	5.717	1.9915	1.9804	5.3581	1.4981
AC010976.2	3.6011	3.2545	10.5929	1.4046	1.0971	6.7733	18.8064	0	0.1322	5.6729	0.6651	5.6891	2.2239	1.2401	2.897	1.2243	0.6739	1.0466	4.4624	1.5524	5.2446	5.4656	0.6129	4.2452	4.6217	1.5662	0.2714	0.1104	1.1614	0.3996	2.8632	1.2219	1.7543	0.4231	5.2639	1.6479	0.08	0.2071	0.9887	1.0349	2.0684	0.6345	0.9443	8.6255	2.27	0.3314	7.497	0.3881	0.5262
AL357874.2	0.9349	0.8508	1.5007	0.7344	0.2753	0.7009	0.3395	0.0665	0.4147	0.6044	1.2519	0.3104	0.2616	0.4863	1.1107	0.0853	0	0.202	0.6484	0.4174	1.0391	0.4156	0.2564	0.9155	0.8039	0.2033	0.0851	0.4157	0.1681	0.4012	0.0898	0.2044	0	0.8848	1.3529	0.5704	0	0.4331	0.1772	0.4058	0.5768	0.6514	0.1128	0.3365	0	0.6932	0.048	0	0.2032
LINC00852	2.151	1.711	3.2884	1.5395	1.3373	2.4639	3.2117	0.7143	0.7634	1.4077	0.6706	2.1159	1.6497	2.5858	1.4456	1.0037	1.4052	0.9813	1.5972	1.6362	1.0626	2.2314	1.3763	2.0001	1.2624	1.8018	1.7848	0.496	1.8054	3.3331	1.1022	2.1427	1.0692	1.0858	1.302	1.8228	0.6158	1.1072	0.9364	1.9504	1.7202	1.1471	0.6058	3.0106	0	1.9847	2.4294	0.8714	2.2853
AC068888.1	2.0771	3.4074	4.7381	2.1061	1.6239	3.6424	2.025	1.8728	2.7061	4.0933	10.7183	4.1376	2.455	2.721	6.2611	3.2336	1.335	1.5947	1.4681	2.3063	2.815	4.8118	1.6076	4.6864	5.0056	1.6642	5.2791	1.6408	1.7205	5.3391	3.2769	3.0569	2.5676	3.073	2.5196	1.9573	0.4093	2.2258	0.9274	2.4772	1.9727	1.2949	0.9749	6.8954	5.4126	2.76	1.6964	2.7866	1.47
BAIAP2-DT	30.2561	26.2876	39.3118	18.3138	22.9125	45.271	18.0892	35.8469	30.1364	24.6949	2.7987	23.0041	21.5609	24.3507	17.2375	37.8568	20.8565	21.3399	13.7764	20.4463	21.1545	15.8022	28.154	44.8748	30.1411	32.2288	17.2833	34.598	15.9947	13.297	13.2116	34.5492	20.323	20.8569	25.0079	29.7394	2.2345	31.2364	11.7069	69.381	23.37	27.9424	4.503	33.9368	32.2274	26.9202	17.3356	42.4123	14.2487
AC008105.3	3.6135	1.3747	1.6635	7.8497	0.7081	0.7028	3.8681	0.232	0.3616	2.1311	0.1455	2.3813	1.6727	1.8315	3.2397	0.2679	0.4608	0.687	13.8234	0.3154	1.3287	1.1053	0.2012	2.1044	2.6532	0.2954	1.0243	0.4591	3.0102	5.2638	6.985	0.2317	1.1131	4.1503	3.4552	1.0692	0.7175	0.2568	0.3811	2.6465	7.8276	1.0727	0.1476	4.4687	1.5894	0.145	1.2972	0.6368	2.595
AC005387.2	2.164	2.1882	1.4887	3.7398	0.1062	0.8113	1.9212	0.308	0.256	2.6944	1.196	1.5966	0.8074	2.2513	2.0257	1.4488	0.4894	0.4677	2.9106	1.0736	3.3852	1.7639	0.3956	1.7982	3.3671	0.1046	0.2628	0.2139	1.0379	1.5477	2.7721	0.3155	0.6794	1.502	3.9298	1.4304	0.0774	0.401	0.2735	0.3757	2.6701	0.5584	0.5224	2.8558	0	0.4279	0.9629	0.3757	0.627
AC010491.1	1.0591	0.4681	1.1189	0.8557	0.117	0.1064	0.6457	0.1615	0.2416	0.8151	0.9552	0.3265	0.4446	0.6847	1.2992	0.145	0.077	0.6866	1.3307	0.2702	0.4484	0.2775	0.3112	0.5253	0.9757	0.1152	0.4547	0.2691	0.4082	1.3878	1.7225	0.1241	0.2939	1.0095	0.3477	0.3635	0.0365	0.0421	0.1291	0.7093	1.1668	0.1054	0.1233	0.5037	0.2766	0.0337	0.3728	0.1182	0.5549
AC069544.1	2.9653	1.542	4.1528	1.8967	1.0292	1.9652	2.2309	1.0851	0.5638	3.4689	1.4992	2.6721	0.8298	2.3136	2.6766	1.6823	0.5748	2.4717	1.9229	0.2837	2.5111	2.4719	0.8712	1.8668	2.6148	0.6909	1.6781	0.5651	1.4476	22.631	3.6628	1.32	1.1969	3.488	2.7044	1.5992	0.1364	1.3541	0.4417	15.3359	3.0054	1.6725	0.6903	1.4484	1.2907	1.6961	1.3701	1.7376	1.588
AC245884.8	5.41	3.1947	6.4512	6.913	1.0091	2.4338	9.9991	0.4106	0.576	7.2023	4.8758	11.4154	2.0186	7.5793	16.1277	0.2634	0.4894	1.0133	8.2771	0.9662	3.6524	3.1269	0.3956	5.1376	8.7722	0.9412	2.1678	0.9623	3.676	2.9406	6.2372	0.7098	1.1889	2.3212	5.4649	1.3203	0.7744	1.203	0.7749	1.9414	5.3402	1.1168	2.0027	6.9231	1.7582	0.6418	1.7776	1.5029	1.6852
AL445222.1	2.8639	1.7171	1.8543	2.4614	1.6372	2.2736	3.9771	0.6473	0.4484	5.3729	1.8692	2.1254	1.98	3.4701	4.8037	2.307	1.4857	1.3106	1.3383	0.6017	2.1221	2.247	1.9402	2.2498	2.1729	1.0991	1.841	0.899	1.9392	1.9518	3.496	2.0998	1.071	3.444	4.9044	2.8523	0.7596	1.4048	1.3414	0.9653	2.8062	1.565	0.8541	0.6063	1.2319	0.4497	2.1795	1.3162	0.9336
LINC02048	2.0287	9.5376	6.4142	0.3662	2.4407	2.2574	1.1758	1.161	1.6085	6.9949	0.033	1.9203	2.295	9.6456	12.0564	3.2392	2.2841	1.5112	0.3919	1.0792	3.998	6.1603	0.5326	3.9198	7.7307	0.5444	1.0378	0.8446	2.6396	0.1389	2.314	0.0283	0.1525	2.3777	4.3651	1.9752	0.4588	2.0156	1.7512	2.3384	1.0119	1.6842	0.0156	3.309	0.3682	2.3811	1.2365	3.069	3.391
AC015802.3	3.8978	2.0945	2.4261	1.8371	0.082	0.7306	3.3706	0.1585	0.2964	5.2797	2.6276	1.9719	0.831	1.5061	1.9245	0.61	0.3777	0.6017	1.7553	0.663	1.2378	0.9903	0	1.7846	3.078	1.2917	0.6085	0.4952	1.2018	4.5398	2.7818	0.8523	0.9178	2.2134	2.3699	0.5945	0.1196	1.135	0.2815	3.4806	1.1451	0.4311	0.6721	2.8725	2.0358	0.4954	1.5437	0.5801	0.9681
AC092718.4	6.2059	5.056	6.4041	6.3375	10.7701	8.3922	11.9138	6.3715	6.2141	12.0998	15.3208	10.498	8.5179	10.0532	9.5757	5.9084	8.7209	12.645	12.3529	9.632	6.3503	38.9237	18.4763	34.4135	5.4452	6.0411	13.3219	9.7249	11.481	61.0594	22.9122	6.3006	11.6899	10.8242	6.1883	6.5587	3.5216	6.8999	7.7312	12.6229	17.4112	9.1282	5.9929	7.5516	9.184	6.442	11.925	7.6195	12.716
LINC00667	13.9085	7.7603	15.4017	4.0261	9.7648	10.0255	8.0283	8.3723	6.5392	11.7675	6.7491	6.9803	9.9899	7.3535	11.4791	15.3517	7.5086	6.0204	6.8909	9.6214	9.273	16.3143	7.8204	19.5173	14.8974	5.0875	7.6628	5.4067	8.2946	26.6142	7.8966	8.6772	13.6818	23.0815	11.3487	10.1008	3.6119	13.2554	5.7384	8.73	12.3762	11.0268	4.3231	16.3339	4.5602	9.0737	5.4498	9.0161	4.8038
LINC00958	19.8208	6.2406	6.2692	19.1679	4.3091	12.4863	3.1898	5.3779	9.6046	5.2472	13.9536	2.3984	10.652	7.4049	3.1489	16.5516	5.2616	6.3597	1.2693	13.4751	3.3558	5.5393	6.667	4.7013	9.5408	8.6448	5.5404	3.3757	1.6159	13.0176	1.3423	10.0678	34.5423	13.1402	7.548	3.0206	4.3404	11.6505	2.8086	4.0497	8.0993	12.0511	8.9903	10.3673	3.2402	5.2205	5.0719	9.2831	2.5283
AC010307.4	0	0.0926	0	0.1199	0	0	0	0	0	0	0	0	0	0	0.1648	0	0	0.6595	0	0.2271	0	0	0	0	0	0.1106	0	0	0	0	0	0	0	0	0.1299	0	0	0	0	0.5299	0	0	0	0	0	0	0.0783	0	0
SERTAD4-AS1	8.7461	8.2086	16.0935	0.447	4.7946	8.2958	9.0703	21.0545	11.1069	25.4327	11.3695	20.3609	3.0667	1.1182	18.3697	13.3333	7.935	6.4217	8.3709	3.7639	10.1505	11.1736	5.6346	13.453	3.2231	7.1039	19.4616	16.1198	9.7038	24.2817	9.7796	20.9456	4.6149	2.0345	11.3559	4.9184	2.0023	10.3684	3.5558	6.5868	6.2409	4.454	1.2211	10.6571	4.238	16.5012	10.4193	13.5845	2.2327
AC118344.1	0.796	1.159	2.5887	0.8186	0.2877	1.3429	1.0776	0.3089	0.2311	1.1228	0.3876	0.1922	0.2025	0.3614	0.1876	0.7135	0.2946	0.2815	0.4654	0.2585	0.6971	1.5926	0.1786	0.6185	0.8	0.7869	0.1186	0.4505	0.6247	1.211	0.5423	0.3798	0.3578	0.5342	1.2197	0.4636	0.0466	0.4425	0.2195	1.1685	1.2947	0.4033	0.2883	0.7813	0	0.0644	0.1115	0.6219	0.3538
AC124944.1	1.7036	7.5349	1.8166	1.887	0.1505	1.9639	11.7872	0.1818	0.9976	12.4456	3.194	2.7715	1.6686	3.9878	57.0799	0.6999	0.4623	0.2761	2.3523	0.6085	1.3886	3.8629	0.3504	2.5481	8.0361	0.8521	0.2793	0.3788	1.2257	2.9059	0.7856	0.1118	0.9026	8.4652	8.5272	1.0135	0.192	0.5209	0.7105	1.1093	0.6306	0.5539	0.3393	6.5301	0	0.6063	0.3936	0.3328	1.1385
AC022400.3	1.8496	0.6733	2.7994	1.2205	0.6536	0.6241	1.6122	0	0	0.9566	0.5661	0.2456	0.207	0.4618	0.2397	0.8105	0	0.2398	0.1399	0	1.6446	0.9868	0	1.1856	0.5453	0	0.2021	0.658	1.1976	0.4762	1.0662	0	1.3065	1.2604	2.4561	0.3386	0.2383	0.8226	0	0	2.0539	0.5155	0	0.932	0.4508	0.6583	0.3418	0	0.3618
AL645608.6	4.8226	0	0	0.2841	0.2663	0.1695	0.6568	0.5147	0.4814	4.2869	0	1.401	0	0.9407	0.7813	0.1651	1.4314	0	6.2711	0.5383	0.67	0.603	0.248	1.2881	0.1111	0	0	0.8042	0	0.582	0.1737	0.7909	0	0.6847	0.4618	0.9655	0	0	0	0	0.3719	0	0	0.8679	0	2.4136	0.1857	1.1775	0
AP001107.4	3.1405	2.5008	3.916	2.0353	1.0405	0.9934	5.6318	0.3352	0.418	5.3295	2.7036	2.4763	0.769	2.5729	9.9218	0.5376	0.2663	0.2545	2.2275	1.4022	3.0543	2.2253	0	3.6697	4.1953	0.683	1.1798	0	1.4121	8.5911	3.2812	1.0301	0.9705	1.7834	4.5112	0.6287	0.0632	1.2003	0.2233	3.4763	2.4219	0.4559	1.2084	3.8148	0	0.8732	1.1488	0.6134	1.4076
AC004067.1	3.0228	1.2104	1.7676	1.3535	1.4688	1.6148	1.7017	0.6453	0.5632	0.7165	0.9831	0.6021	1.8609	1.0377	0.4897	0.4967	5.7418	0.9799	1.5437	1.7545	1.0079	0.8063	1.3677	5.5707	1.0025	1.5119	0.8258	0.8065	2.9902	1.7511	8.3638	1.4872	1.8149	1.7165	2.3158	1.729	0.3894	0.6721	1.7191	1.5746	4.6621	1.8252	0.1095	1.4143	2.0261	0.1345	3.2589	2.4798	2.6112
AL035404.2	0.348	0.5067	0.4788	0	0	0.9785	0.3792	0.1486	0	5.8496	0	0.6932	0	0.4345	0.6766	1.3344	0	0.4512	0.5266	0.3108	0.5157	0.4642	0.2863	0	0.8977	0	0	0	0.2504	0	0.6018	0	1.2291	0.5929	0.8887	0.3185	0.1121	0	0	0	1.7176	0	0.3781	0.6263	0	1.5482	0	0	0.1134
AC125494.2	3.8647	4.1032	6.5361	1.8974	4.4815	5.5237	10.8197	3.0937	2.2288	8.3283	2.1564	5.56	3.3346	2.7139	1.5653	1.7641	2.6218	2.9231	2.132	2.3007	2.8637	7.4099	2.252	7.3115	5.3407	2.6614	3.9595	2.7212	3.3597	4.3533	4.2699	2.2184	0.7962	2.469	3.7833	3.0212	0.6223	4.0283	1.7706	1.3421	3.3777	4.5626	0.8164	3.6512	9.2238	2.7222	4.7618	4.2777	0.5774
AP003119.2	2.092	0.4352	0.6168	1.8312	0	0.3361	1.3025	0.2552	2.2273	0.5152	1.7152	1.1907	0.5018	7.2753	1.5494	0.1637	0.2027	2.1313	2.2611	2.135	0.2215	0.5979	1.2293	0.4789	0.2203	1.8198	0.9798	0.5316	0.43	31.1632	1.3782	3.9211	1.4777	3.3943	0.1526	0.1368	0.9625	0	1.2464	6.6941	1.1063	4.9974	0.5411	0.7529	0.3642	3.4568	0.0921	0.7005	1.7536
AC093484.4	1.7401	1.3935	2.873	5.905	0.7687	0.9785	1.0112	0.2972	0	1.1999	0.5326	1.3865	1.753	1.0861	2.9319	0.3813	0.4722	0.2256	2.3697	0.3108	2.3209	2.7851	0.2863	1.1154	2.8215	0.4541	0.3803	0	2.1282	3.3601	0.2006	0.2283	1.475	3.162	8.1763	0.9555	0.1121	0.3869	0.132	0.5438	1.0735	1.4548	1.2603	4.0081	0	0.6193	1.1792	0	1.2479
AC115618.1	1.5417	1.403	2.3863	1.5441	0.8513	1.3004	1.5398	1.7277	1.6414	1.9933	4.3502	0.7677	0.755	1.5637	2.3728	2.7445	1.1766	1.2494	1.3122	1.5487	1.8563	1.2852	0.7926	1.3382	1.5623	0.8382	0.7371	0.857	0.9012	8.0625	0.7776	1.0113	0.8167	0.8755	3.7401	2.2928	0.3103	1.2855	0.8768	3.2122	1.3078	1.5217	0.9072	2.8437	0	1.2002	1.7214	0.9034	0.7538
AC018648.1	0.7919	0.8071	0.4358	1.1197	0.4897	0.0891	1.438	0.4733	0.0843	1.7065	0.0606	1.3671	0.4432	0.5932	1.0264	0.347	0.2149	0.308	1.1982	0.7071	0.9388	0.9506	0	0.6768	0.642	0.4133	0.3462	0.1409	0.7406	0.4078	0.913	0.3117	0.1119	1.8887	0.8898	0.2174	0.4591	0.1761	0.3002	0.33	0.8794	0.6621	0.1147	0.456	0	0.1409	0.2439	0.3712	0.7744
Z98884.2	7.8069	3.8218	7.9636	6.2172	3.9244	6.6608	4.9864	1.9538	2.1496	6.9614	1.854	1.6087	2.26	3.3607	7.3272	3.9814	1.461	0.5236	3.9716	0.9616	2.1942	7.1812	0.2215	5.033	4.5634	2.9272	0.5884	0.9577	4.6482	8.3172	6.5176	3.1788	1.9016	3.516	10.037	3.4493	1.3005	2.5441	1.8372	1.823	5.1485	3.001	1.2673	5.3289	7.2178	2.3952	3.5657	4.6273	2.1939
FOXN3-AS1	6.6798	6.2577	13.6511	2.1761	14.7541	8.0097	13.2363	8.8491	1.5165	15.3684	11.8016	28.8299	13.0849	16.494	6.748	6.0265	5.9977	3.6938	2.6383	7.7192	5.6047	8.1889	3.9597	4.7226	24.6884	7.6051	12.5065	11.7946	2.5796	34.9023	5.6059	3.9954	3.4	7.0287	14.0982	6.0685	7.593	4.6963	5.2515	9.4664	2.6665	3.9696	4.2687	22.8392	42.9789	4.8071	7.4134	11.5125	3.6505
AC008897.3	0.8762	0.3987	0.4521	0.3097	0.2903	0.9854	1.0342	1.2157	0.2332	0.5664	1.0057	1.8907	0.7356	0.1367	0.4259	0.3599	1.0402	0.284	0.4972	1.3692	0.3246	0.4382	0.5406	0.585	0.7265	0.1905	0.9575	1.3637	0.2364	0.141	0.6313	0.1437	0.1547	0.6219	1.1187	0.3007	0.1411	1.2177	0.6644	0.6846	2.4324	0.1017	0.238	1.0249	5.6059	0.9744	0.4723	1.198	0.2142
AL513218.1	1.0823	0.591	0.7446	2.2955	0.3586	0.1522	1.2775	0	0.2881	1.0496	0.7247	0.7187	0.1514	1.0134	2.2796	0.4446	0.3671	0	1.6377	0.2416	0.802	0.3609	0	0.2891	1.5954	0.1177	0	0	0.876	1.045	0.7799	0	0	1.0756	2.7639	0.3715	0.3486	0.3008	0	0.4228	1.0016	0.1257	0.5879	0.9738	0.9893	0.4815	0.4167	0	1.1466
RNASEH1-AS1	3.0939	3.6426	5.6537	2.3582	2.8296	2.5146	2.1157	8.6993	4.8381	4.6983	6.7048	3.3704	4.3695	2.5649	1.958	4.5677	4.1978	3.8863	1.4081	2.0289	3.385	3.9654	3.599	5.1517	5.1306	3.1118	2.7736	2.6442	1.8172	7.0478	2.4801	5.2485	5.105	4.557	3.2221	2.4444	1.5569	3.5608	3.3359	10.6392	3.5938	3.0987	3.6763	5.7416	0.4419	3.527	2.1741	4.7401	2.2771
AL135910.1	0.747	0.9096	0.9038	0.2792	1.3428	0.9126	1.3098	0.7369	0.7131	2.2316	0.2957	0.5131	0.2739	0.5306	1.4357	0.3951	0.2272	0.6012	0.8283	0.9201	1.088	0.4467	0.5722	0.4954	0.6835	0.6498	0.929	0.5499	0.4633	7.9754	0.2821	1.0646	2.1471	1.6237	0.5263	0.3065	1.4021	0.759	0.1953	0.1879	0.8741	1.1247	0.4664	1.2702	1.7581	0.848	0.4999	0.322	0.2687
AC116552.1	4.4743	1.0508	1.1915	1.0204	0.3826	0.7305	2.3065	0.0616	0.7683	0.8709	0.0552	0.2875	0.5655	1.6217	3.1802	0.5534	0.0979	0.0936	0.4368	0	0.4278	0.5775	0.2375	0.771	1.0106	0.1883	0	0	0.675	0.7432	1.4144	0.0947	0.8156	1.5573	1.7692	0.3302	0.0465	0.1605	0.1642	0.3007	1.0685	0.2682	0.1045	1.2987	0	0	0.3112	0	0.4234
RHOXF1-AS1	0.7623	0.6013	0.6701	0.3194	0.0935	0.6669	1.3229	0.1266	0.2706	0.3651	0.1782	0.3656	0.5689	0.4494	0.247	0.3944	0.3448	0.1647	0.2563	0.1891	0.1883	1.271	0.1394	0.3394	0.4682	0.2026	0.2314	0.5274	0.3961	14.639	0.3906	0.7224	0.2393	0.5532	0.6922	0.407	0.0136	0.259	0.3212	7.8539	0.8884	0.4918	0.1994	0.4725	0	0.1884	0.2218	0.1985	0.566
CTD-3080P12.3	1.562	0.5467	3.4304	0	0.5573	0.6081	4.7785	0	0.6077	0.5179	0.046	1.3164	0.269	0.7125	0.8955	0	0.2038	0.3895	0.1818	0.1073	2.2258	0.1603	0.3954	0.9948	0.8856	0.1307	0.197	0.5343	0.3026	0.0387	0	0.0394	0.1697	0.1706	2.332	0.3024	0	0.3006	0.0683	0.6572	0.6301	0.7813	0.1958	1.492	0.0732	0	0.8513	0.1408	0.0392
NRAV	17.4885	10.814	17.1625	16.2814	15.2374	19.726	8.774	18.3781	28.1193	10.7301	3.9349	13.3195	15.0879	13.252	8.1826	14.3204	16.0952	11.9652	6.6252	15.9803	11.2044	8.777	15.5596	22.8041	14.9908	6.156	12.8109	18.7692	17.9481	8.1107	8.423	10.2035	15.3023	15.4967	20.3345	16.3783	2.7138	20.9016	11.8814	28.1517	16.0503	20.5976	3.7703	14.4209	1.8925	8.9239	8.108	24.1854	7.7588
TRAPPC12-AS1	4.8937	0.9755	2.7254	2.9106	1.9559	5.7658	2.1582	1.8406	3.1633	5.0719	5.8846	0.3095	2.7389	1.8182	4.9081	1.3403	1.8971	3.5503	2.4242	4.2658	4.0578	2.3311	2.0129	8.5269	1.9322	2.7873	0.3183	2.1762	1.0478	2.3999	6.3135	2.1402	2.2222	3.4406	3.392	4.1588	0.1876	2.0727	1.0161	6.2515	8.9853	2.273	1.8565	3.1871	0.426	2.1771	1.974	2.0028	1.6712
LINC01730	0.753	0.3655	0.1727	0.6507	0.1109	0.4234	1.9144	0.2143	0.2004	1.1359	0.2401	1.4166	0.2107	0.5484	1.1386	0.3437	0.6811	0.3255	1.7566	0	0.465	0.5859	0.1032	0.3352	0.74	0.0546	0.1372	0	0.2257	1.0501	0.217	0.0823	0.0886	0.7127	0.7051	0.0574	0.6063	0.2791	0.1903	0.8499	0.8517	0	0.2727	0.9034	1.0706	1.34	0.1546	0.1961	0.0818
AC092953.2	1.2108	1.9834	1.666	3.4241	1.5378	1.8725	1.0444	1.1631	1.692	3.1311	1.3319	1.005	1.2706	1.7005	2.8445	1.8239	2.3616	0.6869	2.2329	1.2164	0.8972	1.615	1.6186	2.1021	1.7291	1.5141	0.827	2.1538	2.5045	0.8768	1.3087	1.6879	2.6728	2.8363	2.3191	2.8397	0.8287	2.1035	1.779	1.971	2.1476	2.1794	0.5481	2.2334	0	2.2893	0.8392	3.0746	1.6282
AC127024.6	0.2495	0.1817	0.6866	0.4704	0	0.5613	1.2687	0	0	1.5056	0.5728	1.1598	0.2793	0.4672	1.1319	0.2734	0.1693	0.3235	0.0944	0	0.3698	1.3312	0	0.3999	0.3678	0.3256	0.1363	0.2219	0.359	0.4818	1.2945	0.4911	0	0.2834	1.0195	0	0.1607	0.2774	0.2838	1.2998	0.6157	0.4636	0.3614	0.449	0	0.666	0.6149	0.195	0.3254
AC093627.5	4.1365	4.1946	6.3157	6.0875	4.9971	4.5691	4.0164	1.8561	1.865	4.5297	3.0765	3.3352	3.9451	2.6083	3.4602	3.8148	1.9615	1.5735	1.916	2.563	3.0494	2.8571	4.6355	4.3177	4.3242	2.8547	2.2718	1.9146	2.0574	6.5611	2.8589	4.8318	1.5057	5.9923	6.4673	1.6128	1.1623	3.2263	2.4245	4.991	4.8044	3.1173	0.6878	3.9574	0.3344	1.9716	2.7499	3.1164	1.3484
AL163051.1	0.5598	0.1528	1.059	0.4287	0.1545	0.2754	0.864	0.2689	0.2235	0.8444	2.9984	0.3252	0.4699	0.6988	1.0883	0.4216	0.3797	0.5897	0.4764	0.0625	0.3111	0.3266	0.2878	0.3364	0.4899	0.3956	0.8411	0.0622	0.151	7.2511	0.9277	0.6426	0.1977	0.8344	0.679	0.2241	0.2028	0.3112	0.2918	4.6289	0.3885	0.3575	2.2551	0.4533	6.9073	0.4358	0.5388	0.4374	0.4334
AL117379.1	4.3756	1.991	6.2355	3.3881	0.7594	1.6697	4.9379	0.2669	0.9151	7.5434	1.9731	9.235	2.0116	4.1944	10.735	1.712	0.8481	1.3171	6.7391	0.6977	3.3581	6.0446	0.8999	4.0069	4.7223	0.4758	2.0494	1.2509	3.4853	4.627	7.2967	0.9227	0.5519	2.751	3.1128	1.5732	0.3523	1.3031	0.5925	3.5817	4.7241	1.3066	0.7357	2.9247	3.6186	0.5562	1.5885	1.4652	2.8527
AC012181.2	4.2248	4.3574	4.2386	3.4017	1.8663	3.4647	3.0688	1.2776	0.7497	0.9863	5.4555	0.8182	3.6453	0.7692	1.5971	0.7714	0.2388	1.4836	2.6636	1.8863	6.0002	3.4045	0.1448	0.5642	3.6976	2.4501	1.2504	1.0959	3.2295	1.3597	1.3192	1.9632	2.7356	2.9989	6.3835	2.8999	0.4536	1.37	1.6018	5.5018	4.0182	2.9436	6.6297	6.7791	0	1.0964	0.4338	2.2006	3.0413
AC072061.1	2.7941	1.0171	3.3557	0.8482	0.9414	1.7044	2.8896	0.9301	0.7815	1.5104	2.8629	1.2893	1.3783	1.3893	1.4118	0.882	0.7068	1.1053	1.5048	1.3532	1.0176	0.8527	1.0129	2.9092	1.2565	0.9681	0.9316	1.3478	0.9199	2.5605	1.5833	1.9572	0.6021	3.2002	1.9108	1.1702	0.1983	1.132	0.6464	4.1937	1.8406	1.3858	0.9604	2.4544	0.4617	1.5169	1.1378	0.777	0.6484
LINC02528	1.6617	0.2016	0.127	4.4382	0.9788	0.4153	0.0671	0.3153	0	0	0	0.3678	2.9968	0.1152	0.2393	0	1.5031	1.7955	0.908	0.3297	0.1368	0	0.3038	0.5918	0.2041	0.4015	0.6053	0.3284	0.5313	0	1.3836	0	3.2605	6.92	1.886	2.6192	0.1189	0.3079	0.49	0.0962	4.1007	1.2007	0	0.0665	0	0.3286	0.8531	0.1443	3.6112
AC120498.2	0	1.2373	1.1692	0.4005	0	1.1946	0.3086	0	0	2.9299	0.1626	1.9749	0.9512	0	4.1302	0	0	0	0.3215	0.3794	1.5742	0.2834	1.0486	0.4539	0.7829	0.1848	0	0	0.4585	0.2735	0	1.1149	2.1009	0	0.434	0.1944	0.1368	0.9448	0.3222	1.1066	1.3106	0	0	1.6821	0	0	0.7853	0	0.554
Z98200.1	0	0.4097	0.1549	0.7427	0.5966	0.8861	2.2074	0.1922	0	1.4552	1.0335	0.8968	0.7559	0.1405	1.167	0.2466	0	0.5837	0.5961	1.005	1.0008	0.7506	0.1852	1.2024	0.4977	0.0979	0.369	0	0.7288	0.7244	1.8166	0.2953	0.477	0.5113	1.2646	0.206	0.145	0.5005	0.0853	0.8208	0.6944	0.5228	0.8151	0.5671	0	0.6008	0.624	0	0.8072
AL031985.3	3.1536	2.3431	2.4964	4.2351	4.0839	2.5022	0.7374	3.8731	2.2537	1.7129	0.3967	0.8892	2.587	2.4269	1.7637	2.2243	1.9929	1.8485	1.9283	2.8546	1.9206	2.5065	4.7977	2.6538	2.8815	2.6117	1.6996	2.7664	1.4297	13.5138	1.4941	2.4372	3.6923	4.5139	1.721	2.2141	2.0731	3.2661	2.1129	1.6652	2.7451	2.4079	0.4693	2.3944	0.4212	4.2665	1.2376	3.7803	2.8305
HLA-DQB1-AS1	31.2406	6	8.5705	12.2854	2.794	3.7722	2.9932	5.8097	1.2243	3.2215	0.5133	5.345	23.4916	3.8283	9.5639	5.5641	5.981	5.9643	41.1086	3.2518	4.5445	5.3683	0.946	1.7405	4.4497	7.0023	3.7701	1.8751	12.8926	2.714	2.0991	2.1374	3.1138	46.1473	34.1632	10.6999	20.4936	5.2207	5.5228	9.9837	34.4082	4.0061	0.6246	11.8646	0	0.8526	4.0736	5.6903	6.3102
AC015726.2	0	0	0.5966	0	0.3831	0	0.6299	0	0.9233	0.7475	0.6636	0	0.4853	1.0826	2.2479	1.9	0	1.1244	0.6561	1.5487	1.2851	0.5783	0.7134	0	0.6391	0.3772	0.4738	0	0	2.2327	2.4994	0	0.6126	0.4924	0.4429	0.3968	0	2.4104	0	2.7103	0.535	1.6112	0	1.8726	2.1137	0	0.2671	1.3551	2.2615
AC136475.3	24.4808	39.9446	113.914	27.4833	5.9235	20.6842	137.345	9.8215	2.2921	74.6522	0.8943	11.2724	27.1961	33.4794	5.2617	4.1778	5.8419	7.8958	54.1215	7.4699	25.5234	100.254	6.3757	4.2714	82.2363	14.8211	1.9494	3.3918	120.234	2.1379	9.4315	9.2	12.9477	23.1931	274.257	21.6732	1.9018	0.4103	12.5003	1.6661	58.8182	0.7428	0.0891	149.298	24.438	9.1943	1.0989	17.397	6.697
AC039056.2	4.1408	0.6783	1.9941	2.1468	1.0975	0.6985	0.0752	0.6187	1.1022	2.6769	0.2376	1.3747	0.2317	0.9046	2.5493	4.8765	0.4214	0.8054	2.8195	1.479	0.9205	1.3807	1.1922	1.1059	1.2207	0.3602	0.4525	0	1.0427	1.9989	2.1482	0.9507	3.3637	2.5866	2.1149	1.6106	1.2669	2.9924	0.471	0.7549	1.5327	0.7693	0.9747	0.5961	0	1.1053	0.2551	0.9706	1.0798
LINC01238	1.1492	1.4978	2.2697	1.4327	0.4258	0.6045	0.727	0.1741	0.0789	1.2302	0.0851	2.5599	0.7054	1.3189	0.4564	0.2843	0.0503	0.1682	1.6547	0.4303	0.9064	1.6563	0.1525	1.5643	1.407	0.1129	0.1823	0.033	0.8934	0.1193	1.5813	0.1216	0.3142	0.9473	1.3821	0.441	0.0716	0.8037	0.1546	1.7572	1.8982	0.6543	0.0805	2.7751	0.3162	0.1319	0.1827	0.2607	0.9305
ST7-AS1	0.6161	0.4893	2.2733	0.7919	0.6927	1.3228	1.1391	0.7412	0.1491	1.0379	0.8143	2.38	1.4732	0.4545	1.234	1.4725	1.0639	1.5613	1.2924	1.5004	0.581	0.747	0.9215	0.8078	1.0732	1.218	0.459	0.2989	0.1612	4.9388	0.8394	1.9105	0.4352	1.622	1.6591	0.692	0.0541	0.8095	0.3822	2.2172	0.6219	0.6764	0.2839	2.0762	1.6382	0.897	0.7936	0.3501	0.5477
AC103724.4	3.2609	0.5276	5.2344	0.8538	0.8003	0.815	2.3686	0.6187	0	1.0931	0	2.8869	0.8111	0.4523	0.4696	2.1831	1.229	0.2349	1.2335	1.2941	0.2685	0.4833	0.2981	0	1.2017	0.6303	0.198	0	0.5213	0.4664	0.6266	2.6145	1.2796	1.0287	1.1103	0.6632	0.1167	0.8057	0.2747	0	0.447	0.8415	0.3936	1.5648	8.3897	1.2895	0.3348	0.2831	0.7086
AC073195.1	1.6889	0.2635	1.8258	1.1372	0.4796	0.2035	0.8763	0.309	0.3211	1.7157	0.4616	1.0413	0.3376	1.1295	1.329	0.0661	0.491	0.6257	0.7301	0.4309	1.609	0.7241	0.4962	0.8377	0.8002	0.0525	0.5273	0	0.4339	1.4753	0.9735	0.4748	0.1704	1.7811	0.4929	0.2208	0.0777	0.5365	0.2744	1.6338	1.3396	0.1121	0.0874	0.3039	0	0	0.3716	0.2828	0.2753
AL513320.1	4.2523	1.7336	9.0101	3.1265	0.3757	1.3391	4.3861	0.5809	0.6338	6.8176	1.3016	5.534	0.952	3.1851	4.2989	1.3975	0.8077	1.4335	7.5924	0.9113	3.9071	0.9075	0.1399	1.5446	9.2141	0.2959	0.9294	0.9077	2.7533	1.8612	6.5692	1.0042	0.1201	1.3523	6.0811	1.6345	0.1096	0.4728	0.258	2.0378	4.3023	0.8691	0	3.367	0	0.3027	1.991	0.7974	2.0515
AL133338.1	4.045	2.1071	4.9418	1.775	1.6636	3.0197	1.849	4.2578	1.1509	2.7052	3.122	2.3617	3.2006	2.133	3.5705	2.0629	3.028	2.3059	2.4535	2.9892	2.8422	2.0929	2.008	5.4018	2.6985	2.0323	2.477	4.2799	2.4585	4.8032	2.0503	2.3333	1.3794	3.0891	1.5673	1.3404	0.4717	3.9932	1.6659	5.8488	3.9583	5.1182	0.5556	1.9578	0.425	3.8472	1.4178	4.3046	2.5917
AL161669.3	30.3637	5.0556	9.9292	9.2412	1.203	2.6799	15.8742	0.4069	1.6671	18.9548	13.3887	11.03	2.591	9.5189	15.5301	2.8341	0.739	2.7365	3.7085	2.4317	12.6115	5.7207	0.112	5.7459	19.0672	1.1252	2.7528	0.2422	4.2123	7.7124	6.2791	0.8932	0.6733	12.526	29.347	1.9938	0.9209	1.4382	0.2581	19.0083	4.7881	2.9093	0.4438	12.5944	0.8297	0.6057	5.2008	1.383	1.2428
HDHD5-AS1	2.012	0.7934	1.7302	0.7112	0.5185	1.0371	1.5224	0.2147	0.357	1.8065	0.834	1.2246	0.4692	2.0931	0.7606	0.7347	0.2275	1.087	0.3805	0.2994	0.4969	0.6709	0	0.4478	1.8536	0.2188	0.6413	0	0.3619	0	1.2564	0.44	0.3553	0.8569	2.4834	1.0741	0.108	0.3728	0.3179	2.3581	0.7241	0.7009	0.1214	1.2069	1.6347	0.2984	0.4132	0.393	0.5466
LINC01230	0.0701	0.0638	0	2.1651	0.0155	0.0197	0.1274	0	0.0187	0.1511	109.079	0.0233	0.0785	0.0219	0.2045	0	0	0	0.199	0.0313	0.1039	0	0.0288	0	0	0	0.0192	0.0624	0	0.0451	0.1213	0.23	0.0248	0.1195	0.1075	0	0.4518	0	0	0.0183	0.3678	0	27.6323	0	1.2394	0	0.0324	0	0.0343
AP001793.1	1.6276	0.79	0.2799	0.7032	0.4194	0.7627	0.7389	0.1737	0	0.3507	0.2595	0	0.4555	0.0847	0.6153	0.3715	0.3681	0.0879	0.5644	0.4845	0.804	0.8141	0.1116	0.7245	0.8497	0.295	0	0.2413	1.0734	1.2223	0.5473	0.4449	0.2874	0.6162	1.3162	0.6827	0.2184	0.2262	0.36	0.4946	0.3347	0.567	0.3929	0.537	0	0	0.1671	0.3179	0.8401
AC007663.4	3.3533	1.1596	2.0762	1.8176	1.3332	1.8857	1.157	0.5011	0.5355	1.9511	0.8981	0.7793	0.6569	1.2559	1.1952	1.8368	1.2512	0.4348	0.6342	0.4492	0.6212	1.5654	0.6896	1.8808	2.9658	0.7292	0.6413	0.2982	1.3872	3.0218	0.7732	1.6499	0.5922	1.333	3.4253	0.9207	0.108	0.6524	0.5086	1.5721	1.3447	1.0903	0.6679	1.6293	0	0.8951	0.9296	1.179	0.5466
AC020907.4	3.4193	3.8072	7.7488	4.3607	0.622	2.0359	5.844	0.4294	0.8566	4.3343	1.3852	0.9349	0.9006	4.8963	3.9104	0.8814	0.2729	0.9128	6.7716	0.3592	2.6827	3.0851	0.3309	4.5125	6.3002	0.4374	0.6594	0.3578	2.46	3.2366	4.8696	1.3195	1.4208	4.5687	5.65	1.1965	0.7773	1.1181	0.9914	1.1525	4.8394	1.3079	1.0925	7.6733	0	0.179	2.1065	0.7857	3.8684
AC013731.1	2.5161	0.8723	1.9783	1.1294	0.2646	0.539	1.6536	0.0512	0.2551	1.5492	0.1834	0.4773	0.4694	2.1688	2.407	0.0656	0.2438	0.9321	1.3597	0.107	0.6215	0.3995	0.4928	2.0481	2.3843	0.0521	0.5237	0.1066	0.7327	0.5398	3.108	0.2358	0.0846	0.9525	1.1627	0.1097	0.0386	0.7327	0.1817	1.1858	1.6262	0.1113	0.4339	0.9918	1.0221	0.1066	0.1476	0.2808	0.703
AC006064.1	0.7557	0.9628	0.6498	2.048	0.2504	1.0624	0.4117	0.1613	0.2011	1.0585	0.2169	0	0.4229	0.5896	0.9795	0	0	0.1225	1.5723	0	0.6999	0	0	0.2018	0.6266	0.3287	0	0	0.6116	2.9185	0.5445	0.3718	0.4003	1.3947	2.9912	0.2594	0	0	0.3582	0.2952	1.5152	0.351	0.1368	1.1559	0.2302	0.1681	0.1164	1.0332	0.6158
PRRT3-AS1	1.3785	2.0698	0.1185	1.8679	0.2284	0.6783	3.3794	3.0161	3.9442	1.3367	0.1319	1.3729	1.2537	2.6888	4.3549	1.6045	0.9351	0.5585	0.7822	5.3853	1.1491	0.4596	0.4252	0.8284	4.3813	0.5246	0.9415	0.1532	0.4959	17.3016	2.7811	4.1823	1.0954	1.272	2.9921	1.3404	1.7203	1.2452	1.1106	1.6156	1.1693	1.6807	0.4992	1.9845	0.84	1.2265	2.0169	3.6349	1.4604
AC104031.1	18.486	24.9497	41.0873	6.3	29.9008	21.1104	2.6856	21.977	9.0839	32.2368	0	93.287	3.6609	44.0249	17.3248	2.1809	14.8561	35.5854	6.5626	13.2059	14.9622	27.5014	3.5094	37.9797	4.5066	2.2265	42.2688	18.7178	20.9724	0	17.7055	26.6794	17.2766	16.4732	0.7263	10.4114	5.9537	28.7741	9.5969	7.111	15.44	25.0989	0.206	18.9362	66.2014	6.3261	3.767	17.1097	5.1916
AC026471.4	18.1433	10.893	12.6439	12.2162	6.0371	8.3476	12.8367	3.6215	6.2717	17.5686	22.6284	15.1762	6.4619	18.9729	36.8006	6.1952	3.5167	5.0411	16.8463	3.1561	6.2854	19.1709	11.8241	15.6074	16.3244	6.149	3.4763	3.5626	6.7808	17.7448	28.2517	6.9558	8.322	15.3876	12.3955	8.0868	4.0221	4.9775	4.5562	15.2197	12.5015	5.3628	4.7783	19.2506	0.5743	5.8701	6.9678	8.6526	10.9069
AP002907.1	2.2195	1.0772	1.5778	2.3363	0.621	0.416	0.5643	0.0632	0.1182	2.4871	0.5095	0.1474	0.6625	1.3854	1.1986	0.4863	0.2008	0.3837	1.5952	0.6606	1.4802	1.4308	0.1826	1.1856	1.8812	0.1609	0.2426	0.2632	1.8629	2.8096	0.9809	0.2427	0.4703	2.1847	2.4183	1.1849	1.0246	0.329	0.5049	0.6166	2.2365	0.9278	0.5626	1.145	0	1.119	0.7293	0.4624	0.8923
AC073534.1	1.4026	1.3129	2.6191	1.6055	0.4868	2.6479	1.2372	0.385	0.2133	3.7134	4.4849	1.3305	0.8411	0.8755	1.4284	0.6585	0.8836	0.5196	2.1981	1.3419	0.8166	2.6057	0.9066	0.6957	1.2184	1.0894	0.6022	0.7128	1.4055	1.4832	1.2128	1.0516	0.2831	0.5689	1.5862	0.7794	0.1291	0.8911	1.2535	1.0959	4.6356	1.4891	0.5442	2.7765	2.5641	0.1783	1.5122	1.8004	0.5879
AC011468.1	8.9339	3.7085	7.2244	4.063	1.731	4.9357	8.7096	2.7436	1.4184	7.9711	4.9774	8.638	3.158	6.1635	13.2045	2.318	2.2329	1.8291	11.9174	2.3793	4.6455	4.3901	2.4498	6.2793	7.3932	2.4541	6.0806	1.8122	3.552	36.6213	8.6735	5.2438	2.325	4.1832	4.9632	3.5144	2.9783	4.2694	1.6045	2.2044	5.1248	3.4217	2.2703	7.1077	8.5958	2.5102	3.4279	4.7759	2.8612
CYP4A22-AS1	0.4595	0.5436	2.2918	1.8408	0.7612	0.5814	1.2099	0.2943	1.6511	1.3367	0.044	0.7627	1.2858	0.717	0.5955	0.1258	0.5455	0.0745	0.6518	0.2052	1.9577	1.3023	0.567	0.6136	1.5239	0.4497	0.2511	0.2043	1.3223	0.2958	0.6622	0	0.4869	2.0222	2.2294	0.368	0.222	0.2554	0.4355	1.5558	1.63	0.6403	0.1248	1.571	1.12	0.1022	0.2123	0.718	0.2247
AL139123.1	1.7223	0.1791	1.6926	1.1596	0.2174	0.2767	1.8765	0.105	0	2.757	1.6003	2.4505	0.6885	1.3822	1.1161	0.2695	0	0.9571	2.6991	0	0.1823	0.9845	0.2024	0.7886	1.904	0.321	1.0755	0	1.1506	1.1086	3.262	0	0.5214	1.2575	2.6389	0.1126	0	0.4103	0.0933	1.6661	1.6697	0	0.891	1.771	0	0	0.5305	0.7689	1.203
LINC00894	1.9003	1.1273	1.3315	2.3442	0.2332	0.4947	2.454	0.2103	0.2123	2.8716	2.85	0.8101	0.3873	1.5449	3.208	0.649	0.1989	0.3346	1.7173	0.3561	0.8692	1.4394	0.2509	1.3347	1.8502	0.2704	0.3397	0.1148	1.4895	2.2953	1.7784	0.2078	0.29	1.3189	1.6116	0.4992	0.1209	0.3326	0.2001	2.1998	2.1059	0.4904	1.2574	1.9125	0.243	0.1983	0.5456	0.2291	0.5736
AL121832.2	3.1676	1.7296	11.1136	2.6873	2.2388	3.9187	3.969	2.0285	2.2764	5.3925	9.2107	7.151	3.1911	4.1521	5.8504	2.2556	1.934	5.0313	2.696	0.99	3.2859	2.3237	3.6481	3.8917	3.7353	0.6888	2.5097	1.5495	3.1335	17.4321	5.2039	1.7663	3.2443	4.407	4.2063	1.9568	0.4591	0.7924	0.9608	11.4675	3.2244	1.692	1.5485	5.2442	41.6921	1.9728	3.9029	2.8461	2.8395
POC1B-AS1	1.4395	0.9394	1.5524	0.8313	0.3838	0.9772	0.6924	0.5371	0.8422	1.0731	2.2824	0.5511	0.7766	0.769	1.1262	0.5186	0.2991	0.454	0.9959	0.6832	0.615	1.1849	0.4587	0.5196	1.1661	0.4512	0.2764	0.3576	0.5505	0.7429	0.7775	0.4764	0.4855	1.6423	1.3446	0.5222	0.1921	0.3965	0.2508	1.2768	1.1121	0.7469	0.3569	0.9942	0.9167	0.2769	0.3595	0.5978	0.6595
AL355987.4	0.7078	0.5064	0.6884	0.9662	0.1509	0.3568	1.2232	0.5522	0.6496	1.4515	0.5042	0.9075	0.1366	0.6398	1.4551	0.2005	0.5133	0.3006	1.4771	0.0218	3.3817	0.2116	0.1004	0.4302	0.5666	0.0425	0.0533	0.1519	0.5443	0.4713	0.2954	1.3288	0.1724	1.275	0.8476	0.2792	0.1415	0.2035	0.2683	0.5721	0.3915	0.2721	0.4596	0.5095	1.7251	0.1954	1.3832	0.1335	0.3421
CTBP1-DT	9.592	9.9726	12.2112	8.7358	6.335	11.3356	4.2699	10.2177	9.7876	7.6034	8.4011	7.1416	9.1771	3.9859	5.3657	8.5444	5.5344	5.8327	3.5262	11.4648	6.6765	9.645	12.4651	7.0534	10.4648	9.0853	6.9711	9.8306	6.1417	12.8357	3.1039	8.3959	8.1899	9.2884	10.116	7.4972	2.9499	10.1757	6.3709	10.3525	9.3063	7.4026	2.0773	12.806	1.2861	9.5456	4.3132	13.4349	5.9978
AC069307.1	2.6035	1.7231	3.4193	1.5617	1.7774	1.5971	1.0315	0.4042	0.252	1.4281	1.2678	0.1572	0.7948	2.807	1.0737	0.5186	1.124	1.381	1.5221	1.0567	1.9291	2.0519	0.9735	2.5286	2.4422	0.5147	2.7159	1.684	1.5325	2.8945	2.0465	3.2606	0.8359	0.672	0.9671	1.2997	0.2287	1.842	1.0769	0.9863	1.8982	1.3192	0.9428	1.1926	0	1.0529	2.4059	1.1095	0.9258
LINC01637	1.8561	2.5337	1.4897	4.8844	1.4349	1.4786	4.2132	2.5754	5.5167	3.1998	2.1896	3.0811	2.5104	5.31	1.2028	1.4403	3.1479	5.3147	4.6223	0.9668	0.9169	5.7765	6.2348	3.718	4.1609	4.3055	4.0568	4.5397	5.1188	3.5841	5.7954	3.5514	4.261	3.4255	2.8439	2.548	0.548	2.5795	4.3397	1.9337	6.3933	3.3048	0.112	4.9545	7.3517	1.9267	2.5728	4.9548	3.3781
AC005534.1	1.466	0.7115	2.0171	0.691	2.0508	0.9618	0.355	0.3129	0.2601	0.9477	0.187	0.1622	0.547	0.1525	1.1084	0.9368	0.3315	0.3168	0.3697	0.6545	2.3536	0.9777	0	0.3916	1.0805	0.3188	0.1335	0.2173	0.6152	0	1.831	0	1.7259	0.9712	2.4958	0.4472	0	0.6791	0.2779	0.3818	0.1507	0.454	0.177	0.5276	0.5956	0	0.4516	0.9545	0.3186
AC068722.2	0.9724	1.4159	0.669	0.3666	0.3436	0.8749	1.0595	0.6642	0.2071	2.8498	0.7441	1.4205	0.3265	0.1214	2.2686	0.6392	0.3958	0.3783	0.5885	0.1737	0.4323	2.5939	0	1.0389	0.7883	0.5921	0.7439	0	1.3292	0	0.8968	0.2552	0.4121	0.6626	0.6953	0.089	0	0.4324	0.2212	0.9117	0.4799	0.9033	0.1409	1.4699	2.3702	1.2113	0.1797	0.3039	1.0143
AL355488.1	9.7259	4.4863	7.406	10.2353	2.1482	3.8618	4.6649	0.8241	1.3833	15.855	2.5992	6.1868	2.1399	9.755	13.5921	1.9724	1.0577	1.7328	6.5298	2.1546	5.4188	9.4321	1.7407	5.6712	9.4664	1.6146	1.785	1.6508	7.4245	7.646	7.8104	0.8523	3.3301	6.3873	11.0913	4.3826	1.1597	2.5589	1.3089	3.7513	8.9545	2.776	0.9141	6.6936	0.8143	1.3872	1.4522	4.7856	3.485
AC027682.6	3.7143	3.1402	2.7201	0.3953	1.6408	8.7589	4.221	2.4042	2.8064	8.1073	18.7036	5.4099	2.0788	2.0941	5.6682	4.2003	2.1133	6.9133	1.5863	3.1027	1.5981	5.9928	0.4928	7.5522	4.9893	0.7817	9.5584	2.8772	0.7327	1.4653	4.9037	1.179	1.2695	0.7484	2.6926	3.3993	0.4245	4.1296	0.5906	5.5547	0.4435	3.0052	4.8161	3.5792	23.5094	0.4264	3.2109	5.1487	1.2498
HOXD-AS2	8.7355	2.1943	3.0575	2.0225	3.7912	2.2694	3.2469	2.7917	3.3449	6.1207	0.0391	2.8832	2.4588	2.3596	8.1109	5.7083	1.7328	4.173	0.7343	0.9123	3.3689	3.2706	3.5301	5.6759	8.302	1.2443	3.7962	1.8174	4.8513	3.3868	1.0012	9.3164	0.3969	3.8583	2.7917	3.787	1.5301	2.925	1.5689	3.4593	0.977	3.5355	1.3134	1.9489	1.5565	3.818	1.6837	3.8716	1.8318
AC009133.1	3.1171	1.64	5.4601	4.1728	0.9025	1.7234	5.3846	0.4026	1.5896	3.0368	0.7015	3.5655	0.9969	2.4361	3.1064	1.1622	0.693	1.6303	2.6357	0.8187	2.1156	6.7778	0.4094	2.2107	5.2414	1.1507	1.5887	0.8853	2.2802	1.3151	2.7179	0.2062	0.7771	1.071	4.174	0.875	0.1012	1.0193	0.6257	2.1695	3.8622	1.0585	0.1802	4.8551	1.2769	0.2331	2.0252	0.2251	1.6223
AL645940.1	1.2468	0.4538	0.8577	2.0987	0.4721	0.7011	2.5875	0.076	0.3793	1.6888	0.5452	0.4731	0	1.6676	3.3473	0.2927	0.1208	0	3.5709	0.6362	0.6599	1.3066	0.4396	2.664	1.3127	0.3873	0.9732	0.1584	0.4485	1.4903	2.4641	0.4674	0.1258	1.3149	0.4548	0.163	0.2868	0.396	0.0675	1.2989	1.7581	0.2482	0.129	2.4359	0.2171	0	0.823	0.1392	0.929
CDC37L1-DT	2.4162	1.6334	4.1556	6.9956	3.1259	4.4644	2.2566	1.1053	0.735	4.5374	3.0376	6.5321	2.8978	3.0164	4.8094	3.4978	5.3859	6.0421	1.5669	2.9282	2.9413	2.0718	1.5618	3.1345	5.2153	2.1769	3.2064	2.763	2.5454	6.7764	1.8903	2.2644	1.341	3.4303	3.7022	2.9221	1.4452	3.2621	1.4396	6.4729	4.5784	2.7256	1.1875	3.8512	23.7681	1.9963	3.0834	2.0227	0.8439
AC105345.1	1.6644	0.6571	1.2902	0.3757	0.3521	0.5405	0.9791	0.2102	0.1622	1.95	0.8969	0.4981	0.328	0.1756	1.6711	0.4109	0.1431	0.4104	0.8513	0.6071	0.5385	0.8755	0.135	0.6887	0.9676	0.4486	0.2562	0.0834	0.2698	0.9053	0.7162	0.3998	0.1987	0.6656	1.0417	0.3433	0.0906	0.404	0.1155	0.7937	0.7376	0.3376	0.3396	1.215	0.1714	0.1251	0.2311	0.2015	0.3821
AC004854.2	3.6709	1.2561	3.7377	0.5191	2.4	1.6102	4.1331	1.3792	0.938	3.0377	1.2079	5.07	2.0956	2.0622	3.3781	3.0966	2.5402	4.0935	2.1663	1.3768	1.088	4.4067	4.4694	5.4906	1.5422	1.4689	2.5675	3.4608	1.2941	8.7426	1.3966	1.8302	1.867	4.336	1.9874	2.1502	0.3783	1.3877	1.1135	5.6984	3.6688	4.1946	1.0635	2.2725	1.5211	1.6984	1.5605	0.9752	1.412
CRNDE	7.4305	6.8341	2.7168	1.0273	1.2393	6.8724	3.5164	3.1693	6.8428	4.3867	0.8119	3.0854	0.7287	2.8197	6.6427	4.9803	2.9181	3.7121	3.736	4.4384	6.2734	14.1466	4.0002	13.529	10.004	1.1294	8.026	2.9173	10.8288	3.2687	2.1727	1.8545	4.3239	9.4031	12.8511	8.6734	0.8108	1.5555	2.7791	4.5038	5.5116	5.5496	0.3074	5.7602	2.6387	4.3648	2.4727	4.8726	3.2335
SNHG15	7.9502	16.9729	17.4983	31.3186	28.2858	9.5908	11.8327	20.8125	28.9249	24.5987	11.4787	27.2862	22.9993	27.3102	32.584	18.5225	16.9273	5.6592	30.5518	7.1712	13.0357	26.062	46.886	12.1378	16.7768	6.7989	31.0838	9.4596	18.5407	21.0395	9.6611	16.5096	11.3264	63.3578	23.3478	10.2504	10.7697	10.4517	19.1144	11.5005	18.9064	15.0704	3.9683	27.6758	60.8841	22.5591	5.9072	24.0698	28.8576
AC008443.5	0.4301	0.1566	0.2959	1.4189	0	0.2418	0.1562	0.1836	0	0.1854	0.4936	0	0.7221	0	0	0.2356	0.2918	0	0.1627	0.7681	1.2747	1.1472	0.7076	0.2297	1.1094	0.1871	0	0.765	0.7735	1.9377	0.9916	0	0	2.198	1.0983	0	0.4155	1.1954	0	0.224	0.796	0.5993	0.4672	0.4644	0	0	0.3974	0.336	0.1402
AP001160.4	1.1078	1.109	1.3337	1.0443	0.6117	0.4672	5.3312	0.2365	0.2949	2.1486	1.4835	2.2068	0.93	1.0372	5.205	0	0.3758	0.7182	4.0859	0.4946	1.847	0.7388	0.2278	5.178	2.7557	0.4818	0.6053	0	1.594	4.9914	3.6719	0.3634	0.1956	1.4155	1.556	1.1406	0.8028	0.154	0.105	1.8755	2.2212	0.3859	0.702	1.4952	2.0252	0	1.1944	0.6492	1.5348
AC018752.1	10.7851	3.9259	4.2398	1.4524	3.4031	6.3536	0.1865	8.332	2.4606	1.1067	1.965	0.341	10.3477	0	0.6657	8.7208	4.1809	1.3318	1.1657	4.1274	4.9472	3.425	11.4072	1.0974	4.9207	4.4675	1.1225	4.5677	2.9559	0.9917	0.5921	5.0537	5.4416	6.1245	5.5084	6.5804	0.4962	8.8505	7.7889	6.1531	2.8516	6.6794	1.4878	2.7726	0	1.8278	0.3164	5.6177	1.5067
AP000919.3	0.4408	0.2674	1.112	0.9003	0.9087	0.3305	0.2668	0.1255	0.0782	0.6333	0.2249	0.3903	0.329	0.3669	0.7618	0.2415	0	0.0953	1.612	0.5248	0.3266	0.294	0	0.2355	0.5956	1.0865	0.4015	0.1307	0.4229	1.135	1.2705	0.2892	0.6228	0.5007	0.4503	0.2017	0.142	0.2451	0.1671	0.3827	1.3598	0.6825	0.2128	0.4231	0	0.3922	0.0905	0.1148	0.2874
SNHG12	15.8968	6.2832	9.759	105.631	7.2196	3.9606	4.9629	4.7011	9.6375	16.6527	1.9642	11.4611	10.7431	13.2818	7.9555	6.602	1.2282	2.3474	10.3102	9.0797	13.4331	8.468	1.1017	2.7025	9.6509	2.4485	3.8621	4.8084	6.7176	8.0772	23.831	5.0759	5.6583	31.5321	8.7271	1.7931	3.8818	6.6727	1.6831	5.9554	9.8531	5.08	0.7454	8.9704	3.2038	2.9127	11.031	2.9258	4.7859
LINC01431	1.258	0.6411	2.3367	0.7708	0.3334	0.8489	2.1017	0.0537	0.1339	1.247	5.102	0.6682	0.9153	1.2564	0.4076	0.4134	0.256	0.9787	1.38	1.1233	0.7457	0.8389	0.1035	0.9408	1.9471	0.1641	0.4124	1.1188	0.724	1.7814	1.3778	0.4126	0.4443	1.0001	1.9275	0.7484	0.2431	0.4196	0.3339	7.0771	1.7074	1.3439	0.9567	1.4036	0	0.3358	0.7363	0.0983	0.6971
AC010997.2	1.2207	0.4444	1.6796	0	0	0.2288	0	0	0.2166	0.7015	1.0898	0	0.4555	0.508	0	0	0	0.5276	0.3079	0.7267	0.3015	0.8141	0	0.6521	1.7994	0.354	0	0	0.5855	0	1.6419	0.5339	0.5749	0.6932	0.8313	0.3724	0	0.2262	0.3086	3.1794	1.2552	0.378	0.2947	0.7323	0	0	0.1253	0.3179	0.2653
AL138724.1	0.7779	1.0265	2.0738	0.7333	2.4914	1.4764	1.8011	1.4115	2.1223	3.6042	0.7441	3.4866	1.5783	1.8209	3.0248	1.1718	1.1874	1.6391	2.0599	1.3893	1.1528	2.14	1.2799	2.4413	0.9675	1.1842	3.3474	1.7297	0.6996	9.6388	3.7556	1.9775	1.9232	3.3684	1.9369	1.0679	1.3153	0.8649	0.3687	1.1144	1.9197	1.7615	0.2113	1.5399	4.9773	1.9034	1.3179	1.2916	2.7577
PAXIP1-AS1	14.1156	10.0547	16.6472	5.3047	9.3844	8.175	11.139	9.8305	11.1841	18.5138	34.6653	17.0328	13.7006	10.7721	18.113	11.1227	11.1349	9.273	9.7747	8.7521	10.7026	20.2346	14.3512	13.5523	17.5409	8.7298	6.9442	7.8829	7.3044	15.0321	12.6513	11.8134	8.6458	23.8344	24.2629	9.6353	1.9484	9.2547	4.0895	25.7961	12.8455	8.0813	4.2965	21.4859	6.2297	11.7247	6.746	5.6059	6.7721
FLJ37453	6.7166	3.3014	11.1838	3.5891	2.0977	4.4505	3.729	2.7762	2.4824	6.8221	6.8583	8.4935	4.0943	3.1243	3.715	7.8502	2.7861	3.772	3.5603	2.9797	4.4063	6.134	2.921	2.0796	6.1957	3.5911	2.8285	1.9024	3.0009	14.7595	4.6855	7.2407	2.7197	4.0085	5.6373	3.7195	0.7991	4.6375	1.6383	3.2758	5.1202	3.9941	1.4098	5.8509	1.9812	5.1005	3.2286	2.908	2.0082
LINC01484	0.3713	0.2347	1.0755	1.0684	1.2603	0.1209	0.2413	0.2586	0.3329	0.9938	2.3178	0.6617	0.4922	0.3415	0.3673	0.2783	0.4375	0.152	0.2957	0.1221	0.1158	0.6777	0.209	1.7641	4.2271	0.153	0.4164	0.7995	0.246	0.2138	0.1464	0.0897	0.1656	0.1776	0.2495	0.0447	0.1259	0.315	0.0593	2.8298	0.3858	0.3358	0.184	0.851	0	0.0695	0.3431	0.1832	1.2039
AC004771.4	1.1712	0.8527	0.6714	0.552	0.1725	0.7684	0.3545	0.4167	0.7274	1.2619	1.0456	0	0.437	0.9747	1.1385	0.4277	0	0.3796	0.3692	0.1743	0	1.1716	0.4817	0.5213	1.7264	0.7641	0.1067	0.6944	0.4915	2.0103	0.5626	0.2561	1.2409	0.8868	0.997	0.268	0.0629	0.6511	0.222	1.5252	1.6859	1.088	0.4948	0.9835	0	0	0.2405	0.4575	0.6999
AL022328.1	10.4026	2.8199	14.0085	2.7123	4.2043	5.8497	8.9229	0.8504	0.8248	4.388	2.2865	2.9393	2.8491	3.8683	5.7374	2.061	1.8018	1.1479	2.4281	2.5693	6.3961	8.8563	0.7283	6.7391	5.0569	1.5403	2.1769	0.1969	3.4236	3.4191	6.762	1.5972	1.0944	2.1367	9.1565	3.5449	0.2139	2.7069	1.9301	2.767	4.0964	2.6729	0.8817	3.744	0.8092	1.1816	3.4771	2.2481	1.3708
AC093424.1	1.252	1.823	1.938	0.7376	0.4148	0.352	1.8189	0.4009	0.4999	1.4839	0	0.4157	0.3504	2.9307	0.4057	1.0287	0.4247	0	0.3552	0.2795	1.6235	1.0437	0.515	0	3.3451	0.1361	0	0.2784	0.1126	0.6044	0	0.616	0	4.4437	0.7993	0.2865	0	1.218	0	0.163	0.1931	0.4362	0	0.6759	0	0	0.9642	0.2446	0.4081
MIR762HG	0.9298	0.9085	2.2555	1.4992	0.9728	1.3208	1.6706	0.961	1.0159	1.6029	2.2655	2.0145	1.2872	1.5272	1.3319	0.8845	0.9627	1.3642	1.2588	0.8302	1.0153	1.1096	1.1272	0.8887	1.7672	0.8513	0.7487	0.8269	0.5809	3.3387	1.7771	1.252	1.0024	2.0008	1.3996	0.9629	0.3467	0.9249	0.4082	2.6765	1.0868	1.3638	0.5848	1.7612	1.0138	1.0014	0.7687	0.7264	1.1007
AP001893.1	3.5071	1.383	3.2169	1.2397	1.8075	2.3008	0.5307	0.6239	0.6223	0.8817	0.5591	0	0.8178	0.9121	0.5682	0.6403	0.1983	0.3789	0.4422	0.7829	0.6497	2.7287	0.2404	1.405	2.0463	0.5085	0	0.2599	1.1564	0.7525	1.6847	0.1917	0.4129	1.6596	2.3883	0.1337	0.0941	0.3249	0.3324	0.9134	1.0818	0.6787	0.3175	1.2622	0	0	0.2701	0.4567	0.8574
AC092164.1	1.5171	1.6264	2.42	0.3772	0.545	0.8625	0.8356	0.8683	0.4792	3.1112	0.6315	1.3616	0.8771	0.4475	1.5558	0.8493	0.9953	0.8106	0.227	0.8932	2.0753	1.0451	0.4114	0.3473	2.0397	0.4423	0.4646	1.0824	0.4378	0.5473	0.2306	0.7765	0.2355	0.871	1.0047	0.5569	0.1664	0.7785	0.3666	0.4603	0.4628	0.7821	0.3924	1.284	0.1829	0.7565	0.6471	0.6513	0.2174
AP005899.1	5.0565	3.7521	3.7462	3.8498	2.0619	3.937	1.0595	0.6642	0.3106	3.1013	1.4138	0.2583	2.3946	2.6706	4.5372	3.1958	0.9235	0.8826	1.6921	2.2576	4.6114	3.2424	0.32	1.3505	2.7951	2.0301	0.4251	0.3459	2.5185	1.7525	1.4574	2.0413	1.7859	5.8532	5.4631	3.5598	0.689	0.973	0.5899	1.7222	3.1195	2.6197	1.0564	3.7797	0	0.5191	0.7788	0.3039	2.1555
AL049840.4	3.1168	2.143	2.6207	2.1219	0.7649	3.2132	0.8804	0.7393	0.1844	1.7164	0.53	0.4599	0.9691	0.5404	1.2343	1.6124	0.7048	0.7858	1.441	1.5462	2.0529	2.8869	0.5698	0.555	2.0419	2.184	0.4731	1.078	1.4326	4.1237	0.1996	4.7708	0.8562	1.6716	1.9456	1.1093	0.5577	0.7701	1.313	1.0824	2.2433	0.9651	1.693	1.7449	0	0.7703	0.9067	0.6764	1.2418
AL645939.4	3.0476	1.4264	1.7971	1.4364	0	0.7345	0.4744	1.3011	1.1588	1.6888	1.8324	0.8673	0	2.9893	1.1286	1.9078	0.2954	1.129	1.9763	0.7776	0.6452	1.4518	0.3582	4.1862	0.6418	0.9468	1.1895	0.3872	3.1323	0.8407	9.2859	0	0.6151	1.4834	2.8907	3.3869	1.9631	0.4841	0.3301	1.3607	1.8802	0.8089	0.3153	0.7835	0	0.7747	1.3411	0.3402	2.1288
HOTAIR	0.9352	0.9472	1.007	0.3833	0.2694	0.3887	0.7088	0.9721	2.0346	3.4522	0.0311	1.1879	0.2048	0.203	0.5533	0.2673	1.0482	0.2109	0.7075	1.0529	0.1808	0.7321	0.669	1.3683	0.4345	0.2299	0.5776	0.3255	0.4827	13.0594	3.3048	0.7735	0.6031	1.2468	0.4776	0.6512	0.3667	0.7459	0.2467	0.0635	0.602	0.3777	0.2356	1.5951	0.2973	0.5788	0.7515	0.7942	0.4771
LINC01443	2.6803	2.0055	0	0.1053	0	0.9211	0.3786	0	0.0793	0.016	0	0	0	0	0	0	0	0.0241	0.4506	0.2659	0.0552	0.0497	0.4594	0.0199	0	0.5505	0	0.0331	0	0	0.2146	0	1.1044	1.8391	0	0	0	0.0207	1.1433	0.6399	0.643	0.3977	0.0135	0.0134	0	0.0331	0.0573	0.0291	0
AC025171.2	5.1495	3.3121	3.9022	3.3851	1.6163	2.3514	1.7578	5.0251	1.113	4.4721	2.5109	2.2366	3.5321	3.3472	6.047	1.8663	1.8255	1.4935	2.2116	3.4055	2.7829	3.5891	2.3888	6.0288	3.9808	1.6587	1.4175	2.927	2.4722	5.0216	3.1581	0.8382	2.7896	4.0236	3.866	2.0729	0.8729	3.4222	0.7634	7.3009	5.1355	1.8883	1.7175	2.355	0.4719	1.4124	1.4968	3.2066	2.682
AC138696.2	1.4233	2.0724	7.5068	3.1305	0.4192	4.2686	6.72	1.2153	6.0613	4.9073	5.264	5.0403	2.9208	7.4033	6.1491	2.079	1.6092	7.6894	1.4357	4.2364	1.4062	3.1639	5.464	2.0274	3.8463	4.9523	12.1839	2.5317	1.5359	7.6342	11.2126	3.1123	2.681	5.1188	5.0885	2.8223	0.9168	1.8462	4.497	12.6036	5.2684	6.8313	1.8898	3.5857	20.8149	2.9548	6.4301	2.5947	5.2582
AC008969.1	4.3486	3.485	12.5696	0.7937	1.9261	2.5427	1.9522	0.8076	0.3377	2.3465	3.8969	1.1412	1.5946	1.9152	3.0648	1.5669	0.8373	1.0619	1.1694	1.1948	2.5128	4.2232	0.9869	1.1707	4.3272	1.3997	0.2584	0.9541	1.722	4.5809	1.0107	1.5739	1.3607	2.7183	3.9413	2.0374	0.1635	1.2312	0.8791	2.7819	2.818	1.109	1.6499	6.7669	1.3214	1.56	1.1761	1.0004	0.8874
LINC00239	0.3311	1.6273	1.0251	2.341	0.8777	0.3724	0.7817	1.0603	2.556	0.8563	9.8821	2.1987	2.0386	1.3435	0.9657	0.5441	0.8986	0.7514	3.2568	5.7659	0.8588	0.6625	1.6344	2.9186	0.9762	2.5204	1.7189	0.2945	0.4765	9.1649	5.5355	4.5618	1.9882	4.795	0.5919	0.9092	3.8926	0.6443	0.565	0.5175	2.6557	1.7688	0.8993	1.4301	0	1.6204	1.02	2.8459	3.67
AC026401.3	6.3574	8.4271	9.7374	26.402	11.0216	8.0268	9.018	11.881	11.6854	15.1991	3.488	17.4427	9.3316	12.878	20.1333	9.1985	7.3237	7.4655	11.7068	7.6049	8.6215	14.959	6.2166	17.0439	14.985	11.2168	19.6629	16.9627	8.5435	48.7182	16.8022	8.9706	13.6415	28.6088	7.5967	8.5079	4.3654	9.6021	5.9578	3.6865	9.2502	8.2459	3.2578	13.7717	22.5128	7.6842	8.7199	10.5902	6.4517
MED14OS	1.8808	1.4121	2.0218	0.9973	1.9733	2.0492	1.8358	3.0112	1.5644	2.0265	3.823	2.4977	1.3816	2.935	1.0665	2.5112	1.8342	1.3718	1.1562	3.569	1.2195	1.8031	1.5473	0.8791	1.9494	0.9203	2.5051	4.7047	1.4377	3.8589	0.9487	2.8533	1.6607	1.2016	1.8012	1.7213	2.158	1.307	2.0056	3.5515	1.3054	2.2933	1.0216	2.1577	3.7248	3.7653	0.9415	2.388	1.5328
AC026992.1	3.235	1.3957	1.4837	0	0.6881	1.1454	1.9582	0.0512	0.1913	1.291	6.968	0.7956	1.0059	1.9445	3.0282	0.6563	0.2438	0.5437	0.136	1.4979	2.3971	0.6392	0	1.344	3.2232	0.5211	0.5892	0.8525	1.293	0.3085	0	0	0.0846	0.4763	3.4269	0.6031	0.1158	2.2646	0.1363	5.6171	0.887	1.0017	4.469	1.9836	0.7301	0.3198	0.2953	0.5617	0.8593
AC008737.1	3.9923	2.9065	7.8472	0.9408	1.2597	1.6036	1.2428	0.1217	0.1518	2.3352	0.4364	0.1893	0.6384	0.534	0.924	0.4686	0	0.5546	0.863	0.5093	3.1695	3.6133	0.4692	0.7616	1.5763	0.8682	0	0	0.9232	0.3671	0.1644	0	0.6043	0.9716	1.3108	0.3915	0	0.4756	0.3244	0.7427	1.7593	1.0596	0.3098	1.5395	1.0426	0.5074	0	0.6684	1.2085
AC005840.2	2.4136	1.0878	4.9023	1.9772	1.5232	0.4847	3.9239	0.6624	0.9178	3.6161	0.5937	1.5645	2.766	5.0219	3.7242	0.8499	0.8577	0.4471	2.913	1.6934	3.7472	2.6827	0.7564	3.9907	4.659	0.3999	1.0362	0.4089	1.5297	5.9923	3.677	0.1508	1.0554	3.4592	2.2307	0.9993	0.1481	1.4376	0.3922	0.449	2.8717	0.9075	0.4578	3.9711	0	0.9204	1.5577	1.6164	0.9179
AC018529.1	0.5861	0.9601	0.6048	0.5525	0.3884	1.1536	0.958	0.6256	0.156	0.8842	0.897	1.3622	0.328	0	2.2791	0.9632	0.3976	0.76	0.1109	0	1.5201	0.3909	0.9644	1.0958	1.404	1.4021	0.4804	0.2607	0.6325	0	0.1689	0.9613	0.8281	0.6657	0.1497	0.9388	0.2832	0.6517	0.4445	0.6106	0.7232	0.5445	9.1269	1.3712	12.858	0.2608	0.4514	0.229	0.3821
AP003733.3	1.1222	1.4524	2.316	0.7052	0.4406	0.631	1.8341	0.4259	1.6594	1.6659	1.7651	3.2703	0.4885	1.5177	2.2221	0.7171	0.5075	0.5659	0.8018	0.4454	1.0625	0.7484	0.4616	1.1656	1.7231	0.6508	1.2604	0.2218	0.6279	1.244	1.2937	0.2045	0.4844	2.6552	1.4965	0.6847	0.4819	0.3812	0.6146	1.4289	1.3462	1.6506	0.2709	0.7629	0.6838	0.3328	0.4225	0.5845	0.4877
AC102953.2	1.4684	1.6672	2.4774	5.1743	2.1159	2.6345	2.6031	2.4928	2.5871	4.6562	5.2973	1.6715	1.9763	1.3312	3.2174	1.0533	1.8738	1.1107	1.7193	0.6868	1.2435	1.399	7.0466	2.3158	2.4093	1.6575	0.917	1.8968	1.9997	19.5561	0.9674	1.6055	1.1113	11.6544	2.9821	1.1359	0.4617	1.3411	2.691	4.4073	2.4373	1.2017	1.0382	6.4049	0.213	0.6533	1.2062	1.5297	1.0599
AC025165.4	2.4433	1.4231	2.1852	0.8061	1.0793	0.4122	2.1298	1.0431	0.3902	1.7902	1.1218	0.9734	0.8205	1.5251	2.0584	0.2677	0.4973	0.6336	2.8653	1.7455	1.0863	0.6518	1.005	0.6526	2.7912	0.8502	0.267	0.2173	1.5821	2.8308	4.507	0.8014	0.3452	0.8325	1.7471	0.8945	0.3148	0.5433	0.9264	1.5273	1.5074	0.6809	0.4424	2.3743	1.4889	0.6522	1.1289	0.3818	0.7168
AC097059.1	0.7148	0.6505	0.2459	0.1685	0.5526	1.4069	1.1034	0.8393	2.093	0.9243	0.2735	2.7293	1.1002	2.231	0.6949	0.881	0.7274	0.6952	1.4197	0.4787	0.1324	0.7151	1.1761	0.8592	1.844	1.4768	0.8789	1.1126	0.5143	1.6104	0.5151	3.5171	2.0198	1.6237	0.5476	1.2267	0.4605	0.5961	1.0841	1.8618	3.1973	1.9092	0.1941	3.9235	2.6136	0.477	0.2752	2.7926	0.9321
AC011466.1	1.2647	0.726	0.7027	0.8712	0.3653	0.5744	0.901	0.27	0.1295	1.0692	0.2978	0.5814	0.4084	0.8805	1.5131	0.2132	0.396	0.2207	1.3248	0.8253	0.5406	0.7461	0.12	0.5457	1.1114	0.2327	0.2658	0.3028	0.5599	1.4402	0.6729	0.8616	0.3436	0.5801	1.1925	0.6232	0.2663	0.2704	0.166	0.3041	1.2604	0.4067	0.3523	0.6127	0.0593	0.5626	0.7791	0.5321	0.7611
LINC01942	2.8872	0.7507	5.5332	0.1944	4.3729	0.3479	0.5243	1.1446	0.4391	3.1109	11.757	0.1369	3.5781	1.1586	0.9355	1.8074	0.9793	0.4011	0.078	0.1842	0.7641	3.3008	1.3572	3.7456	20.5957	0.9867	0.7888	5.5026	0.7419	0	0	0	0.437	0.2342	1.58	0.3775	0.1328	1.949	0.391	15.4695	1.3995	2.299	0.4481	3.637	0.2513	1.4679	0.5082	0.6445	0.4706
DICER1-AS1	3.5775	2.3192	4.1065	1.9324	0.8346	2.5203	3.6351	1.0468	1.1662	6.5139	5.9595	5.7651	1.9347	2.4337	5.5095	1.6183	1.009	0.886	2.8586	1.2742	2.5615	4.2087	0.6117	2.115	6.3473	0.8829	2.0097	1.0904	1.3447	2.3932	2.9775	1.4371	0.7524	3.4924	5.5328	1.3795	0.5826	1.0055	0.5715	4.1039	1.9219	1.363	0.6696	6.4523	4.7029	1.7346	1.7954	0.7851	0.891
AL138756.1	3.5657	3.2611	1.2061	2.7519	1.3914	4.7538	1.5217	1.332	1.7953	1.8505	19.4009	1.8743	1.1974	3.0881	1.3961	2.0915	2.802	2.2539	1.9165	3.0646	1.4862	1.2286	3.7766	3.7697	1.9217	5.8932	3.1336	1.4139	2.0148	1.7978	2.0212	7.9628	4.4812	2.7082	1.548	2.3319	0.5742	2.5438	2.4616	13.1796	4.757	4.6788	9.3829	1.4598	1.4304	3.1593	1.4141	2.6582	2.7509
AC104126.1	7.44	8.2873	5.6302	0.0701	33.9836	34.1394	6.2149	16.5808	1.6635	10.0045	0	28.3563	1.3325	0.2786	1.0607	2.0377	10.8012	75.053	7.5427	5.0492	16.5387	11.2134	14.5667	148.319	0.987	0.7766	116.512	137.503	27.2449	0	0	0.0976	9.5648	0.169	4.4839	5.7877	0	50.4585	26.9676	0	40.4834	78.3769	0.0539	3.5881	3.0829	17.0788	3.2543	8.0218	1.0186
MIR3142HG	3.7387	1.4258	5.8484	5.3284	1.0421	1.4016	1.7135	0.8171	0.5923	0.4028	0.0511	2.5416	2.2917	0.639	1.0095	0.2926	0.4529	1.2119	3.7883	0.7551	0.8905	0.7421	0.2197	1.2601	13.5644	0.755	1.0214	0.2771	1.569	1.5184	4.7208	0.146	1.3519	1.3396	2.0004	0.9165	0.2007	0.965	0.5231	2.5967	5.0524	1.0337	0.1773	4.2931	0.0542	0.1584	0.7678	0.1391	1.2187
LINC01711	0.2188	0.3584	0.0753	0.6188	0	0.3076	0.2782	0.0934	0.8736	0.1415	0.0837	0.4359	0	0.5463	0.2127	0.0599	0.0742	0.3547	0.7036	0.1954	0.1621	0.1459	0.9	0.1753	0.2419	0.7138	0.1196	0	0.1181	80.9845	0.6937	0.7177	0.6183	0.9941	0.0559	0	0.9514	0.1216	0.1244	0.171	1.3499	0.3049	0	0.315	1.2	0.4867	0.0674	0.5129	0.214
AC010642.2	1.2789	1.0346	1.5968	1.2391	0.6487	1.1587	1.1785	0.4955	0.6934	1.2759	0.9515	0.9907	0.8616	1.0348	1.5809	0.6357	0.4338	0.4914	1.8635	0.4441	0.8248	1.1688	0.4286	1.126	1.2219	0.6387	0.4012	0.2949	0.886	2.4391	1.1605	0.7924	0.9034	0.8473	1.3669	0.7045	0.0687	0.4871	0.449	1.3571	1.1105	0.6711	0.5146	2.4208	0.1443	0.3582	0.6858	0.6292	0.8415
AC136475.2	9.9859	11.8875	21.7236	9.4131	3.219	7.8919	7.7437	3.6872	6.3216	27.3351	0.2065	12.3652	6.042	12.4662	9.7946	21.1402	3.4788	8.0488	9.3927	9.1581	16.7986	15.659	5.9946	7.7851	24.5661	6.691	3.9817	5.7609	4.2717	5.559	19.2914	5.8427	3.8128	11.8011	11.3032	5.5576	0.5215	7.3516	2.2512	14.3398	13.6533	4.6383	1.3683	19.1357	1.6446	9.125	4.4893	6.5369	5.9825
AL139260.1	0.7919	0.6726	1.6707	0.6718	1.1661	0.95	0.4985	0.8114	0.7307	0.9101	0.9494	1.4022	1.241	0.6261	0.65	0.4627	0.1074	0.6503	0.699	0.5657	0.9388	1.6899	0.912	0.2256	1.4397	1.791	0.2308	1.1269	0.7976	1.6311	0.3956	0.4849	0.7458	0.8994	1.1055	0.3624	0.3401	0.8511	0.9007	1.4025	0.8468	0.7356	1.0132	1.178	0.0643	0.5167	0.3252	0.9487	0.6884
LINC02352	0.4611	0.3815	0.8939	1.1854	0.4259	0.3771	1.0961	0.1253	0.5132	1.2826	1.3311	0.6401	0.4692	0.5233	1.3582	0.6888	0.1137	0.2989	1.0465	0.3743	0.4969	0.1398	0.4483	0.4926	0.6797	0.4011	0.6642	0.1118	0.5127	0.4856	1.9088	0.9349	0.2665	1.2854	0.7493	0.2302	0.162	0.2563	0.143	1.1354	0.9827	0.6814	0.258	0.9504	1.0728	0.1492	0.1808	0.5567	0.7105
AL162582.1	6.1167	3.6285	4.0522	1.2813	0.8006	3.9492	5.3482	8.8015	1.809	0.9764	0	17.1485	0.3804	0	0	0.3723	2.6127	5.2874	2.5709	0.6069	0.5036	8.0074	5.591	3.2674	3.1724	15.0756	13.2453	50.7749	6.7639	0	0.3918	0	33.1251	0	5.5539	4.8724	0.6567	4.9116	12.197	0.118	24.738	3.8934	0	2.6907	10.7677	0	0.4885	0.177	0.6646
AL442125.1	1.1329	0.7446	0.866	4.9538	0.4031	0.584	0.3772	0.1881	0.6533	1.2749	1.3726	0.397	0.1937	0.6678	1.0401	0.5343	0.1281	0.2856	0.619	0.9273	0.7695	0.8814	0.2589	0.622	0.8581	0.3422	0.1376	0.5318	0.7358	3.18	0.7981	0.4542	0.4668	0.822	0.9322	0.9072	0.2736	0.3499	0.2625	0.2951	0.9707	0.6285	0.3533	0.7702	0	0.112	0.4071	0.3196	0.6873
AC254562.3	1.6766	1.6479	3.2297	1.4224	0.7407	1.4143	5.176	0.7158	0.6248	4.2635	1.8604	4.5645	1.8768	3.1397	8.1492	1.1021	0.91	0.5435	1.0782	0.1497	0.8697	2.2363	1.2414	1.1643	2.7186	1.0209	1.3742	0.4474	0.7841	1.8346	1.8363	1.4299	0.9475	0.9521	1.1132	1.1509	0	0.3728	1.0171	2.5328	2.0688	0.3115	0.5464	2.8965	0.613	1.641	1.1362	0.786	0.8198
AC107375.1	5.6431	3.5387	14.7785	4.5595	2.2415	5.4133	10.2305	1.235	1.2875	5.0073	2.9393	4.1249	2.9991	4.3808	7.5292	3.195	1.1903	2.2443	3.7492	2.3713	5.341	5.4079	1.7555	2.9637	6.9727	3.135	1.6843	1.1809	3.207	7.6003	4.9751	1.711	2.2443	4.2817	6.1034	3.1682	0.7484	3.137	1.3305	7.1388	5.7048	2.5551	1.8031	8.7385	4.6813	2.3206	3.0675	1.8896	2.7052
AC002064.1	0.866	0.5779	0.5958	0.1361	0.6376	0.5681	0.3669	0.3697	0.6147	0.4354	0	0	0.3231	1.0811	0.0935	0.2372	0.9792	0.4679	0.2184	1.2889	0.1069	0	0.1187	0.9252	1.6489	0.1883	0.0789	0.3851	0.623	0	0.4992	0.0947	0.2039	1.0655	0.9583	0.7265	0.0465	0.4814	0.1094	0.3007	0.8014	0.5363	0	1.0389	0.7036	0	0.4001	0.2255	0.047
CAMTA1-DT	0.7648	0.7424	2.8061	0.7209	0.4505	0.7168	1.7592	0.4354	0.6786	1.6481	1.7557	1.3542	0.2854	0.7956	0.3304	0.5586	0.5188	2.1486	1.1572	0.9106	2.6446	0.6801	0.2097	0.8171	0.9395	0.5544	0.5572	0.6802	0.917	3.1177	2.4982	0.3345	0.1801	0.4343	1.0416	0.2333	0.4926	0.2834	0.6766	1.9919	1.73	0.2368	0.277	1.3763	13.3597	0.4536	0.5497	0.7967	0.1662
LINC01606	0.0239	0.0044	0.0329	0.0282	0	0	0.0565	0	0	0.1135	0.0321	0	0	0	0.0078	0	0	0.0233	0.1403	0.1496	0.0355	0.5188	0	0.0192	0.0132	0.0104	0	0.0532	0.0086	0	0.0069	0.9107	0.0676	0.2786	0.0122	0	0	0	0.0091	0.0125	0.1108	0.0111	0.0737	0.0474	0.1604	0.0319	0.0147	0	0.0039
AC104117.3	1.5697	0.7428	1.1879	0.7398	0.5547	1.8536	0.9122	0.9382	0.752	1.4883	0.1802	1.7718	0.615	1.3717	0.3052	0.9458	0.9584	0.7124	1.7814	2.8033	1.2794	1.1515	0.6456	1.0062	1.0412	0.8875	0.1715	0.698	0.5646	0	0.5429	0.5149	0.6653	0.5348	0.6414	0.6465	0.2022	1.8325	0.3571	0.0818	1.2589	0.7291	0.2842	0.9039	2.1043	0.9776	1.6923	0.6132	0.307
LINC02275	3.7793	1.5609	7.0167	0.0343	2.9752	3.5557	0.7303	2.3582	0.6319	2.3806	0	3.0403	2.8474	0.4385	2.1195	0.69	0.3287	0.644	0.2383	2.6393	3.1594	5.1216	0.837	0.8671	4.8478	1.2539	1.059	1.7453	1.3072	0	0.1257	0.8264	0.2738	0.0688	3.7244	0.4324	0.0936	5.0234	0.9277	1.1358	1.7337	2.3068	0.0263	4.6038	1.3877	2.1555	1.1119	0.9653	2.2033
LYRM4-AS1	1.8382	1.1565	1.4988	1.0696	1.1529	2.2205	0.75	2.0346	1.0269	0.7824	0.1997	0.3466	1.7146	0.8074	0.5294	0.982	0.7698	1.0593	0.7469	1.1551	0.9585	1.0291	2.2589	0.5213	1.1123	1.3325	0.3968	0.5853	0.6776	7.5518	0.7064	1.3696	3.4144	2.4356	2.2601	1.485	0.7967	1.7788	1.0669	2.1869	0.77	2.4771	0.5013	0.7678	0.1106	1.1913	0.5802	1.8972	0.7619
AC010319.3	2.0259	0.7375	2.0132	1.2731	1.1933	1.2658	1.1446	0.8649	0.719	2.2314	0.1722	0.8968	0.8819	2.6696	1.6046	0.4932	0.3054	0.7297	1.8733	1.005	0.6672	2.4019	0	0.9619	0.9125	0.7832	0.123	0	1.0526	1.304	1.0381	0.886	1.113	0.6391	0.8048	1.2361	0.5075	1.6267	0.3414	0.7035	0.9721	1.1501	0.163	1.2152	0	0.2003	0.5547	1.5828	0.587
AC084125.2	0.9728	0.7633	1.1749	1.671	0.1528	0.5227	2.1277	0.12	0.1611	0.7174	1.4226	0.6603	0.2904	1.5113	1.0087	0.2368	0.1173	0.4205	0.6215	0.1158	0.6888	0.9371	0.1778	1.1086	0.6612	0.047	0.3426	0.9036	0.6921	1.2245	0.7975	0.0709	0.4581	0.9944	1.6009	0.8211	0.0766	0.2283	0.5819	0.8783	1.3603	0.4117	0.1331	1.5794	0.1317	0.0385	0.3862	0.4391	0.4087
AC003956.1	1.1887	0.6491	2.2489	0.9805	0.3938	0.5013	0.8635	0.5075	0	0.7685	1.2507	0.1973	0.1663	0.742	0.3852	0.3256	0	0.1927	0.1124	0.2654	0.6606	4.162	0.4889	0.1587	1.7522	0.3878	0	0.5286	1.2828	0.9564	0.3426	0.7798	0.4198	0.3375	1.9732	0.408	0	0.6608	0.4507	2.9413	1.2834	0.2761	0.7533	1.8183	0	0	0	0	1.55
BISPR	6.9489	4.6669	5.7844	5.2894	6.4616	4.0834	2.5238	7.3575	5.9187	11.0661	0.1728	6.2059	6.2226	13.9665	8.1284	5.2527	4.8084	6.5774	5.8619	4.3125	5.8184	4.2403	3.7157	6.8299	10.371	3.2943	7.7078	2.8429	5.2868	6.642	8.8725	7.6128	3.7304	6.9253	4.8622	7.091	3.3346	7.5327	4.8083	1.3393	6.3233	4.8092	0.6165	6.565	4.9119	4.4516	4.206	7.9267	7.4298
AC098851.1	1.4849	1.4188	2.6815	1.8371	5.2475	1.67	1.4156	0.2377	0.3952	3.9198	1.1362	1.1092	0.7272	2.3171	0.9623	0.5083	0.1259	1.083	2.1766	1.3259	0.8252	3.0945	0.7634	0.7932	2.1888	0.5651	0.3043	1.3206	1.9362	0.3584	3.9587	0.2435	0.6555	2.8458	2.6543	0.5945	0.4782	0.8254	0.7037	2.8038	3.4352	0.6035	0.4705	2.2713	0	0.3303	0.6861	0.5801	1.1496
AC124319.2	1.4079	0.6589	0.5535	0.948	0.7997	1.131	2.7759	0.1717	0.1071	1.387	0.3848	0.2671	0.2251	0.5022	2.0855	0.7712	0.1364	0.3912	1.3695	2.6941	0.7452	0.1341	0.6618	5.0497	0.2965	0.5249	0.7693	0.1789	0.3618	0.1295	0.3478	0.2639	0.1421	1.1422	0.6164	0.6443	0	0.5591	0.0763	0.6286	0.7445	0.654	0.2913	0.7239	3.922	0.179	1.9826	0	0.2623
AC099786.1	1.1053	0.6323	0.6518	0	0.9766	0.7104	0.0574	1.0786	3.2783	0.8167	0	0.5242	0.0884	0	0.4093	0	0.1071	0	0	0.282	0.234	28.6434	0	0	1.222	0.0687	0.0863	2.1066	0.1136	0	0	0	0	0	0.0806	0.2168	0	0.7022	0	0	0.1948	0	0	0.0568	0	2.1074	0	1.974	0.1029
AL133520.1	3.7784	1.8706	2.4954	1.3535	4.8071	4.6744	2.9642	2.7101	2.7355	3.0615	1.7926	2.9103	1.6072	3.6792	2.0569	3.0631	4.4089	1.2738	2.4013	2.0244	1.3439	1.7135	3.9787	7.0239	1.838	3.1553	3.8815	2.554	1.3048	3.2103	1.5682	4.1642	2.2419	2.4031	1.0035	2.2132	1.1196	3.3607	3.5529	5.0386	3.1702	1.6146	1.423	3.7533	6.631	1.4792	2.9795	3.6606	1.8229
TRIM52-AS1	17.8011	9.1224	24.8835	12.4958	9.481	20.1978	15.567	17.5714	17.5412	14.3104	33.7886	25.9031	29.182	20.3313	14.6451	12.6897	20.2556	17.3111	13.5871	34.5536	22.0306	9.7245	9.0876	4.923	13.5386	14.7435	10.1407	16.7866	11.7169	21.1687	14.4823	16.3985	13.5551	19.1061	17.442	12.9987	5.9974	18.5282	12.3258	8.7794	13.3576	23.6323	7.9092	17.0393	51.8517	12.6932	15.1083	13.0697	7.7576
AC022706.1	3.2379	1.9461	0.9325	2.4843	0.9647	0.7198	1.2854	1.1895	1.7237	1.8499	0.0864	2.5499	2.7393	1.128	1.3176	1.4436	3.7802	1.611	3.1903	0.7396	1.0601	0.8035	1.7345	2.1721	1.332	2.5546	3.8265	1.0715	1.0564	1.7933	2.3005	1.7289	2.2872	1.6677	1.1922	2.1019	1.1883	1.7581	0.7423	0.353	2.7408	1.0143	0.2181	0.7317	2.1107	1.8089	2.7138	2.471	2.3073
AL450263.1	0.8151	0.356	1.2336	0.9988	0.288	0.4583	0.4736	0.2088	0	0	3.6799	0.1082	0.6386	0.2035	0.5282	0.2679	0.3318	0.2114	0.74	0.1456	0	0.3261	0.4023	0.5225	0.3004	0.2836	0.2672	0	0.5864	0.6296	0.4698	0.4278	0.2303	1.1109	0.9158	0.2984	0.0525	0	0.4326	1.6983	1.5085	0.2272	5.1358	0.0587	0	0	0.1506	0	0.3188
SNHG21	0.5024	0.5852	1.4515	2.273	0.6658	0.565	0.6203	0.6863	0.8023	1.1259	1.4608	1.4677	0.3936	0.5644	1.2371	0.6054	0.5453	0.6514	1.1022	0.1794	0.67	0.804	0.5786	0.9124	1.518	0.4807	0.9882	0.4468	0.7228	3.3628	0.8687	0.7909	0.5678	0.2853	0.9237	0.6896	0.0647	0.4468	0.1905	1.5177	0.7438	0.7934	0.1819	1.2295	0	0.1788	0.4023	0.471	0.5895
AC108134.3	4.8814	2.8285	7.5045	4.7892	0.8141	2.6049	6.1327	0.8081	0.3447	4.8517	0.4002	3.5389	2.0351	1.4924	5.2293	1.8007	0.2703	1.0011	4.5787	1.2454	4.2814	2.8568	0.5737	2.2882	5.0478	1.2132	1.1431	0.5316	3.2073	1.6351	5.0247	0.9803	0.9852	3.2811	3.9941	1.8463	0.4331	2.1875	0.3588	1.1676	3.3188	1.5733	0.8658	6.3462	0.1821	0.9307	2.01	0.5448	2.4843
LINC01428	19.2467	6.6095	10.3262	0.0571	6.1494	12.7971	6.6825	12.2481	28.0311	4.1215	0	1.8486	11.7882	8.6136	2.4318	0.9283	3.6954	4.0024	2.3811	11.4578	10.0458	3.7134	0.3983	4.6556	27.1217	10.7404	1.5874	15.1801	18.1142	0	2.1631	1.0323	12.9113	0.4124	9.3355	9.5275	0	14.9388	21.3874	0	23.8972	11.0202	0	22.1318	0.4426	2.908	1.8643	14.7539	1.6573
LINC01537	2.1591	1.5562	2.436	0.1221	0.4197	4.978	1.8036	0.5531	0.069	0.4094	0.1487	1.2903	0.9909	0.0539	0.3358	2.1288	0.6445	0.5039	0.7024	3.6247	2.1438	1.8431	0.8526	0.5997	1.464	1.3711	0.3775	0.1536	0.9475	25.9882	0.3236	1.4731	0.6406	0.3923	1.1469	1.5808	0.7093	0.9362	0.5239	0.2699	0.7193	0.4212	1.0477	1.5231	1.4209	4.0342	2.8864	0.7423	0.5208
AC009065.8	7.3843	3.1278	3.9717	6.5178	1.542	3.0954	10.0938	0.8598	1.215	6.1336	11.9176	4.5465	2.0288	3.3522	6.3516	2.0592	1.6395	2.5242	4.9772	1.5586	2.7856	9.4014	3.9761	7.6738	5.1455	1.4599	2.7144	5.4928	7.341	5.5308	5.1079	1.9377	1.0432	3.7359	7.2001	3.4405	0.173	2.463	1.0181	5.8047	8.8627	4.1782	4.5702	8.4079	8.5085	1.314	2.7709	2.2029	3.6325
AC148477.4	0	0.0644	0.4059	0.9456	0.5213	0.0332	0.0643	0.0252	0.0628	1.0681	23.1404	0.0392	0.0991	0.1473	0	0.0646	0.1601	0.1148	0.1562	0.0527	0.0437	0.3148	0	0	3.8922	0	0	0.7872	0	0	0.1361	6.0385	0.0417	0.0335	0	0	0.095	0.0656	0.0224	0.0615	0.182	0	20.1922	0.0212	0	0.3675	0.0545	0.0922	0
AC008735.1	2.5064	1.2485	1.9965	2.1761	0.4662	0.7418	1.7727	0.3379	0.2809	0.8528	0.858	0.1752	1.4028	1.4821	1.6243	0.289	0.4475	0.0855	0.6986	0.1178	1.2707	1.2316	0.3256	1.3389	2.2848	0.1148	0.1442	0	1.3761	1.7831	1.2167	0.7788	0.5591	1.2735	3.234	0.7244	0.2124	0.0733	0.5002	1.443	1.9532	0.5515	0.1911	2.6113	0	0.5869	0.447	0.5153	1.29
LINC02195	0	1.3099	0	3.5617	2.8614	0	0.2614	0.6145	0.7663	0.3102	0	0.2389	0.6042	2.92	0.4664	0.5913	1.7089	0.4666	9.2566	1.6067	0.2666	0	1.1841	1.1533	0.7957	0.4695	1.9663	0	1.0356	0.2316	6.0156	0.2361	0.7626	2.4522	0	0.3293	0.6954	0	0.5458	0	0.444	1.5043	0	0	8.3327	0.9605	0.4434	0.2812	2.1115
AC005332.7	3.2474	0.9955	0.8231	1.5306	0.2265	0.6728	1.3036	1.3864	0.4549	5.2301	0.327	2.0428	0.5739	0.8535	2.7691	0.5617	0.1159	0.4432	2.1336	1.5262	1.773	1.3678	0.4218	1.0043	2.3304	0.7434	1.2141	1.2161	0.9222	0.11	1.5764	1.3455	1.0866	1.0676	1.7459	2.0335	0.6606	1.0451	0.324	1.2464	1.2653	1.032	1.1141	1.6609	0	0.1521	0.3159	0.2671	0.9471
AC097359.2	3.4542	3.1112	1.9194	1.9411	1.6237	2.8638	2.0587	2.1554	2.5225	1.6414	7.0317	1.7349	2.3546	2.8472	0.6888	2.1104	1.382	1.7513	1.1559	1.2259	1.0829	3.987	4.6267	2.2	4.7653	3.8522	1.6697	1.733	2.0231	5.4159	0.9445	1.2492	2.8466	4.2752	2.8951	1.8441	0.328	1.7479	2.6697	21.7533	2.3223	2.8798	4.7629	6.0407	2.5906	1.3791	1.1731	1.7646	1.4869
AL451050.2	0.6205	0.4517	0.9605	1.0236	0.0685	0.1745	0.4507	0	0.2477	2.6743	0.7122	1.4421	0.1736	0.7746	2.7143	0.1699	0.1052	0.3017	1.8778	0.1385	0.3448	0.3104	0	0.5801	1.6007	0.3374	0.3391	0	0.558	0.2995	2.6827	0.4071	0.8766	0.6166	0.9508	0.3549	0.1998	0.1725	0.0588	1.4545	0.7656	0.2162	0.1685	0.5025	0	0.138	0.5734	0.2424	0.6068
AC108449.2	22.2326	10.6046	17.2728	8.2204	9.9059	19.2921	5.2207	8.019	8.8765	5.9475	7.9197	1.6544	12.7649	7.4172	4.4714	10.2884	3.2506	3.4792	3.6251	8.8996	11.2193	11.5036	8.1988	3.1738	12.2189	6.3354	2.4087	7.5003	5.9981	5.058	2.5411	9.0527	10.966	7.9452	15.1728	10.963	1.4815	14.9164	11.9176	12.4796	9.5775	12.9975	13.0482	4.6217	0	7.3327	2.1844	8.9848	5.6854
AC023043.1	0.3474	1.075	0.5976	3.9302	0.3837	0.2931	0.1893	2.7442	1.4797	1.198	0.4653	1.8456	0	0.5422	1.2384	0.1903	0.3536	1.4641	0.8543	1.241	0.2574	0.811	1.0004	0.2784	2.6248	1.2089	2.8477	3.2446	1.3748	2.0127	1.7024	1.0257	4.4176	4.9326	0.4436	0.7155	1.6785	0.3863	0.7245	6.606	1.6076	0.7262	0.0629	1.8757	0.2117	1.3911	0.214	2.3074	0.6229
UGDH-AS1	4.0238	2.4735	3.6039	1.8428	1.2912	3.1806	1.5442	2.7227	1.2933	2.4541	2.8467	1.2351	3.5905	1.2795	2.2633	1.6843	0.8756	1.009	0.6893	3.1186	2.5315	3.5695	1.4677	1.6425	3.9309	1.585	0.4978	1.1141	1.4884	3.6162	1.1598	2.0171	2.0111	2.0479	5.0797	1.7197	0.868	2.5112	1.4105	3.6384	2.459	2.0453	1.5121	2.6778	0.1851	1.6212	0.9471	1.5719	0.8043
AC104534.1	2.8038	2.5175	5.0151	3.3478	0.9909	3.5738	4.0733	0.3192	0.8955	3.3835	0.2861	0.9929	1.5692	3.1502	2.665	0.2048	32.716	0.6059	1.8384	0.8346	1.6621	3.2411	0.1538	3.6944	6.1305	0.9756	0.5107	2.3274	3.3619	2.5266	1.5085	0.4905	1.5844	0.743	8.4966	1.9673	0.4214	0.9352	1.0631	1.7526	4.1514	1.8233	0.0677	5.0456	10.9346	1.8294	0.5758	2.4827	1.6452
AC040977.1	33.6205	35.2555	34.3757	16.1368	21.3921	28.0987	47.3865	13.827	11.1655	53.7064	5.6647	54.6833	23.3049	30.8046	50.3721	28.553	12.5549	13.9979	22.4025	15.4241	25.3693	61.0931	14.2095	37.0718	37.0551	26.6968	46.0111	18.1057	15.5336	10.7209	30.2261	16.7945	17.4301	19.4423	43.0072	22.5832	3.0795	19.7187	10.8761	23.9399	19.5998	20.0576	10.1644	41.7406	19.5473	16.1918	21.9476	22.4121	17.2939
AP005432.2	0.3611	0.3286	0.4968	0.1702	0	0.1015	0.1967	0.3854	0.0961	1.0894	1.3124	0.3596	0.3031	0	0	0.2967	0	0.2341	0.3415	0.1612	0	0.2408	0.297	0.0964	0.4657	0.3926	0.1973	0.3211	0	1.2783	1.2489	1.5397	0.3826	0.7177	0.1844	0.2478	0	0.5018	0.3423	1.0345	0.3341	0.1677	0.4577	0.2599	9.0212	0.3213	0.1668	0.5642	0.2354
PTOV1-AS2	7.1358	4.254	9.8894	6.2879	1.7817	2.4425	12.6955	0.6181	1.2662	5.3486	5.0648	2.4721	2.3152	5.2288	8.4446	1.3029	0.421	1.475	8.0981	0.8311	5.5174	4.0692	0.7657	7.1816	6.5932	0.8996	0.3391	0.2759	5.9895	5.6581	8.346	1.0177	2.0454	5.6379	9.8245	2.2242	0.1332	1.4948	0.9411	5.4948	9.7617	2.0656	1.91	8.8586	0	0.5521	2.6759	0.9696	3.3038
DNM3OS	2.4173	2.0973	2.5514	0.7179	0.8777	5.1952	2.4895	2.0075	0.4231	2.3833	0.1394	1.2313	0.9452	0.5167	1.3948	2.104	0.7188	0.4079	2.0292	2.6612	2.4536	2.6941	1.9885	0.8844	0.8054	2.0739	0.4885	0.324	0.8815	21.6761	0.878	4.8224	2.5495	2.4257	1.6067	1.4092	0.4906	1.3622	1.4689	0.7934	1.8181	0.7844	0.3597	7.0791	1.0896	4.6845	1.0098	1.5782	0.9499
AC123768.1	1.1562	0.3683	0.9943	0.8174	0.3192	0.3251	0.4199	0.1234	0	0.8721	0.8295	0.096	0.1618	0.7217	0.281	0.0792	0.2941	0.4685	0.9295	0.5162	0.8568	0.3855	0.3567	0.4632	1.4913	0.3143	0.079	0	0.9358	1.3954	1.0831	0.1896	0.4084	0.9028	0.812	0.1323	0	0.241	0.1096	1.1293	1.5158	0.6713	0.1047	0.7803	3.1706	0	0.1781	0.3388	0.6596
AC129510.1	1.9062	1.3184	3.6719	1.168	0.6737	1.1791	3.3924	0.3255	0.9133	4.8473	0.5105	0.2531	0.4268	2.0228	2.9648	0	0.1293	0.3708	1.7306	0	1.695	1.2713	0.1568	3.0548	1.7562	0.912	0.3125	0.6782	2.4	2.6994	2.7471	0.7503	0.8079	2.9227	1.9472	0.7851	0.0614	0.5298	0.1446	1.2909	3.1753	1.0625	0.6903	2.6757	0	0.6784	0.8808	0.8936	1.2428
AC073842.2	1.6646	0.8079	1.3997	1.7435	0.6536	1.2481	3.7618	0.3948	0.1969	1.674	0.5661	0.1228	1.0352	1.3854	2.0377	0.4053	0	0.4796	1.0495	0.4955	1.9187	0.8634	1.3694	2.0748	1.9766	0.5631	0.1011	0.1645	0.998	3.9287	2.239	0.364	0.3919	2.9409	4.4399	1.0157	0.1191	0.3085	0.4909	2.794	1.7116	0.4296	0.2679	2.463	0	0	0.6267	1.3006	1.3264
AL136379.1	1.7881	0.5786	0.3417	0.7023	0.0439	0.391	0.1443	0.0848	0.0529	1.3272	0.114	0.066	0.3892	0.6201	1.5451	0.0544	0	0.4508	0.6013	0.7097	0.0736	0.265	0.2452	1.1144	1.0982	0.1728	0.0543	0.3534	0.5003	1.2788	0.4581	0.0652	0.2807	1.4103	1.0147	0.2273	0.16	0.7179	0.113	0.7244	0.9193	0.5537	0.0719	0.2145	0	0.1768	0.1836	0.4657	0.2591
HCG9	2.1159	0.6052	1.3517	0.4986	1.2685	0.255	0.4391	0.9679	0.3218	0.456	0.6939	1.5053	0.5921	0	0.9795	2.0697	0.5127	0.294	0.2859	0.5398	1.2319	1.8143	0.8703	0.4037	2.0051	1.249	0.8258	0.1344	0.2175	0.5837	0.2614	0.7932	0.427	0.6008	1.0035	0.5533	0.146	1.5123	0.2292	3.6215	0.4662	1.5444	0.3284	0.4352	2.5787	0.4034	0.4656	0.3543	0.4927
AC012306.2	5.5417	3.1176	8.6647	1.7413	2.6706	4.7217	2.6836	6.8828	4.291	5.3559	5.2044	4.6832	5.6392	2.0964	3.5913	5.5191	6.4937	5.6614	3.748	4.0488	6.9683	2.6878	9.6703	8.3425	3.8369	4.3093	4.1292	2.8378	4.1682	16.8622	5.1305	10.686	4.6262	4.3867	5.4035	7.8383	3.3533	5.1345	5.412	23.881	4.8693	6.4741	2.919	4.9561	0	8.5167	4.0348	6.4291	4.4341
AC124014.1	1.6705	1.1148	0.9577	3.4118	0.6149	0.4697	0.3034	0.4755	0.7411	0.48	0	0.3697	1.0907	0.3476	1.6238	0.305	0.7555	1.083	2.633	0.9944	0	0.3713	0.229	0	1.026	0.3633	0.1521	0	0.9014	0.896	1.1234	0	3.1466	3.6363	1.2798	0.5096	0.1793	0	0.3167	0.7251	1.3741	0.5173	0.1008	0.2004	0	0	0	0.6526	2.1781
AP003032.1	0.7639	0.6952	1.051	0	0.1687	0	1.1097	0.1631	0.61	0.1646	0	1.0144	0	0.7152	0.2475	0.4184	0.7773	2.7238	0.7224	1.0232	0.566	0	0	0.204	1.2667	0.1661	0.2087	0	0	0.2458	0.2202	1.2528	0.2698	0.2169	0	0.5243	0.246	0.2123	0.1448	0.7958	0	0.5322	0.1383	0.8248	21.4119	1.0195	0.3529	0	0.1245
LINC01311	1.684	1.0927	3.3244	2.1395	0.6469	0.9881	2.4996	0.1875	0.1949	3.124	1.7368	3.3544	1.0654	1.828	2.4673	1.3635	0.5464	1.0443	1.8003	0.6538	1.8988	1.6113	0.2409	2.2684	1.8347	0.3503	0.9601	0.3907	0.9218	4.7597	2.4057	0.8645	0.3103	1.2889	2.6924	0.6366	0.1179	0.407	0.1666	2.7078	1.7164	0.6121	0.5303	1.8709	1.16	0.456	1.0825	0.1716	1.0024
ITPR1-DT	0.8631	0.7631	1.2724	1.2205	0.5447	0.416	0.4031	1.3161	0.9846	3.1355	12.0304	0.5731	0.5521	3.2326	2.9566	0.2026	0.251	1.2791	1.7259	0.2202	1.1878	1.8091	1.1158	0.4611	3.5898	0.9117	0.539	0.7677	0.7984	2.4604	0.924	0.728	0.7839	2.9409	2.3931	0.6771	0.2383	1.6451	0.2338	3.4685	1.1411	0.4582	5.1797	4.1272	0	0.4388	0.3039	1.8305	1.5274
AC015660.3	0.5111	1.1783	2.8129	0.7227	0.301	0.479	3.0319	0.2909	0.0907	3.3041	0.1955	2.0362	0.0953	0.5317	1.8769	0.3733	0	0.3314	3.7379	0.4564	1.2624	0.4545	0.2803	1.7291	3.0135	0.1482	1.7687	0.4546	0.429	0	1.7677	0	0.1203	0.1935	1.0441	0.078	0.1097	0.2841	0.0646	1.1537	2.2072	1.6618	0.2468	1.9621	0.6229	0.1516	0.8396	0.2662	0.6109
AC017076.1	0.9152	0.1333	0	0.0863	0.2426	0.3088	0.5318	0	0	0.71	0	0.6077	0.2049	0	0.8303	0.401	0.1242	0	0.2077	0.3269	0.4069	0.7324	0	0.7822	0.6071	0.2388	0.1	0	0.1975	2.1207	0.1055	0.1201	0.1293	0.3118	0	0.1675	0.059	0.3053	0.1388	0.0953	0.3388	0	0.1326	0.9223	0	0	0.2255	0.143	0.1193
TONSL-AS1	1.9775	0.5399	0.8503	1.8641	0	0.139	0.7182	0.1055	1.5791	0.7457	0.4729	0.1641	0.2767	0.3086	0.3204	0.4062	0	0.1603	1.7766	0.4415	0.3663	0.1648	0.61	1.1884	0	0.5376	0	0.2198	0.5335	1.2728	0	0.3243	0.6984	1.9652	0.505	0.7918	0	0.2748	0.6561	1.5451	0.7625	0.5741	0.3581	0.7117	0	0.2199	0.2284	0	0.2417
MELTF-AS1	1.8577	2.164	3.3868	4.8595	0.6565	0.888	2.2265	1.6656	1.3845	6.5654	3.4117	3.7005	0.7278	1.9713	4.8758	1.7808	0.189	0.9635	6.2193	0.9124	0.6194	1.6106	0.9169	1.6374	3.8337	0.4848	1.8779	0.5783	1.9045	7.6527	7.4425	2.0108	3.215	3.1121	2.6092	0.8501	0.7479	1.136	0.5635	1.3548	2.0629	1.5963	0.2018	4.0785	5.6601	0.8264	1.4306	1.3063	1.1203
AL590096.1	1.6132	0.8319	5.4564	1.2038	0.1782	0.6804	2.9294	0.1722	0	1.5064	0.6172	2.8564	0.9028	2.4334	1.3068	0.4418	0.3648	0.1743	1.1188	0.2401	1.1953	0.4483	0.2212	1.7952	4.0622	0.1754	0.8815	0.9565	0.5803	0.3461	1.0849	0.1764	0.2849	1.7558	1.6478	0.3691	0.2165	0.4484	0.2039	1.7506	1.244	0.3746	0	2.2256	0	0.2392	0.4141	0.2101	0.7888
LINC00686	0	0	0	0	0	0	0	0	0	0	0.1219	0	0	0	0	0	0	0	0	0	0	0	0	0	0	0	0	0	0	0	0	73.3757	0	0	0.3255	0	0	0	0	0	0	0	0	0	0	0	0	0	0
LINC02593	29.6088	1.818	3.0151	1.0328	0.4052	5.7602	20.7578	2.5674	3.7709	10.8063	0.0195	5.1265	0.1426	0.8589	3.2035	6.7553	14.0364	0.7269	20.907	0.5461	12.8768	0.7477	1.5092	2.5861	0.5634	3.6573	0.2785	4.2152	9.7343	2.9194	1.2044	1.9725	1.2959	1.2444	9.4092	10.8089	0.0903	1.7706	0.6183	0.2124	6.9011	0.4971	0.0461	3.8609	17.6698	6.7788	6.6324	1.8913	0.4735
AC048341.2	10.1272	4.7061	16.7505	9.9525	1.7133	2.0598	8.7649	1.5639	4.1294	17.8303	4.6992	20.8886	3.7384	6.1868	16.198	0.8262	0.7309	2.5145	34.56	1.1545	4.3108	9.1966	0.1773	14.1572	12.7047	1.5932	8.8303	1.1498	8.7586	13.453	30.6792	1.5549	2.7396	10.2782	14.4166	2.1692	0.9715	1.7967	1.2254	11.3363	14.6224	2.2018	2.2628	13.3386	9.9788	2.4923	2.4558	2.3569	8.3584
AC110597.1	0.9327	0.6912	0.4354	0.7379	0.1766	0.6931	0.3509	1.0097	0.3015	0.5168	0.0382	0.929	0.1864	0.1248	0.7556	0.4562	0.8135	2.7859	0.252	3.0341	1.012	0.3554	0.3014	2.0107	0.3437	0.1304	6.3888	5.1551	1.5458	1.0292	0.0768	0.3059	0.2118	0.1892	1.31	1.7835	0.0966	0.5741	0.1894	0.0694	0.6371	3.9765	0.0724	1.4147	0	0.741	0.7491	0.4945	0.1086
AC008875.1	1.435	0.9022	0.4487	1.5986	0.1153	0.2201	1.4688	0.3342	0.2083	2.4176	0.0998	3.3782	0.219	0.8143	2.9589	0.1429	0.0885	0.592	2.27	0.1165	0.4833	0.696	0.2146	1.1846	0.8653	0.227	0.2138	0.3481	1.0324	2.435	3.3087	0.3423	0.5529	1.1112	1.3325	0.597	0.2941	0.145	0.0495	0.7475	0.6438	0.0606	0.2362	0.7982	0	0	0.4822	0.3058	0.893
AC083862.2	30.041	23.5166	35.9423	17.6632	18.2859	7.3448	17.2965	10.1232	40.0069	31.6106	1.7299	39.6941	17.2069	27.2177	57.0374	10.9518	37.0108	31.0705	22.2339	14.624	16.1551	13.8029	101.993	42.8282	24.5847	18.4847	34.4767	33.2415	10.5172	2.5221	29.7689	8.3047	108.159	27.0439	28.018	8.5515	23.4276	17.7054	24.342	10.9382	93.9058	13.1136	1.4553	20.7924	58.4073	27.0864	8.449	14.6794	32.8498
PCED1B-AS1	7.5417	5.0346	4.2167	15.11	5.0267	3.2669	4.6748	5.8707	8.4267	4.9962	0.3569	9.9268	10.3807	4.5078	5.7855	2.8027	8.0088	9.6405	18.0246	5.378	3.3371	1.7239	4.4065	6.6621	5.3522	7.7426	16.3234	4.5033	6.2981	5.9006	23.703	2.0978	11.0309	10.6537	5.9071	6.0607	3.9652	3.7332	3.8698	2.8596	14.7472	7.464	0.386	5.1121	11.9843	4.9318	7.0267	7.454	12.2052
AC019257.2	2.3416	0.4649	0.8787	0.1003	0.2821	0.2394	1.0051	0	0.34	0.1835	0.1629	0	0.1191	0.9301	0	0.8162	0.1444	0.138	0.1611	0.1901	0.6309	0.4259	0.3502	1.5919	1.5689	0	0	0	0.536	0	0.7362	0	0	4.4727	0.8698	1.0715	0.2742	0.2367	0.1614	2.5504	0.5253	0.0989	0	0.996	0	0	0.459	0	0.1388
LINC02086	3.7843	5.63	0.0566	11.3093	0.0606	0.0925	0.2191	1.0888	12.4085	0.5318	9.6528	0.0182	0.1688	0.6676	1.866	1.5772	2.1394	2.9157	2.0643	5.1424	0.1422	0.4938	1.7822	8.4668	1.3744	0.1551	2.7871	1.2926	0.0493	1.165	8.3148	10.434	0.7555	6.1356	0.056	2.1709	5.2108	0	3.2648	0.0857	2.064	0.5477	8.0139	0.4441	0.4679	1.2444	3.1423	2.2497	5.578
AL162274.1	3.276	1.6485	3.9109	2.0436	1.1067	2.9801	1.4698	0.4114	1.3849	0.8721	0.2212	0.064	1.456	1.0224	0.4995	1.1083	0.3268	0.2499	0.4009	0.7744	1.4279	5.3334	0.2378	0.3603	0.7812	1.2153	0.1053	0.5142	1.5251	0.2481	0.7221	0.6321	1.0209	2.4075	5.5117	0.3968	0.4034	0.6963	0.8037	0.7027	1.1294	1.9692	0.4187	1.2484	0	0.1715	0.2078	0.2258	1.0993
FOXC2-AS1	0	0.7244	0.6845	5.471	0.293	0.1865	0.2409	0.4248	3.3545	1.0006	0	0.2202	0.5569	8.4876	1.0746	0.1817	6.9747	1.0751	0.5018	2.0731	1.7202	0.4424	0	8.3265	8.1886	0.4327	1.0873	0	0	3.4155	0	0	0	0	0	0.1518	1.9227	3.503	0	0	0.2046	0	0	0.2387	69.5208	0.8853	0.1022	0	0
AC072022.2	2.2195	2.6595	5.5351	1.6999	1.0622	1.8202	1.713	0.2764	0.4923	1.9132	1.5569	1.9036	0.2588	1.0968	2.2774	2.1782	0.1255	0.5396	3.2884	0.4955	0.9594	6.0441	0.1522	0.8398	4.1237	0.4827	0.859	0.1645	1.1976	1.0715	1.7059	0.364	1.5678	4.4114	2.7395	1.5235	0.9233	0.8226	0.526	0.8671	1.3693	1.1168	0.8707	1.2648	0	0.8228	0.3703	0.289	1.1154
MMP25-AS1	7.4015	4.0547	3.947	6.7637	1.8122	3.7517	8.0115	1.153	2.1216	3.1334	0.8769	2.879	4.0199	3.2713	5.5913	1.3274	1.4261	1.9402	5.7047	3.4546	3.2993	3.3394	2.9423	9.4593	5.3529	2.597	2.0102	2.402	3.0143	4.5668	7.8094	1.9058	3.9186	6.9471	8.2912	2.6989	1.293	1.7448	1.4114	1.2395	7.7095	1.98	0.6661	7.7079	0.6227	1.182	2.0011	2.3154	4.1592
NEBL-AS1	2.7964	1.64	5.9851	0	1.1667	2.2714	0.8464	0.9286	0.5789	3.8165	0.8916	3.9199	1.3042	0.7758	2.1142	1.4466	0.6324	3.7266	0.6464	1.3873	2.1872	2.3829	0	0.6639	2.1755	1.419	2.1222	2.6253	0.5588	0.1	4.5672	4.5862	0	0.6175	2.3804	0.3555	0.1501	1.2091	0.6479	0	1.6293	1.8762	0.1688	1.9011	4.9227	2.0734	1.0049	1.8207	0.1013
AC243829.1	5.6636	0.8796	2.4936	13.2402	0.1668	0.8068	1.9199	0.129	0.7236	1.2042	0	0.1003	1.0989	0.0471	0.1958	0	0.3586	0.5385	1.5426	0.4046	0.5036	0	0.2485	2.4203	0.3061	0.0657	1.1554	0.4701	4.2376	0.1944	1.6541	0.0495	0.6934	2.187	0.54	1.1749	0.3648	0.5457	0.3722	2.0061	0.7454	0.4911	0	0.7882	0	0.1344	0.8839	0.295	4.6525
RARA-AS1	2.6006	1.7427	3.9441	1.4486	3.9425	2.7254	2.7906	2.372	2.4227	4.1012	4.0705	7.535	1.6209	4.5009	5.5156	4.7915	2.0449	2.1458	2.996	2.0056	1.927	6.2672	2.8201	6.1565	1.5682	2.3393	3.1327	2.5232	1.3607	2.2065	2.6234	2.9468	2.6302	1.846	0.7849	2.5153	1.4086	3.2856	1.2997	1.7241	2.6983	2.91	0.9203	3.7226	1.5127	3.576	2.5488	2.4936	1.1367
AL359921.2	6.2348	5.7448	13.806	2.7549	5.8527	5.9164	14.2942	1.6637	2.9042	9.6569	1.1182	5.4336	4.798	8.9996	8.4598	4.9093	2.5114	1.8947	4.7907	3.8276	6.9298	11.9541	1.9234	8.6384	7.6826	2.3728	4.2585	1.7329	3.0137	6.6467	7.7496	3.9623	4.6793	3.7618	6.4682	3.5663	1.6315	5.7405	2.5855	2.8418	5.8899	4.6155	0.635	4.4178	0.2375	1.5602	7.322	5.1758	1.7784
AC026740.1	1.8725	0.779	3.8646	1.3869	1.8316	4.1367	4.1291	0.571	0.4272	1.5564	0.2559	2.2202	1.4971	1.7532	0.6934	0.6594	0.2722	0.1734	1.7708	1.5526	2.9732	1.1596	0.5501	1.8576	1.3308	0.9308	0.8039	1.3085	0.9623	1.2914	2.0046	2.72	0.9448	0.2279	2.6642	0.5508	0.5169	0.2974	0.8114	0.627	0.9077	0.5591	0.2906	2.5513	11.2473	0.952	2.1012	1.7765	0.8284
AC002563.1	1.8767	1.0247	3.8732	0.1106	0.7254	1.7149	1.7892	0.1002	0	0.4044	2.0643	0.3115	0.7877	0	2.2803	0	0.4774	0.7604	0.1775	1.2568	1.3906	0	0.193	1.3784	3.4579	1.1223	0.3845	0	2.7847	0.755	0	0.1539	0	0.3996	0.9585	1.2881	0	0.2608	0.6226	2.1995	3.9075	2.3971	0.7645	2.0263	0	0.6262	0.2168	0.3666	0.5353
AP002340.1	0.3712	1.6215	0.5108	0.8748	0	2.0875	0.4045	0.317	0	0.64	0.2841	0	0.6233	1.3903	0.4811	0.61	0.2518	0.2407	1.2638	0.3315	1.6504	0.7427	0	0.3966	0.684	1.1302	0	0.6603	0.4006	1.6726	0.214	0.487	0.2622	0.6324	2.2751	1.0192	0	0	0.4222	0.5801	1.3741	0.5173	0.5377	0.2672	0	0	0.1143	0.8701	0.8471
AC104118.1	1.3316	0.9695	0.458	1.0356	1.4118	1.4227	2.1522	0.5401	0.5671	0.7461	0.3057	0.6631	0.708	1.5377	0.3883	0.4012	0.3613	0.4748	1.1082	0.654	1.1347	0.9324	1.4788	0.9958	1.5212	0.8398	0.4729	0.3553	1.461	1.0285	0.6908	0.7862	0.3762	0.8696	1.2242	1.1578	0.2573	0.7773	0.9845	1.3179	2.0538	0.835	0.4581	1.4857	0	0.8294	0.7178	0.9884	0.7596
AL358472.4	3.4272	2.8206	2.9728	1.1237	2.5672	2.011	1.353	2.0994	1.7451	3.5322	1.2543	3.2651	4.2532	3.9064	1.7382	3.4281	2.325	2.5117	2.9311	1.9959	2.2083	2.7825	1.9613	2.6267	3.7889	2.7868	1.2213	1.7229	2.1441	7.1934	4.5525	2.8348	1.5788	5.1617	3.6531	1.7047	0.7679	2.3194	1.0169	7.0634	4.6884	3.1838	0.5936	2.8424	0	3.0493	1.6065	4.7733	2.6716
AL117209.1	1.4055	0.7442	1.4064	1.2647	0.6773	0.7185	3.1092	0.1091	0	2.0376	1.6622	0.3394	1.0012	1.1963	1.7389	0.3499	0.0867	0.1657	1.2567	0.2282	2.3669	1.8747	0.1051	2.2524	1.7893	0.2223	0.1396	0.3409	0.8733	2.714	0.1473	0.7544	0.1805	0.9433	3.9156	0.5262	0.1646	0.2131	0.3876	0.8653	1.4189	0.3561	0.7403	2.2534	0	0.4547	0.8265	0.4992	1.0829
ZNF561-AS1	2.3458	1.3405	1.9654	1.223	1.3894	2.5572	1.9324	1.3428	1.7301	1.4629	2.7728	0.9224	1.2835	1.5787	1.1975	1.4285	2.3115	1.7332	1.0758	2.083	1.7673	0.9351	3.2234	2.8631	1.473	2.166	1.869	1.1772	0.957	2.5727	1.4278	2.4673	1.5552	2.1358	1.7804	2.1829	1.1143	1.61	1.9825	4.9901	1.9889	2.0696	1.3478	0.8726	2.7311	1.4808	1.4129	2.529	1.5934
BX322562.1	10.1836	8.3751	16.9957	13.066	19.7439	6.7871	30.8218	12.2381	2.4094	17.9625	0.3608	24.0423	8.4438	9.4171	13.1991	23.6555	6.013	35.0895	12.0563	37.0481	18.725	27.7945	13.0317	19.9461	17.0266	15.3383	8.3467	8.7218	8.819	6.1907	22.9376	17.5674	6.2609	8.6744	9.3429	10.7009	7.7744	11.8465	11.5834	11.0023	12.4489	3.679	1.8439	20.973	40.9104	7.3829	13.8256	8.1039	5.9016
AL139349.1	6.4175	1.8021	9.839	52.5431	0	2.1653	4.4618	0.2348	2.4402	3.3981	3.0166	1.5827	1.4367	7.6681	7.1295	1.0043	0.3732	1.0699	10.4041	1.3098	5.027	5.7471	1.3575	5.289	3.7839	0.319	0.3006	0.3262	4.4191	1.8883	2.9594	0.7217	3.497	9.5793	5.3379	1.4264	0.0591	0.5096	0.9038	2.5788	14.7054	0.511	1.9256	5.7413	0	0.4894	0.6778	1.4326	3.1678
LINC00671	67.0809	15.8525	191.278	0.4142	20.6612	51.6411	205.067	1.1881	0.078	29.816	12.067	55.758	22.324	1.2799	1.487	4.8404	8.1477	21.7765	1.4959	0.4796	58.1348	8.8886	1.0442	23.9669	195.099	20.2789	3.0945	6.1225	2.9329	0.1257	0.1689	0.1922	0.3104	0.1663	94.7041	13.2258	0.1101	24.2906	2.7026	1.2716	81.0218	19.7517	2.7757	65.6818	25.8231	0.3475	120.385	0.7629	0.3024
AC011481.1	3.5168	2.4536	2.8226	2.21	0	0.824	3.4061	0.2502	0.156	5.1786	5.4943	2.5297	1.1482	1.2805	2.2791	0.8026	0.1988	1.14	3.215	0.2617	2.1716	1.5636	0.2411	2.8179	7.1279	0.2549	0.9608	0.5213	1.7922	3.0182	6.0817	0.1923	0.414	1.6642	6.4363	1.3411	0.1888	0.9775	0.6667	3.6638	2.1696	0.5445	2.3348	3.3753	0	1.043	0.9027	0	2.1973
AL008582.1	0.7181	1.4812	2.1407	1.0153	0.7402	1.346	3.1296	0.3066	0.6371	3.5075	2.1064	3.4965	1.4736	1.7929	5.274	0.9178	0	0.3104	2.988	0.2137	1.0642	0.3193	0.3938	2.9408	4.3221	0.937	1.4387	0.4258	1.3776	2.7732	5.1051	0.314	0.8454	2.0389	4.5233	0.7667	0	0.2661	0.2723	1.3715	2.3627	0.7783	0.6067	2.4983	0	0.213	0.5161	0.561	1.2484
AL121772.3	1.5697	2.1141	2.0518	1.3317	1.2481	1.1475	1.4823	1.0052	1.0027	1.8942	1.9218	0.4169	0.9664	1.5677	0.9155	0.4299	0.213	0.3053	1.0094	0.7008	1.7447	1.5702	0.5165	1.5093	1.1569	1.502	0.5146	0.4188	1.5245	3.031	0.9953	1.1327	1.4414	2.2284	1.4431	0.7183	0.6067	0.349	0.2381	1.7171	1.7431	0.2916	0.3411	1.2429	0	0.419	0.7736	0.6132	1.9444
USP30-AS1	2.7417	1.8199	1.7752	3.1165	1.4961	0.5441	0.8786	0.7574	1.6312	1.3902	0.0617	2.7842	6.0475	2.114	1.9858	0.265	1.2035	3.2413	4.1485	0.7201	0.239	1.0755	0.796	3.1875	1.9613	1.8939	9.5173	2.4384	1.1023	0.2076	4.9272	0.4232	1.8227	1.8317	2.7182	1.4022	0.5714	1.0758	2.1402	0.8401	3.8803	2.0975	0.1168	0.5224	3.7345	0	1.2916	1.5121	3.4172
AC009065.5	2.3076	0.7754	1.7097	5.7729	0.3137	0.4991	0.6447	0.4547	1.2285	2.4482	0.2038	0.4715	0.4967	0.8864	1.0353	0.5834	0.1204	0.8056	0.47	0	0.9207	1.0654	0.5841	0.6638	1.7008	0.1544	0.194	1.263	1.8518	2.6279	1.1256	0.4658	0.5016	1.4112	1.6319	0.3249	0.4002	0.1974	0.4038	0.9247	0.6571	0.2474	0.45	1.0222	4.3267	0.9476	0.3281	0.8321	0.5786
AC027607.1	1.585	1.9472	3.5438	0.747	0.7002	0.6685	1.3672	0.2538	0.1055	2.9032	0.9096	0.6578	0.6653	1.484	2.5679	1.6278	0	0.3853	4.197	0.7077	0.8808	1.9819	0.6519	0.9525	2.1903	0.7755	0.433	0.1762	2.0668	1.5303	2.7409	0.6498	0.8397	0.3375	1.4166	1.0879	0.0638	1.1014	0.8263	1.4448	1.7112	1.2883	0.8609	2.2818	3.8633	1.2339	0.3662	1.2383	0.9687
AP004247.2	0.3918	0.163	0.2696	0.1055	2.1513	0.6296	0.183	0.1912	0.298	0.4101	0.0214	1.7098	0.3759	1.5024	0.1451	1.1958	0.5696	0.4355	0.1271	0.3999	0.2074	1.7919	0	1.4353	0.2063	0.6574	1.1929	0.2489	0.5437	3.1707	0.5808	0.0734	1.3048	0.6993	0.6862	0.2305	0.0361	0.4668	0.2971	0	1.4504	1.898	0	2.1154	0	0.3984	0.3793	0.4374	0.146
AL138767.3	1.4961	0.778	0.147	0.1007	0	0.6009	0.4658	0.1825	0.4551	0.5527	0.1636	0.7096	0.7177	0	0	0.4683	0.435	0.8314	0.6468	1.1451	0.1584	0.1425	0.8791	1.5984	0.5513	0.2789	0.2336	1.3306	0.1538	3.4393	0.4928	0.1402	0.4529	3.6411	0.8733	0.978	0	0.3564	0.1621	0.2227	0.5274	1.6877	0	1.2308	1.8233	0	0.0658	2.1709	0.3484
LINC02145	0.9411	0.6061	1.1454	0.2047	0.3038	0.5495	2.8	0.1082	0.1734	1.4663	0.0277	0.3605	0.5267	0.0226	0.7741	0.337	0.221	0.3051	0.4244	0.1293	1.046	0.8448	0.0893	0.7154	0.7603	0.0472	0.0791	0.0644	0.3776	0.233	0.8972	0.1187	0.0767	0.1644	0.3697	0.5797	0.0933	0.161	0.398	0.0566	1.1835	0.353	0.1311	0.0391	0	0.0644	0.3345	0.0848	0.1888
AC117500.2	0.9531	0.8674	0.3279	1.2728	0.421	0.536	0.9231	0.0678	0.1691	0.89	0.6078	0	0.0889	0.0992	1.2354	0.3481	0.2155	0.206	0.3005	0.1419	0.4708	0.4238	0	0.3394	0.4683	0.2073	0.0868	0	0.4571	0.3067	0.0916	0.2084	0.1122	0.8119	0.4057	0.5815	0.0512	0.0883	0.4818	0.4137	0.98	0.1476	0.3452	0.1715	0	0	0.5383	0	0.1553
LINC02154	0.0679	0.3215	0.0467	2.8823	0.06	0.1146	0.0494	0.116	0.2532	0.205	0.442	0.2707	0.1901	0.3393	9.0271	0.1861	0.0461	0.0881	0.1285	0.2427	0.2517	1.5407	0.1118	0.2178	0.1502	1.7141	0.6312	0	0.0733	259.968	0	0	12.6712	0.8875	0	0	0.3501	0.2644	0.1031	0.0708	0.1677	0.0631	0.0738	0.0489	0	0.1209	0	0.0531	2.1707
AL355102.4	0	2.7136	0	0.2027	0.0633	0	0.1041	0.612	0.2289	0.8032	0.7679	0	0	10.3799	0	0.0785	0.0973	0	0.1627	1.2801	0.2124	0.3824	0	0	0	0.1247	0	0.255	0.1031	0.5536	1.0743	2.0689	0.5063	4.803	0.0732	0	0.8772	0	0.0544	0.5227	0.0884	0.0666	1.9727	0.3096	1.5724	1.0204	0	3.1361	0.2337
LINC01138	2.3186	1.1369	1.6232	2.8927	3.0426	1.0507	1.808	1.6071	1.4376	2.9038	0.981	2.735	1.5496	2.6987	3.8007	1.6809	1.906	1.7066	2.9924	1.2179	0.9298	0.7368	1.4586	5.0634	2.3321	0.9847	4.1287	1.8074	2.6052	2.2649	2.1385	1.3421	1.7823	2.4552	2.1525	1.3668	0.5754	1.4027	1.3135	0.6039	4.2071	2.0842	0.3062	1.723	1.2134	0.716	1.0839	2.1632	1.7784
AC116366.1	6.6938	2.1166	5.4246	5.08	1.5537	2.5998	1.9264	0.5813	0.5436	3.4717	1.2263	0.5838	4.0321	2.3547	2.4079	1.4293	1.0775	1.3975	4.1738	1.469	2.438	2.6104	1.05	3.5302	5.4248	1.1966	0.465	0.8325	3.5609	0.8216	2.0928	0.5954	1.6028	3.4469	5.5628	3.4525	0.3563	1.088	1.0539	1.2854	5.6345	2.266	0.4211	3.1544	0.3802	0.429	1.7998	1.0194	2.5426
AC067945.2	0.6104	0.2962	0.8398	0.863	0.3595	0.2288	0.2956	0	0.2166	1.2276	0	1.0807	0.2277	0	0.923	0	0	0.5276	3.0016	0.3634	0.3015	0.8141	0.1674	0.7608	0.9747	0.2655	0.667	0	0.8782	0.3929	0	0	0.4311	1.3864	0.7274	0.6517	0.7208	0	0.3086	0.212	1.8828	0.0945	0.0737	0.5858	0	0	0.2507	0.9538	1.1938
CACNA1C-AS2	1.5635	0.3794	0.4781	0.7369	0.2302	0.2931	0.8202	0.2967	0.4624	0.8236	0.4653	0.9228	0.7778	0.1084	0.2252	0.2855	0.4714	0.5631	1.1829	0.6205	0.3862	1.7378	0.5716	0.1856	0.5122	0.3022	0.6645	0.7725	0.3125	0.8945	1.2017	0.7977	0.1227	0.4933	0.2662	0.318	0.1119	0.0966	0.0659	0.4525	1.5004	0.1614	0.0629	0.8128	1.9055	0.4637	0.1605	0	0.5097
AC017104.3	1.6614	0.5806	1.4173	0.6264	0.0881	0.3363	0.362	0.1702	0.1415	2.6064	0.0763	0.2648	0.4091	1.037	2.4117	0.364	0.6762	0.9048	0.7793	0.7714	1.9697	1.2852	0.6014	3.0174	3.4775	0.3468	0.6173	0.4137	1.6256	2.6948	3.9074	0.1744	0.1408	2.2265	0.8825	0.669	0.1712	1.0713	0.4283	0.7962	0.369	0.463	0.1444	1.1481	0	0	1.1463	0.5192	0.6066
AC016722.2	1.2684	0.4617	0.9916	0.5707	0.6113	0.5512	0.7538	0.32	0.3069	0.5964	0.5735	0	0.2581	0.4678	0.3363	0.1263	0.1956	0.3364	0.4798	0.5148	0.6408	1.2304	0.1423	0.6776	0.7224	0.2508	0.0945	0.1538	0.5185	0.8535	0.4653	0.2648	0.2036	1.2441	1.3545	0.5277	0.2228	0.1603	0.1093	0.5406	0.4268	0.2142	0.2505	0.6018	0	0.4104	0.1421	0.3604	0.545
AC010969.2	6.2541	3.85	5.2262	5.7411	4.7589	4.8243	6.8382	3.9423	2.2138	5.9413	1.5284	11.1754	3.6652	7.5623	5.3899	2.7801	4.8204	5.5619	4.422	4.035	3.2998	2.3147	4.3638	12.3837	5.2128	2.6774	6.5485	6.6108	6.9613	2.4027	6.0778	6.6375	4.2327	4.2395	3.0103	4.8847	2.0248	6.0979	3.6128	3.002	7.0299	5.4145	2.0158	5.9868	18.3169	4.2536	5.6282	5.7307	2.9567
AL354950.1	0.9313	0.4746	1.6658	0	0.1646	0.3142	3.3148	0.3181	0.0992	2.2478	0.6414	0.8657	1.3552	0.1163	0.4828	0.4081	0	0.3623	1.6206	0.3327	0.9661	0.8695	0.3065	0.0995	0.6864	0.081	0.2036	0	0.402	0	0.1074	0.3666	0	0.1058	1.2367	0.2557	0.12	0.1035	0.0706	0.194	0.8044	0.0865	0	1.9441	0	0	0.9754	0	0.1214
AC118553.1	0.4846	0.7056	1.6668	0.2284	0.3568	1.6349	0.9973	0.7586	0.5159	0.7658	0.8652	3.3247	0.9944	1.109	1.1514	0.8847	1.0958	0.9425	0.4888	1.4423	0.1197	1.0772	0.7972	0.8628	1.25	0.2108	0.7943	1.1492	0.4067	2.1833	0.9311	0.7417	0.3423	0.6421	1.0724	0.9609	0.3121	1.0775	0.3062	0.6731	0.4982	0.8253	0.117	0.6976	4.9213	1.2934	1.1443	0.5048	0.2106
AC116914.2	6.9077	4.235	6.7531	5.6547	0.9636	2.6578	8.7148	0.4657	1.3548	7.9913	6.2596	2.414	2.8487	4.5387	4.7122	0.7966	0.7399	0.4714	10.4522	0.6493	3.7715	1.9397	0.5982	3.4957	6.9668	1.5813	0.9933	0.6467	6.0159	8.6584	16.1371	0.954	1.5409	7.8453	9.0986	2.9946	0.1171	0.8084	0.6892	3.977	7.626	2.3642	1.4482	10.8605	0.4431	0.9704	2.9117	1.4203	9.3625
AP002449.1	3.348	1.625	1.2284	1.1572	1.2818	0.3765	0.9728	0.5718	0.4753	1.0582	0.7686	0	0.4997	0.8359	2.459	1.8339	0.4543	0.1447	1.0976	0.3986	1.4885	2.0839	0.5508	4.4114	1.0693	0.2912	0.7318	0.5955	1.2043	2.8733	0.2573	0.4393	3.1532	1.2675	1.71	1.9406	0.7189	1.4889	0.4231	2.5578	1.6524	1.5551	0.6466	1.7673	0.272	0.3972	0	1.0463	1.2369
AL035530.2	1.0838	0.786	0.8807	0.3741	0.4147	0.8302	0.6974	0.2842	0.2317	1.0262	0.8163	0.4307	0.5732	0.3729	1.0121	0.5656	0.3532	0.4426	0.4649	0.8916	0.6829	0.7228	0.2387	0.3556	0.7579	0.3638	0.3311	0.5693	0.5894	0.3461	0.4821	0.5486	0.3617	0.882	0.523	0.1601	0.2061	0.4744	0.2912	0.9735	0.9424	0.5986	0.4574	0.6696	0.364	0.7062	0.2234	0.1667	0.3338
LINC00115	2.3296	1.0527	4.1448	3.4076	0.6742	0.6776	1.5171	0.583	0.4276	3.9469	1.4446	1.6002	0.8093	2.1561	2.4988	0.88	0.3815	0.9895	1.5498	1.2912	1.0714	1.6608	0.5287	0.7724	2.4571	0.2795	0.6584	0.2858	1.5604	5.5326	1.2966	0.6324	0.454	2.3265	2.9951	0.5146	0.1552	0.7592	0.2741	1.6738	1.9328	0.7463	0.5818	1.648	0.5874	0.2859	0.7671	0.4393	1.1784
AC010542.5	6.6469	2.722	5.716	6.6573	2.0799	2.3361	5.8341	0.3547	1.7692	5.7295	2.5432	4.7813	2.9451	2.766	5.3845	1.0619	1.3152	1.0773	8.1718	1.2366	2.2574	3.1399	0.2278	5.4739	4.6948	1.4455	1.2107	0.9853	3.188	7.8437	9.2596	1.2718	1.3694	7.2346	3.9607	1.3941	1.6948	0.3079	0.7351	3.3181	7.0053	1.5437	0.9026	6.3794	7.7632	0.4928	2.73	2.3803	4.3335
SRRM2-AS1	1.2426	0.6755	0.977	1.4755	0.2994	0.5535	1.3304	0.2067	0.945	0.6746	0.6606	0.7393	0.4155	0.9468	1.0667	0.3447	0.2956	0.4499	0.2808	0.3603	0.562	0.6672	0.4646	0.4396	0.9158	0.3229	0.6261	0.6602	0.5805	1.2984	0.3721	0.127	0.3078	0.7698	1.2033	0.4135	0.0728	0.2243	0.3059	1.2021	0.6571	0.3898	0.2513	0.9757	0.413	0.3015	0.4474	0.3278	0.3945
AC002059.1	0.4436	1.2918	3.662	0.8363	0.3919	0.3742	4.1083	0.0947	0.5904	1.1471	1.1881	2.0618	1.1172	1.246	0.7187	0.3645	0.1505	0.4314	3.1883	0.1981	3.9443	1.6271	0.5474	0.8293	2.779	0.5788	0.7272	0	1.4361	2.1414	4.9863	0.4365	0.47	1.1336	1.1328	0.203	0.2143	0.3699	0.1682	0.6932	3.6945	1.3393	0.5622	5.4282	0	0.1973	0.4099	0.1733	1.5183
AL442128.2	0.986	0.7179	0.8779	0.6561	0.1794	0.2936	1.3904	0.1238	0.0618	0.725	1.5978	0.3081	0.6817	0.6517	2.0674	0.3813	0.1574	0.3384	1.119	0.3108	0.2579	0.3095	0.1909	1.3013	1.71	0.2018	0.3169	0.2579	0.459	0.784	1.7052	0.1522	0.2049	1.1858	1.0665	0.4247	0.0374	0.1612	0.1539	1.0877	0.9304	0.2964	0.3361	1.2734	1.6965	0.0516	0.2323	0.3172	0.4349
AC069224.1	2.4059	3.1213	6.5781	0.6687	0.5723	2.7752	1.2323	0.7638	0.9523	2.5524	5.4994	2.0071	2.2442	0.8086	2.7985	2.2978	1.674	1.3598	0.8168	0.8814	2.2855	1.1931	1.218	2.0101	4.1147	0.3488	1.4831	1.4265	0.5548	0.5559	3.3782	1.3759	0.5229	1.9617	3.8754	1.6091	0.2185	1.8175	0.2105	4.2096	1.5984	1.2608	2.435	2.5755	0.4511	2.7993	1.0641	1.0122	0.8848
AL357079.1	3.2348	2.3204	4.9744	2.6681	0.7565	2.1668	4.112	0.2437	0.785	3.7519	1.4197	4.1063	2.7423	5.9386	5.5183	0.7817	0.71	1.542	2.6093	1.9965	4.9348	3.2359	0.7827	2.1091	6.4336	0.6414	0.2599	0.55	2.2075	0.8573	4.1407	0.5929	0.6048	4.4573	8.3336	1.5456	0.3677	0.7933	0.7034	1.3877	2.9348	1.3478	0.2929	6.1807	0.4058	0.2963	1.4214	1.0407	1.1475
AL133406.2	1.9428	1.6073	1.6404	2.0395	0.7412	0.6456	0.417	0.2639	0.188	0.9515	0.9461	0.0586	0.5437	0.6064	1.1446	1.2577	0.1198	0.458	0.8018	0.8674	0.3272	1.119	0.2906	0.8019	0.6834	0.653	0.0965	0.1571	1.3342	1.5347	0.3563	0.4055	0.9981	3.1594	1.0374	0.8082	0.3982	0.3927	0.3013	0.69	1.9069	0.4922	0.4157	1.176	0	0.55	0.1632	0.207	1.3818
LINC00324	10.0613	4.5504	11.0818	8.1191	5.2303	4.8006	4.5401	8.8731	5.87	3.7231	3.5774	6.647	12.4282	5.0749	5.9934	7.9049	9.2387	5.5346	5.6706	4.22	4.7443	6.2354	6.981	5.4288	7.3218	4.0888	5.9697	4.3839	5.0268	2.355	8.8461	8.4338	8.0403	6.2906	4.8533	9.3012	2.2585	9.1525	3.1212	6.2998	9.9377	4.2013	1.8954	5.7792	1.5482	8.2738	7.6541	8.8139	4.9859
LINC00899	3.6356	2.7558	5.1788	0.7963	0.9636	2.1527	3.7205	0.283	1.1157	4.2952	8.6898	1.4484	1.4483	4.5387	3.4233	5.4589	0.5513	1.1092	1.5856	1.4705	1.5688	0.9556	0.9324	3.2215	2.8293	0.6604	0.6193	0.4565	0.7231	8.8787	4.8572	1.5853	1.1028	3.0968	2.1299	2.1628	0.2824	1.07	0.5919	7.5864	1.7548	1.8675	1.2081	2.7017	0.3128	1.0465	1.9499	0.6517	0.6414
AL049780.1	2.8126	2.7565	3.1257	0.4079	0.3823	1.46	2.9074	0.7389	0.4607	2.7974	1.0761	0.8619	1.9374	3.3761	2.3835	0.5925	0.2935	0	0.9821	0.5796	0.9619	1.8757	0.178	1.7336	3.3486	0.3764	0	0.3848	1.0896	5.9881	1.3719	0.1419	0.3057	1.9658	3.757	0.297	0.1394	0.2405	0.3281	2.3667	1.3347	0.201	0.235	4.9835	1.582	0.1925	0.7331	0.169	0.6347
ARRDC1-AS1	7.6102	3.6936	11.5591	10.2119	4.7724	5.4207	10.0803	2.7012	3.3045	9.068	24.1844	8.8182	6.915	8.1965	11.3722	5.509	5.5677	6.8493	9.0993	2.8782	6.2803	6.3888	6.3832	7.8115	5.8729	4.5301	5.9195	4.645	5.926	16.5009	7.5006	4.5812	4.8908	7.6941	8.109	6.8556	1.3072	4.0481	2.9986	16.4164	10.1448	5.9884	6.1169	8.1847	9.6748	4.3813	3.9346	3.7774	5.0588
AC022167.2	1.6418	1.1807	1.8733	1.4344	0.9729	2.2293	2.0798	0.5642	0.6395	1.3807	1.3636	0.8243	1.1206	1.8247	1.9463	1.2503	0.326	1.1163	1.0755	0.7867	1.3946	2.6438	0.6588	1.2407	2.0512	0.6967	0.6783	1.3178	1.0948	3.5569	1.3619	0.5254	0.9052	2.2967	1.8611	0.7513	0.374	0.7123	0.668	1.0012	1.754	1.2648	0.3045	2.0033	0	0.4988	0.7648	0.657	0.6005
AL161729.4	1.7781	0.4045	2.2936	0.419	0.1964	0.4999	2.5024	0	0.2366	2.3948	4.0819	1.1806	0.7464	0.9711	4.1771	0.7305	0.1508	0.4323	1.093	0.9924	0.3294	0.2965	0.3657	0.4749	0.901	0.58	0.2429	0	0.1599	3.5765	1.4093	0.729	0.157	1.8932	1.5893	0.6102	0.0716	0.2471	0	0.5789	0.1371	0.3097	2.0122	1.7599	0.5418	0	0.2054	0	0.4347
HOXC-AS1	8.5781	5.0742	16.1057	3.2007	4.1841	6.7332	4.4785	9.3846	2.854	36.8937	0	25.9872	2.0004	2.4541	7.1805	13.1172	2.9097	4.5186	2.9069	6.862	7.1507	10.3688	2.7933	4.4867	7.2443	2.7205	2.0507	9.3777	4.3072	7.5919	3.5026	5.8618	3.0297	3.5519	7.302	2.3716	2.072	5.8614	0.8809	2.5135	3.3076	5.4786	1.8768	12.3494	28.5316	7.1553	5.1195	2.7926	0.7573
RTCA-AS1	2.7941	1.5199	3.061	0.5367	0.7173	2.01	2.0947	0.9768	0.4041	3.3582	0.2501	0.7701	1.729	1.8165	3.1773	0.6815	0.7153	0.7109	0.9493	1.8266	2.1016	1.5751	1.1449	1.4756	1.9739	1.041	0.3342	0.9378	1.1682	1.6356	1.5559	0.5879	0.6629	2.0298	2.7518	0.9553	0.18	1.8698	0.4038	1.104	1.7433	1.5231	0.2405	0.8994	3.9321	0.5629	0.9126	0.9227	0.5877
AL022316.1	2.4045	1.8179	1.1452	1.5692	0.4085	0.9361	2.2168	0.6317	0.7877	2.3915	0	2.2106	2.2774	5.4261	3.3562	0.6079	2.1331	0.9593	3.2884	1.8168	1.3705	1.2335	0.9129	1.976	4.7712	1.448	0.9096	2.1385	1.3972	0.5953	4.2647	0.364	0.9145	1.6805	3.9676	3.1316	0.3574	1.3367	0.4208	11.4652	3.0809	1.2887	0.134	1.1317	0	0.3291	0.8546	1.7341	2.5323
AC024361.3	0.9531	0.5783	1.0928	1.0482	0	0.3573	1.3847	0	0	1.0954	0.2431	0.4219	0.8891	0.1983	2.0589	0.3481	0	0.206	1.322	0.2837	0.4708	1.9069	0.5227	0.1697	1.405	0.1382	0.1736	0	0.6857	1.0225	0.9157	0.4168	0	0.9021	1.4604	0.1454	0.307	0.3532	0.1205	0.331	0.784	0.2951	0.5753	2.1726	0	0	0.2936	0	0.1036
AL355803.1	13.5059	8.8085	35.2302	1.5914	4.4747	12.3416	4.7009	5.5259	2.9957	4.6082	1.9378	5.9786	8.5038	3.1614	6.1998	10.4805	8.0171	5.1077	2.3417	4.5226	10.8416	7.1306	10.1847	3.9079	11.4059	7.5876	3.3824	2.002	4.2511	0.7244	1.2976	7.7526	3.1801	4.7935	6.3232	15.1934	2.1749	9.3851	4.6941	0.5863	6.5964	10.4556	2.0379	21.469	0	7.5105	5.3737	3.5174	2.9351
MEG3	1.7994	1.0878	0.7208	1.5373	0.0624	3.3225	1.1052	0.0934	0.097	0.5772	0.1865	0.484	0.3034	0.455	0.7381	0.242	0.0216	0.0975	1.2459	0.5207	0.5468	0.802	0.5284	0.0803	1.9239	1.0105	0.0124	0.0324	0.6899	73.5161	0.6512	0.505	0.3379	2.1704	2.215	0.4482	0.0836	0.0861	0.228	0.7	1.498	0.201	0.1914	3.1381	0.2942	0.458	0.5262	0.2527	0.5094
AP000640.1	2.4804	1.1385	1.2984	0.8641	0.5717	1.3948	1.0771	0.9439	0.3158	0.8366	0.4126	0.3222	0.8148	0.5722	1.2231	0.6793	0.439	0.8041	0.3672	0.3852	1.1987	1.3306	0.5767	0.7777	1.7487	0.5629	0.2652	1.3428	1.319	1.3883	0.2176	0.2122	0.6094	0.6737	3.0295	1.1597	0.0347	1.1091	0.5111	12.8646	1.2641	1.1271	0.332	1.475	0	0.4318	0.4817	0.8426	0.4219
AC092119.2	2.6964	0.8265	3.3194	3.6453	0.4075	1.1571	3.6337	0.0606	0.1511	3.2722	3.8008	1.7904	0.7148	3.0561	3.4948	0.4664	0.1925	0.874	2.3084	1.0138	2.366	1.4669	0.1751	3.4492	5.7265	0.5247	0.8918	0.4418	2.8332	2.649	3.5585	0.2327	0.3509	2.8206	4.4576	0.8767	0.0457	0.355	0.1345	3.0678	5.3406	0.9228	2.0042	3.6519	0.2594	0.1894	1.2021	0.3326	2.4287
AC010422.2	1.3329	0.4852	1.0316	0.9423	0.2944	0.4684	3.3886	0.1423	0.1774	1.4361	0.5737	1.2169	0.0932	1.4559	1.1877	0.365	0.2261	0.324	1.0084	0.5951	0.9876	0.5556	0.1371	0.801	0.7368	0.2174	0.5462	0.2964	0.4795	0.3217	1.7287	0.6558	0.2354	0.7569	1.1062	0.4574	0.161	0.1852	0	0.6075	0.8223	0.6965	0.0603	1.4391	0.2031	0.1482	0.8725	0.2603	0.2172
AC008915.2	1.8911	0.8031	2.2406	2.2778	1.81	1.477	2.3276	2.2876	1.6219	2.4904	2.6128	3.7671	0.8232	2.4264	0.6809	1.4962	0.9266	3.6781	1.1525	1.9701	1.7905	2.1019	1.7286	2.1326	2.865	0.6854	3.674	2.5229	1.3983	4.3279	1.514	1.5163	1.3358	2.4461	1.5561	1.3942	0.5076	2.1026	0.9162	2.2985	2.5278	2.2448	0.5707	3.1006	11.0115	1.5891	1.7476	2.9551	1.2672
AC024909.1	0.75	0.6484	1.7091	0.3977	0.4348	1.0544	1.0555	0.3802	0.1996	0.2828	1.5065	0.8715	0.5509	0.3218	0.5468	0.9757	0.3816	0.8509	0.5142	0.5441	0.4863	1.0629	0.617	1.1017	0.6737	0.7951	0.5635	0.542	0.4047	0.5431	0.4594	0.984	0.3311	0.6655	0.6943	1.0511	0.1812	0.6254	0.5687	0.7081	0.6073	1.0233	0.3055	1.2653	1.4282	0.4588	0.7797	0.6226	0.4278
AL450998.2	1.4493	0.6532	2.184	1.5938	0.7012	0.6597	1.8297	0.1179	0.2204	1.041	0.1848	0.2291	0.5021	0.4738	0.9839	0.378	0.1405	0.1342	0.8615	0.493	0.9716	1.5188	0.1135	0.553	1.119	0.2701	0	0.1228	0.9185	2.2655	0.7559	0.0905	0.2437	1.0973	2.4321	0.7263	0.0667	0.1918	0.5495	0.6471	2.0437	0.5129	0.1999	1.1674	0	0.1228	0.2764	0.2157	0.4499
AP000350.6	2.1771	0.649	0.0129	0	0.2736	0.9604	0.7294	0.1522	0	0.7765	1.3644	0.162	0.3676	0	0	0.5757	0.1655	0.6814	0	0.4525	0.5146	0.9513	0.4323	0.6517	0.9199	0.4898	0.0308	0.3839	0.6009	0.906	0.238	0.2216	0.1193	0.0107	0	0.3349	0.139	0.5947	0	0.655	1.3894	0.9764	0.5301	0.5336	0	0.3674	0.1272	0.2493	0.3854
LINC01004	6.1352	2.2852	7.4599	7.2964	2.3321	3.4099	8.2394	0.9137	1.0634	10.8228	12.5285	5.0685	2.5553	4.6756	10.171	1.4458	0.7743	2.96	8.1499	1.4652	3.436	3.7585	1.5259	5.7162	8.8596	0.6516	3.8591	1.5228	6.4156	7.7603	6.9498	1.0764	2.9731	6.6439	12.7526	1.9261	0.5744	1.626	0.8385	6.0573	8.3182	1.8225	3.4101	8.0365	3.13	1.1425	2.0876	2.341	3.372
LINC01389	2.1904	0.8771	2.5617	1.4453	1.5482	0.8622	2.4662	0.7481	0.4664	4.5314	0.3352	2.1816	0.4904	2.0509	0.7098	1.4398	0.2972	0.71	1.3258	1.5648	2.11	1.7529	1.2613	2.4571	1.2108	0.4763	0.3591	0	1.1031	3.5247	1.894	1.2932	0.4642	4.3535	2.5731	1.0023	0.1411	1.583	0.4983	0.5705	1.4865	0.6104	0.4759	2.1285	0	2.1438	0.7422	0.6846	0.9282
AC142472.1	2.5522	1.4821	5.1839	1.1456	1.7717	3.8956	3.8402	1.375	0.6146	3.7714	1.767	5.891	1.1223	2.0862	3.5443	1.5644	2.2674	1.7728	3.2872	1.0853	1.4409	1.7021	0.9998	2.8241	2.844	1.9558	1.4278	2.2159	1.399	4.3808	2.2068	3.1493	0.8156	2.4846	2.8864	1.6406	0.6459	1.5539	0.6682	4.0517	2.3993	1.4677	0.7702	3.4556	20.4403	2.0546	3.8934	1.3769	0.7725
AC027237.4	1.5244	1.1098	0.3146	0.1437	0.4714	0.6858	0.4983	0	0.1623	0.3285	0.7582	0.1012	0.4266	0.0952	1.0867	0.167	0.2068	0.0988	0.0577	0.1361	0.113	1.83	0.1254	0.6515	0.1685	0.9946	0	0	0.3839	0.2944	0.4394	0.1	0.323	0.0866	1.4793	0.279	0	0.1695	0.1156	3.2558	0.5643	0.4249	0.3864	0.3841	0	0.2713	0.1878	0	0.1491
LINC02175	2.2744	1.8255	1.7442	0.6766	0.7329	1.279	1.0766	0.3741	0.4267	1.7516	1.4551	0.8417	0.7825	1.1171	2.3076	1.3684	0.4932	0.7614	0.677	1.0321	1.561	2.9341	0.5828	1.2448	1.4908	0.6243	0.3871	0.4311	0.4694	3.0359	1.0531	0.5993	0.5662	1.7574	1.8377	0.9213	0.2582	1.1089	0.4312	6.6229	1.3341	1.5413	0.5536	1.04	0.6589	0.5474	0.6087	0.5535	0.8508
AL512791.1	10.227	6.6753	18.9236	9.308	2.8041	5.751	9.2219	1.355	1.6896	5.7757	1.3493	1.8733	4.7369	4.1824	7.0847	0.9658	0.7177	0.2286	6.0032	0.6298	13.8495	6.35	1.1604	4.7095	12.7359	4.9083	0.3854	0.6273	4.8206	7.7177	4.269	2.0821	3.2384	6.0079	14.5894	3.2275	0.4543	1.1763	1.8719	6.6132	5.4391	2.6209	1.1494	15.6116	0	0.3138	4.8883	1.1021	4.8282
AC096992.2	6.9735	3.7963	5.5322	2.5169	1.3044	5.7232	3.3998	1.7703	1.5719	4.3594	2.2355	4.7973	4.4655	2.1568	3.8271	1.6862	2.3441	2.566	2.7568	2.7489	2.5604	3.8965	2.0673	2.3492	6.1352	2.8145	2.3687	2.9614	3.4803	2.4667	2.8972	1.731	2.8845	5.1017	7.0913	3.7948	0.5261	6.1118	1.453	2.749	5.5812	3.1224	1.5243	4.771	0.2297	2.9067	1.6836	2.6015	2.5599
AC002398.1	0.4955	1.1725	0.1705	1.2846	0.2189	1.254	2.2497	0.5289	0.3957	2.3493	0.3792	2.3032	0.832	2.7838	2.5691	0.8143	0.1681	0.6425	3.2804	0.2212	1.2851	0.6609	0.4076	2.9117	1.6435	0.9699	1.0831	0.8815	0.8913	2.2327	5.4273	1.1378	1.0501	2.3919	2.1513	1.3605	0.3192	0.5509	0.4697	1.1616	0.9171	0.5754	0.4486	1.6943	2.7176	1.3227	2.2896	1.1615	1.1307
LINC00460	0.025	0.1092	0	11.7002	0.011	0.0703	0.0454	4.3653	0.5057	0.0646	0.0191	0.0166	0.07	0.8582	0.0162	0.0137	0.0339	0	0.6998	4.1298	0.0185	0.4501	0.144	0.5742	0.0645	0.1522	0.041	0.0667	0.009	52.2155	0.0865	0.0984	1.7482	1.8881	0.0894	0.0343	2.3993	0.0556	0.0853	0	1.6811	0.0232	0	0.072	0.0914	1.1344	0.0154	4.7268	5.6637
SEC62-AS1	1.8346	0.8904	1.2621	0.7206	0.4052	1.3756	1.3326	0.1305	0.1628	0.9225	0.351	0	1.0268	0.9543	0.5945	1.5074	0	0.7929	0	0.5461	0.9063	2.0392	0.2515	0.3267	1.2395	0.665	0.1671	0	0.8799	1.3777	0.1763	0.2006	0.648	0.8682	1.2494	0.6996	0.3939	0.5099	0	0.3186	0.3773	0.7101	0.9966	0.6603	0	0.8162	0.1884	0.2389	0.299
SOX9-AS1	0.808	0.5834	0.712	0.5602	0.6991	0.9763	0.7009	0.975	0.4194	0.9727	0.5518	0.6518	0.3476	0.7961	0.1082	0.278	1.4586	0.5714	0.1692	0.5903	0.8164	1.4695	0.6921	2.001	1.0163	0.1046	0.4013	0.8433	0.2378	0.0559	0.254	0.9374	0.4622	0.3944	1.0879	0.6142	0.1914	0.6719	0.5874	0.0139	0.3213	0.8219	0.0871	0.8363	0.2767	0.101	0.8639	0.5582	0.1763
AC004816.2	2.6077	1.7629	4.1005	0.3512	0.9874	0.6284	3.5177	1.1133	0.1983	1.1239	0.1425	3.7103	1.8764	0.2325	0.2414	0.2041	1.5163	1.6906	1.4092	0.3327	0.5521	0.9937	0.3065	0.398	3.432	0.9721	2.6462	1.6566	0.536	109.34	1.5032	2.9326	0	1.2693	2.4734	1.1933	0.24	0.8284	0.1412	0	1.1491	0.6921	0	2.2793	9.5341	0.3314	2.4097	0.2911	0.2429
LINC00641	9.3856	8.0056	5.5017	7.4513	5.8634	8.38	5.5939	3.3353	1.2713	6.6621	9.4981	2.7534	6.6205	4.3332	9.2376	7.6254	1.6829	1.3682	2.6541	7.6041	5.8435	9.1975	3.0153	5.33	8.7935	4.5089	2.9132	2.3709	4.6015	10.867	1.9955	6.6186	1.8568	5.498	9.2847	3.7781	2.0629	5.9791	3.6358	7.0973	5.4933	4.7894	4.4781	13.885	0.0902	4.6448	2.5546	3.5002	4.0431
AL731533.2	31.6657	18.9893	27.4511	7.4192	6.5495	12.3515	11.8332	12.6596	6.2361	25.0864	0.5603	44.7257	16.1859	14.1672	35.4672	17.8464	12.0448	7.7134	10.1091	11.7682	15.1904	9.3992	2.4092	32.6568	28.0602	7.4834	21.3033	8.9537	11.0616	0.9425	18.8866	25.8163	6.8525	9.6666	21.1278	7.9571	2.9475	15.7717	4.2334	7.3416	9.5984	15.3885	1.1931	15.8765	6.023	11.5629	11.8966	5.8634	3.9977
AC012313.2	0.9168	0.4672	1.5768	0.2593	0.081	1.1857	0.7991	0.4305	0.0976	0.9088	0.5963	0.3044	0.3592	0.6295	0.6535	0.2009	1.1195	0.4161	0.5202	1.1461	0.2717	0.3668	0.6788	1.5181	0.7433	0.7177	0.2505	0.4077	0.3628	2.1244	0.3699	1.3231	0.9714	1.1453	0.6087	1.0908	0.1772	0.3568	0.3824	4.3935	0.7918	0.4684	0.166	1.8148	0	0.6526	0.2824	0.4298	0.3586
AC002553.1	4.6171	3.9376	4.2653	3.9792	3.1468	2.8931	6.0847	0.9574	0.9831	5.06	4.1387	2.9781	2.0672	3.9524	7.9505	0.7948	1.7898	1.967	5.3894	1.178	1.6617	5.2785	0.6511	5.7078	6.1252	1.4918	1.8741	1.2906	5.1249	4.1606	4.4104	1.2981	2.05	3.2212	7.007	4.3463	0.7647	2.7133	1.1004	2.2676	5.0457	2.4509	2.6751	4.4154	3.5369	1.5258	2.2755	0.8245	3.0531
LINC00235	4.0854	3.111	3.392	2.4788	1.1616	4.2514	1.4156	0.5814	0.9249	1.4369	1.2936	1.9332	1.8923	0.9673	2.1911	7.8451	0.7646	1.1264	0.7638	0.7548	1.8441	3.5387	1.352	2.7843	1.8862	1.0416	0.9494	2.5894	1.0811	5.5312	1.0827	1.2014	0.7297	2.9866	2.9739	1.0099	0.1512	1.0181	0.4629	3.0331	2.4335	2.0939	0.4591	2.0281	1.4307	1.7966	1.0848	1.174	1.5001
AC093635.1	3.2406	0.6939	2.754	0.4492	0.5895	1.1791	4.0848	0.7325	0.7103	1.8896	0.2917	2.7846	0.7468	2.6177	0.9883	0.7309	1.4225	4.3255	0.7211	0.8511	1.13	0.8899	0.4704	0.9164	1.4752	0.8291	0.8333	1.1868	0.2057	4.9079	1.4285	0.5002	0	8.7682	1.2657	0.8723	0.4912	0.6358	0.3614	4.3691	0.588	1.0625	0.1381	0.7547	6.0403	1.5265	1.1157	0.2979	0.6214
AC093249.2	2.6339	1.0387	2.567	2.276	0.4848	1.2343	2.9496	0.2811	0.5842	0.3784	0.6718	0.4372	0.8599	1.6441	0.8535	0.6011	0.4467	1.2807	0.4982	0.588	0.4879	1.6102	0.9028	1.5242	4.0443	1.0501	1.5592	2.5378	1.7371	1.8367	0.1265	0	0.3101	1.3711	3.1389	1.8079	0	1.2202	1.2483	1.1434	2.5729	1.5293	0.0795	4.8189	1.605	0	0.3381	0.686	0.2147
AC124067.2	0.1426	0.6747	0.0981	0.4032	0.063	0.3207	0.0518	0.1826	0.3036	0.1844	0.1091	0.8521	0.0798	0.445	0.0924	1.0153	0.3869	0.5546	0.1079	2.0371	0.317	0.2853	0.9384	0.1523	0.2102	1.0543	0.1558	0.1268	0.6155	7.1585	0.7397	2.3384	0.3021	0.4858	0.0728	0.1957	0.3214	0.2378	0.2703	0.0743	0.5278	0.2649	0.1033	0.3079	0.1738	1.0149	0.2635	0.2228	0.5113
FBXL19-AS1	2.7313	1.1794	2.2843	4.7706	0.7807	1.7618	2.4313	0.8231	1.6535	1.6965	3.2375	0.3912	1.3788	1.4207	3.3665	0.748	0.7993	1.302	2.7045	1.2434	1.7262	1.4286	1.7843	6.1077	1.9143	1.0948	0.7755	2.0243	3.1112	2.5164	4.43	1.1769	1.8725	3.4822	1.5317	1.4581	0.3105	1.4141	0.9848	6.8207	3.6178	2.1641	2.1721	1.7636	0.4569	0.8577	0.7836	1.4226	2.6361
LBX2-AS1	22.6417	17.759	34.8549	16.7968	16.6176	30.8884	28.5234	19.0947	24.6467	18.1601	0.2331	41.2255	15.0871	28.6141	16.2851	26.4171	27.104	40.8443	10.2741	21.3516	17.1156	16.6909	35.2893	61.2324	30.9617	28.0639	27.5175	28.084	16.5085	21.8278	15.5683	7.2934	25.2811	18.1908	23.4392	34.8693	11.396	20.15	13.9356	24.7519	21.7042	21.4815	0.9008	25.3787	10.1467	8.5821	26.1305	29.4307	17.3926
ILF3-DT	67.1699	24.9558	65.3691	10.7624	21.2113	45.6923	26.9534	13.3933	8.776	41.3203	101.758	54.9802	29.9493	38.8631	53.6949	51.3462	26.0595	26.8063	24.0772	18.2466	36.4492	48.9938	26.0265	49.731	45.7311	24.1794	23.4092	17.3195	15.6797	92.7883	37.3049	44.5542	15.5267	44.203	36.9223	38.696	5.5844	29.8069	8.8196	111.471	32.684	37.3948	27.6471	45.8731	153.58	29.4785	33.657	20.2585	15.7915
IGBP1-AS1	1.3664	1.2079	1.7457	0.828	0.4311	1.3172	1.2052	0.0833	0	2.608	0.6722	0.7777	0.6555	1.8276	1.265	0.5346	0.7945	0.7593	1.6983	0.5229	1.0125	0.6509	0	1.0427	1.5825	0.6792	0.32	0.1736	1.2639	2.7641	0.9002	0.5122	0.2758	0.3325	2.6918	0.5359	0.0629	0.3255	0.5181	0.4067	2.1676	0.272	0.8482	2.4589	0	0.6947	0.962	0.1525	1.1453
AL109976.1	0.3913	0.7122	0.6025	0.3074	0.1235	0.4086	0.4669	0.1432	0.0694	1.317	0.1069	0.3464	0.2399	0.1163	0.4951	0.1429	0.1517	0.447	0.3101	0.4992	0.4556	0.0497	0.2606	0.2389	0.5562	0.3728	0.0305	0.0663	0.248	0.2998	0.1504	0.5989	0.1843	0.1693	0.2569	0.3411	0.144	0.6733	0.113	2.4556	0.4713	0.2337	0.6275	0.3957	1.0219	0.1326	0.4477	0.1747	0.3037
ZNF337-AS1	2.0661	1.6328	1.8831	0.8573	0.9673	2.0159	1.4303	0.4373	1.1751	1.271	0.8851	0.2111	1.4133	2.6785	2.2774	0.6094	0.587	0.3664	0.7949	0.8673	1.7142	1.531	0.6392	1.8395	1.4512	0.9678	0.164	0.5183	1.2578	1.6482	1.6287	0.4866	1.3597	2.7678	3.6438	1.0182	0.4607	1.1191	0.7432	1.4074	1.5252	1.5831	0.729	1.1822	0.495	0.6599	0.4732	1.3935	1.0707
AC138089.1	0.2188	0.4779	1.129	0.1031	10.2461	8.3672	0.0795	0.6539	0	2.6877	0	3.6323	0	0	0	1.2585	0.1484	1.7023	0	7.2296	0.0811	2.043	0	0.5844	0.0403	0.1903	5.9184	1.8488	0.0394	0	0	0	3.8641	0.0621	7.5995	0.2503	0	2.0071	2.1985	0	0.27	1.8295	0	0.6694	0	6.1327	0.674	15.643	0.0357
AC015727.1	0.8265	1.3539	1.2794	0.3896	0.639	1.162	1.1257	0	0.22	1.603	1.344	0.5488	0.4626	1.4188	1.0713	0.3396	0	0.6698	0.3908	0.9226	1.0718	1.7914	0	1.9868	0.9899	0.9886	0.1129	0	1.7096	0.665	1.9058	0	0.2919	0.8214	1.6886	1.0401	0.1997	0.5743	0.1567	0.7535	2.0397	0.3839	0.449	1.1155	0	0.5516	0.3183	0.3229	0.5389
STPG3-AS1	5.1001	1.4264	7.4452	0.9967	0.4946	0.8744	8.1096	0.0531	0.0331	1.8228	3.3316	5.534	0.9747	1.087	2.6199	0.511	0	0.3629	0.6823	0.3332	3.18	2.3228	0.1023	1.329	3.6443	0.1894	0.7137	0.0553	0.2461	0.5204	0.6454	0.8976	0	0.6711	3.7484	0.5692	0.0401	0.242	0.0472	1.6199	0.7674	0.2311	0.1126	1.9251	1.2886	0.166	0.9579	0.1458	0.1419
AC099850.1	1.4233	1.9285	2.5023	0.6708	0.8732	2.0898	0.6605	1.7554	1.4311	1.6699	0.9076	1.5751	1.5046	0.839	1.2298	2.4688	1.1801	1.0765	0.7478	1.977	1.5233	1.1074	1.4961	0.5491	1.3987	0.9629	0.4321	0.5626	0.6542	2.6465	1.3674	2.7492	0.7819	1.841	2.0192	1.1579	0.5093	1.8022	0.6596	1.1121	1.2195	1.212	0.3722	1.2806	1.5418	3.3769	1.3883	1.9151	0.9537
SLC9A3-AS1	42.1755	63.7546	27.8918	5.1118	13.9091	128.782	157.832	18.1972	2.1904	70.521	15.5378	98.0005	9.2992	5.6532	77.0544	3.3318	6.4475	2.1602	3.8828	2.4362	2.8832	12.0053	0.6991	16.9267	45.5059	10.6892	12.7935	21.5597	7.8592	11.9037	8.8301	6.6455	3.254	2.9208	127.817	2.7732	1.6853	8.3912	5.2907	12.6621	24.2673	6.0349	0.9961	75.6151	2.7799	8.098	12.0064	0.8037	1.9974
AC244035.1	1.8472	1.5282	3.8125	0.8706	1.4095	1.5109	0.9149	0.932	0.2682	1.3752	0	2.7876	1.4098	0.9434	2.5031	0.184	0.4557	0.871	2.2234	0.7498	2.862	1.6799	1.7959	8.3425	4.5176	0.7304	1.6517	3.1365	1.0873	0	2.0329	0.1102	0.4745	0.6675	1.7154	1.3064	0.0541	4.6677	0.7004	0.6123	4.8693	3.4321	0	1.9341	0.614	0.4482	0.569	2.2305	1.2591
AC010531.5	0.9404	0.4279	1.6174	0.2216	0.8309	0.5288	1.4516	0.2007	0	0.608	0	0	0.2632	0.1467	0.3047	0.1288	0.1595	0.1524	0.3557	0	0.3484	0.7839	0.1934	0.5023	1.8194	0.2045	0.1285	0.2091	0.5074	1.3619	0.4066	0	0.6643	1.6021	1.561	0.3228	0.0757	0.2614	0.3566	0.4899	1.1603	0.4368	0.6811	1.1846	0	0	0.2897	1.2858	0.3832
ZSCAN16-AS1	1.898	2.1859	5.2679	1.6195	3.3754	3.4135	4.1954	3.2832	2.6566	4.4074	7.963	9.2781	2.848	2.8596	2.6827	2.7156	3.33	6.3646	2.3149	2.1916	2.8491	4.0701	4.4688	5.2616	3.8348	3.1597	7.5368	3.6526	2.7192	5.3606	3.5086	4.0037	2.3115	2.1277	2.6324	3.534	2.0921	3.0107	2.0968	8.0969	2.675	3.0932	2.767	3.4921	67.9182	3.6395	3.1047	3.0937	2.2241
ERVK13-1	4.3186	2.3916	4.7358	2.4312	1.4227	2.8073	4.0586	0.7485	1.0955	3.4402	3.6118	1.3602	1.7663	2.5574	2.8107	1.5871	0.5947	1.0589	2.269	1.2937	2.0034	3.9878	0.835	4.9588	3.5638	1.6616	0.5143	0.7879	2.2804	4.3894	2.6596	1.6708	1.3102	3.1755	5.8866	2.2296	0.2913	1.0721	0.7137	5.7201	3.5922	3.1546	1.2631	3.6732	0.1912	0.8128	1.3985	1.7376	1.7537
AL132780.1	2.6992	1.4952	3.2294	2.2402	0.9591	2.1118	1.2574	0.7766	0.6247	2.1496	2.0206	0.8572	1.6092	1.2087	2.9281	0.7071	0.6369	0.3804	1.798	1.2575	1.5218	2.7393	0.1931	1.6299	3.0922	0.6891	0.3527	0.3131	0.8865	4.1546	1.4206	1.5397	1.3678	1.6661	3.4764	0.8055	0.4725	0.6198	0.5339	1.1309	2.6426	0.9267	4.696	2.0485	9.0821	0.7831	0.9218	0.9169	1.3198
ZBTB11-AS1	3.3556	2.6957	5.8906	1.9997	3.2372	4.2944	3.0538	1.729	3.203	2.9423	7.0096	3.8415	3.4323	2.9371	2.6995	3.6338	1.9624	2.7256	3.5308	0.861	1.5433	2.8551	5.0132	8.7356	3.9087	2.3821	4.8473	2.0582	2.4419	5.71	2.0232	3.2387	5.8576	3.8767	3.6049	4.2888	0.7577	3.7522	3.4951	9.1415	5.9487	3.5472	2.0252	5.5526	4.6066	2.162	1.2712	3.3751	1.9614
AC022144.1	21.2263	12.7235	17.4127	11.4246	9.0218	9.1875	49.7817	3.5449	7.4856	18.7006	0.2562	51.5304	9.6313	37.1565	24.7344	13.2407	4.2246	11.2001	16.591	4.1257	14.2894	20.3628	7.822	53.9028	39.0121	6.8149	12.4399	6.6105	7.1538	0.9482	8.7233	1.8888	4.0677	9.4681	26.0256	8.2731	1.0998	7.8914	2.615	1.7789	10.1622	7.2468	0.1455	34.4863	19.3405	3.5746	11.0967	2.8251	3.6888
AP003419.3	0.8185	1.6388	2.534	3.4722	0.3616	1.1507	4.5336	0.2621	0.2179	2.5577	2.8186	5.1633	0.9162	3.1933	7.0286	0.3363	1.1106	0.9287	2.6319	0.1827	1.5163	0.6824	0	4.919	2.2623	0	2.0127	0	1.3986	1.3172	3.1849	0.4027	0.5782	2.3241	1.9858	0.7491	0	0.2275	0.2328	3.6243	1.7674	0.5703	0.5928	2.8724	11.7215	0	1.9541	0.4797	1.134
AC005911.1	1.3921	0.7601	0.7981	1.0935	0.41	2.2179	5.2244	1.0896	0.1235	0.9999	1.9529	2.6189	0.7791	1.8826	1.0525	1.0167	0.787	1.0529	2.2819	0.6215	1.0315	0.7736	0.1909	1.859	1.9665	0.8073	0.3803	0.619	1.4188	12.6936	2.6748	1.9786	0.8194	1.3175	0.8295	1.274	0	0.3869	0.6158	2.2962	0.7157	1.1854	0.4201	2.0041	3.3931	0.6193	1.2149	0.3625	0.605
TMEM44-AS1	20.4789	15.6378	17.5304	5.0933	5.8935	13.279	10.8538	5.8668	2.1306	26.3923	6.6103	19.1788	9.4829	6.2457	20.8366	14.031	7.1953	8.5629	5.1225	6.731	5.8325	7.2068	9.6033	13.7543	13.6923	6.1508	8.7114	6.2295	5.543	24.8173	5.9217	6.8266	6.2198	15.2659	15.7402	7.9976	2.0839	7.157	4.6284	29.1534	9.5887	8.0249	2.5364	14.8131	14.7147	7.7751	7.6027	6.5669	4.8274
LINC01507	13.9955	9.7574	24.1523	0.559	11.4219	19.4753	2.24	6.4815	3.4095	6.8498	3.7211	8.0329	10.3554	8.884	4.1506	17.2813	16.8971	3.6909	0.3589	13.9803	8.0854	10.4409	10.9279	6.3356	23.6023	7.2221	5.3143	9.7048	6.9117	0	0	1.0893	3.8539	3.3676	19.0212	12.0489	0	16.8791	2.968	37.193	5.5611	11.2385	11.9402	11.1841	0.2891	8.0202	2.4843	7.9694	1.7785
AL133367.1	4.7131	2.891	7.3804	2.7245	0.8167	2.6503	2.44	0.8227	1.206	3.2882	7.1931	1.4005	1.1659	1.9341	3.3243	1.3835	0.265	0.7259	0.9062	0.7441	3.2029	2.6395	1.3495	1.1406	4.8938	0.9966	0.2134	0.6021	1.1146	3.0001	1.441	0.7858	0.7541	2.011	5.2399	1.0009	0.4277	0.6369	0.5627	5.5883	1.6225	1.0885	1.4804	4.3391	0.1587	0.556	0.8823	0.8952	0.9592
MCF2L-AS1	0.2972	0.4327	1.4311	0.07	0.1969	0.2507	0.3238	0.8247	0.2373	0.2562	49.1202	0.9866	0.499	0.5565	1.5407	1.2209	0.2016	0.3853	0.8994	0.3981	0.9909	0.5946	0.7334	0.635	1.3689	0.1293	0	0.6608	0.3207	0.0956	0.9422	2.6319	1.7843	0.5063	0.1518	0.272	0.5264	0.826	0.169	0.3096	0.3667	0.4141	10.3851	0.9091	0	2.3797	0.2289	0.1161	0.8719
AC010864.1	1.3303	0.8666	2.0713	0.99	0.3402	0.5906	1.4241	0.2093	0.1491	2.2331	0.2143	1.8597	0.7446	0.743	0.9983	0.3452	0.4275	1.0894	0.6357	0.8753	0.6226	0.7471	0.2304	1.5709	1.1611	0.5786	0.6504	0.1868	1.0578	1.352	2.5428	0.3215	0.3462	1.3519	1.2874	0.4806	0.0677	0.6228	0.2389	1.3495	1.5119	0.7155	0.3043	0.9324	0.5973	0.4984	0.3667	0.7112	1.0499
AC011445.1	1.2231	1.3357	5.89	3.4588	0.8104	1.3756	4.22	2.6109	0.6511	3.6899	1.6379	10.1515	1.0268	3.4355	3.5668	0.335	2.0743	4.3612	4.3954	1.0922	4.5314	0.8157	1.0062	4.9	2.479	1.0639	5.0123	3.2634	1.7599	13.3833	2.8201	3.2094	0	1.0418	1.5617	1.3992	1.5757	1.6998	0.2319	4.4598	1.8864	3.4086	0.6644	3.0814	111.795	0	3.9559	1.9112	1.5948
MIR503HG	6.6585	4.6937	10.3249	2.0424	2.599	6.3594	38.7828	1.5492	2.7757	11.312	4.0843	4.3511	4.9097	18.1641	7.8311	1.6596	1.9837	2.7865	12.3142	0.9438	3.8113	4.887	1.623	15.2811	7.9585	0.3831	0.8085	2.2874	4.3722	6.7349	4.8334	1.4329	1.518	5.7018	2.3032	6.3196	0.261	3.5057	2.1239	11.7083	5.1729	0.7037	1.0334	15.7355	4.5942	1.724	5.9904	1.6791	1.2403
ADIRF-AS1	3.313	2.8207	5.5841	3.8083	0.9432	2.246	2.8477	0.6915	0.5683	3.9822	19.0422	7.8828	1.1022	2.6884	4.4372	3.0145	0.7866	1.1694	1.8869	1.4957	3.6687	7.9663	0.5754	2.1729	10.0724	1.2088	0.8649	0.5075	1.7082	2.3694	4.6259	0.7607	1.0661	2.3622	7.1727	0.6233	0.3083	1.9134	0.5932	6.5771	4.8259	0.9575	3.166	10.8773	0.5832	0.9335	1.3834	1.1217	1.818
AC004253.1	1.5176	3.4724	3.2812	3.2698	1.3408	1.5849	7.4014	0.4628	0.2308	8.0356	1.7419	4.1746	1.5774	2.5711	8.5703	0.3563	0.1471	0.2811	3.1984	0.5808	3.8554	3.0362	0	2.5478	6.2316	0.2829	0.5923	0.3856	2.7295	2.9304	3.7491	0.8533	0.7657	2.9547	3.2111	0.6944	0.5586	0.8436	0.2466	1.1293	2.5412	1.2084	1.0206	7.8027	0	0	1.8031	0.6775	2.3321
AL121601.1	0.6491	0.4725	0.893	0.7648	1.0035	1.2775	3.6539	0.1386	0.3455	2.7974	4.2217	5.1717	0.1816	1.6205	0.8413	0.3555	0	0.6312	0.8593	0	0.7214	1.0821	0.5339	0.6934	2.2723	0.1412	0.532	0.2886	0.3502	10.6533	1.8707	1.7032	0	0.9215	2.1548	0.4455	0.1045	0.5412	0.2461	4.3953	1.2013	0.7537	0.3526	2.1024	3.5596	0.8662	1.9993	0	0.1058
AL590652.1	0.8232	0.8465	0.6371	0.2522	0.1273	0.2893	0.5232	0.3251	0.1862	0.9668	1.1574	0.5876	0.4607	0.2826	0.9736	0.1127	0.363	0.1868	0.0934	0.4043	0.6252	0.5901	0.2032	0.6706	0.7129	0.1253	0.2811	0.3478	0.3405	1.9736	0.3677	0.4455	0.1018	1.2154	0.7673	0.2448	0.232	0.3432	0.1326	0.6432	0.3682	0.2581	0.1639	0.6147	0.1003	0.293	0.2916	0.5627	0.114
GK-AS1	5.688	1.4198	4.0249	3.217	1.5076	2.1933	6.1975	0.6244	0.4326	0.9105	3.0468	0.2158	1.7281	0.913	1.7904	0.4451	0.5512	0.5268	3.5656	0.5805	1.5655	2.9263	0	1.9098	2.5752	0.7775	0.444	0.5782	6.8982	1.6737	0.6558	0.1066	0.1148	7.5675	5.8932	2.3054	0.2617	0.3614	1.2323	2.0317	3.9101	1.7362	1.2947	1.5792	0	0.723	1.3016	0.5079	2.7018
AC090844.2	2.1927	1.1174	1.8102	0.1033	0.339	0.9864	0.6371	0.3276	0.0584	0.8505	1.9296	0.2912	0	0.4106	0.071	0.5405	0.1488	0.5686	0.1244	0.2937	0.4062	0.0731	0.2706	0.5856	1.4141	0	0.4193	0.39	0.0789	0.0706	0.948	0.6473	0	0.1245	0.7839	0.6522	0.0353	0.1828	0.0416	1.5419	0.4058	0.4074	0.1985	1.0654	0	0.2926	0.9794	0.3426	0.6075
MGC16275	1.2917	0.8816	6.1092	1.3127	0.3745	1.3619	0.4398	0.9478	0.5157	0.5393	0.0618	0.4556	0.8359	0.5291	0.4447	0.4201	0.4108	0.7327	0.6413	1.1174	0.5683	0.5384	0.8966	0.9703	1.3983	0.6671	0.397	0.4667	0.392	1.0393	0.2094	0.5561	1.055	0.7564	1.505	0.628	0.13	0.8751	0.2755	2.3549	0.6226	0.4125	0.307	0.7554	0	1.6521	0.5098	1.4192	0.6579
LINC02363	1.7918	0.6381	1.5275	1.9645	0.0516	0.2848	0.5942	0.0665	0.1244	0.6547	0.775	0.1293	1.6569	0.1216	0.4039	0.0853	0.37	0.3536	2.7702	0.4522	0.7216	0.0779	0.1282	0.3953	0.1723	0.5252	0.447	0.0693	0.3363	0.3009	0.4042	0.1278	0.5228	0.2433	2.9047	0.2674	0.138	0.1949	0.2511	0.4464	0.6969	0.2352	0.0564	0.2243	0.0949	0.0693	0.6599	0.0913	0.4063
AC018809.1	1.7218	0.9053	2.5007	2.9756	0.3381	0.4303	2.7794	0.0817	0.4074	1.4842	1.6836	1.0163	0.1071	1.1942	1.8597	0.3144	0	0	1.7369	0.3417	1.2758	0.8931	0	2.2483	1.974	0	0.2091	0	0.9635	0.862	1.4337	0.3765	0.4054	1.0864	2.8336	0.2626	0.0616	0.2127	0.1451	1.5945	1.4163	0.2666	1.3163	1.6525	0	0	0.5304	0.299	0.8731
AP001625.2	3.8639	4.0186	2.0253	1.0406	2.1133	2.3797	5.4128	1.6496	0.4897	3.5685	0.352	4.3982	4.634	2.5266	2.2655	2.318	0.7489	1.1929	1.1136	4.929	5.8625	5.399	1.2109	2.9485	3.797	4.0813	0.4021	1.6364	1.3237	0.1184	1.5909	2.0519	1.0397	1.0448	7.7058	1.0945	0.5333	1.1251	0.8371	0.3834	2.3837	1.111	0.1999	4.6355	3.1393	1.3097	0.9068	3.4501	1.0796
TMEM9B-AS1	3.8153	3.3105	3.9289	5.5417	1.3462	2.132	1.4031	1.1167	1.8522	4.1885	3.4061	0.7966	2.3368	3.2502	1.9283	0.8806	0.9442	1.5401	0.9168	3.0641	1.3335	4.0327	1.5792	1.4356	5.4294	2.0351	0.7605	1.3018	1.9508	2.4712	1.5215	2.4714	1.1695	3.0387	3.3458	1.12	0.9042	1.534	1.4921	1.9249	3.0495	1.4601	3.7017	6.7363	0.6726	1.6439	0.5691	1.4623	0.5475
AC008982.2	1.073	1.7967	2.805	4.2481	1.1376	4.3443	4.3647	0.3665	0.7997	0.8324	2.299	0	1.0809	1.6074	2.2251	1.0579	0.2912	0.2783	1.2177	0.5749	1.5901	4.2934	0.1765	0.9171	2.0561	2.2401	0.3518	0.1909	1.9299	2.3482	0.6185	0.8447	0.9095	3.1684	4.8226	1.0802	0.1382	0.2386	1.8714	2.4593	1.1915	1.1961	0.6994	5.7154	1.5692	0.5728	0.5949	0.503	0.6995
LINC01871	6.0953	6.3394	5.6909	18.4682	6.7315	1.9586	4.7438	5.9481	17.8462	9.0069	0.3332	24.5725	7.5538	16.0338	7.0537	3.3387	8.8608	13.8308	30.1393	9.3306	4.8391	2.0325	6.4469	9.0701	5.6155	7.7639	26.4065	11.6166	10.0233	4.764	13.0504	1.9993	7.3809	12.1146	4.4473	17.1337	2.1033	7.7449	1.8158	4.9894	17.1902	13.1447	0.1577	11.7522	10.0815	9.297	2.0117	6.8033	20.295
AL355607.1	0	0.3916	0.9869	1.3522	0	0	5.3404	0.3062	0	1.3911	2.3327	0.2381	0.6022	0.8954	1.3945	0	0	0	2.442	0	0.5315	0.9567	0	0.1916	0.793	0.4679	0	0	0.645	24.9306	0	0.7058	0	0.2037	1.6485	0.3282	0	0.1994	0.272	0.3736	0.2213	0.6663	0.3896	0.5163	0	0	0.4419	0	0.2338
AC139887.2	3.488	1.9952	4.3006	1.9856	1.2707	2.1016	3.4879	0.88	1.4589	2.2159	1.5859	1.143	1.7874	1.9369	2.8182	1.1538	0.8297	1.2041	1.765	1.254	1.7958	3.8216	0.8385	3.2667	2.4372	1.2807	1.1139	0.7655	2.0043	3.3385	1.8018	1.0847	1.3599	3.4727	3.7249	1.6169	0.5033	1.1584	0.7986	3.6457	3.4235	1.557	1.0007	1.7363	1.2698	1.1688	1.7303	1.5573	2.023
AL121820.2	0	0.4141	0	0	0.1675	0	0.1377	0	0	0.1634	10.301	0	0.4245	0	0	0	0.2572	0	0.2869	0.3386	0	0.7587	0	0	0.1397	0.1649	0	0.3373	0	6.8341	0.4372	31.8412	0	0.646	0	0.1735	0	0.2108	0.1438	0.5926	0.7018	0.1761	0	0.4094	6.9321	0.3374	0.2336	0	0
AC009093.4	1.1315	0.5492	0.3892	0.9777	0	0.2121	0.137	0.161	0.1004	0.4064	0.938	0	1.2666	0.1177	0.4889	0.2066	0	0	0.642	0.3368	0.559	0.7546	0.1551	0	0.7645	0.4921	0.103	0.1677	0.4749	5.4624	0	0.2474	0.5328	0.9638	0.289	0.4315	0.1215	0.1048	0.143	1.2771	0.4654	0.438	0.478	0.4751	0	0	0.2324	0	0.3688
AC021851.1	1.4608	0.8181	0.9277	0.9004	0.3475	0.5371	1.3264	0.5037	0.2692	2.8332	0.301	1.1565	0.5346	0.9469	1.7841	0.3385	0.1143	0.4735	0.6589	0.7526	0.791	1.7236	0.4622	0.5102	1.2423	0.3421	0.307	0.0999	0.5659	1.2296	0.7449	0.8846	0.6747	0.9891	1.5496	0.6171	0.3257	0.4997	0.2556	0.3219	0.8319	0.548	0.2442	0.9909	0	0.2	0.6577	0.6146	0.348
CHKB-DT	1.7573	1.2609	3.3115	1.0924	1.4401	1.7043	1.1285	0.5111	0.9355	0.933	4.463	1.1161	1.0263	1.0333	0.7922	0.6836	0.6566	0.6109	1.0405	0.9097	0.6794	2.0891	0.6495	1.4285	1.4923	0.4763	1.4612	2.2652	0.9436	3.918	1.7617	0.5681	0.7016	2.0682	1.7821	0.6177	0.2707	0.4955	0.5214	3.7279	1.8069	1.7035	1.4941	1.3291	1.3347	0.2039	0.5413	1.1143	1.154
AL589669.1	75.7998	22.9638	61.6676	0.1987	37.2706	26.9417	77.64	20.9646	36.9109	13.9577	0	68.6159	23.9835	46.4805	10.7441	13.8913	37.5542	18.9919	31.597	37.5758	50.5445	12.3214	10.8069	11.5204	19.9338	27.3157	42.7233	69.9151	66.7391	0	11.0552	0.553	6.2028	0.8776	68.7453	23.5956	5.3396	38.8572	27.3811	2.4152	51.7473	58.2123	0	31.9585	7.8766	15.0011	26.3783	38.4758	0.5038
AC073389.3	2.3762	1.1121	2.1018	0.64	0.6498	1.5271	1.6849	0.3865	0.4216	2.8285	1.0823	2.0286	1.0766	0.9888	1.5399	0.8677	0.3838	1.1737	0.8561	0.8083	1.593	1.811	0.5585	2.2364	1.6679	0.4429	1.1129	0.9057	0.6105	2.3306	3.3265	0.8165	0.5595	1.8634	1.3292	0.3624	0.1093	1.0693	0.2145	3.2418	2.4432	1.3139	0.3688	1.9955	0	0.8054	1.6382	0	0.6639
MMP2-AS1	0.8648	1.1018	0.7272	1.7663	0.5306	0.7835	0.9423	0.0615	1.1765	0.1657	0	0.0957	0.4571	2.0393	2.5843	0.1053	0.7497	0.4672	9.2147	0.4719	1.78	1.1215	0.3557	0.231	1.7351	2.6539	1.3389	0.1709	2.99	0.7113	28.111	0.0315	0.8824	3.9016	1.0306	0.6156	0.294	0.187	1.3116	0.4755	2.2527	0.1785	0.1044	1.5044	0	0.0855	0.37	0.4129	0.8614
LINC01983	0.4488	0	0	0	0	0	0	0	0	0	0.0429	0	0	0	0	0	0	0.0727	0	0	0.0831	0	0	0	0	0	0	0.2993	0	0	0.194	0.0736	0	0	0.0573	0	0	0	0	0.0584	0	0	0	0	22.9707	0	0	0	0
NECTIN3-AS1	1.7205	0.9572	0.7817	0.2601	0.1864	1.004	0.3419	0.3881	0.6048	0.7835	0.2484	0.1509	0.4179	0.2432	0.1893	1.6715	0.2643	0.5262	0.086	0.4348	0.1924	0.8227	0.3205	0.3295	0.981	0.3953	0.2483	0.1444	0.327	7.7939	0.131	0.575	0.5274	0.6268	1.0777	0.4159	0.0209	0.8121	0.2092	0.6426	0.2604	0.2714	0.1763	0.3155	0.1978	0.4333	0.12	0.1015	0.1376
AL691432.2	13.549	8.1256	17.678	5.0647	8.9665	12.1438	8.9368	4.8759	3.8412	8.9942	9.7324	11.0647	6.9439	6.837	5.3827	10.0376	4.7543	8.5485	5.9501	8.0659	7.3085	9.2435	5.6798	5.4628	10.3877	8.196	3.6024	4.4323	4.7992	23.1558	8.1095	10.9997	2.7868	8.5195	10.5524	7.4116	1.0366	9.3212	4.9009	14.3859	8.4549	9.2351	3.4214	11.7893	13.2859	5.7274	5.6447	7.8279	3.486
AC008759.2	1.9396	0.8344	2.4261	0.8311	1.2463	0.6941	1.8572	0.0753	0	1.2159	0.0675	0.9366	0.3947	0	2.1711	0.1932	0.5981	0.1143	0.9338	0.4724	0.1307	0.588	0	1.4128	0.6498	0.2301	0.1927	0.3136	0.3171	0.227	1.6263	0.1157	0.1246	0.3004	0.9906	0.4841	0.2272	0.196	0.7354	3.8577	0.5439	0.4914	0.447	0.7615	1.2894	0	0.5431	0.2755	0.2874
AL356481.1	1.3297	0.8622	1.5151	1.3122	0.4222	1.3319	1.1168	1.0467	0.6194	1.4686	0.6996	1.2692	1.0931	1.0634	1.131	0.7739	1.2968	1.0507	1.3676	1.0761	1.1701	1.0531	1.1281	0.9545	1.5926	0.9398	0.4995	0.9979	1.2407	1.2838	0.8384	1.4993	1.0273	0.8259	1.3795	1.6924	0.0803	1.2474	0.898	1.6884	1.7432	1.0037	0.3611	1.4956	2.4309	1.8486	0.9088	0.6818	0.6502
AL512625.3	3.4708	1.357	1.5919	3.09	1.4197	1.8072	1.6341	1.2074	1.9161	0.7202	3.7872	1.6218	1.4389	0.4814	2.166	3.239	1.3081	2.0002	2.6746	3.2141	0.762	0.6001	1.692	9.1329	1.7528	3.0751	0.9131	1.2576	0.9711	12.4942	3.1864	2.0239	3.3597	4.745	1.8384	3.1177	0.4554	3.6446	1.5597	1.741	1.824	2.0301	0.8845	1.3417	0.6267	2.9738	2.4155	3.3144	4.4419
AL121583.1	1.0859	0.7906	2.3478	1.7547	0.5482	0.6979	3.1551	0.3311	0.3303	1.9389	0.8903	1.339	0.5209	1.1619	1.2064	0.5098	0.421	0.4023	1.6431	0.4156	0.3448	1.0345	0.6381	1.7402	1.7722	0.8771	1.1867	0.6898	1.0602	0.4992	1.2519	0.5088	0	0.6166	2.2977	0.5679	0.1499	0.8624	0.2353	0.8081	1.2441	1.5852	1.7976	2.1216	1.1343	0	1.2424	0	0.8091
AC008074.2	2.552	1.4742	1.5648	1.4643	3.9947	3.8061	4.7552	1.9422	3.4849	0.8369	0.1486	2.8365	1.0867	0.8311	0.4674	1.0028	3.2367	8.6321	4.638	1.4862	1.2332	0.703	3.1947	14.1655	1.4311	6.6598	9.7611	52.549	5.528	0.3928	0.7995	1.2738	4.7809	1.1342	2.0401	3.935	0.3931	2.6523	4.5014	1.3004	16.5997	5.8753	0.1808	1.6772	0.6761	1.0859	1.6405	2.0372	1.501
AP006545.2	0.6885	0.3342	0.6315	0.5408	0	0.6453	1.0002	0	0.2443	1.7804	1.5805	1.5238	0	0.573	1.4872	0	0	0.7439	0.6077	0.4099	0.5102	0.3061	0	0.3678	1.4377	0	0.627	0	0.2477	2.6589	0.7937	0.6022	0.3242	0.2606	0.3516	0.21	0.1478	0.1276	0.4351	1.7932	1.2742	0.3198	0.4155	0.9086	0	0.4084	0.1414	0	0.5237
AC129492.1	2.6977	1.5584	1.2911	0.8845	0.2073	0.7255	0.3195	0.7762	0.1249	0.2275	0	1.7523	1.2473	1.2446	1.1022	0.5782	0.0398	0.2661	0.3993	1.99	0.8691	0.3129	0.0965	1.3157	3.3282	0.7652	0.4166	0.2608	0.1266	0.6795	0.6085	0.5386	0.1243	0	2.0667	0.322	0.0189	0.7172	0.3113	0.0611	0.3256	0.2996	0	1.4353	0	0.6783	0.5058	0.2749	0.975
AC005393.1	1.8116	1.2529	1.8694	2.3054	1.2004	1.0187	1.7107	0.5414	0.5786	3.3573	1.1783	1.9246	1.1153	2.8269	2.935	0.2977	0.1229	0.5872	1.8503	0.1618	2.282	0.9665	0.7451	2.1289	1.4687	0.394	1.5838	0.1611	0.7168	2.7985	1.5664	0.2377	0.2559	0.7201	1.8505	0.829	0	0.6042	0.6869	0.9437	1.1176	0.6732	0.8528	2.608	0.2208	0.4836	0.7812	0.1415	1.122
AC005479.2	1.4728	0.7148	0.6755	1.2726	2.6024	1.1043	0.7132	0.6288	1.3067	0.8464	0.7513	1.7929	0.1374	0.9193	1.4317	0.9412	0.6661	0.1591	1.0214	0.8768	1.8189	1.9644	0	0.5245	1.6282	0.5338	0.5365	0	0.883	1.106	1.415	0	2.0807	1.5333	1.3791	0.7863	1.344	0.2729	0.2792	0.6393	1.0601	1.7102	0.2667	1.5902	2.3933	0	0.8317	0.7671	1.9204
AP000487.1	0.8593	0.3628	0.804	0.5346	0.4555	0.6378	0.6491	0.4402	0.1464	0.874	0.4734	0.1598	1.2119	0.6865	0.6905	0.5272	0.2332	0.2674	0.5461	0.2762	0.4839	0.8252	0.3959	0.661	0.6967	0.299	0.1315	0.2446	0.4698	1.9912	0.7331	0.4284	0.3399	0.9955	1.0358	0.4404	0.2325	0.4395	0.3519	0.5013	0.8906	0.6546	0.1743	0.4701	0	0.2447	0.2118	0.4565	0.493
HOXC-AS2	3.9149	1.8248	6.8316	1.0801	2.9104	3.866	2.1848	3.4243	2.3128	6.6256	0.0183	5.6744	0.8016	2.5628	2.5989	2.0921	1.5222	1.7643	1.4448	1.7905	3.0777	5.4126	1.9245	3.8254	1.8121	1.5989	1.513	1.4862	2.3528	4.1178	5.6692	2.2863	1.8548	2.3316	3.365	1.4637	1.3839	1.9905	1.2852	1.3429	2.0618	1.7962	0.6224	4.0036	0.64	1.3168	3.9707	1.7905	1.4162
AC100797.1	1.674	0.4875	1.1516	0.9468	0	0.9413	1.5808	0.2859	0	0.8658	0.2562	0	0.7495	0.209	4.3394	0.3668	0	0	0.6332	0.299	0.4962	0.8931	0.2754	0.3577	0.6169	0.4369	0	0.2978	0.2409	1.5085	0.772	0	1.8919	0.9506	4.1039	0	0	0.1861	0.7616	0.5232	2.0655	0	0	1.446	0	0	0.3094	0.5232	0
AL035413.1	20.9578	15.1112	14.418	7.7883	13.264	30.823	5.1965	9.6359	11.0494	6.7744	3.2383	1.3381	20.1884	14.8427	2.8731	7.2852	4.7848	5.8791	1.3722	9.1774	19.1131	32.1195	8.2889	7.2122	23.6152	7.4501	2.5326	17.9228	10.801	3.5022	2.6718	5.5523	6.1209	7.3239	24.084	7.0083	0.7139	21.3968	16.0451	4.8287	13.7998	12.3555	2.0433	15.2309	0	5.0204	1.8001	12.9107	2.4305
AC079921.2	4.1854	1.3543	7.0384	3.6165	1.7462	2.6151	2.0268	2.2832	1.2378	1.403	1.0676	1.2351	2.6027	1.4514	1.9589	2.4199	0.9464	0.3015	2.4628	2.9069	1.7229	4.8071	1.1477	2.1115	1.5424	1.0113	0.5082	1.6544	1.4219	3.592	0.8042	0.9152	3.1207	2.9049	1.9001	1.064	0.2247	1.4219	0.2645	1.5746	3.4428	2.16	1.0946	1.8411	0	1.0344	1.3609	1.8167	1.8949
AP000866.5	0.2377	0.6058	0.8178	0.2241	0.105	0.6685	0.4317	0.203	0.1266	3.2789	0.2729	1.8943	0	0.5936	1.2326	0.6511	0.1613	0.1541	0.4497	0.4246	1.057	0.4757	0	0.254	1.4894	0.8272	0.9094	0.2114	0.2566	0.3061	0.6852	1.8716	0.1679	0.405	0.9714	0.1088	0	0	0	1.7338	0.1467	0	0.1722	1.8825	0	0.4231	0.2197	0.1858	0.155
AL390067.1	0.763	0.2777	1.3559	0.3296	0.2528	0.3218	0.508	0	0.1692	1.0687	1.2893	0.4644	0.1423	2.2621	0.3708	0.0348	0.0431	0.371	0.3848	0.3406	0.7538	0.3392	0.9938	0.3396	0.7263	0.1936	0.2779	0.5089	0.5946	1.1049	0.3665	0.0834	0.1347	1.0831	1.2015	0.3491	0.041	0.3534	0.7232	1.8215	1.6474	0.502	0.4835	0.778	0	0	0.2742	0.0497	0.1865
AC245100.7	3.3999	1.5652	7.3609	1.791	3.9756	4.1611	2.2517	5.9342	2.0228	4.87	2.9077	10.2916	6.6599	3.745	4.277	4.2724	10.447	10.0486	3.1775	2.0538	1.1855	0.4001	2.9614	14.2086	3.3534	2.914	11.1465	8.1822	2.1583	2.9608	4.1503	3.6079	3.3905	3.6342	2.1961	3.2489	0.4831	3.0018	1.744	4.5317	5.3054	3.3442	0.3983	5.9383	6.0934	2.4022	3.4191	10.2348	2.0862
SLC16A1-AS1	2.8041	1.2607	1.4009	2.8242	1.1502	0.9151	1.3397	0.5166	0.8086	1.8632	0.2714	1.1859	1.093	2.4692	4.1374	0.8091	0.6171	0.7142	1.9763	0.8123	1.5583	1.4972	0.5698	1.538	3.2384	0.3013	0.8345	0.3192	1.9273	2.4871	3.5359	0.5968	1.91	3.1752	1.7348	1.1037	0.3897	1.0067	0.8733	0.4869	2.2654	1.6203	0.1209	1.4117	1.0476	0.7054	1.1491	1.2911	1.216
AC131009.1	0.745	3.7065	1.7085	16.1532	0.3291	1.9552	0.7216	0.6362	8.0646	1.9266	2.6606	2.4735	1.5289	1.2401	1.7704	0.2721	0.5054	0.644	2.3487	4.4353	1.2882	0.3312	0.4086	0.796	0.9152	0.216	0.1357	0.4418	0.3573	2.5576	1.8611	2.4438	1.228	4.0899	1.9026	0.7955	1.2798	1.2425	0.4708	4.9159	1.2257	0.8075	0.8094	3.7541	0	1.1048	0.153	1.7463	1.2953
AP003498.2	98.1274	9.0813	127.831	0.3919	1.4694	47.2307	14.7322	12.6234	0.3935	6.7301	2.0151	46.1984	13.2903	0	16.8261	1.2653	2.8834	14.0174	7.7595	0.8251	24.3054	10.3522	13.302	4.837	53.7992	19.3303	30.4948	24.9824	42.8435	0	0.0533	10.6076	6.6573	0.2624	49.5987	7.4839	0.2381	7.1398	15.7649	0.0481	49.9352	6.0085	0.0669	66.3441	1.9143	3.9461	9.4778	3.2486	7.2288
AP000866.1	2.1651	0.7844	3.5219	0.5484	0.5631	1.1834	0.8598	1.257	0.6786	2.0407	3.7239	0.5576	1.3307	1.0294	1.4424	1.3633	0.8099	0.4591	0.7004	0.9757	1.042	1.8217	0.4911	2.0861	1.8679	1.0561	0.8071	0.8998	0.5823	1.0029	0.9798	0.8429	0.8433	0.7067	1.4365	0.7593	0.5148	1.8448	0.3107	1.1225	0.724	1.1513	0.9269	1.2344	0.4685	1.2152	0.8072	1.2252	0.3991
AC090152.1	1.5016	0.7553	0.9016	2.7152	0.4342	0.3992	0.9916	0.373	0.3198	2.5652	0.0313	0.3807	1.742	0.5453	0.3539	0.7627	1.1484	1.5399	1.3323	1.5603	0.3237	0.091	0.292	0.5834	0.3823	0.4987	1.641	0.777	0.4321	10.4914	1.7627	0.3761	0.7521	0.6667	0.8227	1.3868	0.8002	0.5919	0.3727	0.1422	1.7181	1.3823	0.0099	0.2555	0	0.8502	0.7401	1.9412	1.1748
AC023669.1	0	0.147	0	0.0952	0.7135	0	0	0	0.3224	0.3481	0	0	1.13	7.9396	1.1776	1.2165	0	0.1309	0	3.4255	7.1811	1.0772	0	1.7256	0.5208	6.9374	0	2.1548	0.4358	0.2599	0	66.7548	0	0.4586	0.1031	0	0	1.0101	3.3683	0	0.2491	2.157	0	1.09	0	0.8982	0	0.3155	0.0658
OBSCN-AS1	1.4245	0.5684	1.9977	0.7489	0.5688	0.5392	0.8556	0.1403	0.3792	1.2633	0.1991	0.3456	0.7053	0.9405	1.1895	0.2251	0.0743	0.1598	1.4508	0.3914	0.5887	0.475	1.1268	1.3902	0.9994	0.4408	0.3293	0.1462	0.7489	0.5642	0.6159	0.2696	0.5805	0.84	0.7975	0.3134	0.0971	0.3655	0.5297	0.7991	1.2675	0.3436	0.0198	0.5028	0.6343	0.1706	0.1688	0.1498	0.3572
AP003352.1	1.7553	1.0262	1.2808	2.5321	1.1749	0.688	1.3523	0.4769	0.5946	3.0031	1.0786	1.9425	0.7442	1.4609	2.6887	0.4953	0	0.3448	1.6298	0.5225	0.8671	2.2348	0.7001	1.307	1.8033	0.347	1.1916	0.4731	1.3011	2.2596	2.085	1.2213	0.9393	1.8727	1.9017	0.5111	0.5653	0.9166	0.3428	0.7758	1.5423	0.9883	0.8283	1.8761	0	0.4733	1.0158	0.3325	0.7456
AC092667.1	0.9	0.4021	0.5348	0.0578	0.4157	0.5982	0.4012	0.5415	0.1742	1.0403	0	0.652	1.0533	0.2809	2.7043	0.4482	1.3877	0.5039	0.0929	0.2557	0.6972	0.191	2.5242	2.9721	1.176	0.3025	1.6319	1.0188	0.9124	0.395	0.0943	0.1342	0.3179	0.2556	2.0686	0.9548	0	0.6141	0.3102	0.6819	0.1514	0.9121	0.0148	0.9571	0.698	1.0556	0.1134	0.4795	0.3067
AC004846.2	0.5446	1.0904	1.3114	0.3209	0.3609	0.536	2.4726	0.0581	0.2175	1.3497	0.4689	0.8137	0.1524	0.6799	0.7942	0.1492	0.1847	0.2648	0.3606	0.4863	1.0089	0.454	0.224	0.2909	1.7562	0.1184	0.2976	0.1211	0.5878	3.8562	1.0204	0.1786	0.3847	0.3866	1.4604	0.1869	0.0439	0.3785	0.1549	2.8371	1.092	0.3162	0.2465	1.0781	0	0.1211	0.5452	0.4255	0.7545
AL122125.1	2.8212	1.4121	3.5179	1.6621	0.3895	1.5865	6.9805	0.1506	0	3.2678	0	1.9904	0.4934	4.6226	6.6277	0.1932	0.1196	0.5716	0.667	1.1022	4.0503	1.2935	0	1.4128	3.9637	0.4602	0.3854	0	1.2051	5.9018	1.9312	0.9254	0.3737	1.2016	5.8538	0.4841	0	0.6862	0	1.4696	1.6317	0.0819	0.3193	2.0942	0.2149	0.6275	0.4345	0.2755	0.4598
AC103706.1	2.1814	1.0209	1.9295	9.3266	0.9636	1.4895	2.8295	0.4657	0.5806	2.8204	3.7558	3.3107	0.9592	4.4738	3.8371	1.7069	0.3171	0.9091	4.0669	0.9739	1.6164	4.676	0.6409	1.9143	2.4116	1.3554	2.0433	0.8315	1.6815	8.1235	3.7723	0.8177	1.3207	4.2471	1.2733	1.0695	1.104	0.2599	1.3588	1.8668	3.9411	1.9541	3.8368	2.9722	7.5957	0.9704	1.1519	1.3391	3.7078
AL596244.1	3.2755	3.2917	6.6061	1.0556	2.8816	5.2897	2.1251	2.5817	2.0716	4.8867	6.5554	2.3051	2.7263	1.6601	2.5037	2.4996	2.393	2.0328	2.0122	4.2749	2.3441	1.9044	4.6522	1.8693	4.2712	2.9954	2.7688	4.6313	2.2558	3.4418	2.1625	2.9201	2.7092	1.6693	1.7301	1.6782	0.4328	4.0775	1.8894	7.4083	2.8325	4.8894	2.9096	3.3352	0.8871	2.6155	1.5091	2.6904	1.5879
AC005034.4	0.4707	0.8139	1.2954	0.0555	0.3639	0.6618	0.3847	0.3015	0.1253	1.2173	0.4953	1.0158	0.7245	1.4691	0.6864	0.838	0.5589	0.2289	0.2671	0.8407	0.5232	3.2178	0.8713	0.1886	0.9975	0.2047	0.9646	0.7327	0.1693	1.515	0.2713	0.0772	0.2494	0.8019	0.9617	0.2154	0.0379	0.6542	0.1785	0.4291	0.363	0.1093	0.0426	1.7366	0	0.3141	0.29	0.5517	0.2302
AC018647.2	11.562	5.8409	11.8186	4.0366	8.5459	11.1903	4.6567	6.6785	8.6089	6.351	5.9272	3.4622	8.5152	6.4465	3.5424	6.9403	7.4506	4.9482	3.64	6.2307	6.7941	9.0546	13.6973	6.7817	9.3941	7.3515	2.5876	3.6294	3.706	18.4187	6.2438	8.2789	6.37	18.4813	12.3379	8.4492	3.2694	10.3203	6.9242	16.2574	6.8999	10.2494	3.4846	9.0297	1.6885	7.6202	5.1056	6.6521	3.966
AL049552.1	3.6671	3.2037	3.5319	2.9383	1.134	2.5777	2.464	0.3914	0.1952	1.4224	2.5255	0.6087	2.6681	2.0601	1.0694	0.703	0.4976	0.4755	1.1791	2.1285	2.8531	2.4456	0.6033	1.8609	1.8919	1.4355	0.1002	0.4892	2.7042	2.2424	0.4228	0.3609	1.4247	1.7701	0.8428	0.6712	0.8858	0.6116	0.7647	2.7698	4.2985	3.066	1.66	1.7158	0	0.1631	0.7907	0.8595	3.4667
ASB16-AS1	4.8865	3.7154	5.7288	4.9333	2.6057	4.5526	5.9963	2.6541	1.9856	4.86	11.3836	4.1853	4.4016	6.1543	8.3384	2.6449	1.6673	4.274	4.9329	3.2016	3.1709	4.2422	3.4252	6.7495	5.4661	3.9991	3.0492	3.0602	4.4204	8.6727	5.3669	2.959	4.4933	5.5498	5.8923	3.3607	0.9499	2.5718	2.4776	15.3326	7.0638	4.7274	6.1881	7.8361	2.7133	2.444	4.195	3.1627	4.6938
AC112484.1	1.1323	0.681	2.2692	1.6938	0.435	0.5537	1.3768	0.4834	0.7338	0.9124	0.1884	0.3269	0.5786	0.9526	0.5424	0.6742	0.6012	0.4468	0.838	0.4396	2.0793	2.1997	0.4455	1.2886	2.8483	0.2141	0.2421	0.2189	0.3719	1.1408	1.5041	0.2261	1.5301	0.8107	1.0812	0.5181	0.3013	0.6842	0.4293	0.9488	0.9719	0.5945	0.1426	1.577	0	0.3066	0.364	0.5385	0.4333
AC022762.2	1.8767	1.1101	2.9049	3.9066	2.0725	1.8468	4.0327	0.1669	0.8325	3.9093	1.7651	1.6095	0.9628	4.8808	2.3817	0.5568	0.6896	0.7604	0.9761	0.5586	0.4635	1.408	0.7076	2.3808	2.5358	0.9183	0.8545	0.5564	2.2784	0.604	3.2003	1.385	0.3314	1.865	3.5943	0.5009	0.0756	0.6955	0.504	0.9776	1.9296	1.0533	0.4247	2.5328	0.2859	0.4174	1.1802	1.0386	1.4529
AL353708.3	0.8558	0.5062	0.8831	0.8571	0.2363	0.2406	0.9713	0.2284	0.0569	0.7838	0.9414	0.9234	0.2994	0.4674	0.9705	0.293	0.0726	0.7629	0.8093	0.3821	0.4756	0.214	0.088	1.7714	0.6702	0.3257	0.3507	0.5708	0.3848	0.482	1.7883	0.4211	0.2267	0.9112	0.5464	0.4406	0.1034	0.3568	0.1217	0.9473	1.5179	0.3478	0.1937	0.385	0	0	0.5272	0.6686	0.4882
AC018653.4	1.4613	0.8511	0.2011	0.8265	0.2582	0.5752	2.0698	0	0.5445	0.8817	0.1118	0.3881	0.2454	0.7297	1.4205	0.4002	0.0991	0.1895	0.995	0.261	0.7579	1.1694	0.1202	2.4978	0.8078	0	0.2395	0.13	1.2616	0.6584	0.9266	0.4793	1.0322	0.7468	2.0897	0.5349	0.2353	0.2437	0.6649	0.0761	1.5326	0.4751	0	1.6304	0	0	0.3151	0.3425	0.3334
AC018467.1	0.2398	2.422	2.3093	0	0.1059	0.9101	0.283	9.5199	2.3932	7.4402	0	15.4825	0.7045	1.085	0.1165	0.2955	2.7652	8.1608	0.2267	0.5888	3.5532	0.9194	0	0.9926	6.1408	0	7.9917	10.2358	0	0	1.002	0.0393	0.0423	0.034	9.6436	2.7978	0.0965	0.4332	0.0455	0	0.037	5.5127	0	10.7867	1.9724	0.1067	0.1662	3.6061	0.254
AL121655.1	2.061	1.3754	0.4726	0.6476	0.607	1.7384	4.8654	0.5866	0.1829	3.1089	1.1828	2.5089	0.769	1.2864	2.8939	0.5645	0	0.6681	3.1185	0.9202	2.2907	0.4582	0.8477	3.8532	3.4177	0.747	0.7508	1.5275	1.977	1.5477	1.584	0.676	0.2426	0.7802	1.5789	0.9431	0.7744	0.9548	0.5209	3.0418	1.2715	2.2337	1.2439	3.4616	5.8608	0.3056	1.1639	1.6103	0.6718
AC105206.2	1.8489	2.9912	3.9571	4.7444	2.6317	3.8122	2.3875	1.7541	3.4995	3.0988	2.2794	0.8184	2.2995	2.6928	2.7957	2.0255	1.8117	1.3318	0.4663	1.8344	1.8266	2.466	2.8729	1.646	3.0281	1.5189	0.3368	0.7308	1.7735	1.4545	2.25	1.3476	2.7571	4.5496	2.5181	3.0082	0.2646	2.3982	2.0251	3.2103	2.9149	3.5305	1.6366	3.1053	0	2.3761	0.443	1.605	1.7411
AC124045.1	2.4377	1.7353	3.5031	0.817	1.2444	2.6198	1.9281	1.1101	0.4326	2.288	2.1763	1.0071	1.425	1.3525	0.8777	2.3145	1.176	1.0887	2.4181	1.9833	1.0436	1.1922	2.0499	3.6171	1.9763	1.6964	0.8584	0.6263	1.5589	2.4059	1.9673	2.6653	1.1097	1.9995	1.6601	1.8592	0.5409	1.7767	0.9448	3.1886	1.7044	1.5097	1.7655	2.8855	0.4621	1.5906	1.652	1.5237	1.2891
AP000442.1	1.3488	0.7258	1.3314	1.1056	0.544	0.7255	1.065	0.5258	0.6868	1.4407	2.558	1.0903	0.4923	0.9518	1.4442	0.4176	0.5968	0.3802	0.9761	0.7332	0.6518	1.2515	0.9649	1.0964	1.6425	0.7397	0.2884	0.8345	1.5822	1.2457	0.5071	0.731	0.4143	1.432	1.917	0.9393	0.1322	0.7172	0.6226	3.3604	1.4472	1.0896	0.6159	1.182	0	0.2087	0.4336	0.3207	0.822
AP002784.1	0.713	0.6632	0.7357	1.3815	1.6273	0.7684	0.7265	0.947	0.7696	0.7597	0.1667	1.3019	0.4545	0.9766	0.7444	0.6834	0.7255	0.5521	0.7642	1.1141	0.7337	0.9774	0.4725	1.2801	0.6714	0.4048	1.3743	0.8103	0.6483	3.0212	0.7649	1.4161	0.8813	1.1246	0.3439	0.5891	1.4798	0.5615	0.6758	0.2373	1.1118	0.8003	0.0932	0.499	2.293	0.652	0.4636	0.9594	1.459
AC005013.1	2.1591	0.7205	0.4951	0.0848	0.0795	0.4047	0.4574	0.2305	0	0.3102	0.0688	0.9558	1.5105	0.3369	0.3498	0.6899	0.2441	0.3499	0.3403	0	0.2666	0.8399	0.5921	1.2495	1.1935	0.313	0.2949	0.16	0.6472	0.5791	0.1037	0.5902	0	0.2043	1.3784	0.6587	0	0.2	0.2729	0.2812	0.444	0	0.1303	1.2951	3.947	0.3202	0.6097	0.2812	0.0587
SH3BP5-AS1	5.8613	4.3848	6.2866	3.2121	1.2369	3.8237	7.9062	0.5517	0.3358	4.2766	1.5834	1.6855	2.8758	3.2457	6.4604	0.8427	1.2002	0.9475	5.1503	2.4178	3.6136	6.361	0.6075	4.5609	5.2554	1.8936	0.4455	0.7389	2.7891	3.9807	6.3318	1.6349	1.5322	3.7129	6.1051	3.0342	0.6441	1.0006	1.0966	5.2009	4.8689	1.9222	0.9136	9.23	1.5374	1.0813	1.9382	0.8414	2.7431
AL021707.6	5.6023	3.8433	12.007	4.9763	3.0459	2.6657	16.0428	0.552	0.6882	11.3297	5.5236	20.3163	4.7032	4.7073	14.3827	1.5343	1.1694	2.0954	15.8943	1.5393	6.8654	7.1849	1.0635	10.2439	7.464	0.9372	5.5336	2.108	5.5807	19.8328	13.787	2.2616	0.761	5.8733	8.9141	2.3664	0.347	0.8385	1.2254	5.8365	8.2417	2.5021	1.6386	6.2816	46.4803	0.9586	3.6505	1.5151	4.706
SNHG26	1.6148	2.2285	1.9777	5.9717	2.3125	1.0378	1.7917	1.5455	0.614	3.9999	1.0388	1.5082	2.5325	2.171	5.3014	1.7496	1.0473	0.8743	0.9196	1.5687	1.499	1.9171	0.8759	1.6399	3.0081	0.8413	1.1442	0.3946	1.0596	7.5956	1.4832	1.0361	1.0404	7.1647	3.1812	0.8932	0.9087	1.0752	1.2043	1.368	1.0619	1.3023	0.9061	3.0464	1.1029	2.0683	0.5083	1.2617	1.3073
AC004263.1	0.4681	1.2496	1.6102	0.8826	0.4136	0.702	4.0805	0.1332	0.0831	1.0088	0.8955	1.4506	0.4367	0.5844	0.9101	0.1709	0	0	0.8854	0	1.2719	0.8325	0	0.7502	1.3226	0.3393	0.0853	0	0.7858	0.1004	1.1693	0.1024	0	0.5317	1.5939	0.4284	0.1005	0.347	0.0592	0.4877	1.0589	0.0725	0.339	1.4602	0	0	1.1055	0	0.2543
AJ011932.1	0.455	0.0828	0.313	0.1072	0.1005	0.5118	0.0826	0.4857	0	0.7845	0.0871	0.6043	0	0.426	0	0.3739	0	0.295	1.2049	0.4063	0	0.6069	0.5615	0.3646	0	0.5937	0	0.4047	0.0818	4.6863	0.3935	0.4478	0.4821	0.9044	0.3486	0.3123	0	0.1265	0.3451	2.2518	0.5615	0.317	0.0824	0.9008	4.9911	0.4049	0.0701	0.1778	0.0742
AC004687.1	2.4089	1.4457	3.2696	8.2237	0.7478	1.7573	9.6948	0.5003	0.5545	1.6836	0.7224	6.5709	1.6033	1.8287	4.2614	0.0713	1.2367	1.6461	9.6789	0.407	0.7719	2.7354	0.3749	2.7822	2.3033	1.2176	4.4113	0.5211	4.4263	0.88	5.7045	0.1708	1.3337	2.588	4.6885	0.8044	0.0839	0.3619	1.1355	7.4271	8.9569	0.6048	0	6.1861	11.5845	0.3476	2.7274	0.4069	1.8676
AP002761.3	1.8725	1.1588	5.9687	0.1765	1.1856	1.5444	2.539	1.1459	0.3655	1.8831	0.6448	1.9479	0.7336	2.0259	2.427	2.5642	1.1856	2.7517	1.0625	1.5049	1.5262	2.0397	1.4377	6.0015	1.6791	2.0632	2.3874	1.1658	1.2124	1.8079	1.1154	2.252	1.1022	1.8077	1.5302	3.0276	0.3618	2.3942	1.1833	1.9833	1.6558	1.2756	0.5425	3.0776	2.206	1.4994	1.9419	1.3655	1.3022
AC074124.1	2.257	2.4647	8.9281	0.2659	1.6202	1.1105	3.7912	1.2045	0	7.6603	0	3.3719	2.2106	3.1698	1.8283	0.4636	0.1914	0	1.4941	2.0154	5.0172	3.9511	0.2321	0	4.4706	1.7179	2.1582	1.2546	1.4208	0	3.5778	0.9254	0	0	2.5937	0.1291	0	0.941	0	0	2.4367	0	0	7.0062	0	0.7531	1.5643	1.543	0.092
AL117336.2	5.416	3.4839	9.6466	4.1612	2.7858	4.923	4.1766	1.9638	1.4613	7.6102	1.3058	3.941	3.6125	2.8712	6.5389	3.7388	2.4159	3.5593	2.5539	7.0888	4.7278	3.2655	4.3333	2.7742	6.7257	3.5818	19.0129	7.4563	5.3643	5.0142	8.083	1.0707	1.8342	6.0668	4.585	2.6481	0.2151	8.3312	2.1379	4.9854	5.6298	5.5137	1.5045	3.6849	0.1808	4.7528	2.3082	3.2461	3.9905
COLCA1	4.031	4.5194	8.7552	0.1954	1.9944	2.3574	1.7652	0.9097	0.1901	3.0875	8.7823	1.3918	1.4374	1.5959	0.8135	1.4447	0.8126	0.9557	0.2266	0.3497	3.3624	3.4256	0.7769	1.1443	4.6729	0.7714	0.8559	0.758	1.3423	0.0148	1.0556	0.3324	0.3254	0.7129	6.5764	0.9487	0.1298	1.4278	0.7947	0.45	0.5471	0.7168	0.9467	5.6167	0.9966	1.2502	0.5286	0.243	0.5744
AC116407.2	1.5992	1.1643	4.6547	4.0587	0.9782	1.3144	3.3957	1.3656	0.7859	6.1503	0.1412	2.7773	1.5147	3.2251	3.5078	1.0782	0.8346	1.5951	3.3506	0.8788	4.5578	4.4302	0.8096	2.8914	4.7148	0.5886	1.6133	0.5471	3.85	2.9298	7.0914	1.2105	0.7821	2.3752	3.8955	1.1259	0.5151	0.9574	0.3265	4.9343	3.0358	0.8	0.1336	2.2138	0	0.3284	1.2884	1.2495	2.4462
LINC00702	0.6921	0.3204	0.6054	0.2457	0.2	0.3652	0.18	0.5508	0.2729	0.2099	0.1144	0.1418	0.1674	0.2667	0.4042	1.4836	0.1797	0.4986	0.8339	1.2208	0.5382	1.9545	2.3336	0.4792	0.296	2.1257	0.0747	0.3268	0.2274	1.3859	0.6748	2.1076	1.9072	0.5143	0.4364	0.5591	0.322	0.6935	0.4859	0.0356	0.6326	0.377	0.3404	0.2153	0.2499	3.3374	0.5343	0.5875	0.4345
AC020915.2	6.7979	5.4895	5.9398	3.3513	4.539	4.7234	3.9446	3.436	2.1837	4.5631	4.3648	8.9237	5.4445	7.7304	3.8231	5.0932	2.3058	1.4691	2.7636	6.768	4.8345	3.4392	3.3425	4.8417	6.1476	2.175	4.1201	3.0925	2.614	5.4568	2.3196	5.7666	4.1671	3.5941	5.7068	3.3253	1.0444	4.3002	2.2071	8.3845	4.242	3.7745	2.0373	5.8494	3.0949	6.7783	2.2263	5.4638	2.7126
AC011476.3	2.31	2.943	4.0788	4.0646	0.1361	0.8227	1.7339	3.7805	7.0502	4.3141	2.7987	0.6135	1.0774	2.6434	0.2994	2.9945	0.6791	0.8986	1.3107	0.3438	2.111	4.5702	0.7601	0.2468	3.0645	3.215	0.2524	2.5338	4.5979	1.6355	1.5091	2.0205	2.5563	4.46	5.4664	1.3742	0.2728	3.938	2.5691	1.7247	1.6626	5.0429	2.2864	5.3763	0	0.4111	0.2372	1.7446	1.1546
AC107057.1	0.6633	0	0	0	0	0	0.1205	0	0	1.2864	0.5076	0	0	0	0.2149	0	0	0	0.1255	0	0	0	0	0	0	0	0	0	0	0	0	0	0	0	0	0.1518	0	0	0	0	0	0	0	0	6.467	0	0	0	0.2162
AP003392.5	1.6276	0.8295	1.5676	1.3809	1.438	1.0983	2.4828	1.3898	0.5199	1.5433	3.861	1.9453	1.8219	1.8287	2.1096	0.5349	1.325	0.6331	1.724	1.1627	1.6885	0.6513	1.339	1.565	1.1996	1.2743	1.6009	2.0267	0.8197	7.124	0.3753	0.6407	1.6096	1.1091	1.4963	1.1917	0.2097	0.9048	1.1108	3.3914	2.0083	0.4536	0.4715	1.4059	2.7771	0.2896	0.9025	2.289	1.2734
AP003390.1	0.6069	0.2945	1.3916	2.5742	0.8042	0.455	0.5143	0.3455	0.3231	0.959	0.0774	0.6716	1.2454	1.0101	0.3933	0.3324	0.5489	1.1803	1.1478	0.3613	0.4497	0.6745	2.4962	1.837	2.6836	0.3519	1.7685	0	1.0915	12.8903	1.3993	2.5214	2.2862	1.0339	0.5166	0.8331	0.4561	0.2249	0.9204	0.9484	0.7488	1.0336	0.2198	1.0193	0	4.1396	0.4362	1.8966	0.7913
AC092053.3	0.5742	1.076	1.4045	0.6615	0.5449	0.5501	0.587	0.2633	0.4981	0.1283	0.4394	0.0988	0.4523	0.2257	0.5237	0.396	0.0866	0.2206	0.4022	0.4747	0.7406	1.1771	0.0875	1.3064	0.2508	0.8232	0.0813	0.2459	0.3595	0.9445	0.1471	1.0881	0.3455	0.4468	1.4554	0.6228	0.5205	0.13	0.7821	0.4542	0.3149	0.2667	0.1386	0.4898	0	0.0946	0.3144	0.3489	0.1802
AP003392.1	9.103	6.1854	10.8549	5.0532	2.7702	5.9152	3.8204	0.8636	0.8615	4.9695	4.9534	0.2686	3.9626	7.9548	3.9328	2.4377	0.5489	1.1803	2.5252	1.987	7.4946	3.9122	1.3313	5.5109	10.1382	2.3755	0.5527	0.5397	6.549	12.7601	3.0318	1.0616	2.8578	5.8585	13.7411	4.9986	1.1727	2.1366	2.3776	7.7976	6.6143	2.255	4.1755	8.5182	0.2465	1.7998	1.2462	3.0029	3.6268
AC008610.1	4.038	2.0579	8.334	6.4709	0.3568	1.968	4.6931	3.1032	3.0095	4.989	8.4459	14.6575	2.26	5.7132	16.2246	1.3271	2.0089	4.3632	17.7193	1.9231	8.3779	8.4379	3.1004	9.6347	12.9958	0.9367	5.7368	1.9154	4.5514	9.3569	11.3281	1.5894	2.8523	3.8218	5.3622	4.3116	0.5202	0.8979	0.8165	8.6942	7.8057	2.2507	0.7799	7.6542	16.4042	0.9581	3.3999	2.3136	5.5285
AC011444.1	0.6623	0.4219	2.3919	1.1705	1.7553	0.931	2.1046	0.5655	0.4407	1.1417	0.7602	0.4397	1.2046	1.1368	1.6094	0.5441	0.1123	0.644	0.7516	0.4435	1.2268	2.4291	0.1362	2.4764	1.8304	0.5041	0.1809	0.1473	1.0125	2.1314	2.2905	0.3258	0.2339	1.1282	2.0295	0.7576	0	0.4602	0.3766	1.7249	0.9193	0.3845	0.06	0.5363	2.0178	0.8839	1.02	0.9055	0.2699
AC027271.1	0.6937	0.3788	1.7898	2.0436	1.8388	1.2679	2.2677	0.5924	0.3693	2.691	0.3318	1.9577	0.4853	0.7578	2.5851	0.855	1.0589	0.2249	1.4434	0.6195	1.5422	1.041	0.5707	2.5941	1.1504	0.2263	2.6535	1.5425	2.246	3.2374	2.1995	0.5689	0.1225	1.1819	1.8602	0.5556	0	1.2534	0.9864	1.1745	2.247	0.9667	0.5653	1.2484	0.8455	0.9259	1.1753	0.6775	0.9046
AP000873.4	1.5197	1.3192	1.8497	1.0469	0.8263	0.8546	1.5709	0.0998	0.1245	1.6627	0.8051	0.3881	1.0468	1.8242	2.3485	0.1921	0	0.1516	1.1498	0.1044	1.2127	2.7287	0.1923	1.7485	1.5509	0.4576	0.2555	0.2079	0.5046	1.5802	1.213	0.6135	0.3303	0.6639	4.0004	0.5884	0	0.4549	0.5319	0.9743	1.0818	0.4887	0.508	2.1879	0.5699	0.208	0.8282	1.0047	0.9908
OLMALINC	1.7725	1.596	2.1981	2.312	2.0502	1.8448	0.8668	1.0787	0.807	1.9198	17.9773	2.1422	1.9231	1.4557	1.8187	1.4308	1.0073	0.9324	0.9293	2.4088	1.7339	4.1061	0.8378	1.1171	2.4609	1.4539	1.4273	0.8297	1.1438	1.266	1.6088	1.0302	1.241	1.7394	1.751	0.6581	1.3671	1.9231	0.8725	1.7656	1.4532	2.181	5.9569	1.9698	0.36	2.2549	1.2883	1.9558	0.9807
BX649601.1	2.2195	1.2792	2.6721	0.6102	0.3268	1.0401	2.5527	0.2369	0.0985	1.674	3.2553	1.2281	0.6211	1.6163	2.5171	0.4053	0.251	0.5996	0.9096	0.1652	0	0.37	0.1522	1.0868	1.9085	0.4022	0.8085	0.1645	0.5323	6.0716	0.9596	0.2427	0.2613	0.9453	1.417	0.2539	0.2383	0.2056	0.0701	1.2525	0.9129	0.8591	0.4689	0.7323	0.2254	0.4937	0.7407	0	0.2412
LINC00339	1.9113	0.8799	2.2044	0.7949	0.5215	1.0274	1.3067	0.192	0.2394	0.848	0.9464	0.1306	0.6135	0.579	0.4189	0.1848	0.1716	0.4191	0.9676	0.251	1.7287	1.031	0.2081	0.6006	2.4445	0.7335	0.0614	0.45	0.9909	1.1941	0.7777	0.3688	0.4169	1.0056	2.2969	0.7331	0.1267	0.2969	0.3091	0.9517	1.1445	0.5483	0.2545	1.5984	0	0.1501	0.5368	0.3733	0.5956
AC005519.1	4.2566	2.1129	3.4608	1.2037	0.547	1.0445	2.586	0.2974	0.206	3.5691	1.7767	0.3083	1.2128	2.0773	3.8118	0.2544	0.21	0.3512	1.5224	0.8293	1.3763	3.0968	0.191	1.0335	3.8503	0.3703	0.0423	0.2753	2.6726	3.1882	0.58	0.2031	0.492	2.7688	4.5062	0.5666	0.5733	0.3012	0.1467	4.6362	2.7693	0.8628	1.5414	5.0974	0.8489	0.0689	1.0251	0.7861	1.0848
SEMA6A-AS1	5.4226	2.464	3.6533	1.7626	2.0155	2.6708	1.1952	0.479	0.3384	1.1927	0.5294	0.4718	0.8791	1.2839	1.9388	0.6965	0.8118	0.8971	1.4571	1.6697	1.6349	3.5415	1.0152	0.6992	4.1757	1.4476	0.2656	1.1309	10.1836	0.3129	0.4743	0.4416	0.8717	1.2317	3.3807	1.7113	0.0361	1.3513	1.2903	0.4286	3.1608	1.4939	0.2167	1.9382	0.319	0.1664	0.5184	0.9058	1.0484
AC245060.5	3.8553	1.9063	2.7628	1.6354	0.3122	1.2647	2.6371	0.1509	1.0091	2.4647	2.8027	0.3627	0.2877	2.4867	1.2076	0.9679	0.2833	0.9373	1.9324	1.1762	0.8808	3.0425	0.4757	2.1967	1.6694	0.2795	0.4564	0.2286	1.6295	1.6957	1.2964	0.2951	0.8851	2.5177	1.6573	0.544	0.1759	1.1788	0.4872	2.9622	1.5064	1.7161	0.8842	1.4107	0	0.1715	0.9204	0.1255	1.6547
AC023906.5	0.6664	1.6375	1.3754	4.5545	1.6192	0.4684	1.6338	0.7824	1.0643	2.5132	0.51	0.3319	1.3055	1.8719	2.2674	0.365	0	0.7561	0.5042	0.7439	0.8642	2	0.9594	1.246	1.9033	0.3623	1.0014	1.1854	1.4983	1.7158	0.3842	0.1093	0.3531	4.1629	1.3615	0.6099	1.0732	0.8336	0.5685	39.6618	1.6446	0.9287	1.3877	1.9788	0	0.593	0.3592	2.2129	1.575
LINC00892	1.211	1.5429	0.4166	0.7524	0.7295	0.3714	1.5194	0.6345	0.7619	0.8778	0	2.3757	0.6778	0.7902	0.9275	0.2714	1.6431	0.4996	1.9157	0.9339	0.4894	0.2203	0.4075	0.6763	0.852	1.3407	2.0152	0.8812	1.1088	0.6023	1.2058	0.2167	1.2442	0.7502	0.3655	0.7557	0.3368	1.0404	0.6261	0.4014	3.1921	1.2017	0	0.8519	0	0.5387	0.6952	0.9032	1.3816
PXN-AS1	1.8056	1.9302	1.3837	2.0359	0.5452	0.7968	1.1455	0.6245	0.5475	1.4184	1.3816	1.381	1.2024	1.6549	0.6073	0.4507	0.6822	0.6964	0.8213	0.6939	1.4395	0.9755	0.7897	0.6959	1.7182	0.5169	0.8742	0.6708	1.8416	1.6918	1.1857	0.7647	0.6135	1.5445	1.7626	0.9308	0.3018	0.8258	0.4419	1.381	0.8601	0.7325	0.538	1.8261	1.337	0.5694	0.9786	0.9821	0.8493
AL135791.1	3.074	0.4662	2.8197	1.0263	1.1316	0.8643	1.349	0.1094	0.4773	2.7049	0.294	0.2551	1.362	3.2779	2.0751	1.6136	0.5213	1.3286	0.8721	1.0294	1.5185	1.1959	0.3161	0.3421	2.596	0.6128	0.14	1.0252	0.3686	0.4947	2.5103	0.168	1.3571	3.0548	0.8504	0.2931	0.1238	0.712	0.3885	1.5345	2.9237	2.2012	0.3247	1.8439	0	0.9117	0.7496	0.7005	0.5428
AC132872.3	5.3823	4.2859	9.3727	9.8301	1.7832	3.405	11.6068	0.7899	1.0745	7.6841	6.6285	3.2388	4.142	3.4646	11.1182	2.6718	1.7116	0.7633	8.7805	1.502	3.9882	11.6658	0.2767	10.6918	5.5785	1.9021	0.4595	0.8976	5.3244	9.9602	7.8535	1.5448	1.7822	7.3546	9.0201	4.3872	1.4626	0.6545	1.2754	4.7312	6.5373	0.9375	2.8018	11.8651	0	0.7483	3.9376	1.7084	5.4829
AC004069.1	1.1562	3.3671	3.1818	2.089	1.5323	1.6255	2.7296	0.5759	0.9233	5.6477	6.046	3.1989	1.7257	2.526	7.1185	0.7389	0.5229	0.9995	2.114	1.8929	2.2847	2.5703	0	1.0294	1.2073	0.3353	0.9477	0.857	0.6239	3.5971	2.8882	2.1491	0.6806	4.9245	8.1692	1.3228	0.4965	1.0713	0.5845	1.1042	2.4966	2.4168	0.5583	4.6469	0.2349	2.229	0.8904	1.8068	0.8795
AL096828.3	2.061	0.9169	1.4179	0.2159	0.7081	1.0302	1.0812	0	0.8533	0.6909	1.4019	1.3685	1.1535	1.7153	0.2968	1.1289	2.4856	1.93	1.2128	0	1.0181	0.6109	1.3187	1.2232	0.9283	0.3984	1.1261	0.8147	0.4942	1.9162	3.6961	0.3004	0.8088	1.1704	1.2865	0.3144	0.3688	0.7638	0.6078	2.505	0.5651	1.2764	0.0829	1.4011	6.9771	1.0187	0.4938	3.3994	0.6718
AC022007.1	1.0968	0.7666	0.5584	1.1683	0.2229	0.5428	1.0915	0.3559	0.6656	1.333	3.953	1.0778	0.6016	1.0269	1.5069	0.3484	0.372	0.4266	0.7717	0.9598	0.9265	0.6144	0.4331	0.5273	0.7841	0.6011	0.2517	0.2341	0.4498	9.0081	1.7703	0.9785	0.7438	1.7813	0.6274	0.4617	0.1342	0.5365	0.2412	2.2624	1.2721	0.7744	1.7396	0.8448	1.2565	0.7221	0.5541	0.4627	1.2514
AC008438.1	1.6111	0.782	5.0246	1.3668	0.9489	0.9664	1.0143	1.1464	0.8577	1.2962	3.4109	1.7116	1.563	2.0783	2.3666	1.0002	0.9472	1.0445	1.4221	0.9591	0.7959	1.361	3.1809	1.0327	3.1665	2.0555	1.2912	1.1463	1.9318	0.8296	1.2383	0.6341	0.8346	1.2199	1.3714	0.9339	0.2421	1.1345	0.9366	4.1962	3.1144	1.0976	0.7001	1.4303	0	0.2867	0.9926	1.5945	0.6652
AC099522.2	1.8486	1.7599	2.7392	1.2734	0.9423	1.1195	1.3944	1.2142	0.757	2.0225	2.2851	2.6438	1.1938	1.7752	4.4234	1.3241	2.4117	2.8579	2.851	1.3968	1.6859	1.5173	1.9887	1.6711	2.6201	0.804	2.0202	1.3912	0.8696	5.2171	3.5247	1.306	0.6027	3.4723	1.0894	1.3014	0.8244	1.2648	0.5931	5.111	1.5791	1.1889	0.2575	2.0983	10.3981	1.3917	1.2265	1.111	0.649
RAD51-AS1	15.982	7.5931	16.5956	5.9236	2.2373	7.8269	17.4545	0.8169	0.9586	16.5896	20.0958	9.4412	7.7269	7.8214	15.9978	3.1236	2.0361	3.4538	10.7291	4.1206	9.6741	9.1071	2.3147	10.1605	15.3738	3.2961	2.7059	1.2679	6.7072	8.3794	12.2836	4.7746	3.3391	6.6896	15.9038	3.8456	0.8096	2.8364	1.8207	15.0673	12.2206	4.7224	7.5129	11.8282	2.6519	1.1015	6.7951	2.6381	5.5278
AC007036.1	0	0.7428	0.5399	0.2959	0.9708	0.5296	0.6841	0.201	0.5014	0.2706	0.9009	0.938	3.7776	0.196	1.119	0.086	0.1065	1.73	1.0094	0.4205	0.1163	0.1047	0.7748	0.8385	0.4628	0.4779	1.7154	3.0713	1.4116	0.2021	0.9048	0.103	0.6653	0.624	6.7343	0.7183	0	0.4363	0.8927	0.4906	1.1621	0.6562	0	0.452	3.0608	0.419	0.2418	0.4906	1.2792
AC006042.1	4.2399	4.5567	5.2782	1.5226	0.446	4.9956	4.4731	0.5172	0.6449	2.2625	8.6519	2.9494	1.243	2.5205	5.3646	1.6589	0.4109	1.1781	4.5062	1.8029	0.4488	2.8276	1.4948	2.3727	4.1666	2.9857	0.4413	0.5387	2.3241	1.0397	4.7718	3.1788	0.9983	2.1784	2.578	3.788	0.1951	0.3367	1.3014	2.8396	3.3631	1.3129	2.559	5.5226	0	0.8982	2.1145	1.893	1.9087
AC114730.3	1.2681	1.187	2.6172	1.1954	0.5602	1.3243	2.8292	0.0773	0.0964	3.5916	0.6238	0.842	0.6083	0.5654	3.522	0.1985	0.6145	0	0.8909	0.1618	1.7451	2.6579	0	2.3225	1.5355	0.1576	0.198	0	0.9123	1.3993	1.2531	0.5942	0.6398	0.5144	2.3131	0.4145	0.1167	0	0.0687	1.4155	0.8941	0.0841	0.3936	1.8256	0	0	0.3348	0.1415	0.7086
AC123912.1	2.3668	3.1878	2.4424	0.4462	1.2546	1.8633	1.4613	0.6063	0.126	2.5502	1.9922	0.9429	1.5896	1.6251	0.7669	1.2964	0.8028	0.6138	0.4477	1.4794	0.3508	1.4206	0.9735	0.7586	2.6166	1.0294	1.5519	1.4735	1.7879	0.3047	2.1829	1.0869	1.0031	1.4784	5.6815	0.6498	0	3.9472	1.6153	6.2877	1.6062	5.2769	0.5143	1.4481	0	0	0.5103	2.404	0.1543
AP000873.2	5.0763	1.7577	4.0246	1.0504	1.0529	1.6884	2.1022	0.6475	0.379	2.468	1.8593	1.1715	1.0741	2.9754	1.9658	1.2716	0.504	0.8629	1.4402	1.382	2.2018	1.9404	0.9676	3.1911	2.9087	0.8481	1.4207	0.8259	2.0599	4.6222	1.0706	0.5686	0.7871	2.0565	4.0787	1.4022	0.329	1.1012	0.5164	2.3863	2.6925	1.4377	1.1097	1.5485	0.3018	0.7436	0.8295	1.1366	0.8576
AC104794.3	16.0175	7.717	13.2417	9.3257	3.3595	10.7859	17.6479	13.8493	12.0378	14.822	7.6992	12.3784	7.6463	7.8976	19.7138	22.1186	9.177	13.2641	11.5328	11.6588	7.4304	12.2978	17.5505	46.7354	14.9303	7.6106	7.6122	9.1581	5.1808	7.7108	21.3372	17.2626	23.1516	15.2107	8.009	17.4311	5.007	8.9043	8.293	14.0229	12.0408	12.254	7.482	24.5128	9.5144	11.7365	8.9557	12.2517	7.4591
AC079075.1	0.9425	0.6004	1.621	0	0.2082	0.53	0.5135	0.3018	1.2543	0.6093	0	0	0.7912	1.0295	2.5959	0.3872	0.4795	0.3055	0.0891	0.4208	0.873	0.1571	0.3877	0.3776	0.8683	0.205	0.3863	0	0.0848	0	0.1358	0.4637	0.1664	7.6269	0.8424	0.1078	0.0759	0.5239	0.3574	0.3682	0.1454	0.7661	0.0853	1.1025	0	0	0.1452	0	0.1536
KLF3-AS1	3.4096	2.1303	6.1799	0.7494	1.1007	2.5903	5.9119	1.2457	0.3578	5.8286	11.1012	1.0776	2.4496	0.2558	5.4178	1.4187	0.3225	0.4357	2.1641	0.688	2.8301	5.3676	1.5778	1.7425	4.3675	2.0819	0.6718	0.5832	0.973	2.6167	1.682	0.7312	0.9611	1.5452	5.4755	1.4927	0.1795	1.0024	0.6526	0.4099	1.7597	0.8908	1.5731	6.2715	0.02	1.9398	0.8735	1.0758	0.2137
AC009283.1	13.6141	8.18	18.2804	11.4417	3.5505	9.5004	18.7059	4.1317	4.2786	22.6926	12.1122	16.4458	9.0883	11.2622	23.0666	6.4689	3.4495	7.3375	17.2494	7.4699	7.7786	10.0637	3.3734	13.4056	11.6056	3.9951	8.9626	3.0636	9.4996	9.3964	20.234	3.6585	7.2994	12.6677	8.9639	6.7553	0.7924	7.7506	1.8657	20.6769	19.0242	13.3329	8.0782	16.2935	10.3949	4.2323	11.065	6.2796	10.9076
AC097372.2	2.0433	0.6611	2.0304	1.9261	0.3009	0.1277	1.0719	0	0.6043	2.1527	0.6949	1.809	0.3812	0.2834	4.2667	0.6218	0	1.0303	2.1471	0.6082	0.6729	1.8169	0.1868	0.8489	1.506	0.0987	0.3722	0	0.98	1.8997	1.3087	0	0.3207	1.1603	1.8553	0.2078	0.3656	0	0.0861	0.1183	0.5603	0.6327	0.8221	0.8171	1.3834	0	0.9791	0.5321	0.5921
LINC01948	1.642	0.9622	2.1307	0.2076	1.0202	2.2746	0.6449	0.4788	0.4051	2.0828	7.0844	1.4626	1.5914	0.7	0.9084	1.6672	0.8151	1.8175	0.8787	2.0385	1.3948	3.0537	0.4832	2.1892	0.5559	0.7084	0.6784	1.5079	0.2449	0.2664	1.9084	1.5676	1.2259	0.8794	2.175	1.234	0.0258	1.0687	0.3695	1.4742	0.9224	2.4617	0.2562	2.1525	0.9111	0.5939	0.6703	1.1995	0.383
AL606834.1	4.593	2.825	3.4866	1.8662	3.5681	2.0484	3.5663	1.9609	1.9392	2.3891	11.3922	3.3652	2.0387	3.6578	5.1319	2.7761	2.0414	1.4375	3.0555	1.5557	3.5207	3.6968	1.6938	4.8223	1.8677	2.3421	1.9039	1.4086	1.8801	10.1942	1.3694	8.104	4.0274	3.7774	2.9929	4.8558	2.5504	2.9054	1.5613	3.7125	1.7588	3.5311	6.3088	3.8191	6.9487	3.382	2.5856	4.331	1.4456
AC027307.2	12.1939	14.7959	15.8989	7.663	11.6454	18.0242	8.4357	18.345	19.6594	23.9248	33.4138	21.9768	13.0643	25.2986	17.0841	15.0125	5.121	9.1101	8.3469	12.2369	8.0028	9.2938	14.9036	12.345	15.6634	11.7184	12.0567	14.6668	9.9843	21.9765	7.2299	11.3514	16.1604	12.0685	13.3456	12.2759	5.6852	14.3966	9.4228	13.8531	10.2453	9.1701	7.9063	19.1013	1.9815	10.0228	11.0537	16.2416	6.8899
GATA3-AS1	0	0	0.0614	0.042	0.0197	0.0502	0.0324	0	0	0.3076	0	0	0.1248	0.0557	0	0	0.121	0.0289	0.0506	0	0	0.0297	0	0.0477	0.0164	0	0	0.476	0.0642	18.8043	0.2057	1.2874	0	0.1013	0	0.0408	0	0	0	0	0	0.0207	0	0.0482	36.5828	0	0.055	0	0.0145
NCBP2-AS1	2.0708	0.6853	1.2951	1.1534	1.0811	0.6352	0.8888	0	0.5011	0.5679	0.8643	0.5	0.4214	1.175	0.854	0	0	0.122	1.0682	0.1681	0.279	0.3766	0.1549	1.2067	0.6937	0.4913	0	0.1674	1.3543	2.1811	1.0852	0.1235	0.5319	1.3897	2.1152	0.3446	0.1213	0	0.3569	2.0593	1.2775	0.5246	0.5454	2.1003	0	0.5025	0.2319	0.7354	0.4296
AC245060.6	1.646	0.7227	1.0805	0.4738	0.0888	0.7348	0.68	0.059	0.301	1.2726	1.0192	0.1919	0.4079	1.2941	0.6596	0.1721	0.1193	0.4399	0.2899	0.2356	0.4097	0.5866	0.2481	0.6242	1.1807	0.2569	0.0481	0.1118	0.7096	1.197	0.9561	0.1319	0.2663	1.163	1.0781	0.1322	0.0202	0.3143	0.4145	0.8051	0.7597	0.677	0.1274	0.5291	0.1991	0.0671	0.3445	0.216	0.5734
LINC01842	0.9643	0.2006	0.0948	0.5843	0.2434	0.6197	0.2001	0.4117	0.44	0.5343	0.3689	0.1829	0.9252	0.172	1.2498	0.4527	0.1869	0.3572	0.2606	0.246	0.6124	0.0919	0.5666	0.3679	0.5076	0.5392	0.2258	0.1225	0.3469	20.7484	0.5559	0.9037	0.2919	0.6258	0.0704	1.3868	0.4437	0.0766	0.4701	0	0.4249	0.2559	0.0499	0.2479	0	0.1226	0.4243	1.5068	0.2694
AL021807.1	0.749	0.9543	2.3188	0.5295	0.0827	1.3689	0.34	0.9593	4.2863	3.4702	1.1463	4.7247	0.4192	0.2338	1.3348	0.9231	0	0.9712	1.1333	0.6688	0.9712	3.3717	0.154	0.2	1.7251	0.0814	1.3301	3.1643	0.7409	14.9453	0.8635	1.4741	0.7936	0.7443	0.1913	0.5141	0.3015	1.0409	0.071	2.341	0.1155	0	0.2712	2.6957	0.9128	0.833	0.2884	1.9019	0.2442
AL024498.1	0.6473	0.6807	1.0885	0.678	0.2859	0.6875	0.4441	0.1842	0.1149	0.589	2.0638	0.5253	0.5635	0.2245	1.1652	0.3152	0.4879	0.8859	0.5713	0.2569	0.7461	0.4796	0.4733	0.461	0.7686	0.5005	0.5109	0.2559	0.8538	1.0185	0.456	0.2831	0.3048	0.6126	0.8449	0.2633	0.0232	0.1599	0.2182	0.6744	1.198	0.9688	0.3125	0.5436	0.0877	0.4479	0.4652	0.5057	0.8206
SPINT1-AS1	4.184	3.1704	9.3402	3.0587	6.4125	3.7933	7.0709	5.7964	8.4093	3.9378	43.321	14.628	5.6392	4.1573	2.9882	2.6192	6.7775	15.5558	2.6487	8.3112	4.8086	8.5418	3.161	10.8102	10.8561	4.3081	11.1978	11.7713	7.6483	0.1649	6.1527	18.1492	3.0158	2.0851	8.2862	9.3387	1.045	5.7436	5.957	2.2684	11.8528	6.4252	1.2987	9.1889	79.4018	2.2792	4.3136	11.008	4.4536
LINC00310	0.5483	0.3405	0.3107	0.3193	0.171	0.7618	0.246	0.7161	0.206	0.709	0.506	0.3855	0.2708	0.4228	1.1915	0.2827	0.2407	0.3346	0.6711	0.7489	0.4541	0.3227	0.398	0.672	0.4517	1.0662	0.2644	0.0287	0.673	0.3322	0.7809	1.7563	0.7519	0.4945	0.1812	0.4428	0.3324	0.3765	0.2813	0.3192	0.7562	0.2697	0.2803	0.9055	0.3145	0.574	0.1888	0.4788	0.3995
AC243960.3	0.7643	1.0731	0.3756	2.2642	0.9646	0.614	0.3172	0.6992	1.1043	0.0941	0.0418	0.145	1.2832	0.5452	0.4245	0.3588	0.2222	0.3539	0.9499	0.78	1.2135	0.6553	0.7185	0.1166	0.4023	1.4246	0.179	0.4855	0.5891	0.3514	0.8182	2.0055	0.4627	2.666	0.948	0.2998	0.7736	0.6069	1.0349	1.3081	0.5389	0.71	0.0791	1.2182	0	0.9714	0.2018	0.7677	0.7118
AC012645.4	0.3989	0.6171	0.7546	0.799	0	0.2804	1.5573	0.1277	0.1592	2.7075	0.1145	1.0594	0	0.4979	2.0678	0.0546	0.2706	0.1293	1.4711	0.2671	0.4433	0.5985	0	0.5859	0.6982	0	0.109	0.0887	0.3946	0.5776	1.0346	0	0.3522	0.5662	0.9167	0.2738	0.0642	0.1109	0.1134	0.0519	0.4306	0.2779	0.1083	1.5791	0.9722	0	0.2764	0	0.8776
AC138956.2	11.6216	6.5645	11.9927	6.8941	4.1602	4.169	3.2748	0.941	1.0667	4.3179	3.9865	0.2661	4.4857	7.129	3.6359	2.8536	2.4468	1.1691	2.6529	3.3996	7.1267	6.5478	1.6484	4.1743	7.9747	2.0916	0.1095	1.2475	4.613	1.8056	2.4256	1.8403	2.2646	4.6652	6.1403	3.3009	0.8389	1.8936	2.8869	2.2962	8.5295	3.909	4.2811	8.077	0	0.1783	1.3579	2.0352	4.1803
AC027796.4	2.421	2.6879	5.4962	9.2426	0.6417	0.6807	6.0231	0.8269	1.2243	5.2692	2.1305	3.215	0.813	2.569	2.5103	0.7957	0.1642	0.7848	7.0976	0.3243	1.3454	3.8749	0.4979	2.5864	3.6133	0.5791	0.5953	0.646	3.7883	10.051	5.8613	0.2382	1.7101	3.437	4.2041	1.1632	1.0136	0.2692	0.459	3.6572	5.8249	1.6305	0.3507	6.0558	2.5079	0.5385	1.5288	1.1349	1.7757
AL391834.1	6.2344	3.6448	7.7982	3.4727	2.5037	3.7183	2.8818	1.2099	0.8046	5.7811	3.0359	3.8888	1.7975	3.6556	5.387	2.2766	3.076	0.7349	3.073	3.0366	2.9398	3.9057	2.3312	4.0367	3.7595	1.4791	2.684	2.0163	4.8931	1.824	1.7424	0.8675	0.8007	3.5403	5.307	3.2852	1.0344	2.3105	0.7163	2.8539	6.5269	2.5448	2.1208	3.6037	3.4537	1.3447	1.4549	0.8856	1.9707
MHENCR	16.2459	7.2119	23.5341	18.987	6.2431	8.8385	38.7603	4.2292	9.4218	31.252	17.2325	38.5008	9.536	18.7147	16.6055	7.5965	10.2148	13.7008	47.8154	7.3125	14.8761	17.3526	3.3683	15.8041	19.8101	3.3319	9.8874	6.8134	15.2989	21.5939	29.7695	7.5382	6.6241	13.9508	22.4639	10.5166	3.871	4.1852	3.7058	24.1493	22.6527	11.5337	5.2613	23.2456	37.8279	7.0511	9.6424	8.978	10.6347
AC016065.1	2.8486	1.5357	3.6714	1.5976	3.2336	2.3521	1.4406	2.3554	3.1673	3.8231	4.539	2.4422	1.776	2.6559	1.3787	2.2912	1.8347	2.8053	2.2098	2.1252	1.6299	6.2283	2.8774	1.4446	2.2191	0.8312	2.7387	1.5715	0.9728	2.1353	2.3488	3.43	3.4386	4.3206	1.9153	1.8151	0.5923	2.3854	1.2441	5.3908	3.7151	4.0532	0.9271	2.3879	0.835	3.1762	2.1992	3.7188	1.6103
AC009309.1	1.8399	2.4279	2.5316	2.0596	1.1176	2.716	1.5871	2.4548	3.5506	3.3702	5.5438	5.9559	2.1883	4.5939	0.5962	1.8897	3.5886	7.7536	2.3491	0.4108	2.045	1.5338	4.7301	1.72	2.8817	1.9006	4.0215	3.682	2.6475	18.0606	2.3864	2.7158	1.6246	3.657	2.3493	2.9469	1.7037	3.8356	4.2729	11.621	4.2567	1.3888	3.6646	2.8972	59.1428	3.0695	1.4878	3.0548	4.6483
AC087500.2	5.3111	1.9333	2.923	2.8036	0.7508	2.6282	5.7868	0.2721	0.7916	2.0143	2.1946	1.2696	1.3079	1.9891	4.9563	0.5818	1.5853	2.0659	1.6073	3.225	3.3057	0.8501	0.5243	2.4966	4.7756	1.386	1.0447	0.9447	1.9105	1.0939	4.0412	0.6968	0.9004	1.4477	5.9677	1.7499	0.2737	1.6534	0.6444	1.8813	3.0144	2.3682	0.6924	2.3703	0	0	2.8793	1.4939	1.1773
MIR181A2HG	2.3972	0.989	2.8586	2.1091	0.1412	1.0784	1.7413	0.9552	0.3403	4.4771	0.428	2.4407	0.4472	1.2968	3.0035	2.4511	0.3253	1.2433	1.33	0.8562	0.3553	0.8526	1.1832	0.2561	1.2957	0.7646	0.5239	1.1371	0.9773	10.4923	3.3164	2.621	0.7902	1.9058	1.8773	1.1701	0.4632	1.688	0.4242	0.999	0.2958	0.8908	0.5787	1.3229	5.6483	2.7017	0.64	0.7492	0.521
FOXP4-AS1	0.2265	0.4123	0.6234	0.5339	0.4503	0.0637	0.288	0.3385	0.1206	1.1228	0.4767	1.2034	0.0634	0.2121	0.6607	0.3723	0	0.2937	0.6427	0.5057	0.1679	0.2266	0.3727	0.1815	0.4174	0.0985	1.2379	0	0.163	3.9371	0.1306	0.6688	0.16	0.5146	0.5207	0	0.4378	0.1889	0.0859	1.2981	0.6988	0.2105	0.082	0.4077	0	0.4031	0.1047	0.0885	0.0738
PLCG1-AS1	1.2216	0.6968	1.9926	0.8963	0.267	0.5382	0.8782	0.2097	0.2548	0.6242	0.6553	0.1672	0.4088	0.4952	0.8651	0.3656	0.1709	0.0816	0.7241	0.5285	0.5972	0.7559	0.2176	0.4911	0.8678	0.2684	0.0826	0.2352	0.5345	0.616	0.4428	0.2231	0.4715	0.7151	0.7011	0.5244	0.2839	0.35	0.1814	0.879	0.8313	0.3627	0.3512	1.3371	0	0.3698	0.2715	0.5215	0.5214
SLC2A1-AS1	1.7818	1.9458	0.8172	1.0614	0.481	0.4453	1.5999	0.3698	0.527	2.2719	0.4545	1.4953	2.0361	2.0854	2.2453	0.7727	0.6883	0.5295	0.6834	1.2596	1.7971	1.0398	1.1197	0.423	1.0214	0.7535	0.3786	0.6603	0.2671	0.5097	1.8973	1.38	0.3671	1.3491	1.0997	0.7701	0.3427	0.7704	0.6099	0.0773	1.2367	0.7472	0.1255	0.481	3.8907	0.5945	1.1892	0.5027	0.4276
AL139041.1	0.3469	0.3788	0.4773	0.8174	0.3065	0.4876	0.9449	0	0	0.9717	0.6636	0.4606	0.2912	0.7578	1.0116	0.19	0.2353	0.4498	0.5249	0.3097	0.3855	0.347	0.1427	0.0926	0.5752	0.3017	0.0948	0	0.5615	0.8931	0.9998	0	0.8576	0.394	1.9488	0.2381	0.1117	0	0.263	1.5359	1.284	0.2417	0.1256	0.9363	0	0.6173	0.3205	0.6775	0.3392
AC104463.2	2.3585	1.2265	1.6226	0.9528	0.2977	1.1368	3.5488	0.2877	0.5381	4.5016	5.2854	2.4609	0.5657	1.2619	6.1138	0.1846	0	0.2184	2.6766	0.9026	0.9986	1.1235	0	1.9798	1.9866	0.8793	0.3682	0	0.7272	0	2.3307	0.221	0.238	0.574	2.2371	0.3084	0.1085	0.1873	0.2555	0.351	0.6236	0.313	0.488	1.2126	4.9275	0	1.2454	0	1.0983
AC147067.1	2.01	2.2615	5.531	8.3537	1.4529	3.0825	1.5264	3.6665	4.8635	4.2526	0.3496	4.6104	2.9657	3.6497	3.6709	2.5022	2.8511	3.7908	5.3914	2.1211	2.8433	4.265	4.2088	4.1971	2.2221	5.1658	8.3868	1.3001	3.4836	5.9982	6.5304	6.4729	3.614	4.358	1.5865	2.5084	0.2942	2.641	2.2862	1.2374	5.2982	2.4613	0.397	1.9729	23.3823	4.0644	3.6022	2.8553	3.7525
AC060766.4	12.0179	3.0121	8.9454	3.9928	6.8755	12.6298	5.5097	8.243	5.1391	9.2553	0.2261	9.6804	8.6006	10.4528	2.8089	9.7124	12.6971	4.0873	6.4093	9.5001	5.2554	6.9636	6.807	15.365	6.8972	4.0274	11.5187	7.0089	10.4179	12.8079	8.0633	8.1423	4.1749	5.2583	5.4337	7.3926	2.5381	6.2427	4.1084	5.747	7.6573	2.7453	1.2842	5.318	34.8153	7.8881	6.7969	11.2368	5.78
SNHG3	6.0041	4.39	6.1602	37.5323	6.6537	3.1289	4.5869	3.4473	3.582	10.1389	1.812	8.6264	4.0846	9.4824	5.5514	2.9344	2.2999	3.0704	8.1746	3.8593	7.0186	7.6803	1.6393	2.8755	7.2863	3.3993	3.7615	1.358	8.6671	28.2351	14.6646	4.4311	3.711	14.0644	6.4371	2.2383	4.4092	2.9061	2.7965	4.961	10.9048	4.3996	1.0215	5.7842	3.2171	2.5099	2.6148	3.3768	5.5932
AC092757.3	0	0.7092	0.8042	1.5611	0.6025	1.3148	0.8492	0.2495	1.1409	1.5115	0.8946	0.6469	0.3271	1.3378	0.8839	0.5336	0.1322	0.2526	1.0319	1.9138	0.8662	0.6497	1.122	0.5204	0.4308	0.5932	0.1065	0.5199	1.8923	1.0033	2.1339	2.5563	0.2753	2.766	0.6966	0.4458	0	0.1083	0.8865	0.203	1.0818	0.905	0	0.4909	0	1.7336	0.5401	1.5223	0.6351
AC109460.2	4.8779	2.2343	4.5114	4.522	0.7421	2.4161	1.9124	0.331	0.877	2.2694	2.5091	0.5791	1.1752	1.9962	1.947	0.7432	0.526	0.6283	2.6273	0.375	1.9628	4.201	0.2126	1.415	3.6309	0.8711	0.0883	0.3735	2.2311	2.9526	1.527	0.2755	1.0268	4.0725	5.0817	0.9904	0.2081	0.9697	0.4287	2.4063	3.4877	1.0203	0.7019	5.2436	0	0.2012	0.6866	0.2272	1.7797
AC007336.2	1.3296	0.1383	1.6987	1.3428	0.7552	0.1068	0.4139	0.1622	0	0.4093	0	0.1261	0.5315	0	0.1231	0	0	0.3694	2.1555	0	2.1111	0.38	0.1563	0.1015	0.9099	0.9913	0.1038	0.1689	4.3728	0.3668	1.3139	0	0.2683	1.2943	0.7761	0.0869	0	0.1056	0.7202	0.2968	3.1639	0.2647	0	0.2734	0	0	0	0	0.8668
AC009053.3	25.8295	12.9401	24.119	1.3066	6.1085	13.993	21.9247	1.7544	1.4757	15.4052	0.4492	7.5792	7.7939	12.6823	12.4274	19.1681	5.155	3.8058	0.6539	4.4266	8.3613	28.2091	2.1463	7.4039	52.1835	2.5391	4.1343	1.4793	6.0887	0.6927	4.0419	0.706	2.9718	4.9263	10.3772	7.7454	0.6932	11.5124	3.7714	8.9188	2.7564	3.3629	0.4724	9.6484	1.2321	4.0334	3.7873	3.1087	3.5614
AC008760.1	2.6218	2.3017	4.9866	2.8348	1.5669	1.4743	3.9769	1.1193	1.2315	3.9216	1.0621	1.9457	1.5537	5.1983	1.9989	0.9292	0.837	0.3	2.3919	1.5149	3.4283	3.9083	0.1269	5.0253	4.4898	0.6037	0.6742	0.5487	2.4965	2.1839	2.0447	0.4047	1.3073	2.4522	7.0891	1.6232	1.7385	0.7716	1.0525	0.482	2.3786	1.2894	0.1675	5.1621	0.7518	0.1372	1.2827	1.3254	1.4579
AL359399.1	4.8089	2.334	2.3631	0.1079	2.529	3.7344	4.4912	1.7598	0.2438	0.8883	0.0876	0.9123	2.4351	1.7153	1.484	1.3798	4.0391	0	0.5198	4.2942	1.8665	0	0.1884	0.9786	3.5443	0.498	0.2503	0.4073	0.9885	0	0.66	0.3004	0	0	0.3509	2.4102	0	0.5092	0.6946	0	0	0.1064	0.1659	1.3187	0	1.4262	1.3402	1.0735	0.0746
LINC01402	6.0672	3.7269	2.087	1.966	1.1726	1.9191	0.6886	1.2951	1.2112	2.9418	0.4353	1.7625	2.9712	0	2.9489	0.2077	1.5435	1.475	0.7172	3.0475	1.6859	0	0.3119	1.6205	3.3538	1.4844	0	0	1.6369	1.4645	1.5301	0	0.5357	0.8613	4.6481	1.5617	0.4885	1.4756	1.0064	0.5926	3.5091	2.642	0.6866	4.7767	0	0.6748	1.5185	2.3702	0.1236
SRP14-AS1	4.4489	5.093	3.833	1.3522	2.2224	3.6124	2.6427	2.6272	2.479	6.6483	9.5609	5.3145	4.7355	1.8427	5.2408	3.3593	2.454	1.3748	2.2885	2.9888	3.8357	5.2684	2.2746	1.7768	6.2591	2.2605	1.7267	3.1618	1.548	6.0483	1.7017	1.882	1.2042	3.1167	3.8225	2.3878	1.2588	3.7676	0.7646	2.8156	1.5134	2.472	2.0477	4.205	1.5962	3.2555	2.7856	3.4435	1.2605
AL031775.2	8.098	3.5183	9.5247	3.5705	4.1543	3.3786	5.4079	1.7844	0.8344	4.2783	2.8985	4.3363	3.6551	2.7719	9.4802	2.0032	3.1899	1.8629	4.4468	1.8661	4.6455	4.8779	2.5788	6.0002	6.546	1.7043	2.712	3.2527	4.5105	3.1947	3.7645	4.7983	1.4762	4.1536	10.9404	3.3471	1.6826	3.4852	1.4857	3.8101	4.6736	2.7907	1.7973	3.6667	0	1.3945	6.9201	1.6328	2.4695
SLC25A21-AS1	7.4783	6.2451	5.4474	0.622	1.0445	6.2152	2.1169	2.958	1.1123	7.8207	0.0842	6.134	0.8309	3.5009	6.9845	6.5963	0.5969	1.319	1.2065	3.1425	2.3225	0.5867	1.7189	2.7904	9.4429	2.6308	2.5539	1.027	0.4945	4.1057	1.4898	3.8237	0.738	4.2467	6.2909	1.5852	0.6553	2.7817	0.6046	6.9031	1.1534	2.3498	2.2501	9.4599	2.9487	3.6205	2.185	0.9881	0.6632
AC116913.1	3.3671	1.5099	1.88	1.932	1.7246	1.3446	1.8078	0.9792	1.0911	2.3556	3.3794	1.9441	1.8026	1.523	2.7197	1.9246	1.9532	1.4237	1.7168	1.7866	2.0249	1.5621	2.1277	3.884	2.5176	1.2735	2.2665	1.2586	2.0363	2.7955	2.3348	1.5366	1.8269	1.9952	2.1185	1.9204	0.943	1.3835	1.3322	2.5928	2.6794	1.9267	1.5374	2.3886	4.8173	1.2591	1.428	1.9064	2.1634
AL121895.2	1.6568	2.1539	2.6052	0.5578	2.3002	3.9928	2.4069	1.0105	1.134	3.2642	1.9017	0.6286	1.4571	3.2502	1.2271	0.9075	1.2845	2.1482	1.6116	4.6497	2.1045	0.9471	2.3365	4.2986	2.5294	1.3382	3.2332	3.7891	1.1068	0	1.7736	1.8632	1.0031	1.6128	1.3297	0.9748	0.686	1.5789	1.9742	0.9863	5.5486	6.0464	1.7142	1.9592	0	0.6318	1.9685	2.0341	1.3116
AP001189.1	6.8998	3.6999	4.4915	1.119	2.5564	16.7715	4.5269	4.0861	0.7899	4.2208	0.6529	0.1971	1.5779	1.5745	3.5579	5.2018	0.906	1.6354	6.2024	6.5588	6.2121	10.8851	3.6009	3.0912	2.7614	5.4857	0.1216	1.3197	2.2418	0.8118	1.3258	3.6503	6.9176	4.508	7.1238	4.6851	1.3859	3.7119	3.3756	1.0435	3.4786	2.6879	1.9075	7.53	0	3.4986	2.8338	2.9563	2.225
AC036176.1	7.9516	6.7702	8.9936	1.461	5.6559	6.4419	4.6991	9.4364	3.659	8.2482	18.4088	9.7543	6.2606	1.1777	4.629	6.1273	7.7715	4.0193	2.753	8.7854	5.5924	4.8535	3.5478	10.6548	8.2445	3.2826	13.4765	13.1853	3.2967	4.8579	3.2629	6.7193	5.1408	4.2093	3.304	8.0791	9.6795	6.2185	7.2561	7.231	5.0719	8.451	3.3675	10.2833	3.4493	9.2333	7.4311	8.5292	2.1527
AC132192.2	2.3982	0.9066	3.9977	3.6518	0.8149	0.6743	2.7135	0.1969	0.2455	5.0487	1.5528	3.1235	0.7227	3.6847	3.0485	0.5052	0.2503	0.7774	1.5004	0.906	1.7087	1.3533	0.2276	2.3157	3.2631	0.5215	1.6128	0.2461	1.4931	2.1967	5.1043	0.0605	0.5212	4.7141	2.3084	0.2532	0.4753	0.9742	0.1399	5.2371	4.0402	0.6426	0.8684	2.2574	0	0.5745	0.8524	0.5765	1.1125
AC092123.1	2.7335	1.1793	2.9253	1.9087	0.4025	0.7401	2.1694	0.1729	1.2396	2.5744	2.8664	0.8739	1.4166	2.0222	1.509	0.4436	0.4121	0.2625	1.2638	0.1808	1.8004	0.9452	0.583	0.5949	3.0593	1.0128	0.5532	0.1801	0.8012	1.6291	1.5757	0.1992	0.6436	1.7822	3.9815	0.6486	0.0652	0.4502	0.2687	2.2149	2.998	0.5173	0.4766	3.6802	1.9742	0.2702	0.4366	0.3955	0.8581
LOXL1-AS1	0.4553	1.8229	0.926	4.6086	3.1303	0.7346	1.3803	5.0196	6.1641	1.2626	2.3856	4.2189	0.7976	5.6586	0.4746	4.5753	2.1619	4.3374	2.6955	6.5574	2.728	2.0328	4.3964	0.4335	1.5464	4.7091	0.5624	2.4294	1.7729	15.8108	3.4914	5.3887	4.3343	6.0697	0.4145	3.2064	0.6056	0.5942	3.5197	12.383	3.7977	4.9095	0.1362	3.3482	3.0154	2.219	0.6951	3.6342	5.8845
AL121894.2	1.2928	1.3334	3.4094	0.7109	1.047	1.5752	0.2348	1.8398	4.9323	2.4145	1.5664	0.7154	1.9295	4.7073	1.536	0.5901	1.1694	1.5366	1.6302	0.3848	0.958	1.0059	1.9498	1.2661	1.2705	1.4058	0.7064	1.5331	1.8602	1.3869	4.4715	0.7068	1.0654	1.5907	1.2106	1.972	0.694	1.1978	0.817	2.0203	3.3233	2.2018	0	2.0163	0.7878	0.3834	0.3982	2.8619	0.5619
AC004466.3	1.3564	0.7053	2.5327	0.8219	0.5136	0.4358	0.563	0.0827	0.2063	0.9186	0.3707	0.2573	0.976	0.9676	1.1301	0.4245	0	0.2512	1.7592	0.8651	2.0101	1.5507	0.4782	0.7245	0.9997	0.1686	0	0	0.2091	4.2405	0.5585	0.1271	0.6844	1.3204	1.8803	0.266	0.1248	0.3231	0	0.6056	1.7931	0.45	0.7017	0.9066	0	0	0.4775	0	0.3158
GASAL1	1.2455	0.7965	1.2273	2.0307	4.684	0.7571	0.9536	0.8766	1.5948	0.7834	0.1159	1.0281	1.2622	1.8069	1.0471	2.821	0.9363	0.6329	0.8022	1.2624	0.2744	2.6938	1.2738	2.0498	1.6498	0.9956	1.2691	0.3892	0.5207	2.1016	0.6985	0.8391	0.7371	1.5292	1.1691	0.8164	0.748	0.973	1.0721	0.8942	0.9968	0.641	0.2316	1.3084	3.528	1.7371	1.1613	0.9468	0.6584
AC026803.1	3.8612	0.9839	1.3282	1.2739	0.6823	0.6514	5.0485	0.3297	0.4111	1.1649	0.1477	2.5638	0.2161	0	0.7507	0	0.2619	0.5007	1.0224	1.0344	1.1444	1.03	0.9529	1.4438	0.4269	0.1679	2.1098	1.3736	1.3889	0.7456	4.6741	1.2665	0.2727	2.8504	1.3804	1.5902	0.1244	0.4293	0.2928	0.2011	1.4293	0.1793	0.1398	1.1117	0.4706	0.6871	0.9515	1.2067	1.2587
AC068473.5	9.9567	5.6689	6.3229	3.0563	4.2405	8.4416	4.1355	2.7685	0.7067	7.042	18.6179	7.8318	6.5442	1.5298	7.743	17.3125	5.7155	3.7737	4.1528	7.0672	7.4534	5.891	5.0405	8.3462	10.7629	3.0425	3.0132	4.2234	2.902	5.5214	6.0044	13.4989	3.1379	5.5671	3.4684	5.7946	1.2169	5.8472	2.7878	21.1982	5.8276	7.874	3.4207	7.6265	6.7829	7.9503	2.8153	4.7075	4.1112
AC007342.4	0.0759	0.0276	0	0.0358	0.0335	0	0.2205	0.2268	0.1616	0.1308	3.107	0.1008	0.2549	0	0.1476	0	0	0.2952	0.1723	0.2711	0.0562	0.3037	0.1873	0.0811	0.1398	0.7592	0	0.27	0.0819	0.0489	0.2187	0.2489	1.2866	0.0862	0.0775	0.0695	0	0	0.6906	0.1186	0.9833	0.0353	0.2199	0.0819	0.2775	0	0.0234	0.0593	0.0495
PARD3-AS1	1.7516	4.4633	6.7481	10.5672	1.857	0.591	6.1072	1.6452	1.3054	12.5317	1.6084	11.3979	1.9607	10.9333	15.8919	1.5351	1.1883	2.7254	9.4089	3.4411	4.1533	6.0743	0.2882	1.8713	7.6167	0.4571	3.637	0.9347	1.8903	2.4804	0.8078	0.9193	0	2.7851	5.5466	0.8015	0.7898	2.7264	0.7969	3.4672	4.9708	1.7899	0.1269	5.4216	3.4155	4.9871	2.1582	1.6422	1.9413
RUSC1-AS1	4.8445	2.8478	5.32	3.4888	0.9836	3.3164	6.0872	0.4368	0.4645	4.526	1.347	2.8571	1.7346	4.0006	4.5435	0.8735	0.8165	1.19	3.631	0.7792	3.3221	4.2743	0.5693	6.2365	7.7731	1.1386	1.0029	0.562	3.4529	3.5443	3.1221	0.7896	0.7439	3.8617	7.4382	2.3545	0.252	1.0204	0.7073	4.5455	4.3439	1.3976	0.6211	6.2812	2.0169	0.6158	1.8908	1.6457	2.3737
HCG25	1.1309	0.6043	0.8111	0.6804	0.1382	0.3653	0.8564	0.0822	0.1537	0.7881	0.313	0.2077	0.4579	0.5106	0.9979	0.1713	0.1143	0.2028	0.628	0.2793	0.3744	0.3209	0.099	1.1953	0.8069	0.1884	0.2498	0.1284	0.528	1.0222	0.4022	0.2368	0.4249	0.8745	0.8234	0.4624	0.0775	0.3611	0.1733	0.6517	0.9946	0.3465	0.1656	0.7101	0.0586	0.3211	0.1853	0.282	0.4235
AC135050.3	6.3619	3.8597	6.8082	4.2201	1.3531	1.855	11.8098	1.2072	1.3798	8.0227	0.3606	13.1423	3.2969	4.7065	14.2011	1.936	1.4386	0.9166	17.0246	0.6312	7.1584	8.9569	0	5.2864	7.1202	0.4099	5.665	1.0478	7.2046	4.0949	9.1003	0.4637	0.6658	5.7536	8.1834	2.0486	0.9107	1.4409	1.2507	1.8411	5.5239	1.3133	0.0853	7.7172	5.169	0.8386	3.1936	0.3682	1.9202
AC138207.5	19.659	16.8547	11.567	14.5081	8.4558	14.8369	18.5077	10.8227	9.6391	15.0504	0.9897	17.5192	24.756	14.37	13.243	6.8011	9.6515	18.1117	15.8519	8.7774	9.9669	3.7952	9.5758	10.7777	15.9191	16.4259	21.06	6.2116	22.7971	20.9787	32.2076	8.1452	16.6273	21.593	15.4574	15.5063	7.7478	15.3863	10.1018	9.5668	26.4907	21.747	2.3418	16.3853	4.0982	8.5156	14.0236	15.1577	21.8392
AC019069.1	4.1271	3.9003	5.4601	6.0226	8.695	3.6597	5.0445	11.1819	8.1121	3.318	0.0911	3.2147	7.6847	4.1119	5.4006	6.2168	9.584	13.0181	2.1317	3.0475	3.7638	6.9338	26.6387	7.928	2.5153	6.5933	3.2526	3.8118	4.9677	12.4649	5.3528	15.2553	15.3612	16.721	3.4861	3.7408	3.093	4.9415	8.3656	0.6615	8.4708	5.3823	0.0862	5.8558	5.1265	3.0365	2.0292	8.9915	5.6918
ZNF426-DT	2.4549	1.0639	2.0106	0.3857	1.3943	1.3148	3.8212	1.0481	0.4356	1.0077	8.4536	0.6986	3.0097	2.1891	2.0455	4.4183	2.2206	2.5011	2.0342	4.5931	4.3311	0.3898	2.1157	1.8734	0.4739	1.5762	0.7665	0.4159	0.3785	3.687	1.0782	4.9848	1.8167	4.8461	3.2839	2.0328	0.5648	1.6247	0.7092	2.8012	2.0194	1.8462	1.143	1.0519	9.8305	2.3923	1.9085	1.7354	0.7622
ERICD	1.6902	1.2305	2.7253	1.5435	2.0066	2.495	2.4363	1.5785	1.8839	1.8667	2.1624	2.2095	0.8573	2.143	1.7799	3.5876	1.1108	1.1643	2.5775	2.4998	1.6438	2.2896	2.3029	2.1161	1.7518	3.446	0.8081	0.9865	0.703	2.1419	2.2835	1.4899	3.3206	1.9796	0.8363	1.6436	1.0377	1.6443	1.6021	2.2286	2.6394	2.7478	0.6886	2.5093	1.6093	1.8328	1.5782	1.5682	1.6529
AC016737.1	1.3868	0.7573	1.2948	1.6341	0.0438	0.7799	3.9936	0.0846	0.2637	2.1774	0.2653	0.3947	0.4435	1.855	1.4765	0.4883	0	1.0918	2.4357	0.5307	0.2202	1.6516	0.0815	2.1695	2.7379	0.2154	0.5954	0.3524	0.8909	0.9564	1.4276	0.065	0.4198	2.3626	1.2143	0.8613	0.2552	0.1101	0.2254	1.3932	1.5278	0.3681	0.1794	2.1035	0	0.617	0.2746	0.387	0.5167
LINC01232	1.9115	0.7828	0.9393	2.4453	0.3242	0.9789	0.3533	0.9618	1.4264	2.2067	0.1502	0.6119	1.5856	2.6206	0.8185	0.4768	0.9726	0.9405	0.949	0.7163	1.0749	1.3658	2.4429	1.3128	0.8805	1.3361	1.8185	1.1536	1.3015	1.9554	1.7315	0.8957	1.6034	1.9383	1.0111	1.0387	1.3027	0.7211	1.0547	0.6845	1.6846	0.8244	0.1174	0.7862	1.3936	0.9415	0.5362	1.6535	2.0418
AC104938.1	0.3542	0.9886	1.4622	0.3339	1.0432	1.5936	1.4581	0.3025	0.88	1.2214	0.5873	0.4704	0.6608	1.4003	0.4591	1.3582	0.5607	0.8421	0.3573	1.1598	1.2249	0.4725	1.0685	1.8291	1.3054	0.4108	0.3226	1.2602	0.8495	0.836	0.2042	1.4717	0.417	0.1341	0.9649	1.0266	0.1521	1.4441	1.164	1.7837	0.7285	1.8099	1.0262	1.3174	0	0.9455	0.7638	0.8303	0.5004
AL139424.2	2.2205	1.2255	1.7247	2.2282	0.7594	1.6515	4.7088	0.367	0.3432	1.5744	1.0688	1.3317	0.5212	1.7437	0.9284	0.5101	0.1944	1.2538	1.3819	1.0234	1.38	2.1974	0.766	0.6887	2.2965	1.9627	0.7828	0.8919	2.6024	0.5072	1.7342	0.2349	0.2024	0.6508	2.5609	0.8522	0.0231	1.2742	1.3308	1.791	1.9002	2.329	2.0492	2.5522	0.7857	0.2549	2.1182	0.5596	1.0274
HLA-F-AS1	3.519	2.3131	2.1945	2.5177	1.465	2.534	1.8573	0.7782	1.6037	2.5532	0.833	1.3448	2.2529	1.754	2.2313	1.0123	2.0438	1.2638	1.9441	1.6277	2.3073	5.0988	1.2496	2.2178	1.9498	1.2332	0.8023	1.1033	1.9124	0.717	1.3572	1.0629	2.4678	1.7539	4.7583	1.4249	0.3751	1.8296	1.3438	1.688	4.2482	1.9285	0.6509	2.7061	0.1234	1.0812	1.1775	1.1472	2.3025
ZNF460-AS1	1.9689	0.9556	1.3094	1.8869	0.4639	0.4429	1.4779	0.4763	0.4542	3.0549	4.5451	1.6996	1.2489	1.8025	2.8497	0.7549	0.4007	0.5531	2.1848	1.1721	0.6808	0.7441	0.4859	1.4724	2.2009	0.314	0.7172	0.467	1.3929	1.6898	1.6268	0.5597	0.4172	1.4162	2.6816	0.5706	0.2325	1.1675	0.3484	1.6068	1.822	1.4937	0.8556	2.3621	0	0.1168	0.8289	1.0256	1.0697
AC007038.1	5.7187	2.6021	3.9342	4.38	1.1368	2.6531	5.7118	0.3052	0.7611	4.19	1.3675	1.8986	1.3603	3.9265	4.6326	1.253	0.7759	1.205	4.9215	1.915	2.5425	5.6254	0.7057	4.2004	3.5826	0.8084	0.8593	1.0172	3.8057	3.0368	3.2141	1.1255	1.9188	2.1109	4.7463	2.1589	0.6446	1.0332	0.8673	2.3087	4.4101	1.461	1.812	3.6019	0	1.7809	1.3652	1.117	2.237
AC084824.5	7.1726	5.7814	5.1107	5.6746	1.1316	3.0251	8.2803	3.6091	3.2728	11.2613	3.2344	11.2262	3.7276	3.6776	8.1345	3.7886	2.6067	1.4947	7.3647	2.2875	5.6944	4.7834	2.9503	3.9683	5.7584	1.5598	4.7591	1.1392	4.0545	4.7817	7.5309	2.3527	3.2571	8.1462	3.925	2.5789	0.99	3.7025	0.8741	1.4678	6.6375	3.3316	1.3915	6.4538	5.6195	4.1026	3.7876	4.0029	2.1711
AP001432.1	3.0518	0.8147	2.3795	1.7261	0.719	1.945	0.1478	0.8686	0.3249	0.8769	0.5449	0	1.3664	1.6509	0.1319	0.7801	1.7943	0.3957	0.3848	1.0901	1.0553	4.4776	0.6695	0.8694	2.6242	1.0619	0.3335	0.5429	1.8297	1.7024	1.0555	0.4004	2.012	3.0039	1.3509	0.5586	0.5897	1.2441	0.6171	1.1658	1.8828	0.4725	0.4421	1.0984	0.248	0	0.4387	1.4307	1.1275
AL021392.1	2.1525	1.4104	1.7523	2.046	1.5373	1.0692	1.2639	0.2144	0.4965	1.4998	0.0686	2.1915	0.9236	1.9034	3.0457	1.8275	0.6084	0.6978	1.1807	1.1212	1.0102	1.7944	1.1805	2.8937	3.715	0.5149	0.9409	0.5743	0.271	2.6094	2.3575	0.9649	0.3041	8.1286	1.0811	0.7388	0.3928	0.7977	0.6937	0.6728	0.9517	0.3833	0.026	1.1104	3.1917	0.4788	0.7404	1.4015	1.1812
AC078864.1	71.9086	25.6493	72.3567	5.3565	33.4087	27.6549	125.18	9.7041	0.33	51.8312	5.8504	63.5255	39.7829	46.6905	52.8946	13.9218	6.3081	8.7077	4.5336	7.7497	31.8473	51.6763	13.9389	51.1053	135.161	22.1088	20.2105	5.6971	11.8186	0.133	25.1328	12.1999	1.7515	1.5254	48.2302	11.4413	0.8652	11.2572	14.7289	0.1076	26.5156	5.7587	21.7749	108.059	4.5329	3.677	15.9762	2.7446	11.5856
PANTR1	6.3494	8.7904	10.8808	2.8738	15.4064	13.9597	6.1856	6.1066	3.1848	8.7332	1.8242	20.1362	8.9802	5.7517	8.2815	10.5593	11.7716	10.2019	3.0825	18.3398	13.0273	17.1287	1.386	27.6723	10.3477	5.8472	11.7922	5.3821	4.9102	0.0959	3.561	12.0823	6.9623	4.25	13.6214	9.6815	1.7238	10.2705	2.3335	3.797	6.7595	15.6244	5.52	9.2233	21.678	4.5378	7.1419	10.1366	2.4957
AC006449.2	1.5238	3.3282	4.6425	1.8468	1.731	3.1828	1.6603	2.0447	1.3906	2.4394	1.9157	1.3009	1.7057	0.6794	3.5269	4.4119	2.2152	1.129	1.0705	0.7776	1.9356	3.9197	2.149	1.7443	3.2088	5.6809	0.8326	1.1617	1.4095	1.4012	0.5019	2.2849	2.3065	1.607	2.6684	1.6935	0.7712	1.9362	0.9079	2.7215	2.2831	2.2245	0.8671	2.8989	0	7.1664	1.1399	0.6803	0.9935
AC087392.5	0.6491	0.5513	3.1257	0.5099	1.2425	0.73	1.1787	0.3695	0.3455	1.3987	0.4139	0.2873	1.5741	0.135	1.2619	0.7111	0.2935	0.8416	0.4911	0.7728	0.8016	1.7314	0.8899	1.1557	0.7176	0.1882	1.8915	1.7318	0.8561	2.0889	1.1224	0.8516	0.917	0.2457	0.5525	0.297	0	0.9622	0.5742	1.3524	0.9343	1.8089	0.0783	1.0123	0	0.1925	1.1996	0.6762	0.5642
AC092757.2	1.3371	1.2168	0.9199	1.4967	0.2953	1.4098	1.0319	0.2141	1.3346	1.5847	1.7266	0.222	0.2806	1.4605	1.4081	1.1901	0.2268	0.4334	1.0748	1.4925	1.7338	0.8917	1.2374	0.9821	0.4927	0.7269	0	1.3378	1.7435	2.3667	3.9501	1.0964	0.8264	2.2779	1.4512	0.4589	0.0538	0.9291	1.5842	0.6094	0.6187	1.3197	0.2421	0.4211	0	0.5948	0.4119	2.7423	1.3621
AL031848.1	2.4113	1.0972	23.2243	0.2841	1.3315	0.678	1.5326	0	0	1.429	0	0.8006	0.3374	0.1881	1.758	0.1651	0	0.1954	0.228	0.2692	5.5836	2.8142	0	0.644	3.4433	0.6555	0	0	0.3253	0.388	0.1737	0	0	0	2.1552	0	0	1.0054	0.1143	0.9421	0.3719	0.14	0	0.6509	0	0	0.0928	0	0
AC145207.8	0.9396	0.342	0.5171	1.0628	0.249	0.7397	0.6825	0	0.2001	0.4859	0.3595	0	0.3155	0.4692	0.4871	0	0.6374	0.1218	0.0711	0.1678	0.2785	1.7545	0.1546	0.7027	0.4847	0.6539	0.1027	0	0.6084	0.7257	0.4333	0.2465	0.1327	0.1067	1.5356	0.6019	0.4237	0	0.1425	1.9577	0.5797	0.1746	0.5444	1.4879	0	0	0.2315	0.1468	0.9188
AC138150.2	0.6665	0.5014	2.1092	0.356	1.3544	0.7246	1.8559	0.626	0.7569	2.2981	0.578	2.6848	0.7461	1.47	3.1963	0.5355	0.4522	0.5185	0.5547	0.9126	0.7243	0.6816	0.1828	0.7833	0.7205	0.6184	0.7769	0.7509	1.1828	0.286	0.8452	0.7579	0.3139	1.2616	2.0425	0.4473	0.3435	0.5187	0.2022	0.8332	1.0691	1.1971	0.0322	1.5192	3.899	0.2767	1.2045	0.5555	0.3187
AC016026.1	0.9289	1.0322	0.9754	0.3572	0.3348	0.7698	0.8789	0.1044	0.1431	1.5276	0	0.0325	0.2052	0.7171	0.7604	0.2008	0.1161	0.1109	0.111	0.5894	0.4528	0.2934	0.181	0.6921	0.7657	0.2339	0.0401	0.1739	0.4397	0.7395	0.5495	0.0802	0.259	0.1805	0.9239	0.3356	0.0236	0.5028	0.2039	1.0696	0.558	0.6585	0.0443	0.2463	0	0.0435	0.256	0.1528	0.4861
AC090246.1	4.4703	2.5313	2.3919	1.0535	0.5485	3.4914	1.804	2.0145	1.1899	2.5689	1.7104	0.8245	1.6679	1.7052	1.1266	2.1766	2.0218	3.3812	0.7516	0.6653	2.0242	1.6562	0.2043	4.1125	1.4643	0.324	2.3069	1.9879	2.1441	0.3197	0.7158	3.0955	2.1051	3.3847	2.0295	1.932	0.7199	2.6231	0.7533	6.3389	2.2982	2.9992	0.1799	1.7877	0	0.4419	1.071	0.9702	0.7286
AC016747.1	16.5381	14.4062	13.8122	8.0033	8.9593	16.3993	5.1538	16.3443	22.0642	10.6183	6.3407	11.4106	17.3503	10.7266	8.1816	13.5883	14.3591	16.5903	4.5569	18.1106	14.7255	19.9706	26.7901	18.4138	20.1395	15.5998	15.3401	18.0381	16.256	8.9585	8.121	8.0588	20.6479	21.7589	15.7464	16.366	3.9784	21.5654	16.489	27.7234	19.3561	22.1917	8.4289	15.0153	26.2518	9.8098	6.2159	18.2655	10.649
ATP1A1-AS1	2.6116	2.9319	3.0671	1.5185	1.6927	1.862	1.5247	0.7329	0.5284	2.0127	3.3929	1.6584	2.691	1.5996	1.6555	1.6533	0.8224	0.9125	2.4744	2.441	2.0316	3.9879	0.9905	0.9604	2.1466	1.0226	0.7202	1.1722	1.3111	1.2044	1.7446	4.3444	1.0459	1.8064	3.0499	1.128	0.3826	1.8362	0.6539	1.1188	2.0629	1.8441	1.1608	1.7364	0.3669	0.5357	1.0751	0.8136	1.2889
AL109811.2	1.9457	2.5674	5.0195	1.7195	0.8595	2.4618	5.3441	0.5711	0.5179	4.8218	1.3958	3.795	1.3612	3.2639	1.4973	0.7993	0.9075	0.7095	3.4961	1.5203	3.4241	2.1896	1.0004	1.8188	4.795	1.7983	0.5316	0.4326	2.2309	2.5047	1.8927	1.5955	0.0859	1.3121	4.3476	0.6678	0.3525	1.014	0.5994	2.3438	2.5508	0.9037	0.6605	5.2083	0	0.9738	2.21	1.3302	0.9514
AC092111.1	0.7876	1.4909	1.4955	0.3712	0.3062	1.2402	0.7209	0.7398	0.587	1.5208	0.1085	0.5021	0.4056	1.1996	2.2868	0.3969	0.0641	0.3677	0.584	1.1816	1.0972	0.8825	0.6739	1.481	1.2191	1.4525	0.2066	0.6165	0.612	2.1901	1.8525	1.3641	1.0015	1.5744	0.7402	0.4181	0.1015	0.4729	0.3464	1.0175	1.3023	0.3512	0.2282	2.4606	0.6527	0.9811	0.2426	1.1569	0.5238
AL590666.1	0.733	0.6226	0.5043	0.5758	0.2159	0.5496	1.6861	0.5216	0	1.5796	0.187	0.4867	0.9572	0.1525	0.7917	0.1338	0	0.3168	1.294	0.8727	0.9052	1.6295	0.201	0.6526	1.5307	0.5314	0	0.4346	0.4395	0.7863	0.7042	0.4809	0.1726	1.11	1.6223	0.3354	0.0787	0.4075	0.3706	0.8909	0.7537	0.227	0.3539	1.9346	0.2978	0	0.8279	0.1909	0.3982
AC008514.1	0.8883	0.1617	0.3056	0.1675	0.0785	1.1989	0.3226	0.1896	0	11.9832	0.3739	0.118	0.0497	0.1663	0.2303	0.5839	0.0603	0.2304	1.2097	0.6346	0.5266	0.4147	0.5115	0	0.2946	0.425	0.0485	0.158	0.0639	0	0.5633	28.0296	1.2549	0.3531	0.4083	0.1219	0	0.0988	0.6399	0.2314	0.9864	0.949	0.3217	0.5115	0.2165	0.7904	0.4104	0.0694	0.1737
LINC00173	3.003	15.0383	3.769	1.0711	1.1832	3.0808	2.5793	1.4034	0.3889	27.5297	0	10.9132	4.5198	13.1973	16.8052	3.401	1.4591	2.3942	3.3159	1.8844	9.2015	3.2747	0.2003	3.7069	27.5619	0.2295	1.9292	0.6497	1.0073	1.8546	9.2169	0.9584	0.086	2.1201	15.2549	1.2999	0.8103	1.6017	0.2	1.2684	2.5036	1.3383	0.0882	14.2114	4.649	1.9137	2.9126	1.4585	1.0451
AL451123.1	0.8417	0.601	1.7817	0.4221	0.7103	0.4794	0.3645	0.387	0.1608	0.8372	0.1858	0.5231	0.9784	0.7679	0.5455	0.6798	0.776	0.5667	0.6246	0.5493	0.7996	0.5397	2.1927	0.6283	2.7121	0.474	0.6899	0.5087	1.2965	0.2084	0.479	0.3469	0.2211	0.6986	1.0692	0.4395	0.1425	0.8458	0.4173	0.8713	1.2516	0.9975	0.1837	0.5476	0.1184	0.5281	0.1296	0.5649	0.4643
AC124283.2	2.3289	0.4844	1.3733	2.5089	1.0288	0.7483	0.4833	0.5682	1.594	0.2868	1.0183	0	2.0482	0.623	3.2341	1.6401	0.2257	0.4314	1.8878	0	0.9861	1.775	0.2737	0.3554	0.7356	0.5788	0.3636	0.2959	0.8377	2.1414	0.5753	0.4365	1.175	3.4007	1.1894	1.0657	0.3214	0.7398	0.1261	1.733	1.642	1.5453	0.9638	0.479	0	0.592	0.7174	0	0.5423
BX284668.5	1.2417	1.338	1.2301	0.9832	1.6017	1.2848	1.7138	2.057	0.7404	1.4557	0.4751	3.5619	0.9452	1.6432	1.3519	0.4081	2.3924	0.7728	1.5783	1.9959	1.877	0.5631	0.5312	0.5572	1.7389	0.9289	1.6827	0.3092	0.3216	2.3658	1.2598	4.2359	0.3859	0.3385	0.0507	0.7501	0.5759	2.1813	0.2825	0.3881	0.6129	1.3843	0.018	2.3597	5.2059	0.3977	1.0251	0.6209	0.5505
CD27-AS1	16.6575	17.12	18.1692	17.2343	7.4542	13.7198	14.6186	14.5009	16.7625	22.0847	15.5897	22.4088	10.3105	10.3975	18.6203	17.3835	10.4812	7.6679	12.5439	7.852	10.9664	24.8812	11.2325	16.109	20.3437	10.0999	16.2244	10.0236	12.3962	28.4785	12.6897	14.421	14.1284	20.8877	17.6004	9.0252	2.0642	9.1051	7.9357	9.9511	15.1664	11.2175	5.6061	31.9928	5.7356	14.6556	7.6012	12.7485	7.3476
IRAIN	1.5838	0.3459	5.4478	0.1493	0.2799	1.0687	0.8053	0.4057	0.6745	2.0478	0.2424	0.4206	0.8864	0.7909	2.4633	0.8675	0	1.4375	0.2396	0.2829	0.4694	1.0562	1.3029	0.6768	3.2684	1.1022	0	0.2817	0	3.6699	1.0956	0.2078	0.895	0.1799	1.456	1.1596	0.4081	0.8804	0.2402	1.65	0.7817	0.8828	0.1147	0.684	0	1.1273	0.1951	0.2475	0.3098
AL031058.1	0.9531	0.4337	1.3114	1.9654	2.1052	0.871	0.9087	2.1872	1.5222	0.9243	9.208	2.6106	0.1334	1.413	0.2316	1.0442	0.2425	2.5489	0.9464	3.7236	0.618	1.8274	4.0184	1.591	0.8781	2.5391	3.255	1.5894	1.5	0.1534	0	5.3929	4.2079	0.7442	0	0.7087	2.8011	2.2519	2.0327	0	1.5435	3.099	0.9923	1.3293	0	1.166	0.5505	2.0479	2.8739
ZNF793-AS1	1.3554	1.0142	2.4865	0.8873	1.5301	1.228	2.2699	1.6396	0.5612	2.6936	11.3513	1.35	2.1493	1.7861	1.1224	1.4436	0.9195	0.6835	1.3673	2.0172	1.2833	1.607	1.9822	0.6838	1.6927	0.786	1.0286	0.5358	1.1647	11.9231	1.6494	2.4699	1.2234	2.5656	1.3461	0.8614	1.0186	1.3395	0.9993	8.7078	2.6015	1.9586	2.7268	0.7859	0	0.871	1.5773	0.8237	0.7118
LIX1L-AS1	0.7166	0.6166	0.4034	0.568	0.3453	0.4946	0.8399	0.1113	0.052	1.109	0.1371	1.0814	0.3281	0.5286	1.0977	0.339	0.1989	0.1901	1.0227	0.4072	0.6275	0.1521	0.0268	0.957	1.2124	0.3258	0.3382	0.2028	0.5038	0.4613	1.4082	0.4701	0.1611	0.6844	1.1978	0.6111	0.2832	0.2897	0.2223	0.2715	0.7033	0.3631	0.0708	0.8792	0.8733	0.029	1.0034	0.3817	0.5097
AC016735.1	0.4464	0.325	0.9213	0.2104	1.1832	0.7531	0.9728	0	0.7129	0.3848	0.3416	0.8892	0.4997	0	1.7357	0.489	0.6057	0.2894	0.6755	1.5945	1.3231	0.2977	0	2.623	1.4805	0	0	0	0	0.2873	1.2866	3.5141	0	0	1.14	0.4085	0	0.2482	0	0	0.2754	0.2073	0	2.8919	6.5284	0	1.2376	0	0
AL359513.1	0.9497	0.6914	1.0454	2.059	0.5034	0.534	0.6209	0.8109	0.8089	1.9647	10.2469	2.0179	1.8072	1.8969	0.7386	1.1445	1.2886	2.3397	1.6526	1.0177	0.8445	1.6467	1.25	1.0146	2.0299	0.4957	1.9719	4.7301	1.0249	16.3825	2.1898	0.9968	1.0733	2.0494	1.6492	1.5645	0.2447	0.2112	0.4321	3.0672	1.1718	1.4116	0.6878	1.0938	0.2315	1.183	1.7552	1.9292	1.4241
IQCA1-AS1	4.1107	2.2052	2.5303	0	0.669	1.2166	1.0215	1.9397	0	0.1865	0	1.5802	1.4531	0.9453	0.1402	0.1185	0.4403	0.8416	0.2455	0.966	0.8016	0.4329	1.7798	3.5827	2.8702	0.4705	0.3547	0.3848	2.257	0.1393	0.4989	0	0.4585	0.3686	1.105	2.7721	0.209	1.8041	0.4922	0	0.9343	0.7035	0	1.791	0	0	0.1999	1.0142	0.7758
AC018653.3	6.2814	4.9324	8.7044	13.3648	3.409	3.5322	5.2471	2.9116	7.6431	6.9227	0.5493	3.5154	3.2644	4.705	5.1174	3.0966	1.2175	3.6069	3.5303	2.7244	3.1916	9.5151	5.2412	6.3273	6.8782	2.771	1.8142	2.7933	7.0692	7.3931	6.3624	0.7064	6.5287	10.8029	6.2788	2.2174	0.1734	3.6415	3.7425	0.9816	10.9059	5.21	0.3574	6.8791	0.4374	0.7984	0.9398	4.1365	3.8027
AC011815.2	0.7852	0.5336	0.7923	0.7155	0.1388	0.2649	1.2358	0.2458	0.0557	1.7598	0.3205	0.5909	0.4688	0.3594	0.882	0.172	0.071	0.1018	0.1584	0.3272	1.1637	2.374	0.0431	0.9508	1.1575	0.0683	0.1716	0.7449	0.998	0.5728	0.694	0.1717	0.074	0.5054	0.9625	0.1916	0.0843	0.2328	0.0397	0.1636	0.323	0.1216	0.1517	0.7725	0.0638	0.0932	0.2903	0.1227	0.2048
AC093797.1	2.9569	1.5499	3.865	0.1951	1.6719	0.8979	1.1169	0.3535	0.3778	1.6057	0.2715	0.2356	0.5627	1.8826	1.8779	0.5507	0.2006	0.3067	0.3803	1.5842	2.8483	2.8001	0.973	0.3159	2.2229	1.0288	0.1616	0.526	2.5953	0.4568	0.5795	0.5043	0.1671	0.7724	1.6914	1.3531	0.1333	0.5589	1.1659	1.5094	2.5174	0.7966	0.4283	1.2345	0	1.4733	0.4918	0.6931	0.6554
AC090198.1	7.098	4.8569	5.3776	5.124	3.9889	7.4272	2.0069	4.5648	3.8742	3.3883	2.5267	1.7301	3.0172	3.5332	3.1442	4.8231	2.4991	2.2718	2.6171	4.9744	6.0917	4.6737	4.287	2.4717	6.4069	4.1033	1.7674	2.3574	3.8461	5.2627	2.9522	4.8037	4.3157	2.5766	5.4838	4.5226	1.4758	6.1186	3.8835	6.3651	7.3168	4.5072	2.245	6.9202	1.2045	3.7173	2.1311	3.4749	2.6213
AL358781.2	1.5657	0.4071	1.5388	1.3705	0.5928	1.3836	1.9497	0.191	0.1191	1.8316	0.9414	1.1881	0.8763	1.5358	0.7248	0	0	0.435	0.6769	0.5992	0.8287	0.1492	0.552	0.5974	1.4012	0	0.1222	0.1989	0.8851	1.0078	0.2579	0.2935	0.158	0.6351	1.2566	0.8188	0	0.2487	0	1.1651	0.6899	0.7272	0.324	0.4025	0.2726	0	0.8957	0	0.4375
AC001226.1	0.3926	0.4287	0.9452	0.6476	0.1734	0.1104	1.2832	0.3352	0.1045	1.7765	0.3004	0.6517	0.2197	0.4901	1.1448	0.1075	0.2663	0.3818	0.3713	0.3505	1.309	0.2618	0.1615	0.8388	1.3743	0.1707	0.3218	0.1746	0.6355	0.379	1.6972	0.1288	0.1386	0.6688	1.5037	0.1796	0.1896	0.5456	0.2233	0	1.9375	0.2735	0.2843	0.3532	0	0	0.1209	0	0.3199
AL353622.1	11.8035	4.1779	12.0495	5.0761	0.6728	2.6611	23.7857	1.4398	0.666	11.9092	2.8096	5.6704	2.5268	6.1793	1.6568	1.3706	1.8081	1.3753	5.926	1.8457	5.5218	3.4461	0.3132	1.017	17.9803	1.041	1.0105	1.6448	8.6485	2.6259	9.093	0.9278	0.6148	2.1622	8.6678	1.6926	0.6307	1.8748	0.3094	2.5217	6.745	6.6701	0.6303	8.0266	3.3146	1.3067	2.7311	0.68	1.8263
MAFG-DT	1.5632	1.5445	1.5747	6.2889	1.2825	1.9151	1.0341	3.337	7.2815	2.719	0.2991	4.1519	1.7185	4.8788	3.1839	0.8868	6.2114	1.7736	3.4002	1.8944	2.1512	0.4096	1.7453	5.7259	2.1191	1.0199	5.2165	3.7241	1.3857	8.1932	7.241	4.8711	1.262	1.2047	1.3117	2.3504	1.2227	2.1415	1.3547	3.3153	1.9977	1.8671	2.325	2.6724	10.6143	3.2785	1.6509	6.4558	3.9856
AC026412.3	3.121	1.6694	1.3146	3.5424	0.3939	1.8267	1.4805	1.1149	1.831	1.5922	0.7311	0.4229	1.5685	2.0674	1.6924	0.4536	0.5185	0.702	0.4337	1.5357	2.407	2.0814	1.6767	1.6332	3.1453	0.4155	0.174	0.963	1.0311	0.082	1.2484	1.8803	1.9347	1.7	2.4073	1.6031	0.1436	1.4163	1.2075	0.7299	2.2398	1.5976	0.2537	2.6363	2.4064	0.3967	0.5101	1.1446	0.6229
AL355385.1	1.8107	0.9416	0.7118	0.3658	0.2285	0.2909	1.0334	0	0	1.3378	1.2866	0.5153	0	1.2917	1.0058	0.1417	0	0.1677	1.3699	0.693	0.575	0.1725	0	0.1382	1.2392	0	0.1413	0	0.4652	2.664	0.4473	0.5091	0.1827	1.0282	1.5854	0.9469	0.1666	0.2876	0	0.1347	0.6383	0.2403	0.1873	0.8379	5.9897	0	0.6374	0	0.4216
AC012409.3	5.7158	6.3597	7.0483	1.1691	1.191	4.8516	6.3453	0.5525	1.2056	12.4567	0	7.5906	2.2936	1.0771	11.3921	1.2405	0.6585	0.3496	3.998	3.9484	5.5938	3.5242	0.1774	4.263	10.5318	0.7036	2.8875	1.4388	1.8621	1.3883	3.73	2.6177	0.3809	1.4086	7.3809	1.2831	0.4168	2.6379	0.2862	1.1235	2.7279	2.1039	0.3515	6.288	0	1.6312	4.1193	1.2639	0.7383
AC132938.1	2.6449	0.7488	1.8196	0.1385	0.2596	0.8263	4.5896	0	0.1564	2.0265	2.0239	1.5611	0.4934	0.9172	5.5231	0.161	0.5981	0	0.7782	1.0497	1.5243	0.196	0.2418	1.0989	2.2743	0.5113	1.2846	0	0.3171	2.0808	4.2351	0.3856	0	0.3338	0.4503	0.1345	0.2839	0.3267	0	0.6123	0.5439	0.1365	0.3193	5.3943	5.7305	0	1.3579	0	0.2874
LINC00926	1.9608	0.8712	2.9954	3.9413	0.3821	0.9891	2.2202	0.6894	2.41	2.8832	0.7392	1.3977	0.7746	2.6458	3.4197	0.537	0.1956	0.4487	8.1264	0.9527	2.0939	2.3076	1.5656	0.9242	2.3059	0.765	1.2605	0.359	1.2551	2.4499	2.1941	0.3972	5.6217	3.6515	2.0471	0.7653	0.2507	0.4969	0.7216	1.5771	5.0166	1.6206	0.5221	3.4351	0.8786	0.4875	0.8172	1.2391	0.9776
ZNF30-AS1	1.1849	0.6162	1.281	0.0798	0.1496	1.0471	0.5533	0.2891	0.0901	1.1673	1.3601	0.1124	0.8527	1.6906	0.5485	0.5563	0.4593	0.1097	0.1281	0.3023	2.1323	0	0.4178	0.3617	1.0605	0.0736	0.0925	0	0.0609	0	0	0.3331	0	0.9613	0.951	0.5422	0.1636	0.2823	0.0642	1.5872	0.731	0.4718	0.3678	0.3655	0	0.6024	0.1043	0.3968	0.0552
ZFAS1	9.9117	9.3373	7.2477	14.7344	6.9359	4.5291	3.7939	18.0836	24.3161	13.1993	2.8625	20.2762	9.8912	7.0286	8.9959	8.5585	7.9498	3.6295	4.0045	16.2359	7.6272	5.7276	4.3333	4.6489	10.3388	8.2069	16.6787	4.7302	5.0484	2.8746	4.43	10.9844	7.7473	7.919	5.8941	3.4002	9.548	6.7902	3.869	2.2402	4.6312	5.6026	2.1656	7.675	36.6885	9.4302	5.0598	6.2529	5.2882
AC011523.1	0.5398	0.1965	0	0	0	0	0.8822	0	0	0	14.2502	0	0	0	0	0	0	0	0	0	0	0	0	0.1442	0	0	0	0	0	0	0	0	0	0	0.1378	0	0	0	0	0	0	0	4.6912	0	0	0.7204	0.2494	0	0
AC010538.1	1.169	1.214	1.6321	1.0858	0.805	1.5854	2.3602	0.3523	1.3728	1.2003	0.5394	1.1643	0.7312	1.4379	0.7576	0.5838	0.6764	1.5827	0.9105	0.6755	1.121	1.1694	1.3011	1.5612	2.3567	0.8674	0.7891	0.948	1.41	0.9516	1.0901	0.406	0.7043	1.5815	2.2127	0.7867	0.155	0.8983	0.6649	0.6269	2.2909	1.6769	0.3984	3.6506	1.1733	0.4283	0.8685	0.6716	0.6949
AL135818.2	0.9004	0.2731	0.5162	3.5365	0.2652	0.4219	1.1446	0	0.1598	0.7114	0.1148	0.9964	0.6719	0.0937	0.4863	0.0822	0.6108	0.4865	2.2139	0.536	0.2224	0.3002	0	0.7215	0.553	0.7832	0.738	0.1335	0.7018	1.1591	1.9031	0.0984	1.272	1.2783	1.1497	0.4807	0.2417	0.4171	0.1707	0.3127	0.8332	0.4182	0.3261	0.3781	0	0.1335	0.8321	0.2345	0.4403
TMEM51-AS1	2.4123	2.2419	4.0972	0.4165	1.2023	1.0981	2.0283	0.2867	0.5268	0.8721	6.2275	0.7921	0.9347	0.9983	2.9548	0.6389	0.3177	0.401	0.8056	2.1225	2.7565	5.7043	0.4216	0.4815	5.9069	1.6641	0.3476	0.5501	1.3191	0.9157	2.1444	1.2695	0.8426	0.5871	1.0606	1.4759	0.4496	2.1073	1.0118	0.4373	2.2296	0.5295	0.4064	1.7173	0.3338	0.3931	0.4518	1.3739	0.2218
OSER1-DT	9.0005	4.1934	4.8212	1.7541	2.6962	5.5314	3.3355	3.7547	5.5351	5.9668	5.8271	4.6077	4.8387	5.2464	4.7049	5.0305	4.2493	2.2494	1.7197	6.4113	7.1784	3.0929	2.5623	4.3063	4.7516	2.4853	4.0733	2.8822	2.5415	4.7172	3.1156	6.2049	2.4266	3.8236	5.1526	3.3955	1.6854	6.9005	1.8496	2.8095	2.5291	3.2711	1.7085	4.0801	21.2964	3.8207	3.3509	4.6524	2.3405
AC002128.1	3.4363	1.5541	3.5819	1.5705	0.506	1.6981	3.8576	0.3112	0.6652	1.5259	4.3825	0.8297	1.1656	1.6249	2.092	0.2852	0.3532	0.6751	4.5299	1.0228	2.0833	1.5278	0.0857	2.2806	3.185	0.9511	0.3983	0.2778	2.0227	1.4745	1.8608	0.2732	0.8827	2.6018	4.4143	0.9054	0.2683	0.521	0.7896	2.7663	2.8909	0.6771	1.169	5.3968	0.2538	0.3706	0.5774	0.7322	0.8825
AC092112.1	5.9511	0.5416	0	0.5454	0.3651	0.5577	0.7205	0	0.704	0.4275	0	0.2195	2.1279	0.2064	1.3927	0.3622	0.5607	0.9645	0.5003	0.5905	0.3675	0.2205	0.272	0.2649	0.4873	0.1438	0.542	0	0	8.4058	1.7152	0.4338	0.9341	0.9387	0.8443	0.6052	0.0532	0.5514	0.3134	0.5167	1.4278	0.6143	0.2993	0.6545	0	0	0.2546	0.1292	0.485
AC087477.2	1.7177	1.8704	2.1476	0.345	0.6796	1.6295	1.1555	0.88	0.7077	3.8432	0.3086	1.5373	2.1986	1.3146	1.1519	1.1454	0.4763	0.949	1.0114	2.2675	1.14	0.5977	0.6512	0.8059	1.6073	1.2149	0.7917	3.1086	0.3224	1.8555	1.2657	1.8617	0.8335	0.6786	3.5474	0.4648	1.092	1.0794	0.2492	0.568	0.7095	0.6869	0.2596	3.2148	0.3823	0.8107	0.8374	0.9103	0.3603
CYTOR	1.6504	1.5715	1.8388	3.2918	2.4645	1.2307	0.708	2.4176	2.502	2.322	0.7115	2.7515	1.69	2.2021	3.7123	2.843	1.3752	1.8453	1.934	2.611	1.5419	1.4595	2.2874	1.8909	1.1128	1.5292	2.2512	1.0583	1.3444	8.8023	3.0574	4.6091	2.4667	3.7488	0.9681	1.5843	2.2166	1.8914	1.9407	0.1371	1.8334	2.1969	0.3096	1.5409	16.9142	3.0858	1.6448	1.5277	2.0408
AC139768.1	8.3648	5.4036	13.1302	3.1096	7.2862	7.6188	7.103	4.4766	3.7003	4.6714	10.5479	12.7511	5.2091	4.0446	10.2309	8.7765	5.275	2.7497	5.0361	2.9457	10.3884	3.7713	4.9429	13.5935	8.4227	4.458	4.4419	2.6196	3.6023	5.3083	2.3769	7.4196	2.8295	4.8839	6.7995	4.2051	1.7075	6.7458	2.9035	8.3463	5.3785	6.1837	9.8553	8.3532	2.7281	6.4991	4.246	4.4183	3.9173
ZNF529-AS1	2.8641	1.7903	3.5028	2.5634	2.0959	2.245	3.4568	1.9268	2.5411	3.2917	3.7302	1.8057	2.623	3.431	2.6997	2.2344	2.0411	2.7008	3.2503	2.3767	2.7867	1.9872	2.4513	2.4571	2.8998	1.3589	1.3753	2.5987	2.0397	5.8284	2.9851	2.2964	1.3896	3.8935	3.4427	2.555	0.9038	2.3319	1.3821	4.1291	3.2304	3.1309	1.5505	2.3323	3.5963	2.2909	1.5951	2.848	1.7824
AC004908.1	9.9734	4.5559	10.0901	5.5302	2.0733	2.9692	2.4149	1.0019	2.2903	7.2484	7.7067	1.0388	2.4079	13.4272	3.802	1.7139	0.5307	1.3946	3.5509	1.397	5.7962	4.1733	0.3217	1.7759	5.477	1.1908	0.9617	1.0436	2.8138	1.2587	2.0291	1.2829	4.2822	6.8852	8.4897	2.9531	0.3149	2.7178	1.4088	5.1952	4.1019	1.9983	2.691	2.6746	0	1.392	0.5421	1.2223	2.8049
AFDN-DT	1.8307	2.0269	3.4809	0.2157	0.4717	0.7149	1.3575	0.5102	0.2301	3.6929	1.0993	2.2285	1.9353	0.8411	1.417	0.7381	0.2587	0.3132	0.4617	1.0444	2.2985	1.8652	0.2719	0.3395	4.9847	1.6477	0.9169	0.6558	1.253	0.1473	0.4544	0.8507	0.4849	0.2021	1.4934	0.256	0.1474	1.0742	0.617	1.4834	2.3215	0.4252	0.5524	1.8851	0.5578	0.4298	0.6579	0.2582	1.0526
AL121999.1	0.956	0.116	0.4385	0	0	0.3584	1.5046	0.136	0.5089	0	0	0	0.7134	0	0.2065	0	0.4324	1.033	0	0	0	0.2125	1.5729	0	0.7046	0.5544	0	0.2834	0.1146	0	0	0	0.2251	0.181	1.1393	0.1458	0.3079	0.1771	1.6915	0	1.1796	0.8881	0	0.4588	0	0	0.1963	0	0.1039
PIK3CD-AS2	6.9855	9.228	13.0219	3.6641	8.5607	12.2281	11.376	10.6307	4.3185	30.3496	0.0431	21.8451	15.7646	4.3603	4.673	9.6893	17.1978	9.7881	3.0687	14.2866	10.8532	7.7393	6.0246	7.6435	23.5419	4.9494	9.1115	9.4195	1.8238	6.1643	4.0917	13.7477	1.9897	4.3507	6.1573	9.3835	1.1975	11.462	5.9379	7.6884	3.0584	10.1004	0.6936	3.6496	59.7311	13.7338	14.8541	6.6903	2.3138
AL358472.3	2.5493	2.4128	2.8061	1.2015	2.3649	2.2937	3.8887	1.3061	0.8143	3.7357	1.4631	3.8933	2.1402	5.8877	4.2955	2.5135	2.4212	3.3055	4.1468	2.9594	3.0224	2.7202	0.6292	3.9492	3.7578	1.5523	2.6467	2.4941	2.1092	5.9072	6.9068	3.1775	1.0805	5.3564	2.4739	1.8665	1.56	2.5509	0.7733	5.0462	2.6737	3.5524	1.2001	3.2113	2.4855	0.9073	2.7485	2.3902	5.3185
AC010973.2	1.0322	0.5323	1.0059	2.4324	0.418	0.1935	0.9372	0.1469	0.3205	2.076	0.4936	1.1423	0.2407	0.2148	2.5084	0.2356	0.1167	0.2231	0.7484	0.1536	0.8923	0.5736	0.0708	1.1946	0.8241	0.0374	0.141	0.153	0.7426	2.1592	0.595	0.1693	0.4253	1.8072	1.8451	0.4723	0.0277	0.2869	0.2283	0.5377	0.9552	0.1998	0.1557	1.424	0.1048	0.1531	0.6094	0.336	0.5608
HOTAIRM1	2.4752	1.2614	2.7732	3.3998	0.4061	1.4714	4.238	0.3321	1.1294	2.8346	0.1894	1.4557	1.5832	1.4567	4.8122	2.8278	1.0555	1.8798	5.4039	2.2103	0.9432	2.1695	0.1164	8.0842	1.6419	0.3383	0.8501	0.4403	1.8825	6.5093	4.4435	0.7887	0.9491	6.3854	3.3952	3.2038	0.3416	0.3931	0.7508	4.9732	3.8394	1.5767	0.8963	8.0939	2.8442	0.3775	4.2043	1.7681	2.0748
AC016252.1	1.3392	0.8937	0.6142	1.6832	0.2958	0.6276	2.513	0	0	3.7517	0	1.0374	0.1249	0.418	1.3018	0.1223	0	0	0.0844	0.1993	0.4962	1.3397	0	0.9538	2.2208	0	0.2439	0.397	1.8467	0.431	0.772	0.4393	0.1577	0.1267	3.0779	0.3064	0	0.4963	0.1693	0.4651	0.6885	0.311	0	1.446	0	0	0	0.1744	0.2183
LINC02298	1.7711	1.6978	3.0868	1.0017	1.1345	1.245	1.7261	0.9704	1.6029	2.5827	0.7002	2.6657	1.5199	2.0084	2.8886	0.7761	0.5407	0.4593	0.603	0.8962	2.2967	4.4097	0.3157	0.7884	2.5237	0.7318	0.8871	0.5776	0.9238	1.216	0.7487	0.9489	0.8341	0.9387	3.9049	0.7159	0.4183	0.6892	0.2015	0.2306	0.8195	0.3016	0.1176	3.1554	1.8348	0.893	1.1002	0.369	0.2213
AC009237.14	0.9956	1.6429	1.4155	0.6569	2.9027	2.8366	0.5785	0.255	5.7592	2.6317	5.8661	1.1899	2.4145	2.4029	0.8603	1.9996	4.0974	7.272	0.8788	0.5927	2.2623	2.2132	6.4974	3.829	4.2069	2.2228	3.5541	2.4203	3.629	6.2373	0.9565	4.3105	6.4699	6.332	3.8984	3.8876	1.3039	2.9517	3.3469	1.7632	2.9891	2.8362	0.7932	2.1021	0	2.4212	0.4089	3.5781	1.666
AL022341.1	1.6318	0.495	4.3034	1.41	0.9611	0.9176	1.8768	0.1161	0.1448	2.2271	0.2081	1.6253	0.9133	1.3581	1.7625	1.0428	0.1845	0.8816	1.9548	0.2429	0.8061	1.6324	0.6712	3.4867	1.7038	0.5915	1.0403	0.7257	1.174	1.0503	1.8813	0.8921	0.3842	0.9267	2.3614	1.1201	0.2628	0.4536	0.2062	1.5584	1.5101	1.0106	0.197	2.7408	9.2808	0.484	1.0891	2.1249	0.6206
AL365259.1	0.9007	0.459	1.0446	0.0121	0.0341	0.2315	0.7571	2.0766	0.3562	0.122	0.0394	0.8031	0.5473	0.0482	0.4169	0.8317	0.8206	0.4338	0.185	1.8614	0.9344	0.0687	0.0847	0.4262	0.0664	0.0784	2.3624	2.2202	0.037	0	0.0148	0.3545	0.0727	0.0731	0.0131	0.2591	0.8288	0.8298	0.2147	0.4826	0.0953	0.1195	0.0373	0.1945	6.555	1.0991	0.4201	0.1407	0.1007
AC064836.3	2.7394	1.9256	2.6644	5.4316	1.1684	0.4781	4.014	0.2016	0.6034	4.3155	0.759	2.1953	1.1631	2.1816	8.5703	0.6726	0.8331	0.5512	5.0741	0.6748	1.6099	2.2049	0.0777	3.734	3.2722	0.2876	0.2065	0.084	2.2766	3.8913	2.1781	0.6197	0.2669	2.7894	3.8596	1.729	1.3386	0.4201	0.2865	0.6397	2.7973	1.0969	1.3341	2.6518	0.6907	0.5883	1.2803	0.8118	2.2478
AL133370.1	0	0.2869	0	0.1857	0	0	0.0716	0	0	0.3396	36.2575	0	0.1103	0	0	0	0	0	0.2236	0.3519	0.146	0.9197	0	0	0	0.0857	0	0	0.1417	0.1268	0.2271	0.9047	0.5567	0.1119	0.1006	0	0	0	0	0.1026	0.2431	0.0915	1.9263	0.0709	0	0	0	0	0
AC027031.2	9.5976	2.302	6.6027	63.6451	2.958	2.9286	2.8102	2.827	6.8123	7.7278	37.3759	4.6437	2.3318	14.0713	6.4608	15.6084	11.1545	4.0035	10.1882	9.7662	14.3335	2.5801	1.9585	3.6166	2.7417	3.3654	3.0083	6.7494	13.221	23.178	12.7804	12.7387	7.4101	26.9973	2.2419	4.6642	1.4856	4.3427	3.6953	6.3171	12.0716	7.8792	7.5438	4.6057	4.8963	6.2225	8.0441	9.4751	4.4867
AC087741.2	15.3774	3.8064	15.6569	1.7394	8.695	11.0685	21.2229	4.4643	0.6549	11.3993	3.0594	18.379	3.4425	9.9824	5.5806	5.3908	2.921	7.5768	3.0248	5.4926	12.3059	11.0756	1.012	3.2857	10.4269	11.7713	9.7468	10.3942	3.0977	10.6897	6.0277	6.8597	2.6069	9.4309	14.7653	3.0962	2.1791	10.6	0	7.0489	5.6921	6.5712	1.3365	8.8552	3.7482	1.0946	8.5261	3.3641	2.6066
LINC00526	5.8682	3.1631	11.5289	2.0212	8.5495	6.8219	4.529	4.3121	4.4756	4.353	3.1088	7.7929	8.4318	7.6427	3.1813	6.4905	8.0768	6.2554	2.0704	6.4997	5.1844	11.4017	2.7386	16.9391	6.6331	4.2947	8.5711	5.3697	3.6332	5.9199	2.2443	2.8502	4.2248	8.9717	6.1383	6.8682	1.6537	5.5206	4.7708	5.3493	8.1108	7.0763	1.2055	8.5902	0.9627	3.6147	3.5457	4.9375	3.1636
AC022098.1	2.1363	2.3569	2.9168	1.1463	0.5807	2.3287	1.8383	0.9963	0.9098	2.3372	1.6473	2.2914	0.9565	1.2104	2.3216	1.3862	0.379	0.554	1.5914	1.0565	1.2177	1.4466	0.7841	0.9656	2.3618	1.7726	0.6286	0.6723	1.0877	3.1098	1.0231	1.5739	1.1376	1.5491	2.4172	0.8723	0.2752	0.7674	0.486	2.4482	1.4396	0.7022	0.9164	3.5723	2.5635	0.965	1.4983	0.8731	1.2856
AL683813.1	1.9631	1.4037	2.1222	1.7183	0.5265	1.2025	1.566	0.2993	0.4665	3.1426	1.8241	1.513	0.6474	1.466	1.9764	0.6337	0.1903	0.4545	1.7637	0.6887	1.5325	3.8574	0.3749	1.1423	1.8344	0.3812	0.3448	0.4053	2.3329	2.5271	1.1518	0.3679	0.941	1.0152	2.0232	1.0266	0.3048	0.799	0.5715	1.1687	2.2275	1.384	1.8153	3.8481	3.8023	0.6862	0.5615	0.6026	1.0856
AC068338.2	2.5154	1.0234	3.7664	0.5579	1.1766	1.2897	1.8003	0.916	2.0086	0.8928	6.3407	1.6702	2.1532	1.9396	0.911	1.8642	1.6061	2.2064	0.8116	1.5195	1.3157	1.5789	2.7388	2.6479	2.1811	1.9951	1.8596	2.5662	1.0379	10.1432	0.9809	1.6502	1.202	2.1427	2.305	1.4558	0.3098	1.604	1.122	10.3283	2.2365	3.1615	1.1252	2.6361	1.8033	1.514	1.9371	1.9075	1.3264
AC003101.2	0.4787	0.4357	1.1527	0.4513	0.5287	0.1346	0.5216	0.2044	0.1274	2.8885	0	1.9072	0.134	1.1952	3.8779	0.6556	0.3248	0.3104	0.996	0	1.0642	0.4789	0	1.2786	1.1467	0.1041	0.7847	0.2129	1.0332	1.0785	0.6899	0.6281	0	0.5437	0.6113	0.3286	0	0	0	0.2494	0.443	0.1112	0	1.1199	2.9171	0	0	0.561	0.6242
AC005162.2	3.714	1.1722	1.8019	0.3238	0.4268	4.4668	1.3645	0.3941	0.0914	1.0178	0	2.0812	1.7182	0.268	1.0156	1.1289	0.5243	2.1573	0.4629	0.4026	0.5886	0.8734	0.6888	1.7775	2.0016	0.4949	0.6569	0.2482	0.5251	0.3316	0.5074	1.9154	0.4398	0.2316	3.9912	2.0237	0.0346	0.6922	0.5698	0.2125	1.0198	0.4687	0.1244	1.6072	1.2559	0.8214	1.4945	0.2684	0.105
LINC01176	3.903	1.6777	3.2135	1.957	1.2014	1.8446	6.394	0.2836	0.2873	2.4427	0.6831	2.7984	1.6267	1.6717	2.8926	0.5231	0.4929	0.6595	2.945	0.6303	2.1229	1.1492	0.4953	1.6857	2.4405	0.7675	0.4651	0.3878	2.0911	1.0824	2.549	0.3677	0.5573	1.6859	8.6311	1.3585	0.6619	0.6809	0.37	1.5789	2.6128	1.2729	0.421	2.8767	0.1771	0.3694	0.8186	0.6488	1.1843
AL604028.1	12.2073	7.8569	14.4836	10.0062	7.9716	10.6451	11.3089	6.8734	6.6868	9.9124	9.6797	11.7472	8.2184	7.7301	4.7007	7.2681	4.5608	7.226	6.8263	7.8991	9.1765	14.3942	6.4038	10.868	12.8437	5.1555	5.8969	10.385	10.1189	5.0105	9.2804	8.2402	7.7481	7.7359	8.2227	9.3911	2.2792	10.9168	7.1103	8.4785	12.8792	14.0521	3.9721	8.4687	16.3866	5.352	7.466	10.367	4.4983
AC090617.5	3.3435	0.9563	1.4787	1.3507	1.688	2.9545	2.9491	0.9176	0.1271	1.3381	0.9137	0.7929	2.2722	1.9379	2.631	2.4855	0.6481	0.7741	1.8972	2.3458	2.3005	2.7075	0.7859	4.7201	1.9362	1.7658	0.6525	0.4248	0.8591	1.5372	0.9637	3.6034	0.8435	2.5767	2.3175	1.53	1.2307	1.3276	0.6338	0.8708	1.6207	1.6639	0.6054	3.2662	2.0374	0.6375	1.9127	2.7989	0.7785
AC005776.2	2.3324	0.8926	0.8229	1.6067	0.7133	0.3699	2.4328	0.1277	0.0637	1.7527	0.2517	0.5162	0.4017	1.6799	2.5192	0.2621	0.1217	0.1939	1.8099	0.0534	1.0192	0.678	0.1476	1.9807	1.4546	0.5202	0.5555	0.0532	0.4948	1.2703	2.1374	0.3923	0.8027	1.4264	1.2829	0.3558	0.2119	0.0665	0.2948	0.405	1.1438	0.3056	0.3249	1.7005	1.3848	0.2128	0.7	0.0935	1.0138
AC103974.1	1.0894	0.705	0.9993	0.5135	0.4813	0.8168	0.6595	0.2067	0.1933	0.7304	4.0757	0.4823	0.271	0.3022	0.3138	0.4641	0.657	0.4709	0.8242	1.5133	0.7176	0.3229	0.5975	0.8406	0.6245	0.6844	0.1984	0.5383	0.479	0.2337	1.4653	1.2705	0.9406	0.9624	0.4946	0.4985	0.1559	0.0673	0.5049	5.4858	0.8215	1.9679	0.789	1.1327	0	0.1077	0.4102	0.3783	0.5524
AC105137.2	0.9677	0.1566	1.3314	0.4054	0.19	0.3023	0.82	0.0918	0.2862	1.0658	0.9873	0.5711	0.1805	0.8053	0.8361	0.2945	0	0.3485	0.7728	0.096	0.5577	0.5736	0.1769	0.9189	0.7132	0.1871	0.3525	0.0956	0.3481	1.4533	2.789	0.0705	0.2278	0.7937	0.7688	0.1476	0.0346	0.4184	0.1631	1.1201	0.8623	0.1498	0.2725	0.5417	0.3931	0.3826	0.0994	0.084	0.3505
AL121782.1	0.5123	0.4662	0.8812	0	0.4526	0.2881	1.0234	0.5468	0.9546	2.8705	0.392	1.1907	0.7169	2.2386	2.1581	0.421	0.1738	0	1.5505	0	0.1898	0.6833	0.6322	0.821	0.8496	0.5571	1.2598	0.6835	2.2116	0.1649	2.215	0.3361	0.1809	2.3275	0.785	0.3517	0.2475	0.712	0.1943	0.4003	1.7384	0.238	0	0.3688	0	0	0.7102	1.0007	0.4175
ADNP-AS1	7.2615	3.3409	6.4527	3.8503	3.1187	3.97	6.2637	2.4974	6.389	4.1729	7.679	3.0805	2.4272	3.6513	3.2026	3.0384	3.3526	3.4001	3.3192	2.6117	3.5124	5.3808	3.1528	5.8184	4.6086	1.623	4.078	2.7807	4.4987	6.4267	1.8604	4.5652	5.1293	2.4054	5.5116	4.1536	1.1369	3.1958	2.8679	3.8876	5.8487	5.7152	1.4244	5.7352	3.0729	1.7947	2.0504	4.0187	1.6767
ITGB2-AS1	9.0695	2.5906	4.8661	10.2673	1.7061	1.2445	11.1113	0.9078	0.924	2.581	0.249	9.134	4.1774	8.3427	5.6526	1.1885	3.5032	4.5014	25.5754	1.8988	2.3151	0.8393	0.8568	5.401	5.2932	1.3401	9.8166	1.814	5.6977	3.6311	9.2804	1.4234	4.1381	6.6288	4.9646	2.9588	0.8665	0.9649	2.0731	4.2723	19.5165	2.0358	0.1729	5.6382	8.0916	1.2355	1.4436	2.4411	5.2764
AC083798.2	3.1439	1.4904	2.7413	0.8615	1.0497	1.5624	0.9825	1.2174	0.2919	2.2531	2.3079	1.4807	2.5166	1.1866	1.3978	2.3829	2.5296	0.6636	1.0095	1.012	0.9752	1.3165	1.1428	1.2303	2.5596	1.3356	0.7591	0.6828	1.1572	3.6472	1.1379	1.4869	1.2911	2.6572	2.6327	1.2045	0.5416	1.7071	0.6515	1.1807	1.3758	1.5622	0.6354	2.2499	3.4306	1.854	0.6644	1.371	0.4528
AL445645.1	0.4153	0.7559	0.4286	0.9298	0.4586	0.6422	0.641	0.1773	0.7185	1.1187	0.0794	1.6545	1.0459	2.333	0.6056	0.7962	1.2678	2.9617	0.8248	1.0198	0.6155	0.8309	0.4271	0.9428	1.6452	0.2709	1.1914	0	0.4855	2.4726	0.4788	0.7492	0.7334	3.7144	0.9015	0.7602	0.2675	0.4617	0.0787	0.9735	1.217	1.0609	0.1128	0.71	0	0.2771	0.6076	0.2434	0.3723
AC007066.2	4.3521	1.7139	3.9195	1.958	0.8914	1.9134	2.5291	0.8108	0.2949	3.9731	1.9982	1.9703	1.3508	1.8522	2.5127	1.3653	1.1542	0.8721	1.6014	1.5545	2.1108	1.161	1.1392	1.4794	3.0181	0.912	0.3243	0.563	1.7363	10.5941	1.6877	1.8169	0.7546	1.9098	3.2534	1.3217	0.344	1.6276	0.555	4.6165	2.2456	1.2497	1.2752	2.6628	0.8679	2.1826	1.4137	0.9274	1.3929
AL358334.2	0.0898	0.3104	0.0618	1.1424	0.0397	0.9465	0.2608	0.1533	0.2987	0.59	0.1632	0.76	0.0628	0.0981	0.1454	0.4057	0.0609	0.2328	0.1953	0.4609	0.1829	0.1048	0.0369	0.1918	0.3308	0.1367	0	0.519	0.0565	1.5024	0.1682	0.3681	0.0634	1.3127	1.3182	0.1232	0.094	0.1622	0.0425	0.0117	0.18	0.6984	0.0569	0.1454	0.7111	0.8586	0.2281	0.2455	0.1024
AC137932.1	4.9168	2.6127	4.8989	2.4772	2.0222	4.0997	4.7004	0.3137	0.7822	1.9486	0.6919	0.788	1.7397	1.4111	2.1243	1.5169	1.3419	1.6854	2.373	3.0784	2.3451	4.259	0.4184	0.483	1.562	0.9586	0.5559	0.6032	1.8093	2.9465	5.3753	0.9269	1.1577	1.8614	3.0019	1.9913	0.5461	0.6912	0.6428	3.7093	2.336	1.1288	1.6168	1.7086	3.3061	0.5531	1.8279	0.4416	2.1186
LINC00887	12.4773	56.5291	36.743	1.5163	23.171	17.5044	2.708	9.3733	27.1243	25.8669	0.0166	26.6589	19.9644	61.2477	34.598	35.0539	14.7025	11.4433	1.3732	27.214	29.1056	33.7483	3.2367	9.7306	36.8086	6.6654	12.7685	8.6613	14.6536	0.1399	7.7313	0.4278	0.9366	18.1087	29.31	11.3398	7.715	29.9201	12.9396	7.0091	3.8891	18.5377	0	28.1647	17.0344	29.8816	4.1247	27.157	14.0231
C9orf106	0.841	0.9306	2.5688	0.111	0.2229	0.6053	0.4398	0.0287	0.0179	1.0149	0.3475	0.4244	0.3201	0.7559	0.6758	0.7002	0.2282	0.1527	0.2036	0.4806	1.7199	0.5384	0.0553	0.6289	2.0702	0.5852	0.0735	0.0299	0.4114	0.7795	0.2715	0.4193	0.0475	0.5922	2.1133	0.2001	0.0975	0.1496	0.1275	0.4206	0.5603	0.0781	0.1462	1.7677	0.738	0.2694	0.1451	0.0263	0.2193
AL358472.2	2.0891	1.6567	2.2071	1.1604	0.3625	1.5104	1.3278	1.083	0.6355	3.4729	1.1989	2.2293	1.1692	1.3971	1.5472	1.226	1.2654	1.4027	1.8063	1.5324	1.8797	1.2937	0.6138	2.6703	2.4745	0.7139	0.6115	1.1281	0.6441	1.8729	1.8924	1.7131	1.054	1.7371	1.3718	1.0925	0.4325	1.0369	0.7072	2.8371	1.657	1.3862	0.2702	2.1482	3.819	0.7302	0.9423	1.5739	1.3133
AL157823.2	0.4744	0.3454	4.7869	3.4286	0.0699	0.1779	0.0574	0.0675	0.1684	0.6816	0.3025	0	0.4425	0.3948	0.6149	0.0866	0	0.2051	0.5384	0.2824	1.8749	1.7929	0.3903	1.0137	0.5245	0.2063	0	0	0.3982	2.9519	0.7293	0.6225	0.3351	0.9878	0.1615	0.0724	0.0509	0.0879	0.1199	1.1533	1.1707	0.2938	0.1145	0.9107	0	0.1407	0	0.1236	0.8248
TRPC7-AS1	1.6099	0.2512	3.0063	0	1.6256	1.552	0.8353	0.1964	0.1224	0.4956	0	1.3744	0.7723	0.7178	0.5962	0.252	0.4681	3.7277	0.783	1.0269	1.8746	1.5338	2.6488	10.1971	0.2543	1.9006	1.6337	2.8638	2.1511	0.2961	0	0	1.6246	0.1306	0	2.5259	0	1.9178	2.8777	0	3.6891	5.4483	0.0833	2.235	3.6439	0	0.5668	0.5391	0.075
MIR34AHG	3.1124	7.5368	3.446	7.9077	0.6982	2.9808	4.4642	0.5242	1.4239	4.8102	0.9862	3.3502	2.0821	5.4184	6.7049	1.1987	0.4206	1.3872	4.4473	2.1496	4.4863	5.3837	0.3401	2.2795	7.052	1.7926	0.4916	0.5082	5.4886	0.8608	6.1322	1.4994	0.9876	1.8158	7.2526	1.9305	0.7988	1.1354	1.0372	4.2875	5.1828	1.7958	0.2906	8.1825	0.489	0.8221	1.2508	1.1779	2.8574
RAB11B-AS1	3.8438	3.2981	5.5406	2.6744	2.7896	3.8084	4.1549	2.8523	3.4591	4.6938	5.8827	9.1761	3.483	5.0271	5.8124	2.9076	1.9868	3.738	5.0546	2.37	2.7126	3.7841	2.7857	2.2977	4.2495	3.264	3.3505	4.314	3.6872	3.6523	6.5417	6.304	2.7798	2.1828	3.5992	2.4709	0.7074	3.307	2.6719	3.6231	3.3312	3.5283	1.8559	5.7972	16.8421	4.56	2.8191	2.5027	2.3867
AC027373.1	0.4632	0.2698	0.7648	1.7029	0.3274	0.1563	1.5814	0	0.148	1.2777	0.3899	0.5536	0.0518	1.0987	1.2007	0.1015	0.0628	0.3604	1.4018	0.4136	0.2746	1.0503	0	0.7423	0.5462	0.2418	0.2531	0.412	0.7665	1.133	0.6408	0.1823	0.1309	0.5261	0.6151	0.1696	0.2387	0.412	0.281	0.2413	0.8573	0.2152	0.1006	0.9002	0	0.1649	0.2854	0.4343	0.4228
AL078644.1	2.9544	1.1267	1.6454	0.9283	2.2373	2.4525	0.8686	0.7808	0.4494	0.7276	1.238	0.3737	2.8346	1.2294	1.3676	1.8495	1.5271	1.4594	0.7983	0.5025	1.7722	0.9382	0.5787	3.2315	1.5553	1.9581	1.4606	1.2513	1.2146	0.9056	0.5677	3.6917	3.3788	1.9174	1.7964	3.2833	0.3625	2.7373	0.4801	1.2458	1.3887	1.699	0.5095	1.519	0.3429	0.7511	1.2567	0.9893	0.9172
AC084018.1	12.9471	8.214	18.4503	15.7787	2.2061	5.8245	11.9573	1.5793	4.5292	15.5445	17.4087	3.0703	4.9688	5.657	13.9042	1.621	0.8783	2.6381	9.9353	1.6516	7.6749	7.0309	1.6737	11.6585	17.1081	2.0916	0.1011	0.4935	10.7784	9.286	6.717	2.548	3.7888	9.4529	13.3197	6.1786	0.5361	1.9536	1.8934	7.9967	10.7261	3.1787	7.3677	27.1599	0	1.6457	4.5579	3.4682	7.2954
AC099509.1	1.7849	1.1223	0.5582	0.2294	0.215	1.2775	1.0608	2.9096	1.1229	0.3497	0.1863	0.5387	0.2724	3.6462	0.3155	3.3775	0.2202	0.7364	1.0435	3.3326	0	0.4329	0.1335	0.4334	1.8537	0.8469	2.1279	0.433	0.0584	0	1.0289	0.7451	1.3754	1.29	0.663	0.1485	7.3164	0.2706	0.0615	0	0.8008	0.9798	0.1763	1.752	0	0.2887	0.5498	1.5213	1.2166
AC068768.1	0.6169	0.6737	0.8488	0.4361	0.2725	0.8672	0.7842	0	0.1642	0.5317	0.354	0.4096	0.5179	0.3851	1.3992	0.5069	0.4185	0.2	0.35	0.5509	0	1.4399	0	0.8238	0.4547	0.4025	0.5056	0.5487	0.4438	0.1985	1.778	0.2023	0.2179	0.3503	1.1027	0	0.0993	0.6859	0.2339	0.482	1.7126	0	0	1.4432	0	0	0.38	0.241	0.2011
OCIAD1-AS1	1.9962	2.3252	4.9438	2.6343	1.94	2.245	3.045	0.8522	0.8501	6.1943	3.5132	0.7953	2.2344	2.7412	2.3285	0.656	1.0834	1.2941	4.3797	0.713	1.1833	5.5912	3.2843	7.2508	4.5608	0.8682	0.8726	0.3551	2.1542	5.6534	3.2219	2.8809	0.846	0.4534	4.4859	4.9326	0.6429	1.9974	1.211	3.7433	0.9852	1.6689	2.7469	2.7301	0	0.3552	1.8447	4.3669	2.4727
C1orf229	1.4056	1.1768	2.2886	0.1767	0.2484	1.7126	1.7528	0.3801	0.3741	2.1001	2.0795	1.6178	0.6031	0.7311	1.4575	1.1549	0.9218	0.7898	0.319	0.7113	1.0415	0.9062	0.8865	2.0023	1.882	0.9986	0.5376	1.0001	0.573	0.4825	0.9993	1.0143	0.695	0.5321	2.7998	0.729	0.0604	0.8074	0.3553	1.6596	0.6937	0.6529	0.3563	1.484	1.3134	0.5419	0.8371	0.6589	0.3971
ZNF674-AS1	4.659	3.1218	4.9921	4.1197	3.2602	4.0806	3.2644	2.922	1.8437	6.2017	5.5686	2.765	3.6459	4.4008	3.3934	3.4102	2.6292	1.5771	3.0725	2.614	4.491	5.1143	2.8152	4.537	4.862	2.0981	1.6221	1.0268	2.6103	20.1426	2.8045	3.5432	1.4853	5.268	4.9486	3.3206	0.8631	2.9109	1.9384	7.023	4.2987	2.3173	2.2545	6.0247	1.6582	3.8885	2.0574	1.8362	2.0832
AC015909.2	1.5473	0.2112	1.0645	0.2735	0.5126	1.4139	0.7025	0.3303	0.103	1.0837	0.074	1.2843	0.433	0.2415	0.7521	0.8475	0	0.2508	0.2195	0.3454	0	0.258	0	0.4133	0.4277	0.1682	0.1057	0.344	0.1391	1.2449	0.3345	0.1269	0.2732	0.2197	1.8769	0	0.0623	0.215	0.0733	0.1007	0.4773	0.1797	0	0.4873	3.3	0.1721	0.2979	0.4533	0.063
AC046143.1	0.8708	2.1792	3.9686	4.0014	2.2118	1.9586	1.3836	1.5335	2.8971	2.0172	0.4164	1.7345	1.1574	1.4267	1.6224	2.1463	0.2954	1.4113	0.7	2.8186	2.9035	1.3066	1.4326	1.7443	1.6044	1.2309	1.3084	0.7744	1.1746	6.0251	0.6902	2.9275	6.7658	1.8543	1.6677	0.8467	3.2952	1.5732	1.692	0.2835	2.2159	0.8595	0.5912	3.4081	0.5306	0.9684	1.1399	2.3811	0.7451
AC004812.2	3.4861	2.9058	5.9784	2.667	1.6962	4.148	3.1745	3.8611	1.8289	4.1808	5.7606	4.2941	2.3753	3.1852	4.6166	3.4317	4.5929	2.9807	3.6122	3.5642	3.4817	3.2346	3.9901	2.9417	3.7051	2.4172	1.7116	1.6177	2.5444	8.6179	4.223	3.3144	2.0699	5.193	4.2061	3.0749	1.0089	2.8648	1.3409	9.0008	4.3326	3.3559	2.964	5.237	1.4162	3.1917	3.2993	2.4869	2.9316
AC091729.2	0.3503	0.8927	10.8452	0.3302	3.8688	0.788	3.4353	0	0.1865	0	0	2.5587	0.5882	0	0.4541	0.1919	0.9506	0.9085	0	1.2513	0	0.7009	0.8646	0.5614	6.0676	3.8092	0	0	0.252	1.3529	0	0.2298	0.2475	0.5968	0.5368	0.3206	0	0	0.9298	0	0.2161	0.1627	0.3806	0.6304	16.2238	0.3117	1.0791	0	0
AL360181.2	11.3233	7.4439	19.9979	45.3238	2.0158	7.1278	11.9693	1.5152	2.9689	11.6542	2.8451	2.1321	3.5943	5.4855	5.2572	2.7772	1.2612	3.287	9.2061	3.3201	5.7605	16.23	1.8074	7.7639	6.9131	2.9403	0.6464	0.7516	7.4777	8.485	6.8195	1.2196	1.9101	15.1636	10.4444	3.1708	0.7076	2.4427	1.666	15.8463	7.1942	4.553	3.2437	10.3404	0	1.9548	1.8741	2.1127	3.9666
AC027237.3	1.099	0.6532	0.6326	0.3488	0.5747	0.8955	0.5702	0.2968	0.788	0.783	0.3433	0.6106	0.4017	0.714	0.5959	0.6388	0.9129	0.4653	0.7721	0.3205	0.5651	1.2265	0.4244	1.5695	0.653	0.9658	0.6128	0.4788	0.5728	1.0683	0.8792	0.3973	0.5545	0.4967	1.4319	0.4926	0.2312	0.8478	0.2806	0.8646	0.7749	1.1355	0.2355	0.4601	1.1207	0.2395	0.6149	0.4731	0.3144
[truncated: 727 more rows]
[truncated: 492 more columns]
